# Supplementary material for: Application of chiral triazole-substituted iodoarenes in the enantioselective construction of spirooxazolines
Source: Royal Society of Chemistry journal article supplement (doi:10.1039/d1cc03246a), 2021-01-01
Supplement: d1cc03246a1.pdf [file d1cc03246a1.pdf]

## Supporting Information

# Application of Chiral Triazole-Substituted Iodoarenes in the Enantioselective Construction of Spirooxazolines

*Ayham H. Abazid<sup>a</sup> and Boris J. Nachtsheim<sup>\*a</sup>*

<sup>a</sup>*Universität Bremen, Institut für Organische und Analytische Chemie, Leobener Straße 7,  
28359 Bremen, Germany*

*\*Corresponding author: [nachtsheim@uni-bremen.de](mailto:nachtsheim@uni-bremen.de)*

## Table of Content

|                                                                                                                                        |           |
|----------------------------------------------------------------------------------------------------------------------------------------|-----------|
| <b>1. General Information</b> .....                                                                                                    | <b>5</b>  |
| <b>2. Experimental Section</b> .....                                                                                                   | <b>7</b>  |
| <b>2.1. Synthesis of <i>N</i>-(hydroxymethyl)benzamide derivatives (GP1)</b> .....                                                     | <b>7</b>  |
| 2.1.1. Synthesis of 4-bromo- <i>N</i> -(hydroxymethyl)benzamide (a1) .....                                                             | 7         |
| 2.1.2. Synthesis of 4-chloro- <i>N</i> -(hydroxymethyl)benzamide (b1) .....                                                            | 7         |
| 2.1.3. Synthesis of 4-fluoro- <i>N</i> -(hydroxymethyl)benzamide (c1) .....                                                            | 8         |
| 2.1.4. Synthesis of <i>N</i> -(hydroxymethyl)-4-(trifluoromethyl)benzamide (d1) .....                                                  | 8         |
| 2.1.5. Synthesis of <i>N</i> -(hydroxymethyl)-4-methoxybenzamide (e1).....                                                             | 9         |
| 2.1.6. Synthesis of <i>N</i> -(hydroxymethyl)-4-nitrobenzamide (f1) .....                                                              | 9         |
| 2.1.7. Synthesis of 2-bromo- <i>N</i> -(hydroxymethyl)benzamide (g1) .....                                                             | 9         |
| 2.1.8. Synthesis of 3-bromo- <i>N</i> -(hydroxymethyl)benzamide (h1) .....                                                             | 10        |
| 2.1.9. Synthesis of 2-ethoxy- <i>N</i> -(hydroxymethyl)benzamide (i1).....                                                             | 10        |
| 2.1.10. Synthesis of 3,5-dibromo- <i>N</i> -(hydroxymethyl)benzamide (j1) .....                                                        | 11        |
| 2.1.11. Synthesis of <i>N</i> -(hydroxymethyl)-3,4,5-trimethoxybenzamide (k1).....                                                     | 11        |
| 2.1.12. Synthesis of <i>N</i> -(hydroxymethyl)picolinamide (l1) .....                                                                  | 11        |
| <b>2.2. Synthesis of <i>N</i>-((2-hydroxynaphthalen-1-yl)methyl)benzamide derivatives (GP2)</b> .....                                  | <b>12</b> |
| 2.2.1. Synthesis of <i>N</i> -((2-hydroxynaphthalen-1-yl)methyl)benzamide (4a) .....                                                   | 12        |
| 2.2.2. Synthesis of <i>N</i> -((6-bromo-2-hydroxynaphthalen-1-yl)methyl)benzamide (4b).....                                            | 13        |
| 2.2.3. Synthesis of <i>N</i> -((2-hydroxy-7-methoxynaphthalen-1-yl)methyl)benzamide (4c).....                                          | 13        |
| 2.2.4. Synthesis of <i>N</i> -((2,7-dihydroxynaphthalen-1-yl)methyl)benzamide (4d) .....                                               | 14        |
| 2.2.5. Synthesis methyl 4-(benzamidomethyl)-3-hydroxy-2-naphthoate (4e).....                                                           | 14        |
| 2.2.6. Synthesis of ethyl 4-(benzamidomethyl)-3-hydroxy-2-naphthoate (4f).....                                                         | 15        |
| 2.2.7. Synthesis of <i>N</i> -((2-hydroxy-5,6,7,8-tetrahydronaphthalen-1-yl)methyl) benzamide (4g).....                                | 15        |
| 2.2.8. Synthesis of 4-bromo- <i>N</i> -((2-hydroxynaphthalen-1-yl)methyl)benzamide (4h).....                                           | 16        |
| 2.2.9. Synthesis of 4-bromo- <i>N</i> -((2-hydroxynaphthalen-1-yl)methyl)benzamide (4i).....                                           | 16        |
| 2.2.10. Synthesis of 4-fluoro- <i>N</i> -((2-hydroxynaphthalen-1-yl)methyl)benzamide (4j) .....                                        | 17        |
| 2.2.11. Synthesis of 2-bromo- <i>N</i> -((2-hydroxynaphthalen-1-yl)methyl)benzamide (4k) .....                                         | 17        |
| 2.2.12. Synthesis of 3-bromo- <i>N</i> -((2-hydroxynaphthalen-1-yl)methyl)benzamide (4l).....                                          | 18        |
| 2.2.13. Synthesis of 3,5-dibromo- <i>N</i> -((2-hydroxynaphthalen-1-yl)methyl) benzamide (4m).....                                     | 18        |
| 2.2.14. Synthesis of <i>N</i> -((2-hydroxynaphthalen-1-yl)methyl)-4-(trifluoromethyl) benzamide (4n).....                              | 19        |
| 2.2.15. Synthesis of <i>N</i> -((2-hydroxynaphthalen-1-yl)methyl)-4-nitrobenzamide (4o).....                                           | 19        |
| 2.2.16. Synthesis of <i>N</i> -((2-hydroxynaphthalen-1-yl)methyl)-4-methoxy benzamide (4p) .....                                       | 20        |
| 2.2.17. Synthesis of 2-ethoxy- <i>N</i> -((2-hydroxynaphthalen-1-yl)methyl)benzamide (4q) .....                                        | 20        |
| 2.2.18. Synthesis of <i>N</i> -((2-hydroxynaphthalen-1-yl)methyl)-3,4,5-trimethoxy benzamide (4r) .....                                | 21        |
| 2.2.19. Synthesis of <i>N</i> -((2-hydroxynaphthalen-1-yl)methyl)picolinamide (4s) .....                                               | 21        |
| <b>2.3. Synthesis of Spirooxazoline compounds (GP3)</b> .....                                                                          | <b>22</b> |
| 2.3.1. Synthesis of ( <i>S</i> )-2'-phenyl-2 <i>H</i> ,4' <i>H</i> -spiro[naphthalene-1,5'-oxazol]-2-one (5a).....                     | 22        |
| 2.3.2. Synthesis of ( <i>S</i> )-6-bromo-2'-phenyl-2 <i>H</i> ,4' <i>H</i> -spiro[naphthalene-1,5'-oxazol]-2-one (5b) .....            | 23        |
| 2.3.3. Synthesis of ( <i>S</i> )-7-methoxy-2'-phenyl-2 <i>H</i> ,4' <i>H</i> -spiro[naphthalene-1,5'-oxazol]-2-one (5c).....           | 24        |
| 2.3.4. Synthesis of ( <i>S</i> )-7-hydroxy-2'-phenyl-2 <i>H</i> ,4' <i>H</i> -spiro[naphthalene-1,5'-oxazol]-2-one (5d).....           | 24        |
| 2.3.5. Synthesis of ( <i>S</i> )-methyl 2-oxo-2'-phenyl-2 <i>H</i> ,4' <i>H</i> -spiro[naphthalene-1,5'-oxazole]-3-carboxylate (5e)... | 25        |
| 2.3.6. Synthesis of ( <i>S</i> )-2'-phenyl-3-propionyl-2 <i>H</i> ,4' <i>H</i> -spiro[naphthalene-1,5'-oxazol]-2-one (5f).....         | 25        |
| 2.3.7. Synthesis of ( <i>S</i> )-2'-phenyl-5,6,7,8-tetrahydro-2 <i>H</i> ,4' <i>H</i> -spiro[naphthalene-1,5'-oxazol]-2-one (5g) ..... | 26        |

|                                                                                                                                  |           |
|----------------------------------------------------------------------------------------------------------------------------------|-----------|
| 2.3.8. Synthesis of (S)-2'-(4-bromophenyl)-2 <i>H</i> ,4' <i>H</i> -spiro[naphthalene-1,5'-oxazol]-2-one (5h).....               | 27        |
| 2.3.9. Synthesis of (S)-2'-(4-chlorophenyl)-2 <i>H</i> ,4' <i>H</i> -spiro[naphthalene-1,5'-oxazol]-2-one (5i) .....             | 27        |
| 2.3.10. Synthesis of (S)-2'-(4-fluorophenyl)-2 <i>H</i> ,4' <i>H</i> -spiro[naphthalene-1,5'-oxazol]-2-one (5j) .....            | 28        |
| 2.3.11. Synthesis of (S)-2'-(2-bromophenyl)-2 <i>H</i> ,4' <i>H</i> -spiro[naphthalene-1,5'-oxazol]-2-one (5k) .....             | 29        |
| 2.3.12. Synthesis of (S)-2'-(3-bromophenyl)-2 <i>H</i> ,4' <i>H</i> -spiro[naphthalene-1,5'-oxazol]-2-one (5l) .....             | 29        |
| 2.3.13. Synthesis (S)-2'-(3,5-dibromophenyl)-2 <i>H</i> ,4' <i>H</i> -spiro[naphthalene-1,5'-oxazol]-2-one (5m) .....            | 30        |
| 2.3.14. Synthesis of (S)-2'-(4-(trifluoromethyl)phenyl)-2 <i>H</i> ,4' <i>H</i> -spiro[naphthalene-1,5'-oxazol]-2-one (5n) ..... | 31        |
| 2.3.15. Synthesis of (S)-2'-(4-nitrophenyl)-2 <i>H</i> ,4' <i>H</i> -spiro[naphthalene-1,5'-oxazol]-2-one (5o) .....             | 31        |
| 2.3.16. Synthesis of (S)-2'-(4-methoxyphenyl)-2 <i>H</i> ,4' <i>H</i> -spiro[naphthalene-1,5'-oxazol]-2-one (5p) .....           | 32        |
| 2.3.17. Synthesis of (S)-2'-(2-ethoxyphenyl)-2 <i>H</i> ,4' <i>H</i> -spiro[naphthalene-1,5'-oxazol]-2-one (5q) .....            | 33        |
| 2.3.18. Synthesis of (S)-2'-(3,4,5-trimethoxyphenyl)-2 <i>H</i> ,4' <i>H</i> -spiro[naphthalene-1,5'-oxazol]-2-one (5r) .....    | 33        |
| 2.3.19. Synthesis of (S)-2'-(pyridin-2-yl)-2 <i>H</i> ,4' <i>H</i> -spiro[naphthalene-1,5'-oxazol]-2-one (5s) .....              | 34        |
| <b>2.4. Derivatizations.....</b>                                                                                                 | <b>35</b> |
| 2.4.1. Synthesis of (1 <i>S</i> ,2 <i>S</i> )-2'-phenyl-2 <i>H</i> ,4' <i>H</i> -spiro[naphthalene-1,5'-oxazol]-2-ol (7) .....   | 35        |
| 2.4.2. Synthesis of (S)-2'-phenyl-2 <i>H</i> ,4' <i>H</i> -spiro[benzo[d]oxepine-1,5'-oxazol]-2-one (8) .....                    | 36        |
| 2.4.3. Synthesis of (Z)-3-(2-(2-phenyloxazol-5-yl)phenyl)acrylaldehyde (9).....                                                  | 36        |
| <b>3. NMR Spectra for New Compounds.....</b>                                                                                     | <b>37</b> |
| 3.1. NMR of 4-bromo- <i>N</i> -(hydroxymethyl)benzamide (a1) in DMSO- <i>d</i> <sub>6</sub> .....                                | 38        |
| 3.2. NMR of 4-chloro- <i>N</i> -(hydroxymethyl)benzamide (b1) in CDCl <sub>3</sub> .....                                         | 39        |
| 3.3. NMR of 4-fluoro- <i>N</i> -(hydroxymethyl)benzamide (c1) in CDCl <sub>3</sub> .....                                         | 41        |
| 3.4. NMR of <i>N</i> -(hydroxymethyl)-4-(trifluoromethyl)benzamide in (d1) CDCl <sub>3</sub> .....                               | 43        |
| 3.5. NMR of <i>N</i> -(hydroxymethyl)-4-methoxybenzamide (e1) in DMSO- <i>d</i> <sub>6</sub> .....                               | 45        |
| 3.6. NMR of <i>N</i> -(hydroxymethyl)-4-nitrobenzamide (f1) in DMSO- <i>d</i> <sub>6</sub> .....                                 | 46        |
| 3.7. NMR of 2-bromo- <i>N</i> -(hydroxymethyl)benzamide (g1) CDCl <sub>3</sub> .....                                             | 47        |
| 3.8. NMR of 3-bromo- <i>N</i> -(hydroxymethyl)benzamide (h1) in CDCl <sub>3</sub> .....                                          | 48        |
| 3.9. NMR of 2-ethoxy- <i>N</i> -(hydroxymethyl)benzamide (i1) in CDCl <sub>3</sub> .....                                         | 49        |
| 3.10. NMR of 3,5-dibromo- <i>N</i> -(hydroxymethyl)benzamide (j1) in DMSO- <i>d</i> <sub>6</sub> .....                           | 50        |
| 3.11. NMR of <i>N</i> -(hydroxymethyl)-3,4,5-trimethoxybenzamide (k1) in DMSO- <i>d</i> <sub>6</sub> .....                       | 51        |
| 3.12. NMR of <i>N</i> -(hydroxymethyl)picolinamide (l1) in CDCl <sub>3</sub> .....                                               | 52        |
| 3.13. NMR of <i>N</i> -((2-hydroxynaphthalen-1-yl)methyl)benzamide (4a) in DMSO- <i>d</i> <sub>6</sub> .....                     | 53        |
| 3.14. NMR of <i>N</i> -((6-bromo-2-hydroxynaphthalen-1-yl)methyl)benzamide (4b) in CDCl <sub>3</sub> .....                       | 54        |
| 3.15. NMR of <i>N</i> -((2-hydroxy-7-methoxynaphthalen-1-yl)methyl)benzamide (4c) in CDCl <sub>3</sub> .....                     | 55        |
| 3.16. NMR of <i>N</i> -((2,7-dihydroxynaphthalen-1-yl)methyl)benzamide (4d) in CDCl <sub>3</sub> .....                           | 56        |
| 3.17. NMR of 4-(benzamidomethyl)-3-hydroxy-2-naphthoate (4e) in CDCl <sub>3</sub> .....                                          | 57        |
| 3.18. NMR of ethyl 4-(benzamidomethyl)-3-hydroxy-2-naphthoate (4f) in CDCl <sub>3</sub> .....                                    | 58        |
| 3.19. NMR of <i>N</i> -((2-hydroxy-4a,5,6,7,8,8a-hexahydronaphthalen-1-yl)methyl) benzamide (4g) in CDCl <sub>3</sub><br>.....   | 59        |
| 3.20. NMR of 4-bromo- <i>N</i> -((2-hydroxynaphthalen-1-yl)methyl)benzamide (4h) in CDCl <sub>3</sub> .....                      | 60        |
| 3.21. NMR of 4-chloro- <i>N</i> -((2-hydroxynaphthalen-1-yl)methyl)benzamide (4i) in CDCl <sub>3</sub> .....                     | 61        |
| 3.22. NMR of 4-fluoro- <i>N</i> -((2-hydroxynaphthalen-1-yl)methyl)benzamide (4j) in CDCl <sub>3</sub> .....                     | 62        |
| 3.23. NMR of 2-bromo- <i>N</i> -((2-hydroxynaphthalen-1-yl)methyl)benzamide (4k) in CDCl <sub>3</sub> .....                      | 64        |
| 3.24. NMR of 3-bromo- <i>N</i> -((2-hydroxynaphthalen-1-yl)methyl)benzamide (4l) in CDCl <sub>3</sub> .....                      | 65        |

|                                                                                                                                                            |           |
|------------------------------------------------------------------------------------------------------------------------------------------------------------|-----------|
| 3.26.NMR of <i>N</i> -((2-hydroxynaphthalen-1-yl)methyl)-4-(trifluoromethyl) benzamide (4n) in CDCl <sub>3</sub> .....                                     | 67        |
| 3.27.NMR of <i>N</i> -((2-hydroxynaphthalen-1-yl)methyl)-4-nitrobenzamide (4o) in CDCl <sub>3</sub> .....                                                  | 69        |
| 3.28.NMR of <i>N</i> -((2-hydroxynaphthalen-1-yl)methyl)-4-methoxy benzamide (4p) in CDCl <sub>3</sub> .....                                               | 70        |
| 3.29.NMR of 2-ethoxy- <i>N</i> -((2-hydroxynaphthalen-1-yl)methyl)benzamide (4q) in CDCl <sub>3</sub> .....                                                | 71        |
| 3.30.NMR of <i>N</i> -((2-hydroxynaphthalen-1-yl)methyl)-3,4,5-trimethoxy benzamide (4r) in CDCl <sub>3</sub> .....                                        | 72        |
| 3.31.NMR of <i>N</i> -((2-hydroxynaphthalen-1-yl)methyl)picolinamide (4s) in CDCl <sub>3</sub> .....                                                       | 73        |
| 3.32.NMR of ( <i>S</i> )-2'-phenyl-2 <i>H</i> ,4' <i>H</i> -spiro[naphthalene-1,5'-oxazol]-2-one (5a) in CDCl <sub>3</sub> .....                           | 74        |
| 3.33.NMR of ( <i>S</i> )-6-bromo-2'-phenyl-2 <i>H</i> ,4' <i>H</i> -spiro[naphthalene-1,5'-oxazol]-2-one (5b) in CDCl <sub>3</sub> .....                   | 75        |
| 3.34.NMR of ( <i>S</i> )-7-methoxy-2'-phenyl-2 <i>H</i> ,4' <i>H</i> -spiro[naphthalene-1,5'-oxazol]-2-one (5c) in CDCl <sub>3</sub> ....                  | 76        |
| 3.35.NMR of ( <i>S</i> )-7-hydroxy-2'-phenyl-2 <i>H</i> ,4' <i>H</i> -spiro[naphthalene-1,5'-oxazol]-2-one (5d) in CDCl <sub>3</sub> ....                  | 77        |
| 3.36.NMR of ( <i>S</i> )-methyl 2-oxo-2'-phenyl-2 <i>H</i> ,4' <i>H</i> -spiro[naphthalene-1,5'-oxazole]-3-carboxylate (5e) in CDCl <sub>3</sub> .....     | 78        |
| 3.37.NMR of ( <i>S</i> )-2'-phenyl-3-propionyl-2 <i>H</i> ,4' <i>H</i> -spiro[naphthalene-1,5'-oxazol]-2-one (5f) in CDCl <sub>3</sub> ....                | 79        |
| 3.38.NMR of (1 <i>S</i> )-2'-phenyl-4a,5,6,7,8,8a-hexahydro-2 <i>H</i> ,4' <i>H</i> -spiro [naphthalene-1,5'-oxazol]-2-one (5g) in CDCl <sub>3</sub> ..... | 80        |
| 3.39.NMR of ( <i>S</i> )-2'-(4-bromophenyl)-2 <i>H</i> ,4' <i>H</i> -spiro[naphthalene-1,5'-oxazol]-2-one (5h) in CDCl <sub>3</sub> .....                  | 81        |
| 3.40.NMR of ( <i>S</i> )-2'-(4-chlorophenyl)-2 <i>H</i> ,4' <i>H</i> -spiro[naphthalene-1,5'-oxazol]-2-one (5i) in CDCl <sub>3</sub> .....                 | 82        |
| 3.41.NMR of ( <i>S</i> )-2'-(4-fluorophenyl)-2 <i>H</i> ,4' <i>H</i> -spiro[naphthalene-1,5'-oxazol]-2-one (5j) in CDCl <sub>3</sub> .....                 | 83        |
| 3.42.NMR of ( <i>S</i> )-2'-(2-bromophenyl)-2 <i>H</i> ,4' <i>H</i> -spiro[naphthalene-1,5'-oxazol]-2-one (5k) in CDCl <sub>3</sub> .....                  | 85        |
| 3.43.NMR of ( <i>S</i> )-2'-(3-bromophenyl)-2 <i>H</i> ,4' <i>H</i> -spiro[naphthalene-1,5'-oxazol]-2-one (5l) in CDCl <sub>3</sub> .....                  | 86        |
| 3.44.NMR of ( <i>S</i> )-2'-(3,5-dibromophenyl)-2 <i>H</i> ,4' <i>H</i> -spiro[naphthalene-1,5'-oxazol]-2-one (5m) in CDCl <sub>3</sub> .....              | 87        |
| 3.45.NMR of ( <i>S</i> )-2'-(4-(trifluoromethyl)phenyl)-2 <i>H</i> ,4' <i>H</i> -spiro[naphthalene-1,5'-oxazol]-2-one (5n) in CDCl <sub>3</sub> .....      | 88        |
| 3.46.NMR of ( <i>S</i> )-2'-(4-nitrophenyl)-2 <i>H</i> ,4' <i>H</i> -spiro[naphthalene-1,5'-oxazol]-2-one (5o) in CDCl <sub>3</sub> .....                  | 90        |
| 3.47.NMR of ( <i>S</i> )-2'-(4-methoxyphenyl)-2 <i>H</i> ,4' <i>H</i> -spiro[naphthalene-1,5'-oxazol]-2-one (5p) in CDCl <sub>3</sub> ..                   | 91        |
| 3.48.NMR of ( <i>S</i> )-2'-(2-ethoxyphenyl)-2 <i>H</i> ,4' <i>H</i> -spiro[naphthalene-1,5'-oxazol]-2-one (5q) in CDCl <sub>3</sub> .....                 | 92        |
| 3.49.NMR of ( <i>S</i> )-2'-(3,4,5-trimethoxyphenyl)-2 <i>H</i> ,4' <i>H</i> -spiro[naphthalene-1,5'-oxazol]-2-one (5r) in CDCl <sub>3</sub> .....         | 93        |
| 3.50.NMR of ( <i>S</i> )-2'-(pyridin-2-yl)-2 <i>H</i> ,4' <i>H</i> -spiro[naphthalene-1,5'-oxazol]-2-one (5s) in CDCl <sub>3</sub> .....                   | 94        |
| 3.51.NMR of (1 <i>S</i> ,2 <i>S</i> )-2'-phenyl-2 <i>H</i> ,4' <i>H</i> -spiro[naphthalene-1,5'-oxazol]-2-ol (7) in CDCl <sub>3</sub> .....                | 95        |
| 3.52.NMR of ( <i>S</i> )-2'-phenyl-2 <i>H</i> ,4' <i>H</i> -spiro[benzo[d]oxepine-1,5'-oxazol]-2-one (8) in CDCl <sub>3</sub> .....                        | 96        |
| <b>3.53.NMR of (<i>Z</i>)-3-(2-(2-phenyloxazol-5-yl)phenyl)acrylaldehyde (9) in CDCl<sub>3</sub> .....</b>                                                 | <b>97</b> |
| <b>4. HPLC Chromatograms .....</b>                                                                                                                         | <b>98</b> |
| 4.1. HPLC Chromatograms of Compound (5a) .....                                                                                                             | 98        |
| 4.2. HPLC Chromatograms of Compound (5b) .....                                                                                                             | 99        |
| 4.3. HPLC Chromatograms of Compound (5c).....                                                                                                              | 100       |
| 4.4. HPLC Chromatograms of Compound (5d) .....                                                                                                             | 101       |
| 4.5. HPLC Chromatograms of Compound (5e) .....                                                                                                             | 102       |
| 4.6. HPLC Chromatograms of Compound (5f) .....                                                                                                             | 103       |
| 4.7. HPLC Chromatograms of compound (5g) .....                                                                                                             | 104       |
| 4.8. HPLC Chromatograms of compound (5h) .....                                                                                                             | 105       |



|                                                |            |
|------------------------------------------------|------------|
| 4.9. HPLC Chromatograms of compound (5i) ..... | 106        |
| 4.10.HPLC Chromatograms of compound (5j) ..... | 107        |
| 4.11.HPLC Chromatograms of compound(5k) .....  | 108        |
| 4.12.HPLC Chromatograms of compound (5l) ..... | 109        |
| 4.13.HPLC Chromatograms of compound (5m) ..... | 110        |
| 4.14.HPLC Chromatograms of compound (5n) ..... | 111        |
| 4.15.HPLC Chromatograms of compound (5o) ..... | 112        |
| 4.16.HPLC Chromatograms of compound (5p) ..... | 113        |
| 4.17.HPLC Chromatograms of compound (5q) ..... | 114        |
| 4.18.HPLC Chromatograms of compound (5r) ..... | 115        |
| 4.19.HPLC Chromatograms of compound (5s) ..... | 116        |
| 4.20.HPLC Chromatograms of compound (7) .....  | 117        |
| 4.21.HPLC Chromatograms of compound (8) .....  | 117        |
| <b>5. Computational Studies .....</b>          | <b>118</b> |
| <b>6. References .....</b>                     | <b>121</b> |

## 1. General Information

Unless otherwise noted, all reactions were carried out under a nitrogen atmosphere using a *two-necked round-bottomed flask*. All chemicals were purchased from commercial suppliers and either used as received or purified according to *Purification of Common Laboratory Chemicals*.<sup>1</sup> Dry acetonitrile (MeCN) was obtained from an *inert* PS-MD-6 solvent purification system.

Thin layer chromatography was performed on fluorescence indicator marked precoated silica gel 60 plates (*Macherey-Nagel*, ALUGRAM Xtra SIL G/UV<sub>254</sub>) and visualized by UV light (254 nm/366 nm). Flash column chromatography was performed on silica gel (0.040 – 0.063 mm) with the solvents given in the procedures.

NMR spectra were recorded on a *Bruker AVANCE NEO 600 MHz* spectrometer at 25 °C. Chemical shifts for <sup>1</sup>H-NMR spectra are reported as  $\delta$  (parts per million) relative to the residual proton signal of CDCl<sub>3</sub> at 7.26 ppm (s), or DMSO-*d*<sub>6</sub> at 2.50 ppm (quin). Chemical shifts for <sup>13</sup>C-NMR spectra are reported as  $\delta$  (parts per million) relative to the signal of CDCl<sub>3</sub> at 77.0 ppm (t), or DMSO-*d*<sub>6</sub> at 39.5 ppm (sept). The following abbreviations are used to describe splitting patterns: br. = broad, s = singlet, d = doublet, t = triplet, tt = triplet of triplets, q = quartet, sept = septet, m = multiplet. Coupling constants *J* are given in Hertz.

ESI and APCI mass spectra were recorded on an *Advion Expression CMSL via ASAP* probe or direct inlet. High resolution (HR) EI mass spectra were recorded on a double focusing mass spectrometer ThermoQuest MAT 95 XL from *Finnigan MAT*. HR-EI mass spectra were recorded on a *Bruker impact II*. All signals are reported with the quotient from mass to charge *m/z*. APCI mass spectra were recorded on an *Advion Expression CMSL via ASAP* probe or direct inlet. All signals were reported with the quotient from mass to charge *m/z*.

IR spectra were recorded on a *Nicolet Thermo iS10* scientific spectrometer with a diamond ATR unit.

Melting points of solids were measured on a *Büchi M-5600* Melting Point apparatus and are uncorrected. The measurements were performed with a heating rate of 2 °C/min and the melting points are reported in °C.

Low temperature reactions were cooled using a *Julabo* FT902 cryostat. If not otherwise noted, solvents were removed on a *Büchi* Rotavapor R-300 with 40 °C water bath temperature.

HPLC chromatograms were recorded on *Azura Analytical Knauer*. UV detection 2.1 L monitored at different wavelength, *pump P6.1 L*. Used Columns: *Reprosil Chiral- OM*, 5  $\mu\text{m}$  (250x4,6 mm).

Optical rotations were measured on *Anton Paar MCP 150*, in chloroform at 23 °C.

CD-spectra were recorded on a *Jasco J-810 CD-Spectrometer* at 25 °C in chloroform with a concentration of 1.75 m Molar.

## 2. Experimental Section

### 2.1. Synthesis of *N*-(hydroxymethyl)benzamide derivatives (GP1)

Benzamide derivative (1.00 mmol, 1.00 eq.) was dissolved in (5.00 ml) ethanol. A 37% aqueous formaldehyde solution (0.15 mL, 1.50 mmol, 1.50 eq.) and potassium carbonate (138 mg, 1.00 mmol, 1.00 eq.) were added and stirred at 60 °C for 8 h. Extracted three times with dichloromethane and water, and then washed with saturated brine, dried with anhydrous Na<sub>2</sub>SO<sub>4</sub>, evaporation of the solvent, and performed column chromatography using mixture of (DCM: MeOH) to yield the desired product.

#### 2.1.1. Synthesis of 4-bromo-*N*-(hydroxymethyl)benzamide (**a1**)

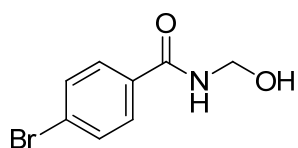

Following GP1, 4-bromo benzamide (200 mg, 1.00 mmol, 1.00 eq.) was dissolved in (5.00 ml) ethanol. Then, a 37% aqueous formaldehyde solution (0.150 mL, 1.50 mmol, 1.50 eq.) and potassium carbonate (138 mg, 1.00 mmol, 1.00 eq.) were added and stirred at 60 °C for 8 h. After work-up and column chromatography (DCM:MeOH 20:1) **a1** (207 mg, 0.900 mmol, 90%) was obtained as a white solid. **Mp**: 137-139 °C. **<sup>1</sup>H NMR (600 MHz, DMSO-*d*<sub>6</sub>)**: δ 9.21 (t, *J* = 6.0 Hz, 1H), 7.92 – 7.87 (m, 2H), 7.58 – 7.52 (m, 2H), 5.70 (t, *J* = 6.8 Hz, 1H), 4.70 (t, *J* = 6.5 Hz, 2H). **<sup>13</sup>C NMR (150 MHz, DMSO-*d*<sub>6</sub>)**: δ 165.6, 136.7, 133.5, 129.7, 128.7, 63.4. **HR-MS (EI, 70 eV)**: calculated for [C<sub>8</sub>H<sub>8</sub>BrNNaO<sub>2</sub>]<sup>+</sup>: *m/z*= 251.9741, found: 251.9744 (Dev.: 0.29 mu; 0.66 ppm). **IR (ATR)**:  $\tilde{\nu}$  (cm<sup>-1</sup>)= 3341, 2976, 2873, 2162, 1646, 1591, 1568, 1533, 1478, 1445, 1385, 1364, 1290, 1147, 1136, 1009, 845, 755, 708.

#### 2.1.2. Synthesis of 4-chloro-*N*-(hydroxymethyl)benzamide (**b1**)

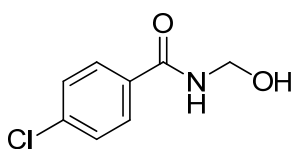

Following GP1, 4-chlorobenzamide (156 mg, 1.00 mmol, 1.00 eq.) was dissolved in (5.00 ml) ethanol. Then, a 37% aqueous formaldehyde solution (0.150 mL, 1.50 mmol, 1.50 eq.) and potassium carbonate (138 mg, 1.00 mmol, 1.00 eq.) were added and stirred at 60 °C for 8 h. After work-up and column chromatography (DCM:MeOH 20:2) **b1** (171 mg, 0.920 mmol, 92%) was obtained as a white solid. **Mp**: 144-146 °C. **<sup>1</sup>H NMR (600 MHz, Chloroform-*d*)**: δ 7.76 – 7.71 (m, 2H), 7.47 – 7.42 (m, 2H), 7.04 (bs, 1H), 4.96 (s, 2H), 3.35 (s, 1H). **<sup>13</sup>C NMR (150 MHz, Chloroform-*d*)**: δ 167.8, 138.6, 131.8, 129.1, 128.5, 65.5. **HR-MS (EI, 70 eV)**: calculated for [C<sub>8</sub>H<sub>8</sub>ClNNaO<sub>2</sub>]<sup>+</sup>: *m/z*= 208.0133, found: 208.0135 (Dev.: 0.25 mu; 1.20 ppm). **IR (ATR)**:  $\tilde{\nu}$  (cm<sup>-1</sup>)= 3338,

3272, 2839, 1638, 1594, 1548, 1311, 1113, 1007, 843, 720, 667. Analytical data is in accordance with literature data.<sup>2</sup>

### 2.1.3. Synthesis of 4-fluoro-*N*-(hydroxymethyl)benzamide (**c1**)

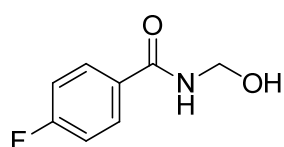

Following GP1, 4-fluorobenzamide (139 mg, 1.00 mmol, 1.00 eq.) was dissolved in (5.00 ml) ethanol. Then, a 37% aqueous formaldehyde solution (0.150 mL, 1.50 mmol, 1.50 eq.) and potassium carbonate (138 mg, 1.00 mmol, 1.00 eq.) were added and stirred at 60 °C for 8 h. After work-up and column chromatography (DCM:MeOH 20:1) **c1** (155 mg, 0.920 mmol, 92%) was obtained as a white solid. **Mp**: 196-198 °C. **<sup>1</sup>H NMR (600 MHz, Chloroform-d)**: δ 7.86 – 7.77 (m, 2H), 7.21 – 7.00 (m, 3H), 4.97 (s, 2H), 3.53 (s, 1H). **<sup>13</sup>C NMR (150 MHz, Chloroform-d)**: δ 167.8, 166.0, 164.3, 129.8, 129.6 (d, J = 9.0 Hz), 115.9 (d, J = 22.0 Hz), 65.4. **<sup>19</sup>F NMR (376 MHz, CDCl<sub>3</sub>)** δ = -118.40. **HR-MS (EI, 70 eV)**: calculated for [C<sub>8</sub>H<sub>8</sub>FNNaO<sub>2</sub>]<sup>+</sup>: m/z= 192.0459, found: 192.0461 (Dev.: 0.19 mu; 0.37 ppm). **IR (ATR):  $\tilde{\nu}$  (cm<sup>-1</sup>)**= 3275, 3114, 2758, 1645, 1590, 1434, 1384, 1004, 852, 747, 680. Analytical data is in accordance with literature data.<sup>3</sup>

### 2.1.4. Synthesis of *N*-(hydroxymethyl)-4-(trifluoromethyl)benzamide (**d1**)

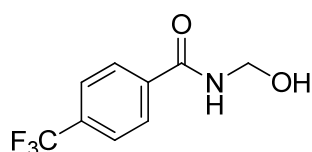

Following GP1, 4-trifluoromethylbenzamide (189 mg, 1.00 mmol, 1.00 eq.) was dissolved in (5.00 ml) ethanol. Then, a 37% aqueous formaldehyde solution (0.150 mL, 1.50 mmol, 1.50 eq.) and potassium carbonate (138 mg, 1.00 mmol, 1.00 eq.) were added and stirred at 60 °C for 8 h. After work-up and column chromatography (DCM:MeOH 20:3) **d1** (195 mg, 0.890 mmol, 89%) was obtained as a white solid. **Mp**: 114-116 °C. **<sup>1</sup>H NMR (600 MHz, DMSO-*d*<sub>6</sub>)**: δ 9.38 (bs, 1H), 8.07 (d, J = 8.5 Hz, 2H), 7.86 (d, J = 7.6 Hz, 2H), 5.80 (bs, 1H), 4.73 (s, 2H). **<sup>13</sup>C NMR (150 MHz, DMSO-*d*<sub>6</sub>)**: δ 165.5, 138.5, 131.8 (d, J = 31.8 Hz), 128.8 (d, J = 19.0 Hz), 125.9 (d, J = 3.6 Hz), 125.3, 123.5, 63.5. **<sup>19</sup>F NMR (376 MHz, DMSO-*d*<sub>6</sub>)** δ = -64.35. **HR-MS (EI, 70 eV)**: calculated for [C<sub>9</sub>H<sub>8</sub>F<sub>3</sub>NNaO<sub>2</sub>]<sup>+</sup>: m/z= 242.0977, found: 242.0981 (Dev.: 0.40 mu; 0.96 ppm). **IR (ATR):  $\tilde{\nu}$  (cm<sup>-1</sup>)**= 3315, 2966, 1651, 1579, 1537, 1509, 1323, 1168, 1126, 1106, 1016, 861, 778, 689.

### 2.1.5. Synthesis of *N*-(hydroxymethyl)-4-methoxybenzamide (**e1**)

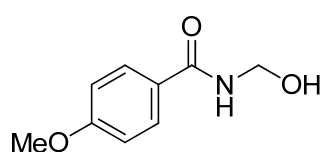

Following GP1, 4-methoxybenzamide (151 mg, 1.00 mmol, 1.00 eq.) was dissolved in (5.00 ml) ethanol. Then, a 37% aqueous formaldehyde solution (0.150 mL, 1.50 mmol, 1.50 eq.) and potassium carbonate (138 mg, 1.00 mmol, 1.00 eq.) were added and stirred at 60 °C for 8 h. After work-up and column chromatography (DCM:MeOH 20:1) **e1** (172 mg, 0.950 mmol, 95%) was obtained as a white solid. **Mp**: 203-205 °C. **<sup>1</sup>H NMR (600 MHz, DMSO-*d*<sub>6</sub>)**: δ 9.01 (bs, 1H), 7.99 – 7.74 (m, 2H), 7.05 – 6.93 (m, 2H), 4.69 (s, 2H), 3.81 (s, 3H). **<sup>13</sup>C NMR (150 MHz, DMSO-*d*<sub>6</sub>)**: δ 165.5, 161.1, 129.0, 126.3, 113.4, 62.7, 55.2. **HR-MS (EI, 70 eV)**: calculated for [C<sub>9</sub>H<sub>11</sub>NNaO<sub>3</sub>]<sup>+</sup>: *m/z*= 204.0714, found: 204.0716 (Dev.: 0.15 mu; 0.33 ppm). **IR (ATR)**:  $\tilde{\nu}$  (cm<sup>-1</sup>)= 3387, 3310, 3163, 2841, 1643, 1606, 1533, 1422, 1248, 1180, 1023, 847, 714, 671. Analytical data is in accordance with literature data.<sup>4</sup>

### 2.1.6. Synthesis of *N*-(hydroxymethyl)-4-nitrobenzamide (**f1**)

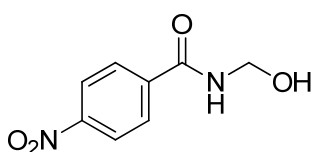

Following GP1, 4-nitrobenzamide (166 mg, 1.00 mmol, 1.00 eq.) was dissolved in (5.00 ml) ethanol. Then, a 37% aqueous formaldehyde solution (0.150 mL, 1.50 mmol, 1.50 eq.) and potassium carbonate (138 mg, 1.00 mmol, 1.00 eq.) were added and stirred at 60 °C for 8 h. After work-up and column chromatography (DCM:MeOH 20:2) **f1** (183 mg, 0.930 mmol, 93%) was obtained as a yellow oil. **<sup>1</sup>H NMR (600 MHz, DMSO *d*<sub>6</sub>)**: δ 9.52 (s, 1H), 8.36 – 8.27 (m, 2H), 8.16 – 8.05 (m, 2H), 7.72 (s, 1H), 4.74 (d, *J* = 3.8 Hz, 2H). **<sup>13</sup>C NMR (150 MHz, DMSO-*d*<sub>6</sub>)**: δ 166.7, 149.5, 1405, 129.4, 123.9, 63.6. **HR-MS (EI, 70 eV)**: calculated for [C<sub>8</sub>H<sub>8</sub>N<sub>2</sub>NaO<sub>4</sub>]<sup>+</sup>: *m/z*= 219.0532, found: 219.0533 (Dev.: 0.12 mu; 0.25 ppm). **IR (ATR)**:  $\tilde{\nu}$  (cm<sup>-1</sup>)= 3370, 3176, 1655, 1623, 1521, 1338, 1144, 1069, 1013, 870, 800, 767, 705.

### 2.1.7. Synthesis of 2-bromo-*N*-(hydroxymethyl)benzamide (**g1**)

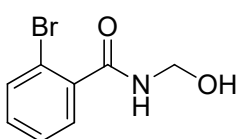

Following GP1, 2-bromobenzamide (200 mg, 1.00 mmol, 1.00 eq.) was dissolved in (5.00 ml) ethanol. Then, a 37% aqueous formaldehyde solution (0.150 mL, 1.50 mmol, 1.50 eq.) and potassium carbonate (138 mg, 1.00 mmol, 1.00 eq.) were added and stirred at 60 °C for 8 h. After work-up and column chromatography (DCM:MeOH 10:1) **g1** (194 mg, 0.840 mmol, 84%) was obtained as a pale-brown solid. **Mp**: 161-163 °C. **<sup>1</sup>H NMR (600 MHz, Chloroform-*d*)**: δ 8.08 (dd, *J* = 7.9, 1.8 Hz, 1H), 7.71 (d, *J* = 8.4 Hz, 1H),

7.59 (d,  $J = 8.8$  Hz, 1H), 7.38 (ddd,  $J = 8.3, 6.9, 1.3$  Hz, 1H), 7.26 (ddd,  $J = 8.3, 7.3, 1.9$  Hz, 1H), 6.90 (s, 1H), 4.83 (d,  $J = 6.6$  Hz, 2H).  **$^{13}\text{C}$  NMR (150 MHz, Chloroform-d):**  $\delta$  167.1, 133.0, 129.4, 126.1, 122.3, 120.2, 111.6, 64.2. **HR-MS (EI, 70 eV):** calculated for  $[\text{C}_8\text{H}_8\text{BrNNaO}_2]^+$ :  $m/z = 251.9755$ , found: 251.9757 (Dev.: 0.21 mu; 0.53 ppm). **IR (ATR):**  $\tilde{\nu}$  ( $\text{cm}^{-1}$ ) = 3320, 2986, 2100, 1642, 1421, 1365, 1240, 1162, 841, 733, 692.

### 2.1.8. Synthesis of 3-bromo-*N*-(hydroxymethyl)benzamide (h1)

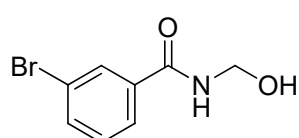

Following GP1, 3-bromobenzamide (200 mg, 1.00 mmol, 1.00 eq.) was dissolved in (5.00 ml) ethanol. Then, a 37% aqueous formaldehyde solution (0.150 mL, 1.50 mmol, 1.50 eq.) and potassium carbonate (138 mg, 1.00 mmol, 1.00 eq.) were added and stirred at 60 °C for 8 h. After work-up and column chromatography (DCM:MeOH 20:3) **h1** (186 mg, 0.810 mmol, 81%) was obtained as a brown solid. **Mp:** 146-148 °C.  **$^1\text{H}$  NMR (600 MHz, Chloroform-d):**  $\delta$  8.52 (s, 1H), 7.74 (d,  $J = 8.2$  Hz, 1H), 7.65 (d,  $J = 8.8$  Hz, 1H), 7.37 (t,  $J = 7.8$  Hz, 1H), 7.21 (s, 1H), 4.95 (d,  $J = 6.5$  Hz, 2H).  **$^{13}\text{C}$  NMR (150 MHz, Chloroform-d):**  $\delta$  167.5, 134.7, 132.6, 131.8, 130.4, 127.5, 122.0, 114.8. **HR-MS (EI, 70 eV):** calculated for  $[\text{C}_8\text{H}_8\text{BrNNaO}_2]^+$ :  $m/z = 251.9754$ , found: 251.9755 (Dev.: 0.11 mu; 0.24 ppm). **IR (ATR):**  $\tilde{\nu}$  ( $\text{cm}^{-1}$ ) = 3299, 3011, 2781, 1640, 1532, 14888, 1420, 1366, 1202, 1007, 922, 836, 741, 694.

### 2.1.9. Synthesis of 2-ethoxy-*N*-(hydroxymethyl)benzamide (i1)

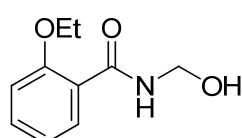

Following GP1, 2-ethoxybenzamide (165 mg, 1.00 mmol, 1.00 eq.) was dissolved in (5.00 ml) ethanol. Then, a 37% aqueous formaldehyde solution (0.150 mL, 1.50 mmol, 1.50 eq.) and potassium carbonate (138 mg, 1.00 mmol, 1.00 eq.) were added and stirred at 60 °C for 8 h. After work-up and column chromatography (DCM:MeOH 5:1) **i1** (162 mg, 0.830 mmol, 83%) was obtained as a white solid. **Mp:** 183-185 °C.  **$^1\text{H}$  NMR (600 MHz, Chloroform-d):**  $\delta$  7.87 (d,  $J = 8.4$  Hz, 1H), 7.74 (d,  $J = 8.9$  Hz, 1H), 7.44 – 7.40 (m, 1H), 7.35 (ddd,  $J = 8.0, 6.9, 1.0$  Hz, 1H), 6.91 (d,  $J = 8.3$  Hz, 1H), 4.98 (d,  $J = 6.6$  Hz, 2H), 4.15 (q,  $J = 7.0$  Hz, 2H), 1.54 (t,  $J = 7.0$  Hz, 3H).  **$^{13}\text{C}$  NMR (150 MHz, Chloroform-d):**  $\delta$  166.5, 165.0, 156.6, 132.6, 120.5, 113.3, 113.1, 63.0, 14.6. **HR-MS (EI, 70 eV):** calculated for  $[\text{C}_{10}\text{H}_{13}\text{NNaO}_3]^+$ :  $m/z = 218.0873$ , found: 218.0874 (Dev.: 0.09 mu; 0.20 ppm). **IR (ATR):**  $\tilde{\nu}$  ( $\text{cm}^{-1}$ ) = 3368, 2785, 2341, 1647, 1520, 1488, 1451, 1321, 1156, 1014, 930, 844, 736.

### 2.1.10. Synthesis of 3,5-dibromo-*N*-(hydroxymethyl)benzamide (**j1**)

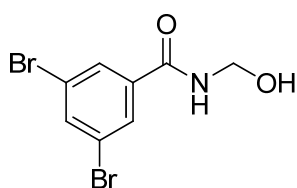

Following GP1, 3,5-dibromobenzamide (279 mg, 1.00 mmol, 1.00 eq.) was dissolved in (5.00 ml) ethanol. Then, a 37% aqueous formaldehyde solution (0.150 mL, 1.50 mmol, 1.50 eq.) and potassium carbonate (138 mg, 1.00 mmol, 1.00 eq.) were added and stirred at 60 °C for 8 h. After work-up and column chromatography (DCM:MeOH 20:3) **j1** (284 mg, 0.920 mmol, 92%) was obtained as a white solid. **Mp**: 219-221 °C. **<sup>1</sup>H NMR (600 MHz, DMSO-*d*<sub>6</sub>)**: δ 9.39 (s, 1H), 8.09 – 8.05 (m, 3H), 4.69 (s, 2H). **<sup>13</sup>C NMR (150 MHz, DMSO-*d*<sub>6</sub>)**: δ 163.8, 138.3, 136.6, 129.8, 123.1, 63.6. **HR-MS (EI, 70 eV)**: calculated for [C<sub>8</sub>H<sub>7</sub>Br<sub>2</sub>NNaO<sub>2</sub>]<sup>+</sup>: *m/z*= 329.8732, found: 329.8735 (Dev.: 0.36 mu; 1.09 ppm). **IR (ATR):  $\tilde{\nu}$  (cm<sup>-1</sup>)**= 3370, 3055, 1622, 1574, 1495, 1335, 1236, 1156, 1117, 1013, 867, 789, 766, 704, 657.

### 2.1.11. Synthesis of *N*-(hydroxymethyl)-3,4,5-trimethoxybenzamide (**k1**)

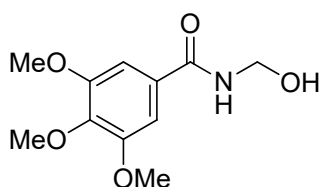

Following GP1, 3,4,5-trimethoxybenzamide (211 mg, 1.00 mmol, 1.00 eq.) was dissolved in (5.00 ml) ethanol. Then, a 37% aqueous formaldehyde solution (0.150 mL, 1.50 mmol, 1.50 eq.) and potassium carbonate (138 mg, 1.00 mmol, 1.00 eq.) were added and stirred at 60 °C for 8 h. After work-up and column chromatography (DCM:MeOH 5:1) **k1** (209 mg, 0.870 mmol, 87%) was obtained as a white solid. **Mp**: 150-152 °C. **<sup>1</sup>H NMR (600 MHz, DMSO-*d*<sub>6</sub>)**: δ 9.10 (t, *J* = 6.2 Hz, 1H), 7.22 (s, 2H), 5.67 (s, 1H), 4.72 (d, *J* = 5.9 Hz, 2H), 3.83 (s, 6H), 3.71 (s, 3H). **<sup>13</sup>C NMR (150 MHz, DMSO-*d*<sub>6</sub>)**: δ 166.0, 153.0, 140.5, 129.9, 105.3, 63.5, 60.5, 56.4. **HR-MS (EI, 70 eV)**: calculated for [C<sub>11</sub>H<sub>15</sub>NNaO<sub>5</sub>]<sup>+</sup>: *m/z*= 264.0841, found: 264.0842 (Dev.: 0.09 mu; 0.35 ppm). **IR (ATR):  $\tilde{\nu}$  (cm<sup>-1</sup>)**= 3269, 2950, 2839, 1642, 1543, 1435, 1230, 1126, 1051, 991, 852, 773, 669.

### 2.1.12. Synthesis of *N*-(hydroxymethyl)picolinamide (**l1**)

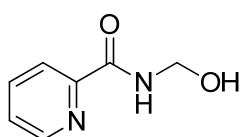

Following GP1, 3,4,5-trimethoxybenzamide (122 mg, 1.00 mmol, 1.00 eq.) was dissolved in (5.00 ml) ethanol. Then, a 37% aqueous formaldehyde solution (0.15 mL, 1.50 mmol, 1.50 eq.) and potassium carbonate (138 mg, 1.00 mmol, 1.00 eq.) were added and stirred at 60 °C for 8 h. After work-up and column chromatography (DCM:MeOH 10:1) **l1** (126 mg, 0.830 mmol, 83%) was obtained as a white solid. **Mp**: 125-127 °C. **<sup>1</sup>H NMR (600 MHz, Chloroform-*d*)**: δ 8.90 (s, 1H), 8.57 (ddd, *J* = 4.8, 1.7, 0.9 Hz, 1H), 8.19 (dt, *J* = 7.8,



1.1 Hz, 1H), 7.86 (td,  $J = 7.7, 1.7$  Hz, 1H), 7.45 (ddd,  $J = 7.6, 4.8, 1.2$  Hz, 1H), 5.02 (d,  $J = 6.8$  Hz, 2H), 3.54 (s, 1H).  **$^{13}\text{C}$  NMR (150 MHz, Chloroform- $d$ )**:  $\delta$  165.8, 149.2, 148.3, 137.4, 126.7, 122.5, 64.7. **HR-MS (EI, 70 eV)**: calculated for  $[\text{C}_7\text{H}_8\text{N}_2\text{NaO}_2]^+$ :  $m/z = 175.0544$ , found: 175.0546 (Dev.: 0.27 mu; 0.59 ppm). **IR (ATR):  $\tilde{\nu}$  ( $\text{cm}^{-1}$ )** = 3394, 3014, 2741, 1644, 1550, 1484, 1457, 1336, 1294, 1147, 948, 926, 801, 738, 695.

## 2.2. Synthesis of *N*-((2-hydroxynaphthalen-1-yl)methyl)benzamide derivatives (GP2)

2-Naphthol derivatives (0.750 mmol, 1.00 eq.) and *N*-(hydroxymethyl)benzamide derivatives (0.750 mmol, 1.00 eq.) were dissolved in anhydrous ethanol (7.50 mL). Concentrated sulfuric acid (1.10 mL) was added dropwise and the reaction mixture was stirred for 7 h at 65 °C. The reaction mixture was cooled to room temperature and washed with (1 M) NaOH solution (10.0 mL), extract three times with EtOAc. Combined organic layers were dried  $\text{Na}_2\text{SO}_4$ , filtered, and concentrated under reduced pressure.

### 2.2.1. Synthesis of *N*-((2-hydroxynaphthalen-1-yl)methyl)benzamide (4a)

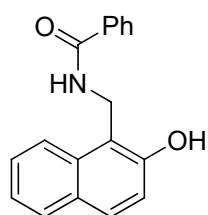

Following GP2, 2-Naphthol (108 mg, 0.750 mmol, 1.00 eq.) and *N*-(hydroxymethyl)benzamide (113 mg, 0.750 mmol, 1.00 eq.) were dissolved in anhydrous ethanol (7.50 mL). Then, conc  $\text{H}_2\text{SO}_4$  (1.10 mL) and the reaction mixture was stirred for 7 h at 65 °C. The product was purified by column chromatography (80:20 Cyclohexane /EtOAc) to furnish **4a** (196 mg, 0.710 mmol, 94%) as a brown solid. **Mp**: 173-175 °C.  **$^1\text{H}$  NMR (600 MHz, DMSO- $d_6$ )**:  $\delta$  10.25 (s, 1H), 9.08 (t,  $J = 5.1$  Hz, 1H), 8.07 (d,  $J = 8.5$  Hz, 1H), 7.87 (d,  $J = 7.9$  Hz, 2H), 7.78 (dd,  $J = 24.2, 8.4$  Hz, 2H), 7.55 – 7.40 (m, 4H), 7.30 (t,  $J = 7.4$  Hz, 1H), 7.18 (d,  $J = 8.8$  Hz, 1H), 4.85 (d,  $J = 5.3$  Hz, 2H).  **$^{13}\text{C}$  NMR (150 MHz, DMSO- $d_6$ )**:  $\delta$  167.4, 153.9, 133.7, 133.4, 131.5, 129.4, 128.4, 128.3, 127.5, 127.4, 126.5, 122.9, 122.7, 119.0, 115.7, 34.5. **HR-MS (APCI)**: calculated for  $[\text{C}_{18}\text{H}_{15}\text{NO}_2]^+$ :  $m/z = 277.1124$ , found: 277.1127 (Dev: 0.37 mu; 0.81 ppm). **IR (ATR):  $\tilde{\nu}$  ( $\text{cm}^{-1}$ )** = 3234, 3102, 1662, 1654, 1265, 947, 844. Analytical data is in accordance with literature data.<sup>5</sup>

## 2.2.2. Synthesis of *N*-((6-bromo-2-hydroxynaphthalen-1-yl)methyl)benzamide

### (4b)

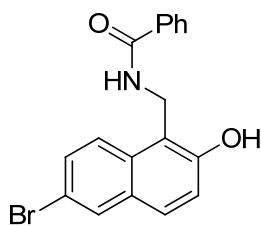

Following GP2, 6-bromonaphthalen-2-ol (167 mg, 0.750 mmol, 1.00 eq.) and *N*-(hydroxymethyl)benzamide (113 mg, 0.750 mmol, 1.00 eq.) were dissolved in anhydrous ethanol (7.50 mL). Then, conc H<sub>2</sub>SO<sub>4</sub> (1.10 mL) and the reaction mixture was stirred for 7 h at 65 °C. The product was purified by column chromatography (85:15 Cyclohexane /EtOAc) to furnish **4b** (234 mg, 0.660 mmol, 88%) as off-white solid. **Mp**: 195-197 °C. **<sup>1</sup>H NMR (600 MHz, Chloroform-d)**: δ 10.21 (s, 1H), 7.94 (d, *J* = 2.0 Hz, 1H), 7.80 – 7.74 (m, 3H), 7.65 (d, *J* = 8.9 Hz, 1H), 7.59 (dd, *J* = 9.0, 2.1 Hz, 1H), 7.55 – 7.50 (m, 1H), 7.43 (t, *J* = 7.8 Hz, 2H), 7.27 (d, *J* = 8.9 Hz, 1H), 7.07 – 7.01 (m, 1H), 4.97 (d, *J* = 6.5 Hz, 2H). **<sup>13</sup>C NMR (150 MHz, Chloroform-d)**: δ 155.0, 132.6, 132.5, 131.6, 131.0, 130.2, 130.1, 129.4, 128.8, 127.2, 122.8, 121.9, 116.6, 115.9, 35.6. **HR-MS (APCI)**: calculated for [C<sub>18</sub>H<sub>14</sub>BrNO<sub>2</sub>]<sup>+</sup>: *m/z* = 355.0278, found: 355.0280 (Dev.: 0.23 mu; 0.64 ppm). **IR (ATR)**:  $\tilde{\nu}$  (cm<sup>-1</sup>) = 3324, 22845, 1644, 1540, 1230, 1007, 874.

## 2.2.3. Synthesis of *N*-((2-hydroxy-7-methoxynaphthalen-1-yl)methyl)benzamide

### (4c)

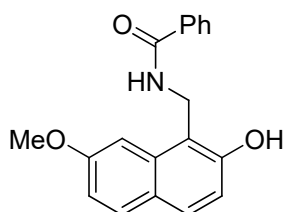

Following GP2, 7-methoxynaphthalen-2-ol (131 mg, 0.750 mmol, 1.00 eq.) and *N*-(hydroxymethyl)benzamide (113 mg, 0.750 mmol, 1.00 eq.) were dissolved in anhydrous ethanol (7.50 mL). Then, conc H<sub>2</sub>SO<sub>4</sub> (1.10 mL) and the reaction mixture was stirred for 7 h at 65 °C. The product was purified by column chromatography (80:20 Cyclohexane /EtOAc) to furnish **4c** (206 mg, 0.670 mmol, 89%) as a brown solid. **Mp**: 150-152 °C. **<sup>1</sup>H NMR (600 MHz, Chloroform-d)**: δ 7.73 (dd, *J* = 17.6, 8.5 Hz, 3H), 7.67 (d, *J* = 8.8 Hz, 1H), 7.50 – 7.46 (m, 1H), 7.43 – 7.36 (m, 2H), 7.23 (d, *J* = 2.1 Hz, 1H), 7.10 (d, *J* = 8.8 Hz, 2H), 7.04 (dd, *J* = 8.8, 2.4 Hz, 1H), 6.97 – 6.88 (m, 1H), 4.96 (d, *J* = 6.5 Hz, 2H), 3.97 (s, 3H). **<sup>13</sup>C NMR (150 MHz, Chloroform-d)**: δ 170.0, 158.7, 155.1, 134.4, 132.3, 130.7, 130.1, 128.7, 127.2, 124.5, 118.0, 113.7, 102.0, 55.6, 35.8, 26.9. **HR-MS (APCI)**: calculated for [C<sub>19</sub>H<sub>17</sub>NO<sub>3</sub>]<sup>+</sup>: *m/z* = 307.1280, found: 307.1281 (Dev.: 0.06 mu; 0.19 ppm). **IR (ATR)**:  $\tilde{\nu}$  (cm<sup>-1</sup>) = 3356, 3041, 1644, 1250, 1024, 962, 845.

#### 2.2.4. Synthesis of *N*-((2,7-dihydroxynaphthalen-1-yl)methyl)benzamide (**4d**)

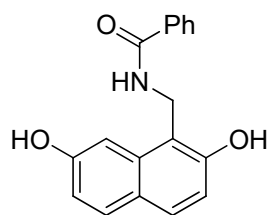

Following GP2, naphthalene-2,7-diol (120 mg, 0.750 mmol, 1.00 eq.) and *N*-(hydroxymethyl)benzamide (113 mg, 0.750 mmol, 1.00 eq.) were dissolved in anhydrous ethanol (7.50 mL). Then, conc H<sub>2</sub>SO<sub>4</sub> (1.10 mL) and the reaction mixture was stirred for 7 h at 65 °C. The product was purified by column chromatography (60:40 Cyclohexane /EtOAc) to furnish **4d** (145 mg, 0.490 mmol, 66%) as a white solid. **Mp:** 211-213 °C. **<sup>1</sup>H NMR (600 MHz, Chloroform-d):** δ 10.23 (s, 1H), 8.02 (dd, *J* = 17.6, 8.5 Hz, 3H), 7.95 (d, *J* = 8.8 Hz, 1H), 7.78 – 7.74 (m, 1H), 7.71 – 7.62 (m, 2H), 7.52 (d, *J* = 2.1 Hz, 1H), 7.38 (d, *J* = 8.8 Hz, 2H), 7.32 (dd, *J* = 8.8, 2.4 Hz, 1H), 5.24 (d, *J* = 6.5 Hz, 2H). **<sup>13</sup>C NMR (150 MHz, Chloroform-d):** δ 167.0, 158.4, 151.0, 134.7, 132.6, 131.0, 130.4, 129.0, 127.5, 124.8, 121.8, 115.2, 114.0, 107.3, 37.7. A signal is missing due to overlap. **HR-MS (APCI)** calculated for [C<sub>18</sub>H<sub>15</sub>NO<sub>3</sub>]<sup>+</sup>: *m/z*= 293.1043, found: 293.1044 (Dev.: 0.13 mu; 0.22 ppm). **IR (ATR):**  $\tilde{\nu}$  (cm<sup>-1</sup>)= 3378, 3246, 1668, 1642, 1345, 1148, 1026, 984.

#### 2.2.5. Synthesis methyl 4-(benzamidomethyl)-3-hydroxy-2-naphthoate (**4e**)

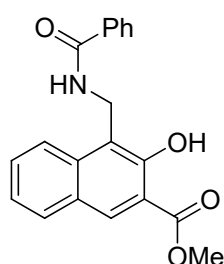

Following GP2, methyl 3-hydroxy-2-naphthoate (152 mg, 0.750 mmol, 1.00 eq.) and *N*-(hydroxymethyl)benzamide (113 mg, 0.750 mmol, 1.00 eq.) were dissolved in anhydrous ethanol (7.50 mL). Then, conc H<sub>2</sub>SO<sub>4</sub> (1.10 mL) and the reaction mixture was stirred for 7 h at 65 °C. The product was purified by column chromatography (75:25 Cyclohexane /EtOAc) to furnish **4e** (226 mg, 0.670 mmol, 90%) as a yellow solid. **Mp:** 183-185 °C. **<sup>1</sup>H NMR (600 MHz, Chloroform-d):** δ 10.97 (s, 1H), 8.51 (s, 1H), 8.28 (d, *J* = 8.6 Hz, 1H), 7.83 (d, *J* = 8.2 Hz, 1H), 7.75 (dd, *J* = 8.3, 1.2 Hz, 2H), 7.63 (ddd, *J* = 8.4, 6.8, 1.3 Hz, 1H), 7.47 – 7.43 (m, 1H), 6.71 (s, 1H), 7.40 – 7.35 (m, 3H), 5.17 (d, *J* = 5.7 Hz, 2H), 4.05 (s, 3H). **<sup>13</sup>C NMR (150 MHz, Chloroform-d):** δ 170.5, 167.1, 154.9, 136.1, 134.6, 132.8, 131.4, 130.1, 130.0, 128.5, 127.1, 127.0, 124.1, 123.3, 118.0, 113.5, 52.8, 34.2. **HR-MS (APCI):** calculated for [C<sub>20</sub>H<sub>17</sub>NO<sub>4</sub>]<sup>+</sup>: *m/z*= 335.1228, found: 335.1230 (Dev.: 0.24 mu; 0.70 ppm). **IR (ATR):**  $\tilde{\nu}$  (cm<sup>-1</sup>)= 3345, 3142, 1663, 1642, 1432, 1145, 980.

### 2.2.6. Synthesis of ethyl 4-(benzamidomethyl)-3-hydroxy-2-naphthoate (4f)

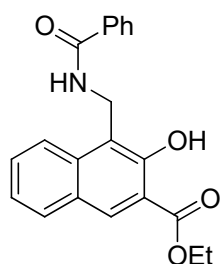

Following GP2, ethyl 3-hydroxy-2-naphthoate (162 mg, 0.750 mmol, 1.00 eq.) and *N*-(hydroxymethyl)benzamide (113 mg, 0.750 mmol, 1.00 eq.) were dissolved in anhydrous ethanol (7.50 mL). Then, conc H<sub>2</sub>SO<sub>4</sub> (1.10 mL) and the reaction mixture was stirred for 7 h at 65 °C. The product was purified by column chromatography (70:30 Cyclohexane /EtOAc) to furnish **4f** (242 mg, 0.690 mmol, 92%) as a white solid. **Mp:** 169-171 °C. **<sup>1</sup>H NMR (600 MHz, Chloroform-d):** δ 8.08 (d, *J* = 1.4 Hz, 2H), 7.57 – 7.53 (m, 1H), 7.54 – 7.49 (m, 3H), 7.48 (d, *J* = 7.8 Hz, 3H), 7.45 – 7.41 (m, 1H), 4.60 (d, *J* = 14.9 Hz, 1H), 4.36 (qt, *J* = 7.1, 3.7 Hz, 2H), 3.97 (d, *J* = 14.9 Hz, 1H), 1.38 (t, *J* = 7.1 Hz, 3H). **<sup>13</sup>C NMR (150 MHz, Chloroform-d):** δ 168.3, 167.1, 160.1, 134.7, 134.2, 131.5, 129.6, 129.1, 128.6, 128.4, 127.3, 126.7, 125.3, 118.2, 114.0, 61.6, 36.8, 14.2. **HR-MS (APCI):** calculated for [C<sub>21</sub>H<sub>19</sub>NO<sub>4</sub>]<sup>+</sup>: *m/z*= 349.1310, found: 349.1312 (Dev.: 0.22 mu; 0.64 ppm). **IR (ATR):**  $\tilde{\nu}$  (cm<sup>-1</sup>)= 3341, 3150, 1654, 1640, 1165, 954.

### 2.2.7. Synthesis of *N*-((2-hydroxy-5,6,7,8-tetrahydronaphthalen-1-yl)methyl)benzamide (4g)

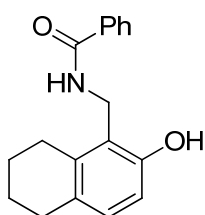

Following GP2, 5,6,7,8-tetrahydronaphthalen-2-ol (111 mg, 0.750 mmol, 1.00 eq.) and *N*-(hydroxymethyl)benzamide (113 mg, 0.750 mmol, 1.00 eq.) were dissolved in anhydrous ethanol (7.50 mL). Then, conc H<sub>2</sub>SO<sub>4</sub> (1.10 mL) and the reaction mixture was stirred for 7 h at 65 °C. The product was purified by column chromatography (90:10 Cyclohexane /EtOAc) to furnish **4g** (189 mg, 0.670 mmol, 90%) as a white solid. **Mp:** 116-118 °C. **<sup>1</sup>H NMR (600 MHz, Chloroform-d):** δ 7.82 – 7.73 (m, 3H), 7.49 – 7.46 (m, 1H), 7.41 (q, *J* = 7.5 Hz, 3H), 7.09 (dt, *J* = 7.8, 5.8 Hz, 1H), 4.62 (dd, *J* = 5.4, 6.2 Hz, 3H), 2.77 (dt, *J* = 7.4, 6.3 Hz, 3H), 1.84 – 1.67 (m, 3H), 1.65 – 1.52 (m, 1H). **<sup>13</sup>C NMR (150 MHz, Chloroform-d):** δ 167.2, 151.5, 136.8, 134.3, 131.5, 128.4, 128.2, 121.5, 110.8, 38.9, 38.4, 36.9, 31.2, 28.4, 24.9. **HR-MS (APCI):** calculated for [C<sub>18</sub>H<sub>19</sub>NO<sub>2</sub>]<sup>+</sup>: *m/z*= 281.1487, found: 281.1488 (Dev.: 0.12 mu; 0.42 ppm). **IR (ATR):**  $\tilde{\nu}$  (cm<sup>-1</sup>)= 3437, 3288, 2921, 1633, 1547, 1486, 1312, 1254, 1028, 1009, 918, 858, 742, 712, 689.

### 2.2.8. Synthesis of 4-bromo-*N*-((2-hydroxynaphthalen-1-yl)methyl)benzamide (4h)

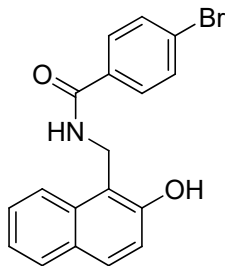

Following GP2, 2-Naphthol (108 mg, 0.750 mmol, 1.00 eq.) and 4-bromo-*N*-(hydroxymethyl)benzamide (173 mg, 0.750 mmol, 1.00 eq.) were dissolved in anhydrous ethanol (7.50 mL). Then, conc H<sub>2</sub>SO<sub>4</sub> (1.10 mL) and the reaction mixture was stirred for 7 h at 65 °C. The product was purified by column chromatography (80:20 Cyclohexane /EtOAc) to furnish **4h** (214 mg, 0.600 mmol,

80%) as a pale-brown solid. **Mp**: 120-122 °C. **<sup>1</sup>H NMR (600 MHz, Chloroform-d)**: δ 10.35 (s, 1H), 8.09 (d, *J* = 7.5 Hz, 1H), 7.94 – 7.88 (m, 3H), 7.80 (d, *J* = 7.4 Hz, 1H), 7.76 – 7.70 (m, 1H), 7.69 – 7.64 (m, 1H), 7.57 – 7.38 (m, 2H), 7.19 (d, *J* = 8.1 Hz, 1H), 7.17 (s, 1H), 511 (d, *J* = 7.0 Hz, 2H). **<sup>13</sup>C NMR (150 MHz, Chloroform-d)**: δ 167.7, 151.1, 133.7, 133.5, 132.7, 132.0, 131.3, 131.1, 130.5, 129.9, 128.3, 123.9, 122.9, 117.6, 117.0, 36.7. **HR-MS (APCI)**: calculated for [C<sub>18</sub>H<sub>14</sub>BrNO<sub>2</sub>]<sup>+</sup>: *m/z* = 355.0361, found: 355.0362 (Dev.: 0.07 mu; 0.18 ppm). **IR (ATR)**:  $\tilde{\nu}$  (cm<sup>-1</sup>) = 3352, 2976, 1646, 1590, 1536, 1313, 1289, 1091, 1009, 845, 755, 699.

### 2.2.9. Synthesis of 4-chloro-*N*-((2-hydroxynaphthalen-1-yl)methyl)benzamide (4i)

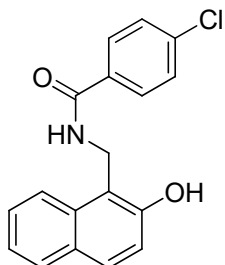

Following GP2, 2-Naphthol (108 mg, 0.750 mmol, 1.00 eq.) and 4-chloro-*N*-(hydroxymethyl)benzamide (127 mg, 0.750 mmol, 1.00 eq.) were dissolved in anhydrous ethanol (7.50 mL). Then, conc H<sub>2</sub>SO<sub>4</sub> (1.10 mL) and the reaction mixture was stirred for 7 h at 65 °C. The product was purified by column chromatography (80:20 Cyclohexane /EtOAc) to furnish **4i** (192 mg, 0.650 mmol,

87%) as a brown solid. **Mp**: 162-164 °C. **<sup>1</sup>H NMR (600 MHz, Chloroform-d)**: δ 9.58 (s, 1H), 8.31 (d, *J* = 8.8 Hz, 2H), 7.98 (d, *J* = 8.8 Hz, 2H), 7.94 (d, *J* = 8.5 Hz, 1H), 7.86 (d, *J* = 8.1 Hz, 1H), 7.82 (d, *J* = 8.9 Hz, 1H), 7.59 (t, *J* = 8.0 Hz, 1H), 7.41 (t, *J* = 7.4 Hz, 1H), 7.30 (d, *J* = 8.9 Hz, 2H), 7.22 (s, 1H). **<sup>13</sup>C NMR (150 MHz, Chloroform-d)**: δ 166.8, 153.2, 148.9, 137.3, 131.8, 129.5, 128.0, 127.3, 126.1, 122.8, 122.1, 119.8, 119.3, 114.0, 34.8. **HR-MS (APCI)**: calculated for [C<sub>18</sub>H<sub>14</sub>ClNO<sub>2</sub>]<sup>+</sup>: *m/z* = 311.0736, found: 311.0738 (Dev.: 0.23 mu; 0.54 ppm). **IR (ATR)**:  $\tilde{\nu}$  (cm<sup>-1</sup>) = 3298, 2874, 1641, 1258, 1140, 964, 833.

## 2.2.10. Synthesis of 4-fluoro-*N*-((2-hydroxynaphthalen-1-yl)methyl)benzamide

(4j)

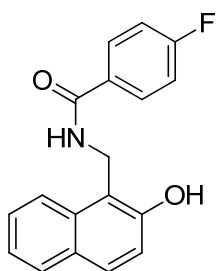

Following GP2, 2-Naphthol (108 mg, 0.750 mmol, 1.00 eq.) and 4-fluoro-*N*-(hydroxymethyl)benzamide (127 mg, 0.750 mmol, 1.00 eq.) were dissolved in anhydrous ethanol (7.50 mL). Then, conc H<sub>2</sub>SO<sub>4</sub> (1.10 mL) and the reaction mixture was stirred for 7 h at 65 °C. The product was purified by column chromatography (85:15 Cyclohexane /EtOAc) to furnish **4j** (192 mg, 0.650 mmol, 87%) as a pale-yellow solid. **Mp**: 156-158 °C. **<sup>1</sup>H NMR (600 MHz, Chloroform-d)**: δ 9.86 (s, 1H), 8.93 (t, *J* = 5.1 Hz, 1H), 7.87 – 7.78 (m, 3H), 7.60 (d, *J* = 8.3 Hz, 3H), 7.57 (d, *J* = 8.8 Hz, 1H), 7.28 – 7.24 (m, 1H), 7.10 (ddd, *J* = 7.9, 6.7, 0.9 Hz, 1H), 7.00 (d, *J* = 8.8 Hz, 1H), 4.69 (d, *J* = 5.1 Hz, 2H). **<sup>13</sup>C NMR (150 MHz, Chloroform-d)**: δ 166.0, 164.3, 162.1, 151.0, 133.1, 131.5, 130.5 (d, *J* = 19.2 Hz), 130.3, 129.6 (d, *J* = 9.6 Hz), 126.4, 126.2, 123.0, 121.6, 115.9 (d, *J* = 21.8 Hz), 113.6, 38.8.

**<sup>19</sup>F NMR (376 MHz, CDCl<sub>3</sub>)** δ = -120.24. **HR-MS (APCI)**: calculated for [C<sub>18</sub>H<sub>14</sub>FNO<sub>2</sub>]<sup>+</sup>: *m/z* = 295.1012, found: 295.1016 (Dev.: 0.43 mu; 0.95 ppm). **IR (ATR):**  $\tilde{\nu}$  (cm<sup>-1</sup>) = 3365, 3009, 1644, 1574, 1330, 1296, 1048, 932, 851.

## 2.2.11. Synthesis of 2-bromo-*N*-((2-hydroxynaphthalen-1-yl)methyl)benzamide

(4k)

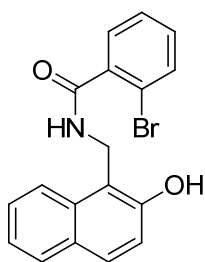

Following GP2, 2-Naphthol (108 mg, 0.750 mmol, 1.00 eq.) and 2-bromo-*N*-(hydroxymethyl)benzamide (173 mg, 0.750 mmol, 1.00 eq.) were dissolved in anhydrous ethanol (7.50 mL). Then, conc H<sub>2</sub>SO<sub>4</sub> (1.10 mL) and the reaction mixture was stirred for 7 h at 65 °C. The product was purified by column chromatography (75:25 Cyclohexane /EtOAc) to furnish **4k** (244 mg, 0.680 mmol, 91%) as a white solid. **Mp**: 172-174 °C. **<sup>1</sup>H NMR (600 MHz, Chloroform-d)**: 9.44 (s, 1H), 8.43 (dd, *J* = 7.9, 1.9 Hz, 1H), 8.06 (d, *J* = 8.4 Hz, 1H), 7.93 (d, *J* = 8.9 Hz, 1H), 7.72 (ddd, *J* = 8.3, 6.9, 1.3 Hz, 1H), 7.63 – 7.59 (m, 1H), 7.54 (ddd, *J* = 8.0, 6.9, 1.0 Hz, 1H), 7.46 (d, *J* = 8.8 Hz, 2H), 7.27 – 7.22 (m, 1H), 7.10 (d, *J* = 8.3 Hz, 1H), 5.17 (d, *J* = 6.6 Hz, 2H). **<sup>13</sup>C NMR (150 MHz, Chloroform-d)**: δ 165.5, 150.5, 144.1, 135.4, 133.1, 123.3, 131.5, 130.5, 130.0, 129.0, 127.8, 126.7, 122.9, 121.4, 119.6, 113.3, 38.6. A signal is missing due to overlap. **HR-MS (APCI)**: calculated for [C<sub>18</sub>H<sub>14</sub>BrNO<sub>2</sub>]<sup>+</sup>: *m/z* = 355.0234,

found: 355.0235 (Dev.: 0.14 mu; 0.32 ppm). **IR (ATR):**  $\tilde{\nu}$  (cm<sup>-1</sup>)= 3341, 2991, 1643, 1544, 1260, 1125, 966, 812.

### 2.2.12. Synthesis of 3-bromo-*N*-((2-hydroxynaphthalen-1-yl)methyl)benzamide (4l)

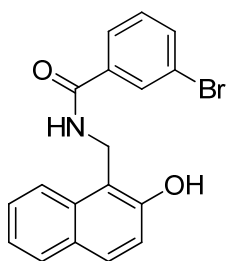

Following GP2, 2-Naphthol (108 mg, 0.750 mmol, 1.00 eq.) and 3-bromo-*N*-(hydroxymethyl)benzamide (173 mg, 0.750 mmol, 1.00 eq.) were dissolved in anhydrous ethanol (7.50 mL). Then, conc H<sub>2</sub>SO<sub>4</sub> (1.10 mL) and the reaction mixture was stirred for 7 h at 65 °C. The product was purified by column chromatography (80:20 Cyclohexane /EtOAc) to furnish **4l** (231 mg, 0.650 mmol, 86%) as off-white solid. **Mp:** 183-185 °C. **<sup>1</sup>H NMR (600 MHz, Chloroform-d):**  $\delta$  9.91 (s, 1H), 9.15 (t, *J* = 7.0 Hz, 1H), 8.21 (s, 1H), 8.07 (d, *J* = 7.8 Hz, 2H), 8.02 (d, *J* = 7.6 Hz, 1H), 7.83 (d, *J* = 7.6 Hz, 2H), 7.79 (d, *J* = 7.5 Hz, 1H), 7.51 – 7.45 (m, 1H), 7.35 – 7.28 (m, 1H), 7.22 (d, *J* = 8.2 Hz, 1H), 4.91 (d, *J* = 8.1 Hz, 2H). **<sup>13</sup>C NMR (150 MHz, Chloroform-d):**  $\delta$  167.4, 151.2, 137.3, 134.5, 133.9, 133.0, 131.1, 130.1, 129.4, 128.9, 126.5, 126.1, 123.1, 122.3, 122.2, 114.7, 37.7. A signal is missing due to overlap. **HR-MS (APCI):** calculated for [C<sub>18</sub>H<sub>14</sub>BrNO<sub>2</sub>]<sup>+</sup>: *m/z*= 355.0216, found: 355.0219 (Dev.: 0.24 mu; 0.54 ppm). **IR (ATR):**  $\tilde{\nu}$  (cm<sup>-1</sup>)= 3312, 2985, 1645, 1425, 1355, 1236, 972, 870.

### 2.2.13. Synthesis of 3,5-dibromo-*N*-((2-hydroxynaphthalen-1-yl)methyl)benzamide (4m)

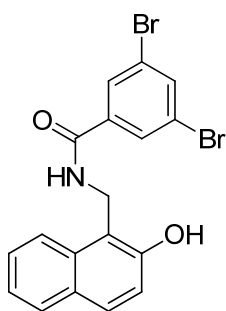

Following GP2, 2-Naphthol (108 mg, 0.750 mmol, 1.00 eq.) and 3,5-dibromo-*N*-(hydroxymethyl)benzamide (232 mg, 0.750 mmol, 1.00 eq.) were dissolved in anhydrous ethanol (7.50 mL). Then, conc H<sub>2</sub>SO<sub>4</sub> (1.10 mL) and the reaction mixture was stirred for 7 h at 65 °C. The product was purified by column chromatography (80:20 Cyclohexane /EtOAc) to furnish **4m** (280 mg, 0.650 mmol, 86%) as a white solid. **Mp:** 176-178 °C. **<sup>1</sup>H NMR (600 MHz, Chloroform-d):**  $\delta$  9.99 (s, 1H), 9.02 (t, *J* = 4.9 Hz, 1H), 8.08 (d, *J* = 1.8 Hz, 2H), 8.00 (t, *J* = 1.8 Hz, 1H), 7.94 (d, *J* = 8.5 Hz, 1H), 7.81 (d, *J* = 7.9 Hz, 1H), 7.77 (d, *J* = 8.8 Hz, 1H), 7.46 (ddd, *J* = 8.3, 6.8, 1.2 Hz, 1H), 7.32 – 7.28 (m, 1H), 7.21 (d, *J* = 8.9 Hz, 1H), 4.87 (d, *J* = 4.9 Hz, 2H). **<sup>13</sup>C NMR (150 MHz, Chloroform-d):**  $\delta$  164.2, 154.2, 137.9, 136.4, 133.9, 129.9, 129.8, 128.8, 128.6, 127.1, 123.2, 123.0, 123.0, 118.9, 115.2,

34.8. **HR-MS (APCI):** calculated for  $[C_{18}H_{13}Br_2NO_2]^+$ :  $m/z= 432.9379$ , found: 432.9385 (Dev.: 0.64 mu; 1.47 ppm). **IR (ATR):**  $\tilde{\nu}$  ( $cm^{-1}$ )= 3341, 3026, 1664, 1641, 1466, 1320, 1174, 1003, 962, 866.

#### 2.2.14. Synthesis of *N*-((2-hydroxynaphthalen-1-yl)methyl)-4-(trifluoromethyl)benzamide (**4n**)

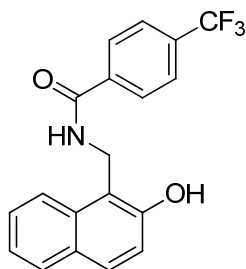

Following GP2, GP2, 2-Naphthol (108 mg, 0.750 mmol, 1.00 eq.) and 4-trifluoromethyl-*N*-(hydroxymethyl)benzamide (164 mg, 0.750 mmol, 1.00 eq.) were dissolved in anhydrous ethanol (7.50 mL). Then, conc  $H_2SO_4$  (1.10 mL) and the reaction mixture was stirred for 7 h at 65 °C. The product was purified by column chromatography (85:15 Cyclohexane /EtOAc) to furnish **4n** (212 mg, 0.610 mmol, 82%) as a white solid. **Mp:** 136-138 °C.  **$^1H$  NMR (600 MHz, DMSO- $d_6$ ):**  $\delta$  10.06 (s, 1H), 9.13 (t,  $J = 5.1$  Hz, 1H), 8.06 (d,  $J = 8.2$  Hz, 2H), 8.01 (d,  $J = 8.5$  Hz, 1H), 7.81 (d,  $J = 8.3$  Hz, 3H), 7.77 (d,  $J = 8.8$  Hz, 1H), 7.47 (ddd,  $J = 8.3, 6.7, 1.3$  Hz, 1H), 7.21 (d,  $J = 8.8$  Hz, 1H), 4.90 (d,  $J = 5.1$  Hz, 2H).  **$^{13}C$  NMR (150 MHz, DMSO- $d_6$ ):**  $\delta$  166.6, 154.2, 138.2, 133.9, 131.7, 131.5, 129.8, 128.9, 128.8 (d,  $J = 14.1$  Hz), 127.0, 125.7 (d,  $J = 3.7$  Hz), 123.2 (d,  $J = 25.5$  Hz), 119.1, 115.6, 55.4, 34.8.  **$^{19}F$  NMR (376 MHz, DMSO- $d_6$ )**  $\delta = -67.96$ . **HR-MS (APCI):** calculated for  $[C_{19}H_{14}F_3NO_2]^+$ :  $m/z= 345.0984$ , found: 345.0986 (Dev.: 0.16 mu; 0.41 ppm). **IR (ATR):**  $\tilde{\nu}$  ( $cm^{-1}$ )= 3214, 2714, 1650, 1322, 1006, 987, 684.

#### 2.2.15. Synthesis of *N*-((2-hydroxynaphthalen-1-yl)methyl)-4-nitrobenzamide (**4o**)

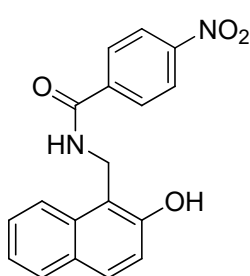

Following GP2, 2-Naphthol (108 mg, 0.750 mmol, 1.00 eq.) and 4-nitro-*N*-(hydroxymethyl)benzamide (147 mg, 0.750 mmol, 1.00 eq.) were dissolved in anhydrous ethanol (7.50 mL). Then, conc  $H_2SO_4$  (1.10 mL) and the reaction mixture was stirred for 7 h at 65 °C. The product was purified by column chromatography (80:20 Cyclohexane /EtOAc) to furnish **4o** (218 mg, 0.680 mmol, 90%) as a off-white solid. **Mp:** 188-190 °C.  **$^1H$  NMR (600 MHz, DMSO- $d_6$ ):**  $\delta$  9.54 (s, 1H), 8.26 (d,  $J = 8.8$  Hz, 2H), 7.94 (d,  $J = 8.8$  Hz, 2H), 7.82 (d,  $J = 8.1$  Hz, 1H), 7.77 (d,  $J = 8.9$  Hz, 1H), 7.54 (t,  $J = 8.0$  Hz, 1H), 7.37 (t,  $J = 7.4$  Hz, 1H), 7.30 – 7.23 (m, 2H), 7.18 (s, 1H), 5.04 (d,  $J = 6.5$  Hz, 2H).  **$^{13}C$  NMR (150 MHz, DMSO- $d_6$ ):**  $\delta$  167.9, 154.3, 150.0, 138.4, 132.9, 130.6, 129.2, 128.5, 127.2, 123.9, 123.3, 120.9, 120.5,



115.1, 35.9. A signal is missing due to overlap. **HR-MS (APCI):** calculated for  $[C_{18}H_{14}N_2O_4]^+$ :  $m/z = 322.0975$ , found: 322.0977 (Dev.: 0.17 mu; 0.42 ppm). **IR (ATR):**  $\tilde{\nu} (cm^{-1}) = 3316, 3074, 1636, 1599, 1489, 1350, 1223, 1157, 1052, 857, 869, 746, 701, 681$ .

### 2.2.16. Synthesis of *N*-((2-hydroxynaphthalen-1-yl)methyl)-4-methoxybenzamide (**4p**)

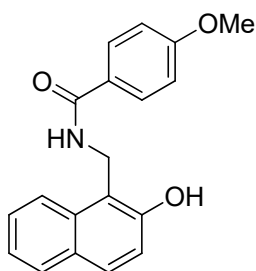

Following GP2, 2-Naphthol (108 mg, 0.750 mmol, 1.00 eq.) and 4-methoxy-*N*-(hydroxymethyl)benzamide (136 mg, 0.750 mmol, 1.00 eq.) were dissolved in anhydrous ethanol (7.50 mL). Then, conc  $H_2SO_4$  (1.10 mL) and the reaction mixture was stirred for 7 h at 65 °C. The product was purified by column chromatography (60:40 Cyclohexane /EtOAc) to furnish **4p** (215 mg, 0.700 mmol, 93%) as a pale-brown solid. **Mp:** 147-149 °C.  **$^1H$  NMR (600 MHz, DMSO- $d_6$ ):**  $\delta$  10.11 (s, 1H), 9.18 (t,  $J = 5.1$  Hz, 1H), 8.10 (d,  $J = 8.2$  Hz, 2H), 8.05 (d,  $J = 8.5$  Hz, 1H), 7.85 (d,  $J = 8.3$  Hz, 3H), 7.82 (d,  $J = 8.8$  Hz, 1H), 7.51 (ddd,  $J = 8.3, 6.7, 1.3$  Hz, 1H), 7.35 (ddd,  $J = 7.9, 6.7, 0.9$  Hz, 1H), 7.25 (d,  $J = 8.8$  Hz, 1H), 4.94 (d,  $J = 5.1$  Hz, 2H), 3.37 (s, 3H).  **$^{13}C$  NMR (150 MHz, DMSO- $d_6$ ):**  $\delta$  162.3, 150.0, 138.4, 133.5, 132.9, 130.6, 129.2, 128.5, 127.2, 125.6, 123.3, 120.9, 120.5, 115.1, 112.3, 55.3, 38.7. **HR-MS (APCI):** calculated for  $[C_{19}H_{17}NO_3]^+$ :  $m/z = 307.1456$ , found: 307.1459 (Dev.: 0.38 mu; 0.70 ppm). **IR (ATR):**  $\tilde{\nu} (cm^{-1}) = 3373, 3060, 1621, 1605, 1499, 1347, 1207, 1071, 860, 750, 730, 671$ .

### 2.2.17. Synthesis of 2-ethoxy-*N*-((2-hydroxynaphthalen-1-yl)methyl)benzamide (**4q**)

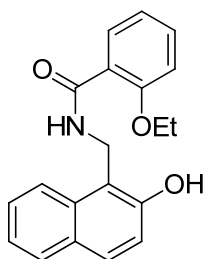

Following GP2, 2-Naphthol (108 mg, 0.750 mmol, 1.00 eq.) and 2-ethoxy-*N*-(hydroxymethyl)benzamide (146 mg, 0.750 mmol, 1.00 eq.) were dissolved in anhydrous ethanol (7.50 mL). Then, conc  $H_2SO_4$  (1.10 mL) and the reaction mixture was stirred for 7 h at 65 °C. The product was purified by column chromatography (70:30 Cyclohexane /EtOAc) to furnish **4q** (220 mg, 0.680 mmol, 90%) as a brown oil.  **$^1H$  NMR (600 MHz, Chloroform- $d$ ):**  $\delta$  9.25 (s, 1H), 8.23 (dd,  $J = 7.9, 1.9$  Hz, 1H), 7.86 (d,  $J = 8.4$  Hz, 1H), 7.80 (d,  $J = 8.1$  Hz, 1H), 7.73 (d,  $J = 8.9$  Hz, 1H), 7.52 (ddd,  $J = 8.3, 6.9, 1.3$  Hz, 1H), 7.43 – 7.39 (m, 1H), 7.34 (ddd,  $J = 8.0, 6.9, 1.0$  Hz, 1H), 7.29 – 7.23 (m, 2H), 7.07 – 7.03 (m, 1H), 6.90 (d,  $J = 8.3$  Hz, 1H), 4.97 (d,  $J$

= 6.6 Hz, 2H), 4.14 (q,  $J = 7.0$  Hz, 2H), 1.54 (t,  $J = 7.0$  Hz, 3H).  **$^{13}\text{C}$  NMR (150 MHz, Chloroform-d)**:  $\delta$  167.7, 157.3, 154.4, 133.6, 133.1, 132.3, 130.0, 129.1, 129.0, 126.7, 122.9, 121.4, 121.0, 120.8, 119.6, 116.5, 112.2, 64.8, 35.1, 14.9. **HR-MS (APCI)**: calculated for  $[\text{C}_{20}\text{H}_{19}\text{NO}_3]^+$ :  $m/z = 321.1542$ , found: 321.1544 (Dev.: 0.16 mu; 0.41 ppm). **IR (ATR)**:  $\tilde{\nu}$  ( $\text{cm}^{-1}$ ) = 3391, 3014, 2841, 1648, 1589, 1477, 1230, 1140, 944, 899.

### 2.2.18. Synthesis of *N*-((2-hydroxynaphthalen-1-yl)methyl)-3,4,5-trimethoxybenzamide (**4r**)

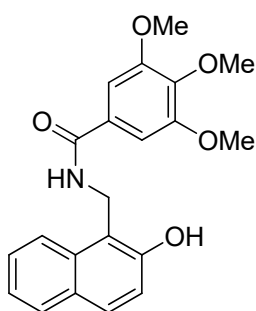

Following GP2, 2-Naphthol (108 mg, 0.750 mmol, 1.00 eq.) and *N*-(hydroxymethyl)-3,4,5-trimethoxybenzamide (181 mg, 0.750 mmol, 1.00 eq.) were dissolved in anhydrous ethanol (7.50 mL). Then, conc  $\text{H}_2\text{SO}_4$  (1.10 mL) and the reaction mixture was stirred for 7 h at 65 °C. The product was purified by column chromatography (60:40 Cyclohexane /EtOAc) to furnish **4r** (225 mg, 0.610 mmol, 82%) as a brown solid. **Mp**: 156-158 °C.

**$^1\text{H}$  NMR (600 MHz, Chloroform-d)**:  $\delta$  10.22 (s, 1H), 8.93 (t,  $J = 5.2$  Hz, 1H), 8.04 (d,  $J = 8.5$  Hz, 1H), 7.81 (d,  $J = 8.0$  Hz, 1H), 7.77 (d,  $J = 8.9$  Hz, 1H), 7.48 (ddd,  $J = 8.3, 6.8, 1.2$  Hz, 1H), 7.31 (ddd,  $J = 7.8, 6.7, 0.8$  Hz, 1H), 7.20 (d,  $J = 8.9$  Hz, 3H), 4.87 (d,  $J = 5.2$  Hz, 2H), 3.80 (s, 6H), 3.68 (s, 3H).  **$^{13}\text{C}$  NMR (150 MHz, Chloroform-d)**:  $\delta$  167.0, 154.3, 153.0, 140.5, 133.9, 129.8, 129.3, 128.8, 128.7, 127.0, 123.3, 123.1, 119.3, 116.0, 105.5, 60.5, 56.5, 34.9. **HR-MS (APCI)**: calculated for  $[\text{C}_{21}\text{H}_{21}\text{NO}_5]^+$ :  $m/z = 367.1491$ , found: 367.1492 (Dev.: 0.13 mu; 0.35 ppm). **IR (ATR)**:  $\tilde{\nu}$  ( $\text{cm}^{-1}$ ) = 3370, 2997, 1623, 1574, 1431, 1235, 1174, 1156, 1119, 1000, 885, 789, 747, 703.

### 2.2.19. Synthesis of *N*-((2-hydroxynaphthalen-1-yl)methyl)picolinamide (**4s**)

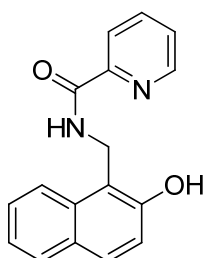

Following GP2, 2-Naphthol (108 mg, 0.750 mmol, 1.00 eq.) and *N*-(hydroxymethyl)picolinamide (114 mg, 0.750 mmol, 1.00 eq.) were dissolved in anhydrous ethanol (7.50 mL). Then, conc  $\text{H}_2\text{SO}_4$  (1.10 mL) and the reaction mixture was stirred for 7 h at 65 °C. The product was purified by column chromatography (85:15 Cyclohexane /EtOAc) to furnish **4s** (162 mg, 0.580 mmol, 78%) as a white solid.

**Mp**: 187-189 °C.  **$^1\text{H}$  NMR (600 MHz, Chloroform-d)**:  $\delta$  10.11 (s, 1H), 9.00 (s, 1H), 8.54 (dd,  $J = 4.3, 2.0$  Hz, 1H), 8.22 (d,  $J = 3.8$  Hz, 1H), 8.19 (d,  $J = 7.9$  Hz, 1H), 7.98 (d,  $J = 8.5$  Hz, 1H), 7.85 (td,  $J = 7.7, 1.6$  Hz, 1H), 7.56 (ddd,  $J = 8.3, 6.9, 1.3$  Hz, 1H),

7.34 (d,  $J = 1.1$  Hz, 1H), 7.32 (dd,  $J = 2.8, 1.0$  Hz, 1H), 7.11 (d,  $J = 2.5$  Hz, 1H), 7.10 (d,  $J = 2.5$  Hz, 1H), 5.02 (d,  $J = 6.9$  Hz, 2H).  $^{13}\text{C}$  NMR (150 MHz, Chloroform-d):  $\delta$  165.7, 151.6, 148.2, 130.2, 129.9, 128.9, 127.8, 126.5, 126.4, 123.6, 123.1, 121.3, 120.6, 118.1, 117.7, 109.5, 26.9. HR-MS (APCI): calculated for  $[\text{C}_{17}\text{H}_{14}\text{N}_2\text{O}_2]^+$ :  $m/z = 278.1035$ , found: 278.1038 (Dev.: 0.26 mu; 0.65 ppm). IR (ATR):  $\tilde{\nu}$  ( $\text{cm}^{-1}$ ) = 3389, 3016, 2871, 1647, 1587, 1339, 1248, 1018, 985, 882.

### 2.3. Synthesis of Spirooxazoline compounds (GP3)

**Racemic products:** To a stirred solution of *N*-((2-Hydroxynaphthalen-1-yl)methyl)benzamide derivatives (0.500 mmol, 1.00 eq.) in MeCN (10.0 mL) was added 2-iodo anisole (0.500 mmol, 1.00 eq.) and *m*-CPBA (75%, 0.750 mmol, 1.50 eq.). The reaction mixture was stirred for 16 hours at room temperature. Then, aqueous  $\text{NaHCO}_3$  solution (10.00 ml) was added and extracted with  $\text{CH}_2\text{Cl}_2$  (15.00 mL x 2) and the organic layer was dried over  $\text{Na}_2\text{SO}_4$ . The solvent was removed under reduced pressure. The product was purified by column chromatography using mixture of (cyclohexane: EtOAc) to yield the desired product.

**Optical Active Products:** To a stirred solution of *N*-((2-Hydroxynaphthalen-1-yl)methyl)benzamide derivatives (0.150 mmol, 1.00 eq.) in MeCN (3.00 mL) was added **6d** (10.0 mol%) and *m*-CPBA (75%, 0.230 mmol, 1.50 eq.). The reaction mixture was stirred for 16 hours at 0 °C. Then, aqueous  $\text{NaHCO}_3$  solution (3.00 ml) was added and extracted with  $\text{CH}_2\text{Cl}_2$  (5.00 mL x 2) and the organic layer was dried over  $\text{Na}_2\text{SO}_4$ . The solvent was removed under reduced pressure. The product was purified by column chromatography using mixture of (cyclohexane: EtOAc) to yield the desired product.

#### 2.3.1. Synthesis of (S)-2'-phenyl-2*H*,4'*H*-spiro[naphthalene-1,5'-oxazol]-2-one (5a)

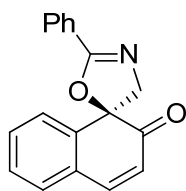

Following GP3, *N*-((2-hydroxynaphthalen-1-yl)methyl)benzamide (39.0 mg, 0.150 mmol, 1.00 eq.) was dissolved in MeCN (3.00 mL). Then, **6d** (9.00 mg, 0.015 mmol, 10 mol%) and *m*-CPBA (52.0 mg, 0.230 mmol, 1.50 eq.) were added and the reaction mixture was stirred for 16 h at 0 °C. The product was purified by column chromatography (80:20 Cyclohexane /EtOAc) to furnish **5a** (34.0 mg, 0.120 mmol, 82%) as a pale-yellow solid. **Mp:** 169-171 °C.  $[\alpha]_D^{23}$ : -3.60 (c 1.0 in  $\text{CHCl}_3$ );  $^1\text{H}$  NMR (600 MHz, Chloroform-d):  $\delta$

8.08 (dt,  $J = 8.5, 1.6$  Hz, 2H), 7.56 – 7.52 (m, 1H), 7.51 – 7.35 (m, 7H), 6.22 (d,  $J = 10.0$  Hz, 1H), 4.49 (d,  $J = 14.7$  Hz, 1H), 4.02 (d,  $J = 14.7$  Hz, 1H).  **$^{13}\text{C}$  NMR (150 MHz, Chloroform- $d$ ):**  $\delta$  197.7, 164.2, 145.7, 142.2, 131.9, 130.9, 129.6, 129.0, 128.9, 128.7, 128.5, 126.9, 125.6, 123.6, 86.5, 69.8. **HR-MS (APCI):** calculated for  $[\text{C}_{18}\text{H}_{13}\text{NO}_2]^+$ :  $m/z = 275.1024$ , found: 275.1108 (Dev.: 0.33 mu; 0.78 ppm). **IR (ATR):**  $\tilde{\nu}$  ( $\text{cm}^{-1}$ ) = 3029, 2847, 1679, 1653, 1395, 1342, 1294, 1065, 1037, 925, 812, 780, 766, 690. Analytical data is in accordance with literature data.<sup>6</sup>

The enantiomeric excess was determined by HPLC analysis on the purified product: Chiracel OM column, 214 nm, 90:10 hexane/*i*-PrOH, 1 mL/min,  $t = 17.26$  min (*major*),  $t = 24.09$  min (*minor*).

### 2.3.2. Synthesis of (S)-6-bromo-2'-phenyl-2*H*,4'*H*-spiro[naphthalene-1,5'-oxazol]-2-one (5b)

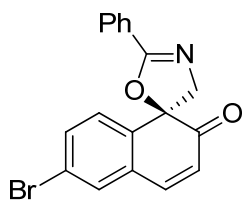

Following GP3, *N*-((6-bromo-2-hydroxynaphthalen-1-yl)methyl) benzamide (53.0 mg, 0.150 mmol, 1.00 eq.) was dissolved in MeCN (3.00 mL). Then, **6d** (9.00 mg, 0.015 mmol, 10 mol%) and *m*-CPBA (52.0 mg, 0.230 mmol, 1.50 eq.) were added and the reaction mixture was stirred for 16 h at 0 °C. The product was purified by column chromatography (85:15 Cyclohexane /EtOAc) to furnish **5b** (49.0 mg, 0.140 mmol, 92%) as a brown solid. **Mp:** 194-196 °C.  **$[\alpha]_{\text{D}}^{23}$ :** -18.5 (c 1.0 in  $\text{CHCl}_3$ );  **$^1\text{H}$  NMR (600 MHz, Chloroform- $d$ ):**  $\delta$  8.05 (dt,  $J = 8.5, 1.7$  Hz, 2H), 7.57 – 7.49 (m, 3H), 7.49 – 7.44 (m, 2H), 7.41 (d,  $J = 10.0$  Hz, 1H), 7.30 (d,  $J = 8.1$  Hz, 1H), 6.25 (d,  $J = 10.0$  Hz, 1H), 4.47 (d,  $J = 14.8$  Hz, 1H), 3.99 (d,  $J = 14.8$  Hz, 1H).  **$^{13}\text{C}$  NMR (150 MHz, Chloroform- $d$ ):**  $\delta$  196.7, 164.0, 143.9, 140.8, 133.4, 132.0, 131.9, 130.7, 128.6, 128.4, 127.1, 126.6, 124.7, 122.7, 86.0, 69.5. **HR-MS (APCI):** calculated for  $[\text{C}_{18}\text{H}_{12}\text{BrNO}_2]^+$ :  $m/z = 353.0121$ , found: 353.0124 (Dev.: 0.22 mu; 0.63 ppm). **IR (ATR):**  $\tilde{\nu}$  ( $\text{cm}^{-1}$ ) = 3348, 3038, 1670, 1600, 1495, 1338, 1265, 1224, 1059, 894, 882, 831, 796, 673.

The enantiomeric excess was determined by HPLC analysis on the purified product: Chiracel OM column, 214 nm, 90:10 hexane/*i*-PrOH, 1.3 mL/min,  $t = 16.27$  min (*minor*),  $t = 26.29$  min (*major*).

### 2.3.3. Synthesis of (S)-7-methoxy-2'-phenyl-2H,4'H-spiro[naphthalene-1,5'-oxazol]-2-one (5c)

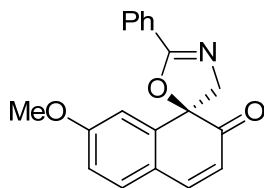

Following GP3, *N*-((2-hydroxy-7-methoxynaphthalen-1-yl)methyl) benzamide (46.0 mg, 0.150 mmol, 1.00 eq.) was dissolved in MeCN (3.00 mL). Then, **6d** (9.00 mg, 0.015 mmol, 10 mol%) and *m*-CPBA (52.0 mg, 0.230 mmol, 1.50 eq.) were added and the reaction mixture was stirred for 16 h at 0 °C. The product was purified by column chromatography (75:25 Cyclohexane /EtOAc) to furnish **5c** (33.0 mg, 0.110 mmol, 72%) as a brown solid. **Mp**: 170-172 °C.  $[\alpha]_D^{23}$ : -10.6 (c 1.0 in CHCl<sub>3</sub>); **<sup>1</sup>H NMR (600 MHz, Chloroform-d)**: δ 8.12 – 8.04 (m, 2H), 7.57 – 7.51 (m, 1H), 7.49 – 7.41 (m, 3H), 7.29 (d, *J* = 8.4 Hz, 1H), 6.96 (d, *J* = 2.6 Hz, 1H), 6.86 (dd, *J* = 8.4, 2.6 Hz, 1H), 6.07 (d, *J* = 9.9 Hz, 1H), 4.48 (d, *J* = 14.7 Hz, 1H), 4.01 (d, *J* = 14.7 Hz, 1H), 3.79 (s, 3H). **<sup>13</sup>C NMR (150 MHz, Chloroform-d)**: δ 197.7, 164.2, 162.0, 145.7, 144.6, 131.8, 131.4, 128.7, 128.5, 126.9, 122.1, 120.9, 113.5, 112.0, 86.6, 70.0, 55.6. **HR-MS (APCI)**: calculated for [C<sub>19</sub>H<sub>15</sub>NO<sub>3</sub>]<sup>+</sup>: *m/z* = 305.1143, found: 305.1144 (Dev.: 0.16 mu; 0.38 ppm). **IR (ATR)**:  $\tilde{\nu}$  (cm<sup>-1</sup>) = 3338, 2978, 2874, 1646, 1568, 1445, 1316, 1291, 1092, 1058, 1010, 895, 784, 754, 674.

The enantiomeric excess was determined by HPLC analysis on the purified product: Chiralcel OM column, 254 nm, 90:10 hexane/*i*-PrOH, 1.0 mL/min, *t* = 13.32 min (*minor*), *t* = 17.19 min (*major*).

### 2.3.4. Synthesis of (S)-7-hydroxy-2'-phenyl-2H,4'H-spiro[naphthalene-1,5'-oxazol]-2-one (5d)

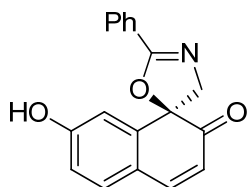

Following GP3, *N*-((2,7-dihydroxynaphthalen-1-yl)methyl) benzamide (46.0 mg, 0.150 mmol, 1.00 eq.) was dissolved in MeCN (3.00 mL). Then, **6d** (9.00 mg, 0.015 mmol, 10 mol%) and *m*-CPBA (52.0 mg, 0.230 mmol, 1.50 eq.) were added and the reaction mixture was stirred for 16 h at 0 °C. The product was purified by column chromatography (85:15 Cyclohexane /EtOAc) to furnish **5d** (24.0 mg, 0.080 mmol, 55%) as a white solid. **Mp**: 193-195 °C.  $[\alpha]_D^{23}$ : -5.00 (c 1.0 in CHCl<sub>3</sub>); **<sup>1</sup>H NMR (600 MHz, Chloroform-d)**: δ 8.41 – 8.35 (m, 2H), 7.87 – 7.81 (m, 1H), 7.80 – 7.71 (m, 3H), 7.59 (d, *J* = 8.4 Hz, 1H), 7.26 (d, *J* = 2.6 Hz, 1H), 7.16 (dd, *J* = 8.4, 2.6 Hz, 1H), 6.38 (d, *J* = 9.9 Hz, 1H), 4.78 (d, *J* = 14.7 Hz, 1H), 4.31 (d, *J* = 14.7 Hz, 1H). **<sup>13</sup>C NMR (150 MHz, Chloroform-d)**: δ 194.0, 164.2, 158.4, 145.7, 139.3, 131.8, 131.4, 129.8, 128.5,

127.9, 126.9, 122.1, 115.1, 112.0, 90.0, 66.3. **HR-MS (APCI):** calculated for  $[C_{18}H_{13}NO_3]^+$ :  $m/z= 291.1032$ , found: 291.1034 (Dev.: 0.23 mu; 0.46 ppm). **IR (ATR):**  $\tilde{\nu} (cm^{-1})= 3368, 3214, 2877, 2684, 1684, 1647, 1433, 1201, 1066, 972, 845, 688$ .

The enantiomeric excess was determined by HPLC analysis on the purified product: Chiracel OM column, 214 nm, 80:20 hexane/*i*-PrOH, 1.0 mL/min,  $t = 19.44$  min (*major*),  $t = 22.20$  min (*minor*).

### 2.3.5. Synthesis of (S)-methyl 2-oxo-2'-phenyl-2H,4'H-spiro[naphthalene-1,5'-oxazole]-3-carboxylate (5e)

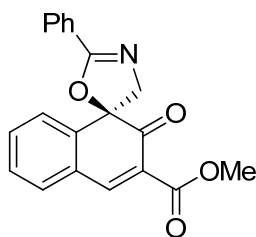

Following GP3, methyl 4-(benzamidomethyl)-3-hydroxy-2-naphthoatemethyl)benzamide (50.0 mg, 0.150 mmol, 1.00 eq.) was dissolved in MeCN (3.00 mL). Then, **6d** (9.00 mg, 0.015 mmol, 10 mol%) and *m*-CPBA (52.0 mg, 0.230 mmol, 1.50 eq.) were added and the reaction mixture was stirred for 16 h at 0 °C. The product was purified by column chromatography (70:30 Cyclohexane /EtOAc) to furnish **5e** (43.0 mg, 0.130 mmol, 86%) as a brown solid. **Mp:** 155-157 °C.  $[\alpha]_D^{23}$ : -22.4 (c 1.0 in  $CHCl_3$ );  **$^1H$  NMR (600 MHz, Chloroform-d):**  $\delta$  8.08 (dt,  $J = 8.5, 1.6$  Hz, 2H), 7.57 – 7.42 (m, 8H), 4.59 (d,  $J = 14.9$  Hz, 1H), 3.97 (d,  $J = 14.9$  Hz, 1H), 3.90 (s, 3H).  **$^{13}C$  NMR (150 MHz, Chloroform-d):**  $\delta$  192.6, 164.4, 164.3, 151.0, 143.6, 132.9, 131.6, 129.2, 128.7, 128.5, 127.4, 126.8, 125.4, 124.9, 88.2, 68.3, 52.6, 26.9. **HR-MS (APCI):** calculated for  $[C_{20}H_{15}NO_4]^+$ :  $m/z= 333.1021$ , found: 333.1023 (Dev.: 0.19 mu; 0.43 ppm). **IR (ATR):**  $\tilde{\nu} (cm^{-1})= 3120, 2914, 1685, 1643, 1421, 1258, 1105, 847, 658$ .

The enantiomeric excess was determined by HPLC analysis on the purified product: Chiracel OM column, 320 nm, 90:10 hexane/*i*-PrOH, 1 mL/min,  $t = 28.78$  min (*minor*),  $t = 36.31$  min (*major*).

### 2.3.6. Synthesis of (S)-2'-phenyl-3-propionyl-2H,4'H-spiro[naphthalene-1,5'-oxazol]-2-one (5f)

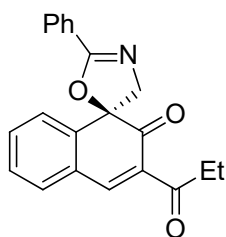

Following GP3, ethyl 4-(benzamidomethyl)-3-hydroxy-2-naphthoate (52.0 mg, 0.150 mmol, 1.00 eq.) was dissolved in MeCN (3.00 mL). Then, **6d** (9.00 mg, 0.015 mmol, 10 mol%) and *m*-CPBA (52.0 mg, 0.230 mmol, 1.50 eq.) were added and the reaction mixture was stirred for 16 h at 0 °C. The product was purified by column chromatography (75:25 Cyclohexane /EtOAc) to furnish **5f** (32.0 mg, 0.090 mmol,

61%) as a brown solid. **Mp:** 150-152 °C.  $[\alpha]_D^{23}$ : -11.4 (c 1.0 in CHCl<sub>3</sub>); **<sup>1</sup>H NMR (600 MHz, Chloroform-d):** δ 8.24 (s, 1H), 8.10 – 8.06 (m, 2H), 7.62 – 7.39 (m, 7H), 4.60 (d, *J* = 14.9 Hz, 1H), 4.36 (qt, *J* = 7.1, 3.7 Hz, 2H), 3.96 (d, *J* = 14.9 Hz, 1H), 1.37 (t, *J* = 7.1 Hz, 3H). **<sup>13</sup>C NMR (150 MHz, Chloroform-d):** δ 192.8, 164.5, 164.1, 150.6, 144.0, 132.9, 132.1, 131.7, 129.3, 128.9, 128.7, 127.6, 126.9, 125.6, 125.4, 88.3, 68.5, 61.8, 14.4. **HR-MS (APCI):** calculated for [C<sub>21</sub>H<sub>17</sub>NO<sub>3</sub>]<sup>+</sup>: *m/z*= 331.1302, found: 331.1305 (Dev.: 0.27 mu; 0.68 ppm). **IR (ATR):**  $\tilde{\nu}$  (cm<sup>-1</sup>)= 3147, 3012, 1662, 1654, 1426, 1399, 1201, 1008, 984, 880, 674.

The enantiomeric excess was determined by HPLC analysis on the purified product: Chiracel OM column, 320 nm, 90:10 hexane/*i*-PrOH, 1 mL/min, *t* = 13.22 min (*minor*), *t* = 17.03 min (*major*).

### 2.3.7. Synthesis of (S)-2'-phenyl-5,6,7,8-tetrahydro-2H,4'H-spiro[naphthalene-1,5'-oxazol]-2-one (5g)

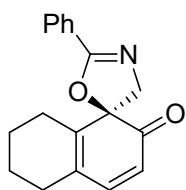

Following GP3, *N*-((2-hydroxy-5,6,7,8-tetrahydronaphthalen-1-yl)methyl)benzamide (43.0 mg, 0.150 mmol, 1.00 eq.) was dissolved in MeCN (3.00 mL). Then, **6d** (9.00 mg, 0.015 mmol, 10 mol%) and *m*-CPBA (52.0 mg, 0.230 mmol, 1.50 eq.) were added and the reaction mixture was stirred for 16 h at 0 °C. The product was purified by column chromatography (85:15 Cyclohexane /EtOAc) to furnish **5g** (36.0 mg, 0.130 mmol, 85%) as a pale-yellow solid. **Mp:** 148-150 °C.  $[\alpha]_D^{23}$ : -12.9 (c 1.0 in CHCl<sub>3</sub>); **<sup>1</sup>H NMR (600 MHz, Chloroform-d):** δ 8.03 – 7.95 (m, 2H), 7.55 – 7.39 (m, 4H), 6.81 (d, *J* = 9.9 Hz, 1H), 6.00 (d, *J* = 9.9 Hz, 1H), 4.25 (d, *J* = 14.7 Hz, 1H), 3.94 (d, *J* = 14.7 Hz, 1H), 2.37 – 2.19 (m, 3H), 1.80 – 1.58 (m, 4H). **<sup>13</sup>C NMR (150 MHz, Chloroform-d):** δ 200.3, 164.3, 157.2, 146.8, 145.3, 131.7, 128.6, 128.4, 127.3, 127.0, 121.7, 87.5, 66.4, 28.6, 23.3, 22.2, 21.5. A signal is missing due to overlap. **HR-MS (APCI):** calculated for [C<sub>18</sub>H<sub>17</sub>NO<sub>2</sub>]<sup>+</sup>: *m/z*= 279.1534, found: 279.1535 (Dev.: 0.11 mu; 0.26 ppm). **IR (ATR):**  $\tilde{\nu}$  (cm<sup>-1</sup>)= 2930, 2859, 1731, 1676, 1494, 1448, 1336, 1247, 1088, 973, 956, 776, 749, 670.

The enantiomeric excess was determined by HPLC analysis on the purified product: Chiracel OM column, 254 nm, 85:15 hexane/*i*-PrOH, 1 mL/min, *t* = 6.28 min (*minor*), *t* = 7.71 min (*major*).

### 2.3.8. Synthesis of (S)-2'-(4-bromophenyl)-2H,4'H-spiro[naphthalene-1,5'-oxazol]-2-one (5h)

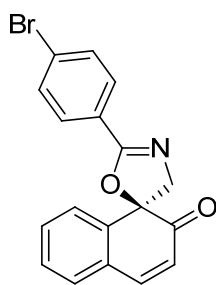

Following GP3, 4-bromo-*N*-((2-hydroxynaphthalen-1-yl)methyl) benzamide (53.0 mg, 0.150 mmol, 1.00 eq.) was dissolved in MeCN (3.00 mL). Then, **6d** (9.00 mg, 0.015 mmol, 10 mol%) and *m*-CPBA (52.0 mg, 0.230 mmol, 1.50 eq.) were added and the reaction mixture was stirred for 16 h at 0 °C. The product was purified by column chromatography (85:15 Cyclohexane /EtOAc) to furnish **5h** (34.0 mg, 0.100 mmol, 64%) as a brown solid. **Mp**: 186-188 °C.  $[\alpha]_D^{23}$ : -11.2 (c 1.0 in CHCl<sub>3</sub>);  $[\alpha]_D^{23}$ : -20.6 (c 1.0 in CHCl<sub>3</sub>); **<sup>1</sup>H NMR (600 MHz, Chloroform-d)**: δ 8.29 (dd, *J* = 8.3, 1.2 Hz, 2H), 7.81 – 7.73 (m, 3H), 7.73 – 7.67 (m, 2H), 7.65 (d, *J* = 10.0 Hz, 1H), 7.54 (d, *J* = 8.1 Hz, 1H), 6.49 (d, *J* = 10.0 Hz, 1H), 4.71 (d, *J* = 14.8 Hz, 1H), 4.23 (d, *J* = 14.8 Hz, 1H). **<sup>13</sup>C NMR (150 MHz, Chloroform-d)**: δ 195.4, 162.6, 142.5, 139.4, 132.0, 130.6, 130.5, 129.3, 127.2, 127.1, 125.8, 125.2, 123.3, 121.3, 84.6, 68.1. **HR-MS (APCI)**: calculated for [C<sub>18</sub>H<sub>12</sub>BrNO<sub>2</sub>]<sup>+</sup>: *m/z* = 353.0078, found: 353.0079 (Dev.: 0.17 mu; 0.44 ppm). **IR (ATR)**:  $\tilde{\nu}$  (cm<sup>-1</sup>) = 3339, 3063, 1651, 1584, 1474, 1286, 1245, 1069, 1011, 967, 876, 844, 746, 686.

The enantiomeric excess was determined by HPLC analysis on the purified product: Chiracel OM column, 320 nm, 90:10 hexane/*i*-PrOH, 1 mL/min, *t* = 10.38 min (*minor*), *t* = 12.92 min (*major*).

### 2.3.9. Synthesis of (S)-2'-(4-chlorophenyl)-2H,4'H-spiro[naphthalene-1,5'-oxazol]-2-one (5i)

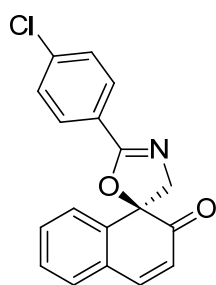

Following GP3, 4-chloro-*N*-((2-hydroxynaphthalen-1-yl)methyl) benzamide (47.0 mg, 0.150 mmol, 1.00 eq.) was dissolved in MeCN (3.00 mL). Then, **6d** (9.00 mg, 0.015 mmol, 10 mol%) and *m*-CPBA (52.0 mg, 0.230 mmol, 1.50 eq.) were added and the reaction mixture was stirred for 16 h at 0 °C. The product was purified by column chromatography (80:20 Cyclohexane /EtOAc) to furnish **5i** (35.0 mg, 0.110 mmol, 75%) as a colorless oil.  $[\alpha]_D^{23}$ : -14.6 (c 1.0 in CHCl<sub>3</sub>);  $[\alpha]_D^{23}$ : -15.9 (c 1.0 in CHCl<sub>3</sub>); **<sup>1</sup>H NMR (600 MHz, Chloroform-d)**: δ 8.10 – 8.00 (m, 2H), 7.52 (d, *J* = 9.9 Hz, 1H), 7.49 – 7.43 (m, 2H), 7.43 – 7.38 (m, 2H), 7.04 – 6.98 (m, 2H), 6.26 (d, *J* = 10.0 Hz, 1H), 4.50 (d, *J* = 14.5 Hz, 1H), 4.03 (d, *J* = 14.5 Hz, 1H). **<sup>13</sup>C NMR (150 MHz, Chloroform-d)**: δ 193.4, 164.1, 139.8, 138.2, 133.3, 132.0, 130.9, 130.5, 129.6,



128.8, 127.2, 125.6, 123.7, 90.8, 66.2. A signal is missing due to overlap. **HR-MS (APCI)**: calculated for  $[C_{18}H_{12}ClNO_2]^+$ :  $m/z = 309.0582$ , found: 309.0584 (Dev.: 0.23 mu; 0.57 ppm). **(ATR):**  $\tilde{\nu} (cm^{-1}) = 3265, 2965, 1648, 1598, 1244, 1160, 1036, 954, 812, 745, 694$ .

The enantiomeric excess was determined by HPLC analysis on the purified product: Chiracel OM column, 214 nm, 85:15 hexane/*i*-PrOH, 1.0 mL/min,  $t = 7.11$  min (*minor*),  $t = 10.87$  min (*major*).

### 2.3.10. Synthesis of (S)-2'-(4-fluorophenyl)-2H,4'H-spiro[naphthalene-1,5'-oxazol]-2-one (5j)

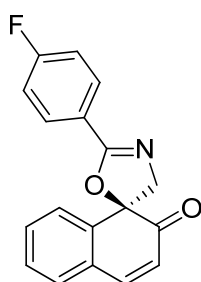

Following GP3, 4-fluoro-*N*-((2-hydroxynaphthalen-1-yl)methyl) benzamide (44.0 mg, 0.150 mmol, 1.00 eq.) was dissolved in MeCN (3.00 mL). Then, **6d** (9.00 mg, 0.015 mmol, 10 mol%) and *m*-CPBA (52.0 mg, 0.230 mmol, 1.50 eq.) were added and the reaction mixture was stirred for 16 h at 0 °C. The product was purified by column chromatography (80:20 Cyclohexane /EtOAc) to furnish **5j** (31.0 mg, 0.110 mmol, 70%) as off-white solid. **Mp**: 166-168 °C.  $[\alpha]_D^{23}$ : -21.7 (c 1.0 in  $CHCl_3$ );  **$^1H$  NMR (600 MHz, Chloroform-d)**:  $\delta$  8.12 – 7.98 (m, 2H), 7.64 (t,  $J = 7.0$  Hz, 2H), 7.51 (dd,  $J = 9.9, 6.9$  Hz, 1H), 7.35 – 7.24 (m, 4H), 6.05 (dd,  $J = 10.0, 5.5$  Hz, 1H), 4.32 (dd,  $J = 15.2, 5.2$  Hz, 1H), 3.86 (dd,  $J = 15.2, 4.9$  Hz, 1H).  **$^{13}C$  NMR (150 MHz, Chloroform-d)**:  $\delta$  195.4, 160.7, 144.6, 139.8, 131.2 (d,  $J = 32.4$  Hz), 130.1, 129.4, 128.8, 128.3, 127.6 (d,  $J = 16.9$  Hz), 127.4, 123.9, 123.1, 121.5, 84.7, 67.9.  **$^{19}F$  NMR (376 MHz,  $CDCl_3$ )**  $\delta = -114.53$ . **HR-MS (APCI)**: calculated for  $[C_{18}H_{12}FNO_2]^+$ :  $m/z = 293.0881$ , found: 293.0883 (Dev.: 0.17 mu; 0.39 ppm). **IR (ATR):**  $\tilde{\nu} (cm^{-1}) = 3387, 3102, 2964, 1684, 1651, 1542, 1436, 1332, 1162, 1008, 922, 722$ .

The enantiomeric excess was determined by HPLC analysis on the purified product: Chiracel OM column, 214 nm, 90:10 hexane/*i*-PrOH, 0.7 mL/min,  $t = 20.21$  min (*major*),  $t = 23.51$  min (*minor*).

### 2.3.11. Synthesis of (S)-2'-(2-bromophenyl)-2H,4'H-spiro[naphthalene-1,5'-oxazol]-2-one (5k)

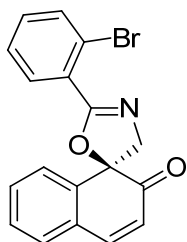

Following GP3, 2-bromo-*N*-((2-hydroxynaphthalen-1-yl)methyl) benzamide (53.0 mg, 0.150 mmol, 1.00 eq.) was dissolved in MeCN (3.00 mL). Then, **6d** (9.00 mg, 0.015 mmol, 10 mol%) and *m*-CPBA (52.0 mg, 0.230 mmol, 1.50 eq.) were added and the reaction mixture was stirred for 16 h at 0 °C. The product was purified by column chromatography (80:20 Cyclohexane /EtOAc) to furnish **5k** (46.0 mg, 0.130 mmol, 87%) as a brown solid. **Mp**: 185-187 °C.  $[\alpha]_D^{23}$ : -23.3 (c 1.0 in CHCl<sub>3</sub>); **<sup>1</sup>H NMR (600 MHz, Chloroform-d)**: δ 8.16 (dd, *J* = 7.8, 1.8 Hz, 1H), 8.05 (t, *J* = 1.7 Hz, 1H), 7.97 – 7.88 (m, 2H), 7.83 (dd, *J* = 7.6, 1.8 Hz, 1H), 7.66 – 7.61 (m, 1H), 7.54 (dt, *J* = 2.1, 1.0 Hz, 1H), 7.04 – 6.98 (m, 2H), 6.30 (d, *J* = 9.9 Hz, 1H), 4.46 (d, *J* = 14.6 Hz, 1H), 4.01 (d, *J* = 14.6 Hz, 1H). **<sup>13</sup>C NMR (150 MHz, Chloroform-d)**: δ 195.5, 168.0, 163.5, 150.5, 139.2, 132.6, 131.8, 131.1, 130.3, 129.4, 129.4, 127.0, 125.2, 124.0, 123.2, 120.0, 87.4, 68.3. **HR-MS (APCI)**: calculated for [C<sub>18</sub>H<sub>12</sub>BrNO<sub>2</sub>]<sup>+</sup>: *m/z* = 353.0120, found: 353.0124 (Dev.: 0.33 mu; 0.95 ppm). **IR (ATR)**:  $\tilde{\nu}$  (cm<sup>-1</sup>) = 3248, 2836, 1657, 1348, 1244, 1062, 933, 842.

The enantiomeric excess was determined by HPLC analysis on the purified product: Chiracel OM column, 214 nm, 90:10 hexane/*i*-PrOH, 1 mL/min, *t* = 12.28 min (*major*), *t* = 15.57 min (*minor*).

### 2.3.12. Synthesis of (S)-2'-(3-bromophenyl)-2H,4'H-spiro[naphthalene-1,5'-oxazol]-2-one (5l)

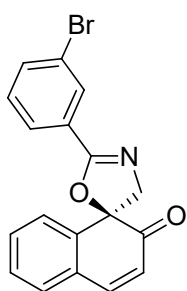

Following GP3, 3-bromo-*N*-((2-hydroxynaphthalen-1-yl)methyl) benzamide (53.0 mg, 0.150 mmol, 1.00 eq.) was dissolved in MeCN (3.00 mL). Then, **6d** (9.00 mg, 0.015 mmol, 10 mol%) and *m*-CPBA (52.0 mg, 0.230 mmol, 1.50 eq.) were added and the reaction mixture was stirred for 16 h at 0 °C. The product was purified by column chromatography (80:20 Cyclohexane /EtOAc) to furnish **5l** (43.0 mg, 0.120 mmol, 81%) as a brown solid. **Mp**: 191-193 °C.  $[\alpha]_D^{23}$ : -14.8 (c 1.0 in CHCl<sub>3</sub>); **<sup>1</sup>H NMR (600 MHz, Chloroform-d)**: δ 8.21 – 8.02 (m, 2H), 7.58 – 7.53 (m, 1H), 7.51 – 7.41 (m, 3H), 7.31 (d, *J* = 8.4 Hz, 1H), 6.98 (d, *J* = 2.6 Hz, 1H), 6.88 (dd, *J* = 8.4, 2.6 Hz, 1H), 6.09 (d, *J* = 9.9 Hz, 1H), 4.49 (d, *J* = 14.7 Hz, 1H), 4.03 (d, *J* = 14.7 Hz, 1H). **<sup>13</sup>C NMR (150 MHz, Chloroform-d)**: δ 164.3, 145.8, 144.7, 138.9, 134.0, 133.1,

131.9, 131.5, 129.6, 128.8, 128.6, 127.0, 125.3, 124.1, 122.2, 121.0, 86.7, 70.1. **HR-MS (APCI)**: calculated for  $[C_{18}H_{12}BrNO_2]^+$ :  $m/z = 353.0121$ , found: 353.0124 (Dev.: 0.30 mu; 0.85 ppm). **IR (ATR)**:  $\tilde{\nu} (cm^{-1}) = 3301, 3014, 2710, 1652, 1588, 1452, 1365, 1112, 930, 851$ .

The enantiomeric excess was determined by HPLC analysis on the purified product: Chiracel OM column, 214 nm, 85:15 hexane/*i*-PrOH, 1 mL/min,  $t = 12.62$  min (*major*),  $t = 15.74$  min (*minor*).

### 2.3.13. Synthesis (S)-2'-(3,5-dibromophenyl)-2H,4'H-spiro[naphthalene-1,5'-oxazol]-2-one (5m)

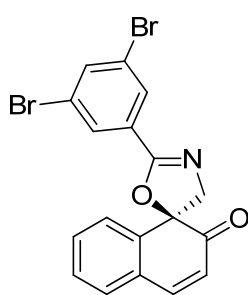

Following GP3, 3,5-dibromo-*N*-((2-hydroxynaphthalen-1-yl)methyl)benzamide (65.0 mg, 0.150 mmol, 1.00 eq.) was dissolved in MeCN (3.00 mL). Then, **6d** (9.00 mg, 0.015 mmol, 10 mol%) and *m*-CPBA (52.0 mg, 0.230 mmol, 1.50 eq.) were added and the reaction mixture was stirred for 16 h at 0 °C. The product was purified by column chromatography (80:20 Cyclohexane /EtOAc) to furnish **5m** (51.0 mg, 0.120 mmol, 79%) as a pale-brown solid. **Mp**: 161-163 °C.  $[\alpha]_D^{23}$ : -13.8 (c 1.0 in  $CHCl_3$ );  **$^1H$  NMR (600 MHz, Chloroform d)**:  $\delta$  8.15 (d,  $J = 1.8$  Hz, 2H), 7.83 (t,  $J = 1.8$  Hz, 1H), 7.50 (d,  $J = 10.0$  Hz, 1H), 7.47 – 7.36 (m, 4H), 6.22 (d,  $J = 10.0$  Hz, 1H), 4.49 (d,  $J = 15.1$  Hz, 1H), 4.02 (d,  $J = 15.1$  Hz, 1H).  **$^{13}C$  NMR (150 MHz, Chloroform-d)**:  $\delta$  197.2, 161.7, 145.9, 141.5, 139.5, 137.2, 131.0, 130.4, 129.8, 129.2, 123.4, 123.1, 111.0, 86.7, 69.6. A signal is missing due to overlap. **HR-MS (APCI)**: calculated for  $[C_{18}H_{11}Br_2NO_2]^+$ :  $m/z = 430.9302$ , found: 430.9304 (Dev.: 0.21 mu; 0.50 ppm). **IR (ATR)**:  $\tilde{\nu} (cm^{-1}) = 3410, 3110, 1685, 1623, 1584, 1446, 1230, 1140, 942, 847, 732$ .

The enantiomeric excess was determined by HPLC analysis on the purified product: Chiracel OM column, 214 nm, 85:15 hexane/*i*-PrOH, 1 mL/min,  $t = 9.48$  min (*minor*),  $t = 10.83$  min (*major*).

### 2.3.14. Synthesis of (S)-2'-(4-(trifluoromethyl)phenyl)-2H,4'H-spiro[naphthalene-1,5'-oxazol]-2-one (5n)

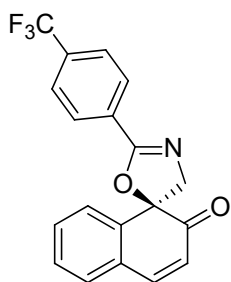

Following GP3, *N*-((2-hydroxynaphthalen-1-yl)methyl)-4-(trifluoromethyl)benzamide (52.0 mg, 0.150 mmol, 1.00 eq.) was dissolved in MeCN (3.00 mL). Then, **6d** (9.00 mg, 0.015 mmol, 10 mol%) and *m*-CPBA (52.0 mg, 0.230 mmol, 1.50 eq.) were added and the reaction mixture was stirred for 16 h at 0 °C. The product was purified by column chromatography (85:15 Cyclohexane /EtOAc) to furnish **5n** (35.0 mg, 0.100 mmol, 68%) as a brown solid. **Mp**: 158-160 °C.  $[\alpha]_D^{23}$ : -16.3 (c 1.0 in CHCl<sub>3</sub>); **<sup>1</sup>H NMR (600 MHz, DMSO-*d*<sub>6</sub>)**: δ 8.13 (d, *J* = 8.0 Hz, 2H), 7.72 (t, *J* = 7.0 Hz, 2H), 7.59 (dd, *J* = 9.9, 6.9 Hz, 1H), 7.45 – 7.32 (m, 4H), 6.13 (dd, *J* = 10.0, 5.5 Hz, 1H), 4.40 (dd, *J* = 15.2, 5.2 Hz, 1H), 3.94 (dd, *J* = 15.2, 4.9 Hz, 1H). **<sup>13</sup>C NMR (150 MHz, DMSO-*d*<sub>6</sub>)**: δ 196.6, 161.9, 145.9, 141.0, 132.4, 132.2, 130.6, 130.1, 129.6, 128.8, 128.7 (d, *J* = 16.9 Hz), 128.5, 125.2, 124.3, 122.8, 86.0, 69.1. **<sup>19</sup>F NMR (376 MHz, DMSO-*d*<sub>6</sub>)** δ = -66.15. **HR-MS (APCI)**: calculated for [C<sub>19</sub>H<sub>12</sub>F<sub>3</sub>NO<sub>2</sub>]<sup>+</sup>: *m/z* = 343.1047, found: 343.1049 (Dev.: 0.16 mu; 0.45 ppm). **IR (ATR)**:  $\tilde{\nu}$  (cm<sup>-1</sup>) = 3402, 3004, 1689, 1652, 1335, 1269, 1025, 935, 841, 774, 651.

The enantiomeric excess was determined by HPLC analysis on the purified product: Chiracel OM column, 214 nm, 93:7 hexane/*i*-PrOH, 1.0 mL/min, *t* = 15.81 min (*major*), *t* = 22.18 min (*minor*).

### 2.3.15. Synthesis of (S)-2'-(4-nitrophenyl)-2H,4'H-spiro[naphthalene-1,5'-oxazol]-2-one (5o)

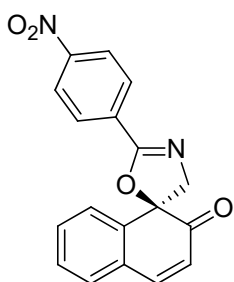

Following GP3, *N*-((2-hydroxynaphthalen-1-yl)methyl)-4-nitrobenzamide (48.0 mg, 0.150 mmol, 1.00 eq.) was dissolved in MeCN (3.00 mL). Then, **6d** (9.00 mg, 0.015 mmol, 10 mol%) and *m*-CPBA (52.0 mg, 0.230 mmol, 1.50 eq.) were added and the reaction mixture was stirred for 16 h at 0 °C. The product was purified by column chromatography (85:15 Cyclohexane /EtOAc) to furnish **5o** (31.0 mg, 0.100 mmol, 65%) as a brown solid. **Mp**: 174-176 °C.  $[\alpha]_D^{23}$ : -10.4 (c 1.0 in CHCl<sub>3</sub>); **<sup>1</sup>H NMR (600 MHz, Chloroform-*d*)**: δ 8.11 – 7.96 (m, 2H), 7.49 (d, *J* = 9.9 Hz, 1H), 7.46 – 7.34 (m, 4H), 7.00 – 6.94 (m, 2H), 6.22 (d, *J* = 10.0 Hz, 1H), 4.46 (d, *J* = 14.5 Hz, 1H), 3.99 (d, *J* = 14.5 Hz, 1H). **<sup>13</sup>C NMR (150 MHz, Chloroform-*d*)**: δ 194.2, 163.8, 149.3, 144.2, 139.6, 133.9, 132.7, 130.3, 129.3, 128.6, 124.0, 123.4,

122.5, 91.0, 68.0. A signal is missing due to overlap. **HR-MS (APCI):** calculated for  $[C_{18}H_{12}N_2O_4]^+$ :  $m/z = 320.0941$ , found: 320.0944 (Dev.: 0.27 mu; 0.60 ppm). **IR (ATR):**  $\tilde{\nu} (cm^{-1}) = 3321, 2935, 1657, 1580, 1325, 1040, 991, 802$ .

The enantiomeric excess was determined by HPLC analysis on the purified product: Chiracel OM column, 320 nm, 90:10 hexane/*i*-PrOH, 1 mL/min,  $t = 10.93$  min (*minor*),  $t = 14.36$  min (*major*).

### 2.3.16. Synthesis of (S)-2'-(4-methoxyphenyl)-2H,4'H-spiro[naphthalene-1,5'-oxazol]-2-one (5p)

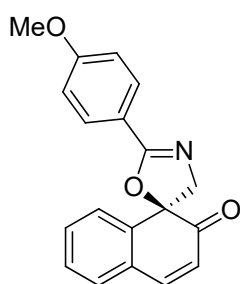

Following GP3, *N*-((2-hydroxynaphthalen-1-yl)methyl)-4-methoxybenzamide (46.0 mg, 0.150 mmol, 1.00 eq.) was dissolved in MeCN (3.00 mL). Then, **6d** (9.00 mg, 0.015 mmol, 10 mol%) and *m*-CPBA (52.0 mg, 0.230 mmol, 1.50 eq.) were added and the reaction mixture was stirred for 16 h at 0 °C. The product was purified by column chromatography (75:25 Cyclohexane /EtOAc) to furnish **5p** (42.0 mg, 0.140 mmol, 92%) as a brown solid. **Mp:** 180-182 °C.  $[\alpha]_D^{23}$ : -17.3 (c 1.0 in  $CHCl_3$ );  **$^1H$  NMR (600 MHz, Chloroform-d):**  $\delta$  8.08 – 7.97 (m, 2H), 7.48 (d,  $J = 9.9$  Hz, 1H), 7.45 – 7.34 (m, 4H), 6.99 – 6.93 (m, 2H), 6.21 (d,  $J = 10.0$  Hz, 1H), 4.45 (d,  $J = 14.5$  Hz, 1H), 3.99 (d,  $J = 14.5$  Hz, 1H), 3.87 (s, 3H).  **$^{13}C$  NMR (150 MHz, Chloroform-d):**  $\delta$  197.9, 164.1, 162.5, 145.6, 142.4, 130.9, 130.5, 129.6, 129.0, 128.8, 125.6, 123.7, 119.4, 113.9, 86.5, 69.7, 55.5. **HR-MS (APCI):** calculated for  $[C_{19}H_{15}NO_3]^+$ :  $m/z = 305.1285$ , found: 305.1288 (Dev.: 0.33 mu; 0.76 ppm). **IR (ATR):**  $\tilde{\nu} (cm^{-1}) = 3345, 3106, 2845, 1680, 1640, 1265, 1104, 934, 900, 831$ .

The enantiomeric excess was determined by HPLC analysis on the purified product: Chiracel OM column, 320 nm, 90:10 hexane/*i*-PrOH, 0.7 mL/min,  $t = 14.48$  min (*minor*),  $t = 15.26$  min (*major*).

### 2.3.17. Synthesis of (S)-2'-(2-ethoxyphenyl)-2H,4'H-spiro[naphthalene-1,5'-oxazol]-2-one (5q)

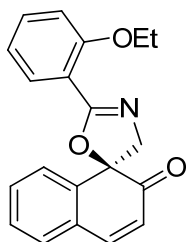

Following GP3, 2-ethoxy-*N*-((2-hydroxynaphthalen-1-yl)methyl) benzamide (48.0 mg, 0.150 mmol, 1.00 eq.) was dissolved in MeCN (3.00 mL). Then, **6d** (9.00 mg, 0.015 mmol, 10 mol%) and *m*-CPBA (52.0 mg, 0.230 mmol, 1.50 eq.) were added and the reaction mixture was stirred for 16 h at 0 °C. The product was purified by column chromatography (70:30 Cyclohexane /EtOAc) to furnish **5q** (41.0 mg, 0.130 mmol, 86%) as a pale-yellow solid. **Mp**: 176-178 °C.  $[\alpha]_D^{23}$ : -8.00 (c 1.0 in CHCl<sub>3</sub>); **<sup>1</sup>H NMR (600 MHz, Chloroform-d)**: δ 8.19 (dd, *J* = 7.8, 1.8 Hz, 1H), 8.08 (t, *J* = 1.7 Hz, 1H), 7.99 – 7.92 (m, 2H), 7.87 (dd, *J* = 7.6, 1.8 Hz, 1H), 7.70 – 7.65 (m, 1H), 7.57 (dt, *J* = 2.1, 1.0 Hz, 1H), 7.06 – 7.01 (m, 2H), 6.33 (d, *J* = 9.9 Hz, 1H), 4.49 (d, *J* = 14.6 Hz, 1H), 4.22 (q, *J* = 6.9 Hz, 2H), 4.04 (d, *J* = 14.6 Hz, 1H), 1.47 (t, *J* = 7.0 Hz, 3H). **<sup>13</sup>C NMR (150 MHz, Chloroform-d)**: δ 194.7, 165.6, 157.2, 140.0, 133.6, 131.8, 130.7, 130.0, 129.8, 128.7, 128.2, 124.3, 123.6, 121.1, 120.4, 112.3, 86.3, 64.8, 64.6, 14.7. **HR-MS (APCI)**: calculated for [C<sub>20</sub>H<sub>17</sub>NO<sub>3</sub>]<sup>+</sup>: *m/z* = 319.1433, found: 319.1437 (Dev.: 0.41 mu; 0.97 ppm). **IR (ATR)**:  $\tilde{\nu}$  (cm<sup>-1</sup>) = 3394, 3104, 2901, 1674, 1452, 1334, 1024, 941, 874, 714.

The enantiomeric excess was determined by HPLC analysis on the purified product: Chiracel OM column, 254 nm, 80:20 hexane/*i*-PrOH, 1 mL/min, *t* = 6.93 min (*major*), *t* = 9.15 min (*minor*).

### 2.3.18. Synthesis of (S)-2'-(3,4,5-trimethoxyphenyl)-2H,4'H-spiro[naphthalene-1,5'-oxazol]-2-one (5r)

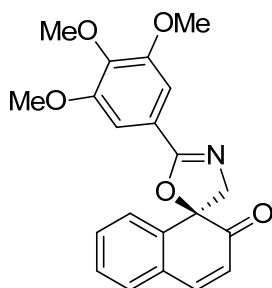

Following GP3, *N*-((2-hydroxynaphthalen-1-yl)methyl)-3,4,5-trimethoxybenzamide (55.0 mg, 0.150 mmol, 1.00 eq.) was dissolved in MeCN (3.00 mL). Then, **6d** (9.00 mg, 0.015 mmol, 10 mol%) and *m*-CPBA (52.0 mg, 0.230 mmol, 1.50 eq.) were added and the reaction mixture was stirred for 16 h at 0 °C. The product was purified by column chromatography (65:35 Cyclohexane /EtOAc) to furnish **5r** (50.0 mg, 0.140 mmol, 91%) as a brown solid. **Mp**: 172-174 °C.  $[\alpha]_D^{23}$ : -20.7 (c 1.0 in CHCl<sub>3</sub>); **<sup>1</sup>H NMR (600 MHz, Chloroform-d)**: δ 7.49 (d, *J* = 10.0 Hz, 1H), 7.47 – 7.41 (m, 2H), 7.41 – 7.35 (m, 2H), 7.32 (s, 2H), 6.22 (d, *J* = 10.0 Hz, 1H), 4.47 (d, *J* = 14.7 Hz, 1H), 4.01 (d, *J* = 14.7 Hz, 1H), 3.90 (s, 9H). **<sup>13</sup>C NMR**

**NMR (150 MHz, Chloroform-d):**  $\delta$  197.7, 164.1, 153.2, 145.7, 142.1, 141.2, 130.9, 129.6, 129.0, 129.0, 125.7, 123.6, 122.1, 105.9, 86.5, 69.8, 61.0, 56.3. **HR-MS (APCI):** calculated for  $[C_{21}H_{19}NO_5]^+$ :  $m/z=$  365.1302, found: 365.1303 (Dev.: 0.12 mu; 0.26 ppm). **IR (ATR):**  $\tilde{\nu}$  ( $cm^{-1}$ )= 3346, 3125, 2871, 1688, 1654, 1447, 1399, 1268, 1164, 943, 877, 801, 685.

The enantiomeric excess was determined by HPLC analysis on the purified product: Chiracel OM column, 254 nm, 90:10 hexane/*i*-PrOH, 1 mL/min,  $t = 9.35$  min (*major*),  $t = 10.73$  min (*minor*).

### 2.3.19. Synthesis of (S)-2'-(pyridin-2-yl)-2H,4'H-spiro[naphthalene-1,5'-oxazol]-2-one (5s)

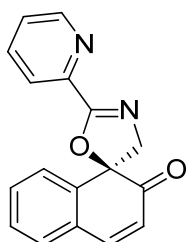

Following GP3, *N*-((2-hydroxynaphthalen-1-yl)methyl)picolinamide (48.0 mg, 0.150 mmol, 1.00 eq.) was dissolved in MeCN (3.00 mL). Then, **6d** (9.00 mg, 0.015 mmol, 10 mol%) and *m*-CPBA (52.0 mg, 0.230 mmol, 1.50 eq.) were added and the reaction mixture was stirred for 16 h at 0 °C. The product was purified by column chromatography (85:15 Cyclohexane /EtOAc) to furnish **5s** (32.0 mg, 0.120 mmol, 82%) as a white solid. **Mp:** 191-193 °C.  $[\alpha]_D^{23}$ : -6.90 (c 1.0 in  $CHCl_3$ );  **$^1H$  NMR (600 MHz, Chloroform-d):**  $\delta$  8.71 (ddd,  $J = 4.8, 1.6, 0.9$  Hz, 1H), 8.37 (dt,  $J = 7.9, 1.0$  Hz, 1H), 8.16 (d,  $J = 8.6$  Hz, 1H), 7.95 (dd,  $J = 7.8, 1.6$  Hz, 1H), 7.92 (d,  $J = 8.8$  Hz, 1H), 7.74 (ddd,  $J = 8.4, 6.9, 1.3$  Hz, 1H), 7.63 – 7.60 (m, 1H), 7.55 – 7.52 (m, 2H), 7.01 (dd,  $J = 8.2, 1.3$  Hz, 1H), 5.20 (d,  $J = 6.9$  Hz, 2H).  **$^{13}C$  NMR (150 MHz, Chloroform-d):**  $\delta$  193.5, 163.9, 148.9, 145.4, 139.5, 137.4, 132.4, 130.8, 129.5, 128.8, 127.0, 123.8, 123.3, 122.5, 89.4, 66.1. **HR-MS (APCI):** calculated for  $[C_{17}H_{12}N_2O_2]^+$ :  $m/z=$  276.0964, found: 276.0964 (Dev.: 0.08 mu; 0.19 ppm). **IR (ATR):**  $\tilde{\nu}$  ( $cm^{-1}$ )= 3392, 3212, 2714, 1690, 1644, 1454, 1381, 1140, 942, 814, 742.

The enantiomeric excess was determined by HPLC analysis on the purified product: Chiracel OM column, 214 nm, 85:15 hexane/*i*-PrOH, 1 mL/min,  $t = 7.22$  min (*minor*),  $t = 9.13$  min (*major*).

## 2.4. Derivatizations

### 2.4.1. Synthesis of (1*S*,2*R*)-2'-phenyl-2*H*,4'*H*-spiro[naphthalene-1,5'-oxazol]-2-ol (7)

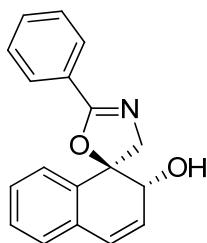

To a solution of **5a** (22.0 mg, 0.080 mmol, 1.00 eq.) and CeCl<sub>3</sub> (5.00 mg, 0.080 mmol, 1.00 eq.) in (4.00 mL) of a mixture solution of MeOH:THF (1:1) was added NaBH<sub>4</sub> (4.00 mg, 0.080 mmol, 1.00 eq.) at -78 °C. The reaction mixture was stirred for 20 min, then diluted with EtOAc (5.00 mL), washed with 1M HCl, dried over Na<sub>2</sub>SO<sub>4</sub> and evaporate the solvent under reduced pressure. The product was purified by column chromatography (80:20 Cyclohexane /EtOAc) to furnish **7** (19.0 mg, 0.070 mmol, 86%) as off-white solid. **Mp**: 188-190 °C.  $[\alpha]_D^{23}$ : -18.33 (c 1.0 in CHCl<sub>3</sub>); **<sup>1</sup>H NMR (600 MHz, Chloroform-d)**: δ 7.90 (d, *J* = 8.2 Hz, 1H), 7.84 – 7.75 (m, 3H), 7.57 – 7.48 (m, 2H), 7.47 – 7.39 (m, 2H), 7.36 (dd, *J* = 12.6, 5.9 Hz, 3H), 7.07 (bs, 1H), 5.08 – 4.96 (m, 2H), 4.71 (d, *J* = 7.4 Hz, 1H). **<sup>13</sup>C NMR (150 MHz, Chloroform-d)**: δ 170.0, 154.5, 132.3, 130.3, 129.1, 128.8, 128.6, 127.2, 125.6, 123.0, 121.0, 120.7, 115.7, 99.7, 35.7, 30.3. **HR-MS (APCI)**: calculated for [C<sub>18</sub>H<sub>15</sub>NO<sub>2</sub>]<sup>+</sup>: *m/z*= 277.0642, found: 277.0644 (Dev.: 0.23 mu; 0.52 ppm). **IR (ATR)**:  $\tilde{\nu}$  (cm<sup>-1</sup>)= 3411, 3145, 2632, 1661, 1642, 1366, 1185, 965, 830, 702.

The enantiomeric excess was determined by HPLC analysis on the purified product: Chiracel OM column, 254 nm, 90:10 hexane/*i*-PrOH, 1 mL/min, *t* = 12.82 min (*minor*), *t* = 19.54 min (*major*). The suggested relative stereochemistry is based on an NOE-Experiment showing no cross peaks between the oxazolines methylene protons 5.08 – 4.96 ppm) and the tertiary proton of the 2-naphthalenone (4.71 ppm).

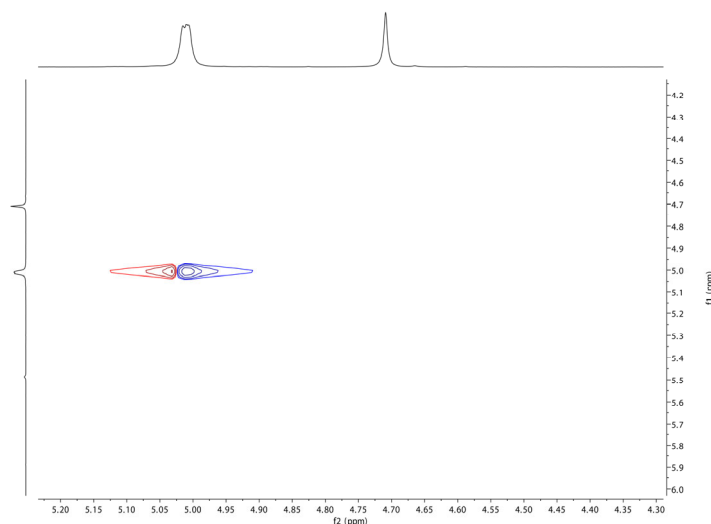



#### 2.4.2. Synthesis of (S)-2'-phenyl-2H,4'H-spiro[benzo[d]oxepine-1,5'-oxazol]-2-one (8)

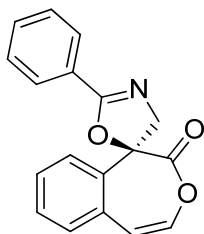

To a solution of **5a** (22.0 mg, 0.080 mmol, 1.00 eq.) dissolved in DCM (0.4 mL) was added phosphate buffer (pH = 7.00, 0.4 mL) and *m*-CPBA (28.0 mg, 0.080 mmol, 1.00 eq.). The reaction mixture was stirred at room temperature for 4 h at -78 °C. Then, diluted with Et<sub>2</sub>O (5.00 mL) and quenched with aqueous Na<sub>2</sub>S<sub>2</sub>O<sub>3</sub> and extract with Et<sub>2</sub>O (2x 5), washed with brine. dried over Na<sub>2</sub>SO<sub>4</sub> and evaporate the solvent under reduced pressure. The product was purified by column chromatography (90:10 Cyclohexane /EtOAc) to furnish **8** (14.7 mg, 0.050 mmol, 63%) as colorless oil.

**[α]<sub>D</sub><sup>23</sup>**: -23.82 (c 1.0 in CHCl<sub>3</sub>); **<sup>1</sup>H NMR (600 MHz, Chloroform-d)**: δ 7.90 (dd, *J* = 8.2, 1.2 Hz, 2H), 7.39 – 7.34 (m, 1H), 7.34 – 7.26 (m, 4H), 7.24 (dd, *J* = 6.6, 2.0 Hz, 1H), 7.23 – 7.17 (m, 2H), 6.04 (d, *J* = 10.0 Hz, 1H), 4.31 (d, *J* = 14.7 Hz, 1H), 3.84 (d, *J* = 14.7 Hz, 1H). **<sup>13</sup>C NMR (150 MHz, Chloroform-d)**: δ 167.9, 165.7, 138.9, 136.9, 130.3, 130.1, 129.5, 128.9, 128.5, 128.0, 127.5, 126.7, 126.6, 112.2, 94.0, 67.0. **HR-MS (APCI)**: calculated for [C<sub>18</sub>H<sub>13</sub>NO<sub>3</sub>]<sup>+</sup>: *m/z* = 291.0842, found: 291.0841 (Dev.: 0.18 mu; 0.47 ppm). **IR (ATR)**:  $\tilde{\nu}$  (cm<sup>-1</sup>) = 3241, 3015, 2744, 2480, 1653, 1455, 1268, 1102, 866, 714.

The enantiomeric excess was determined by HPLC analysis on the purified product: Chiracel OM column, 214 nm, 90:10 hexane/*i*-PrOH, 1 mL/min, *t* = 10.43 min (*minor*), *t* = 11.41 min (*major*).

#### 2.4.3. Synthesis of (Z)-3-(2-(2-phenyloxazol-5-yl)phenyl)acrylaldehyde (9)

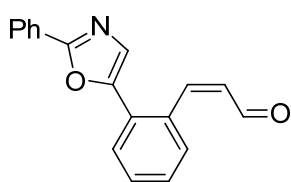

**5a** (27.0 mg, 0.100 mmol, 1.00 eq.) was dissolved in DCM (2.00 mL) and irradiate by UV lamp 350 nm for 2 h. After evaporating the solvent under reduced pressure. The product **9** isolated (26.5 mg, 0.100 mmol, 98%) as a yellow oil.

**<sup>1</sup>H NMR (600 MHz, Chloroform-d)**: δ 9.16 (d, *J* = 10.3 Hz, 1H), 8.16 (d, *J* = 7.2 Hz, 2H), 7.99 (d, *J* = 8.4 Hz, 1H), 7.70 – 7.64 (m, 2H), 7.57 (t, *J* = 7.7 Hz, 2H), 7.51 (d, *J* = 8.8 Hz, 2H), 7.35 (t, *J* = 8.0 Hz, 1H), 6.66 (d, *J* = 9.6 Hz, 1H). **<sup>13</sup>C NMR (150 MHz, Chloroform-d)**: δ 195.1, 157.9, 143.5, 141.8, 133.7, 131.6, 129.8, 129.7, 129.2, 129.0, 128.7, 128.5, 127.4, 126.9, 126.1, 120.3. **HR-MS (APCI)**: calculated for

[C<sub>18</sub>H<sub>13</sub>NO<sub>2</sub>]<sup>+</sup>: m/z= 275.0955, found: 275.0953 (Dev.: 0.28 mu; 0.62 ppm). **IR (ATR):**  
 $\tilde{\nu}$  (cm<sup>-1</sup>)= 3310, 3124, 2842, 2455, 1641, 1510, 1320, 1144, 976, 850.

### 3. NMR Spectra for New Compounds

### 3.1. NMR of 4-bromo-N-(hydroxymethyl)benzamide (a1) in DMSO-d<sub>6</sub>

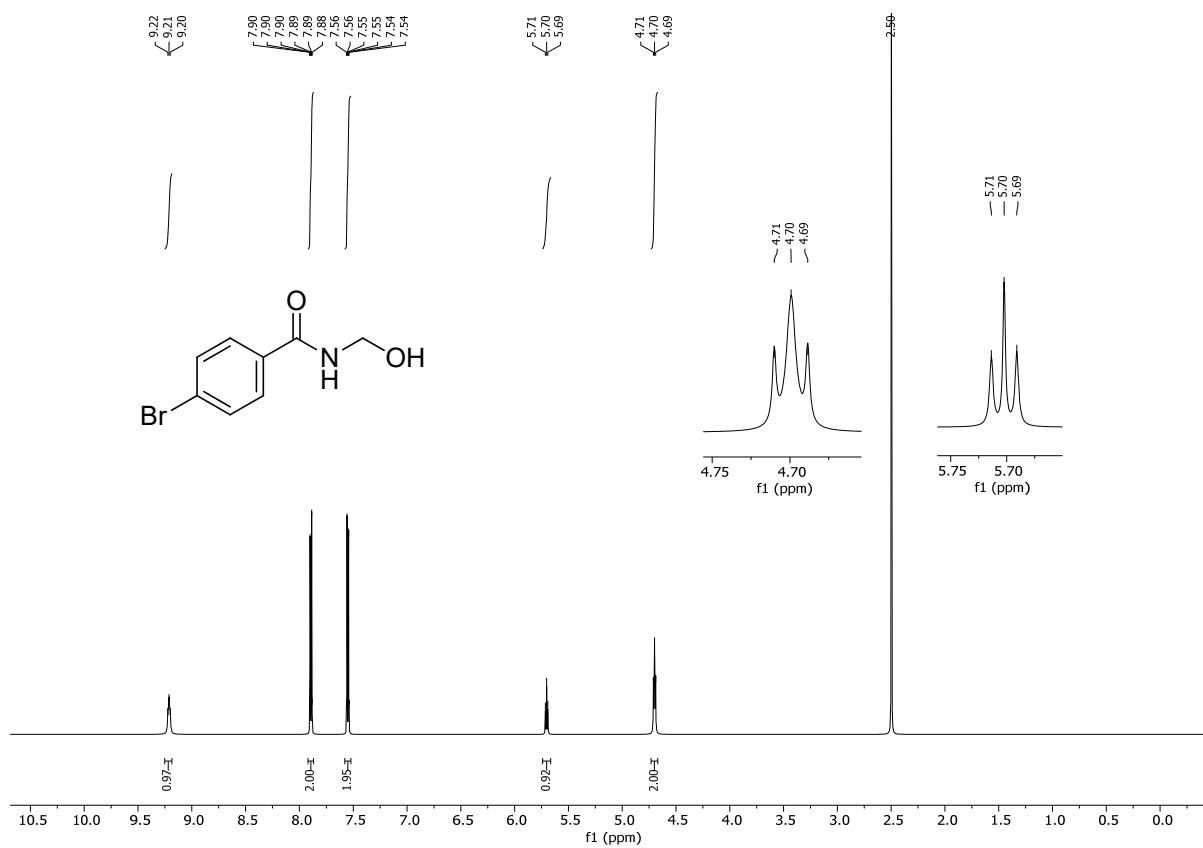

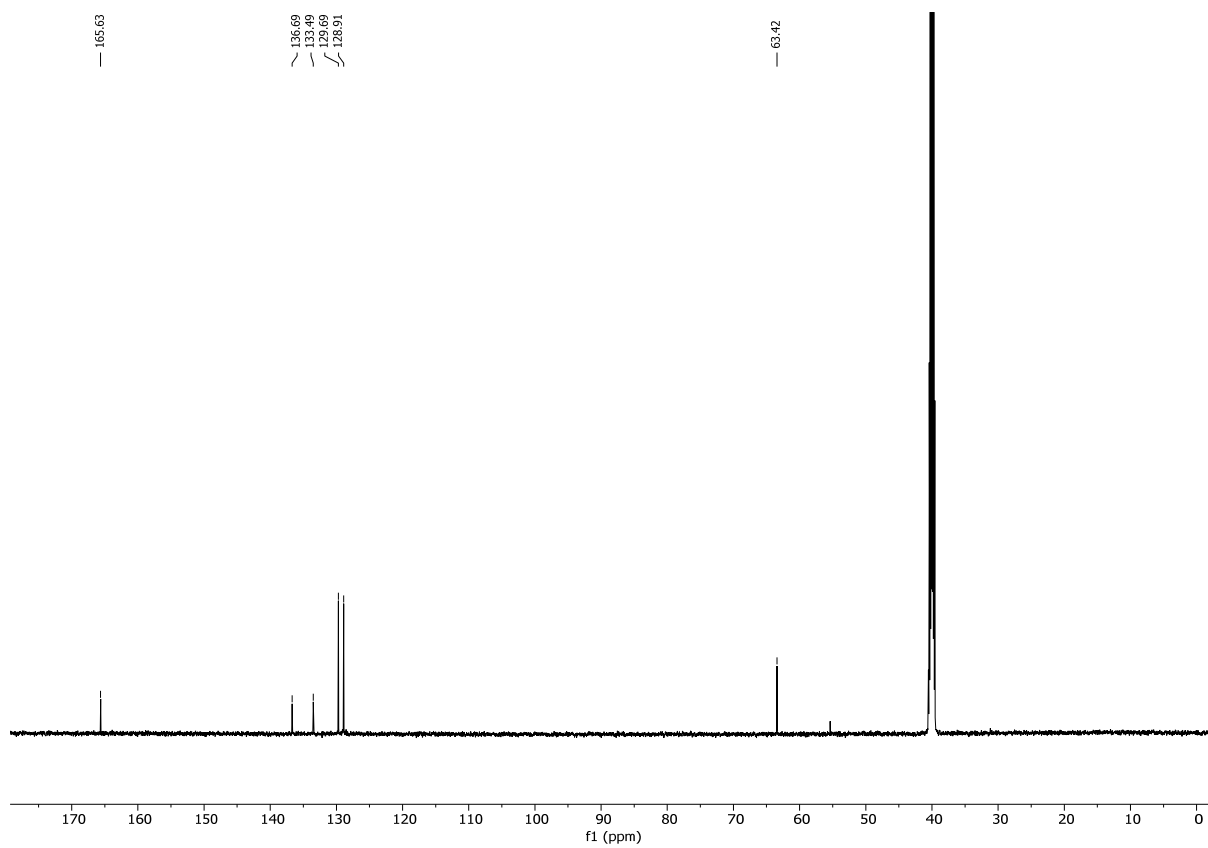

### 3.2.NMR of 4-chloro-N-(hydroxymethyl)benzamide (b1) in CDCl<sub>3</sub>

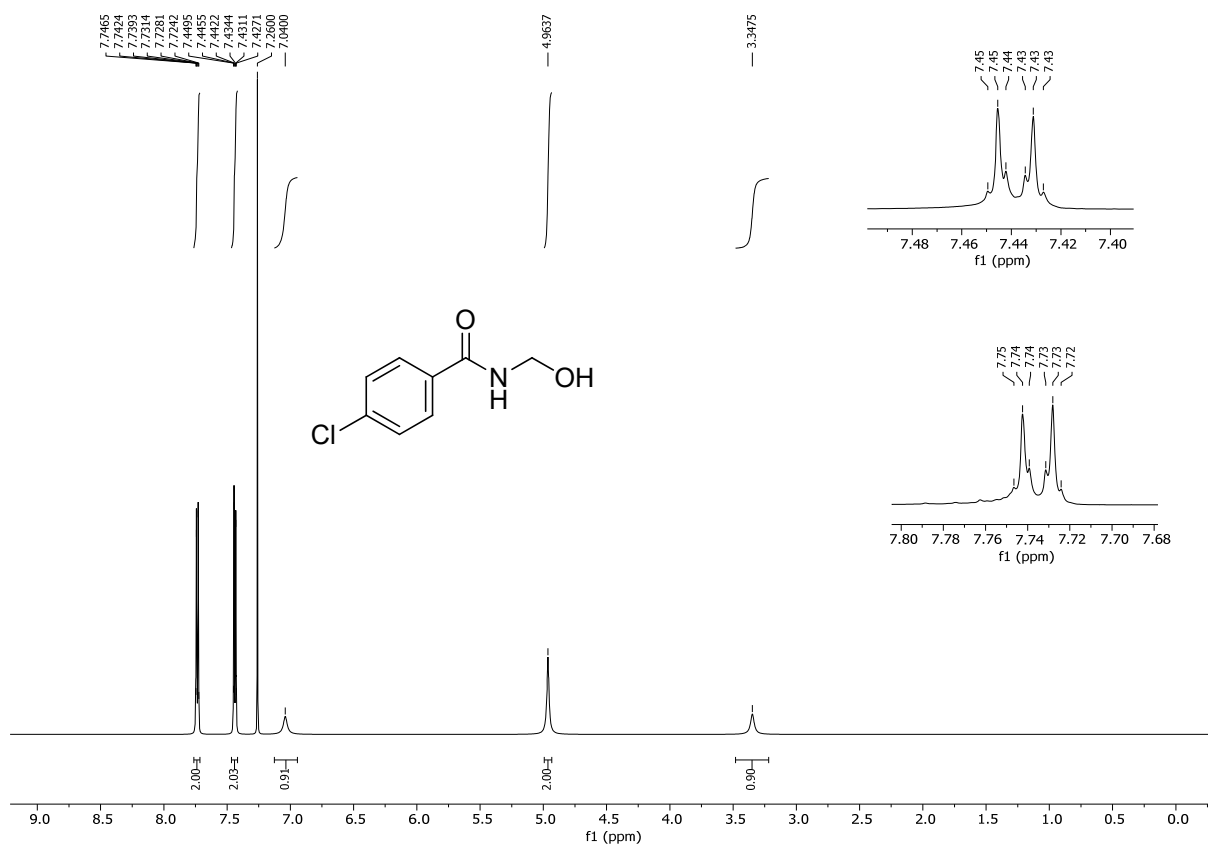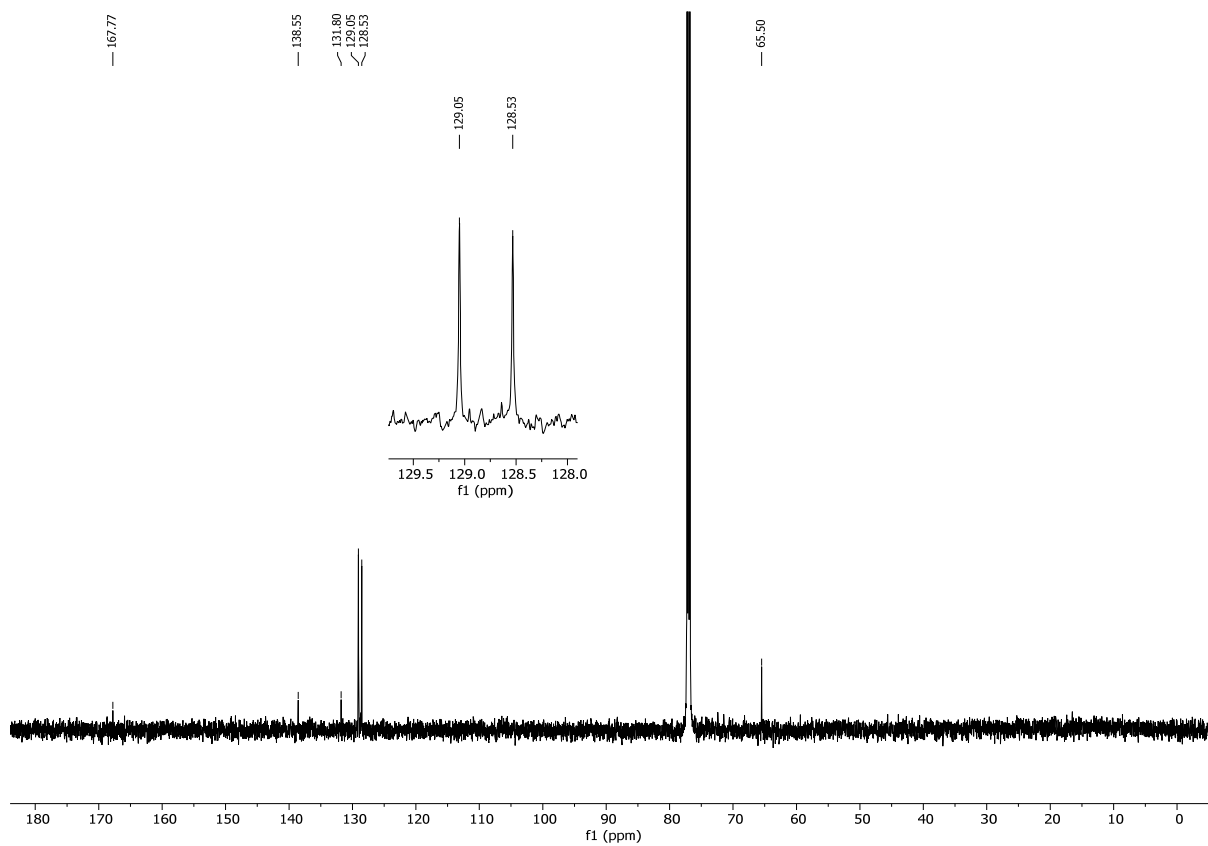

### 3.3. NMR of 4-fluoro-*N*-(hydroxymethyl)benzamide (c1) in CDCl<sub>3</sub>

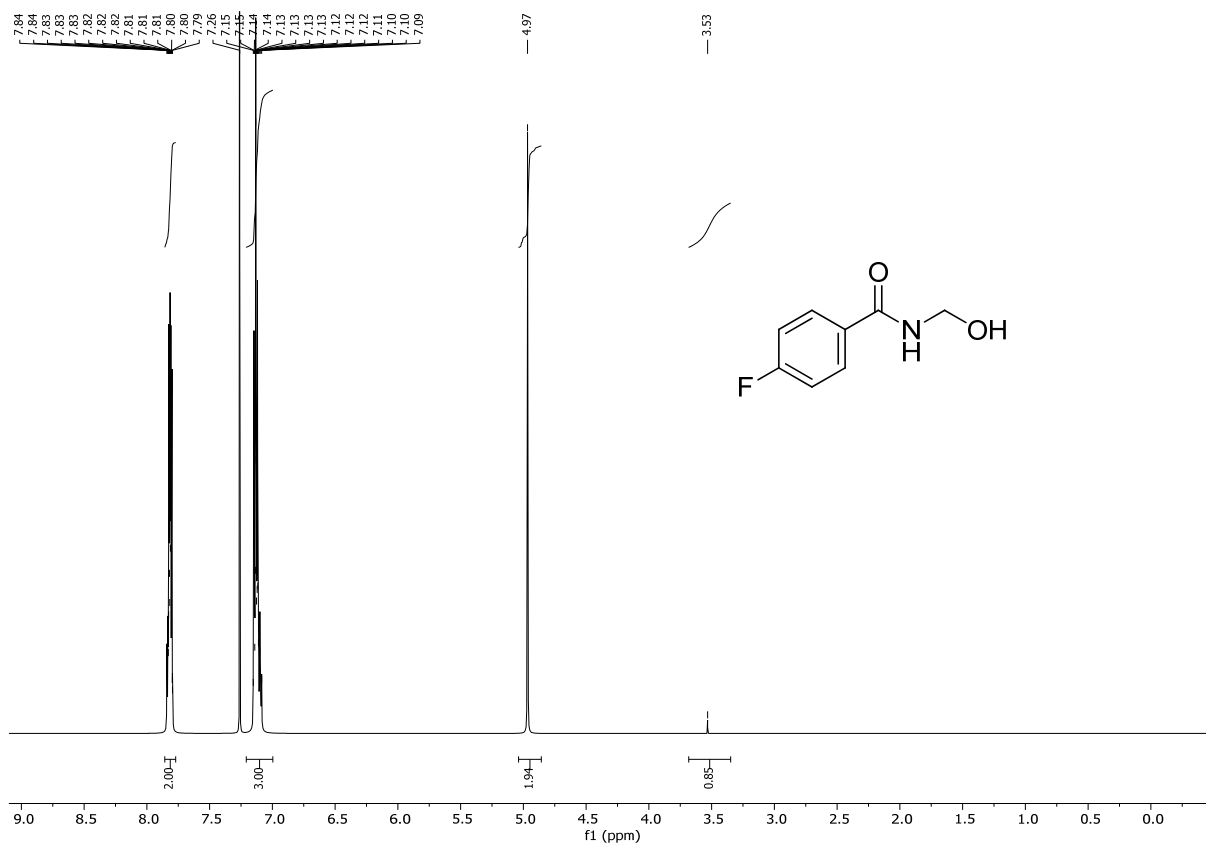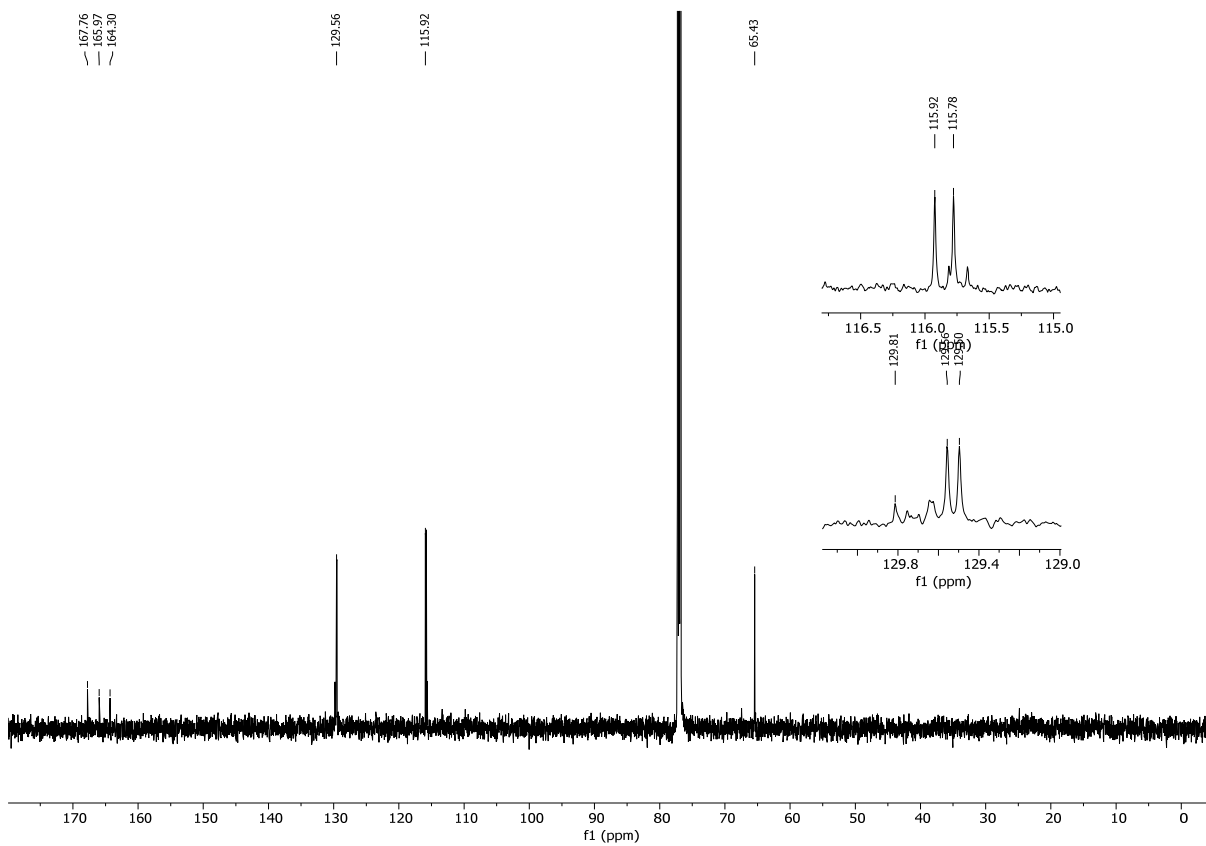

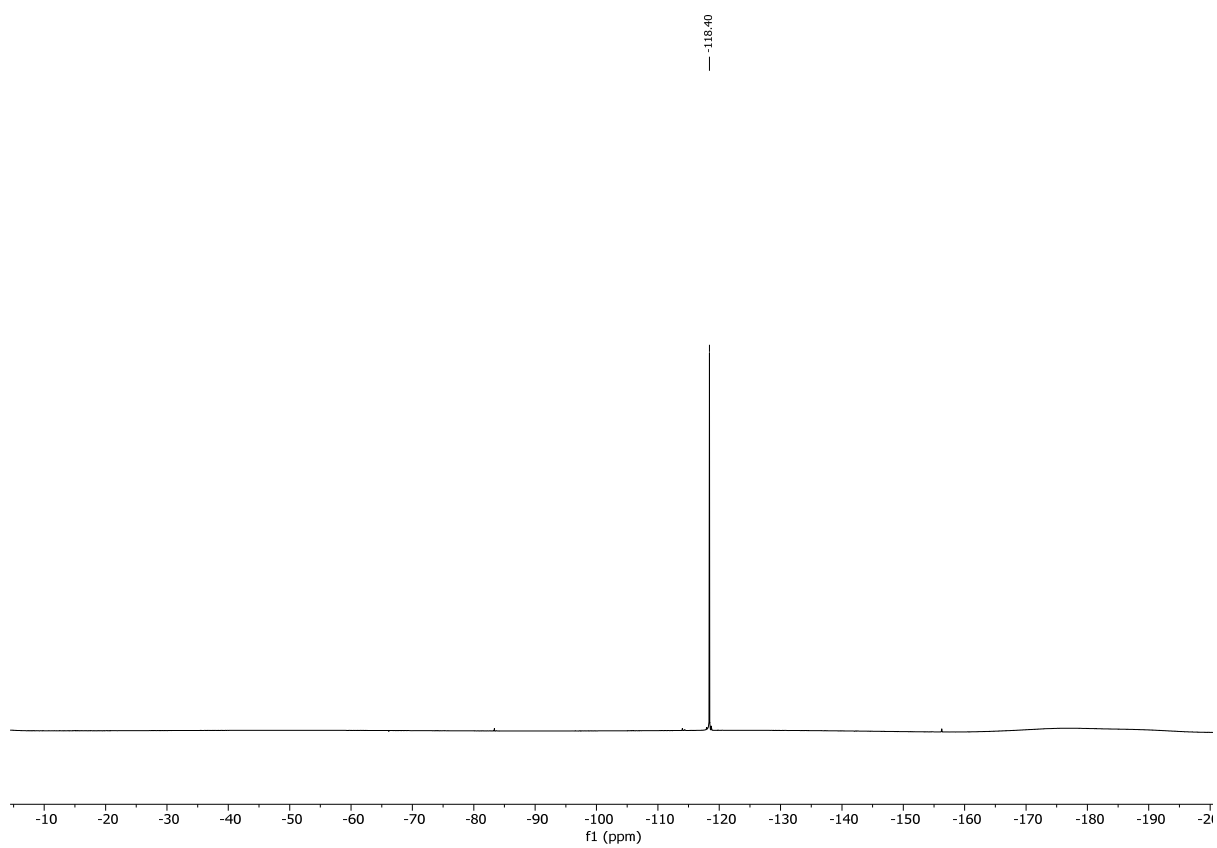

### 3.4. NMR of *N*-(hydroxymethyl)-4-(trifluoromethyl)benzamide in (d1) CDCl<sub>3</sub>

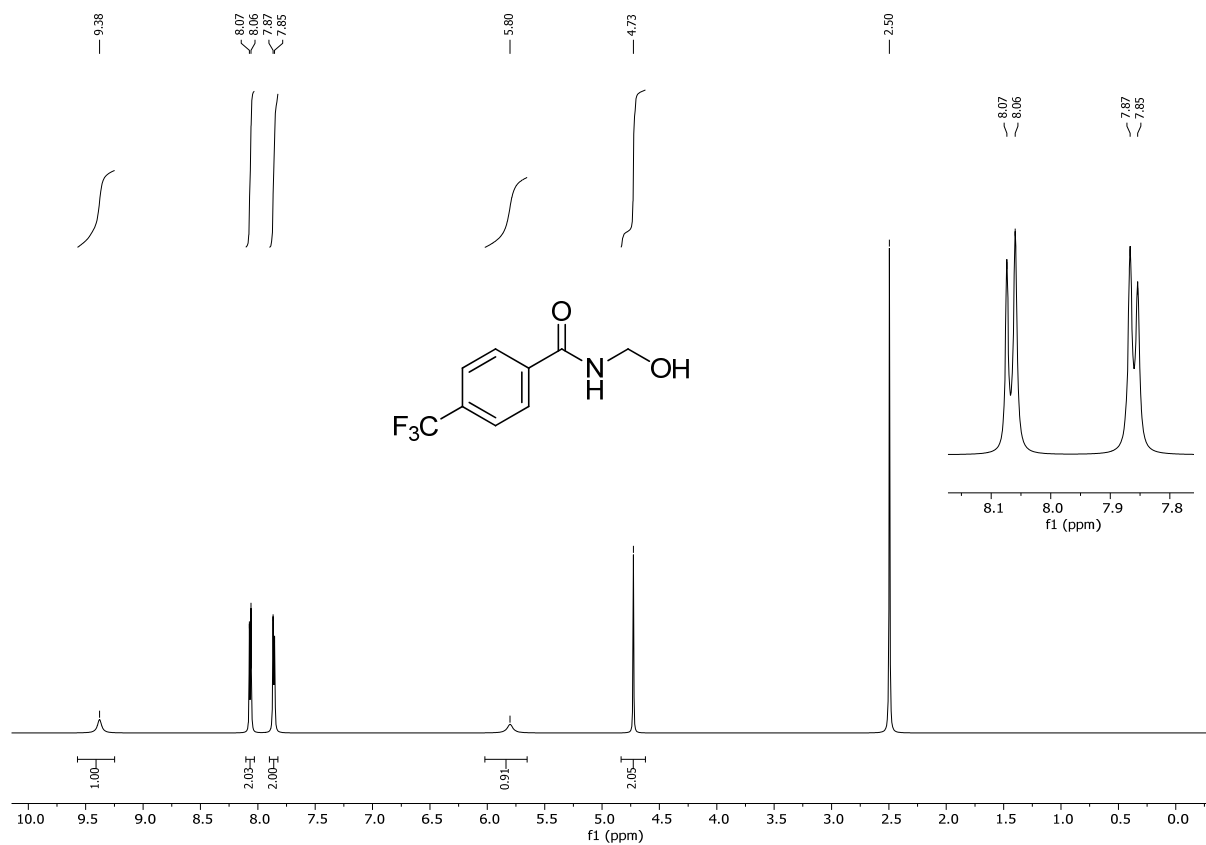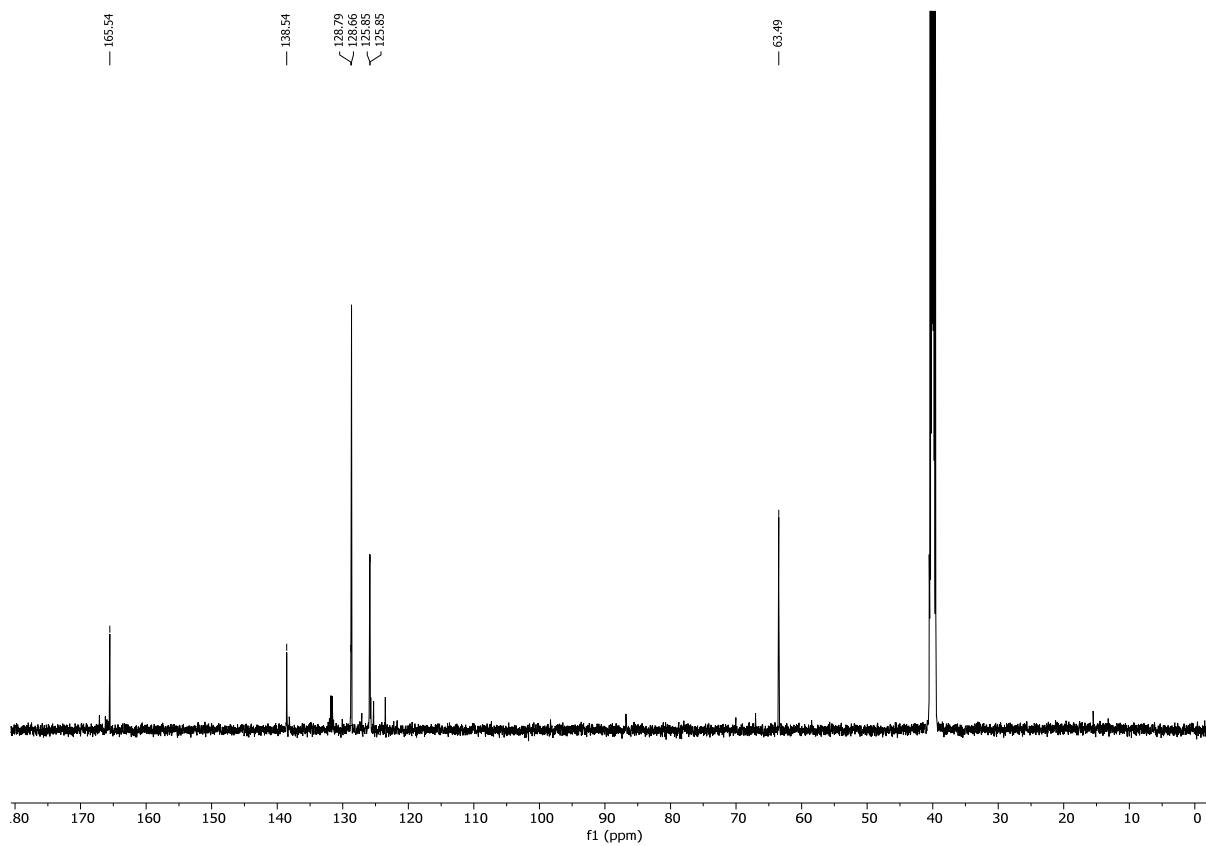



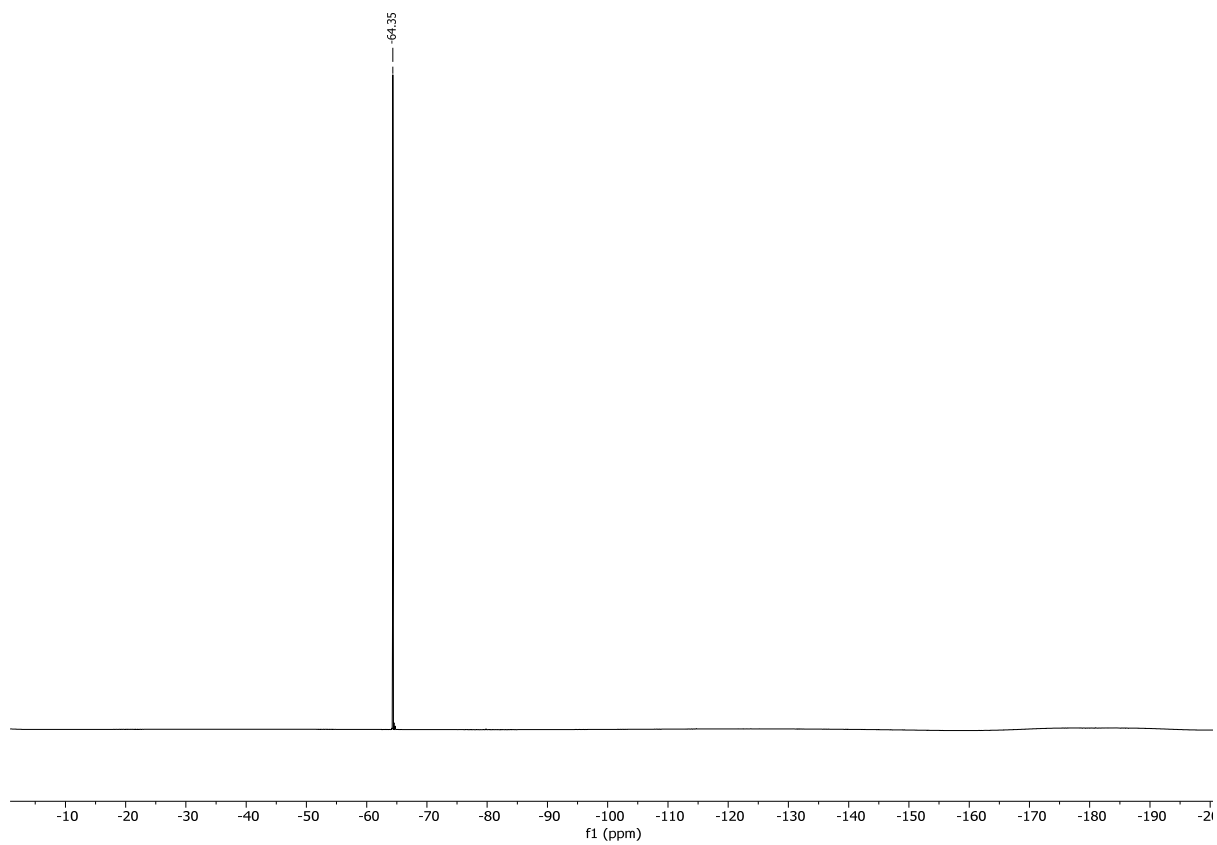

### 3.5. NMR of *N*-(hydroxymethyl)-4-methoxybenzamide (e1) in DMSO- $d_6$

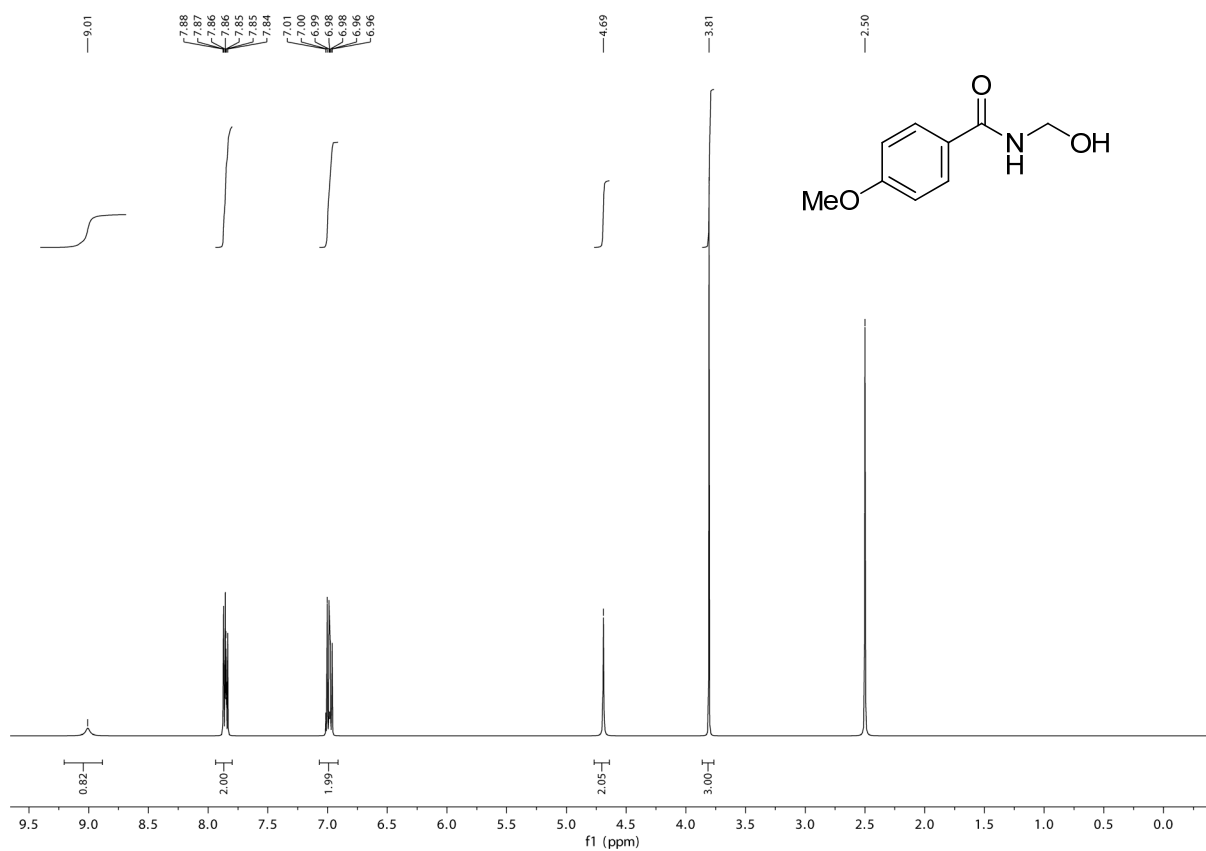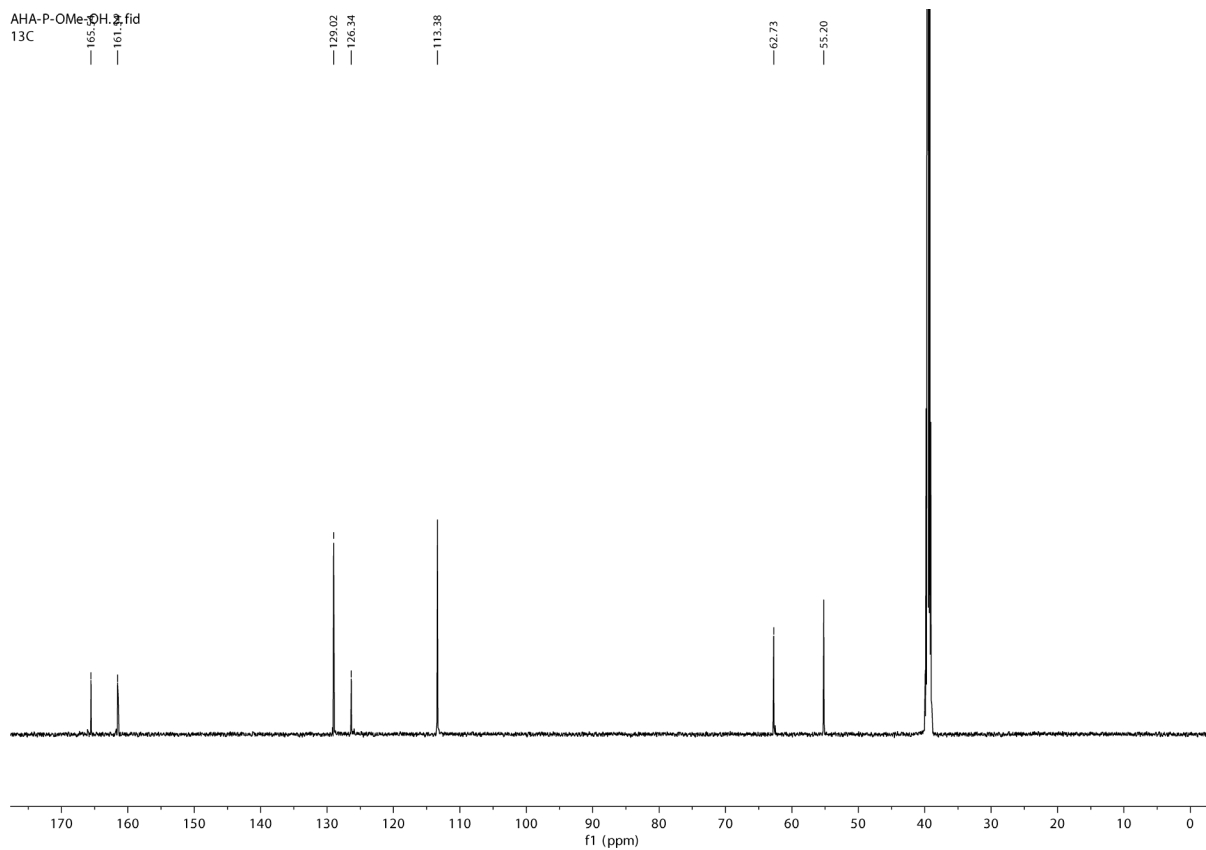

### 3.6. NMR of *N*-(hydroxymethyl)-4-nitrobenzamide (f1) in DMSO-*d*<sub>6</sub>

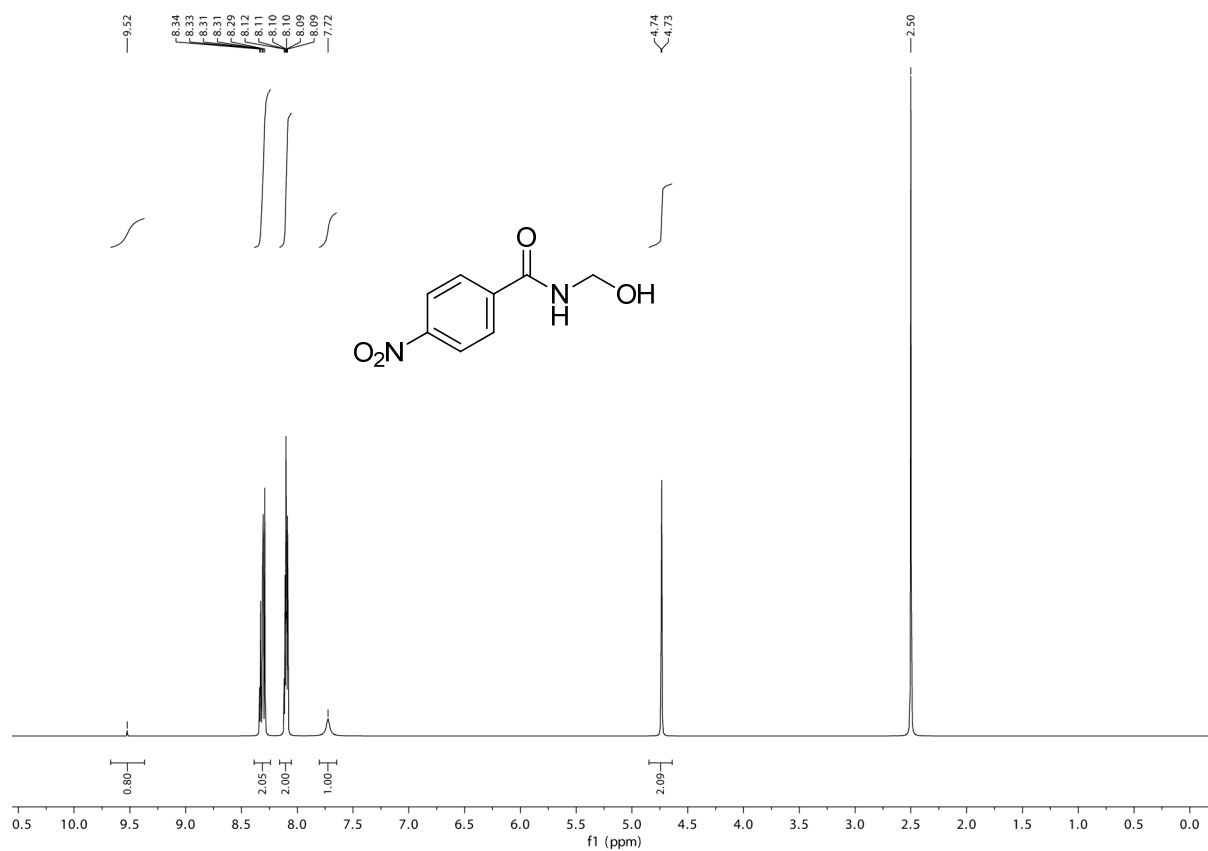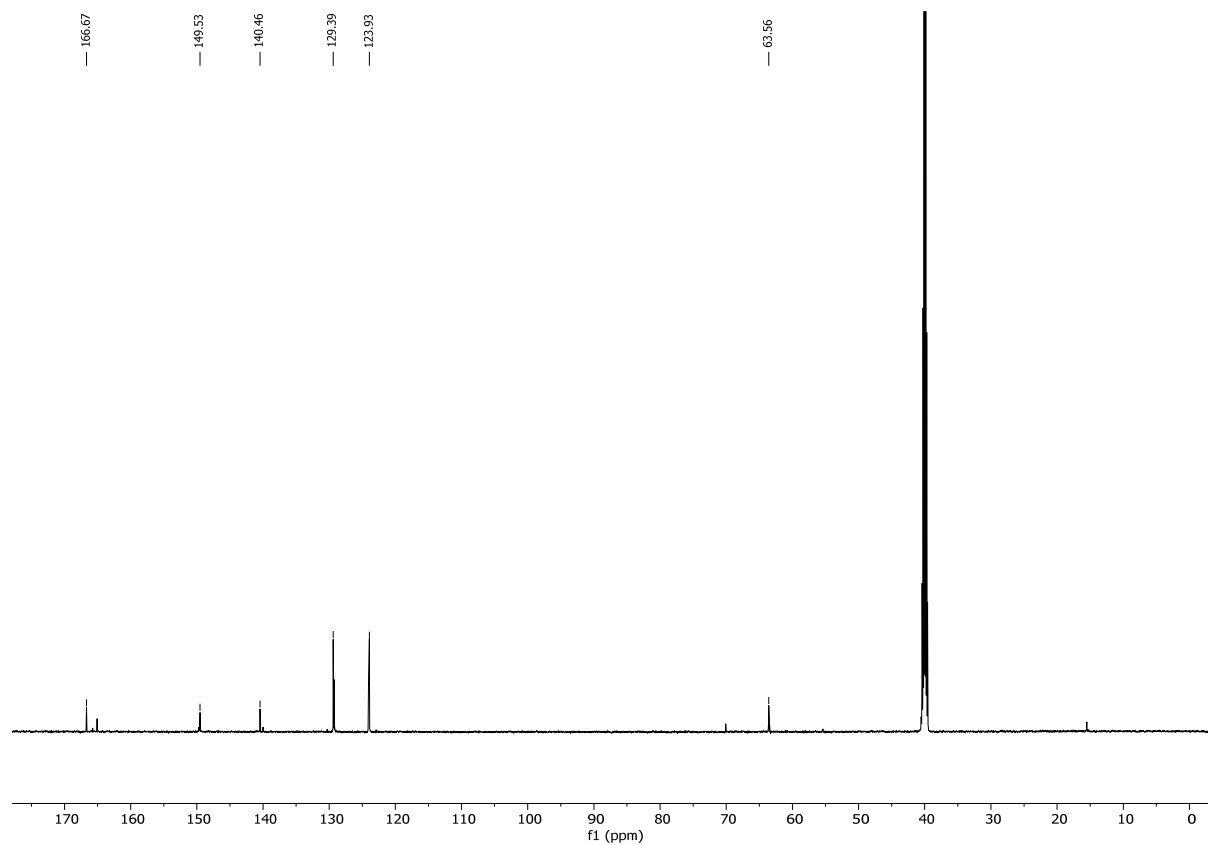

### 3.7.NMR of 2-bromo-N-(hydroxymethyl)benzamide (g1) CDCl<sub>3</sub>

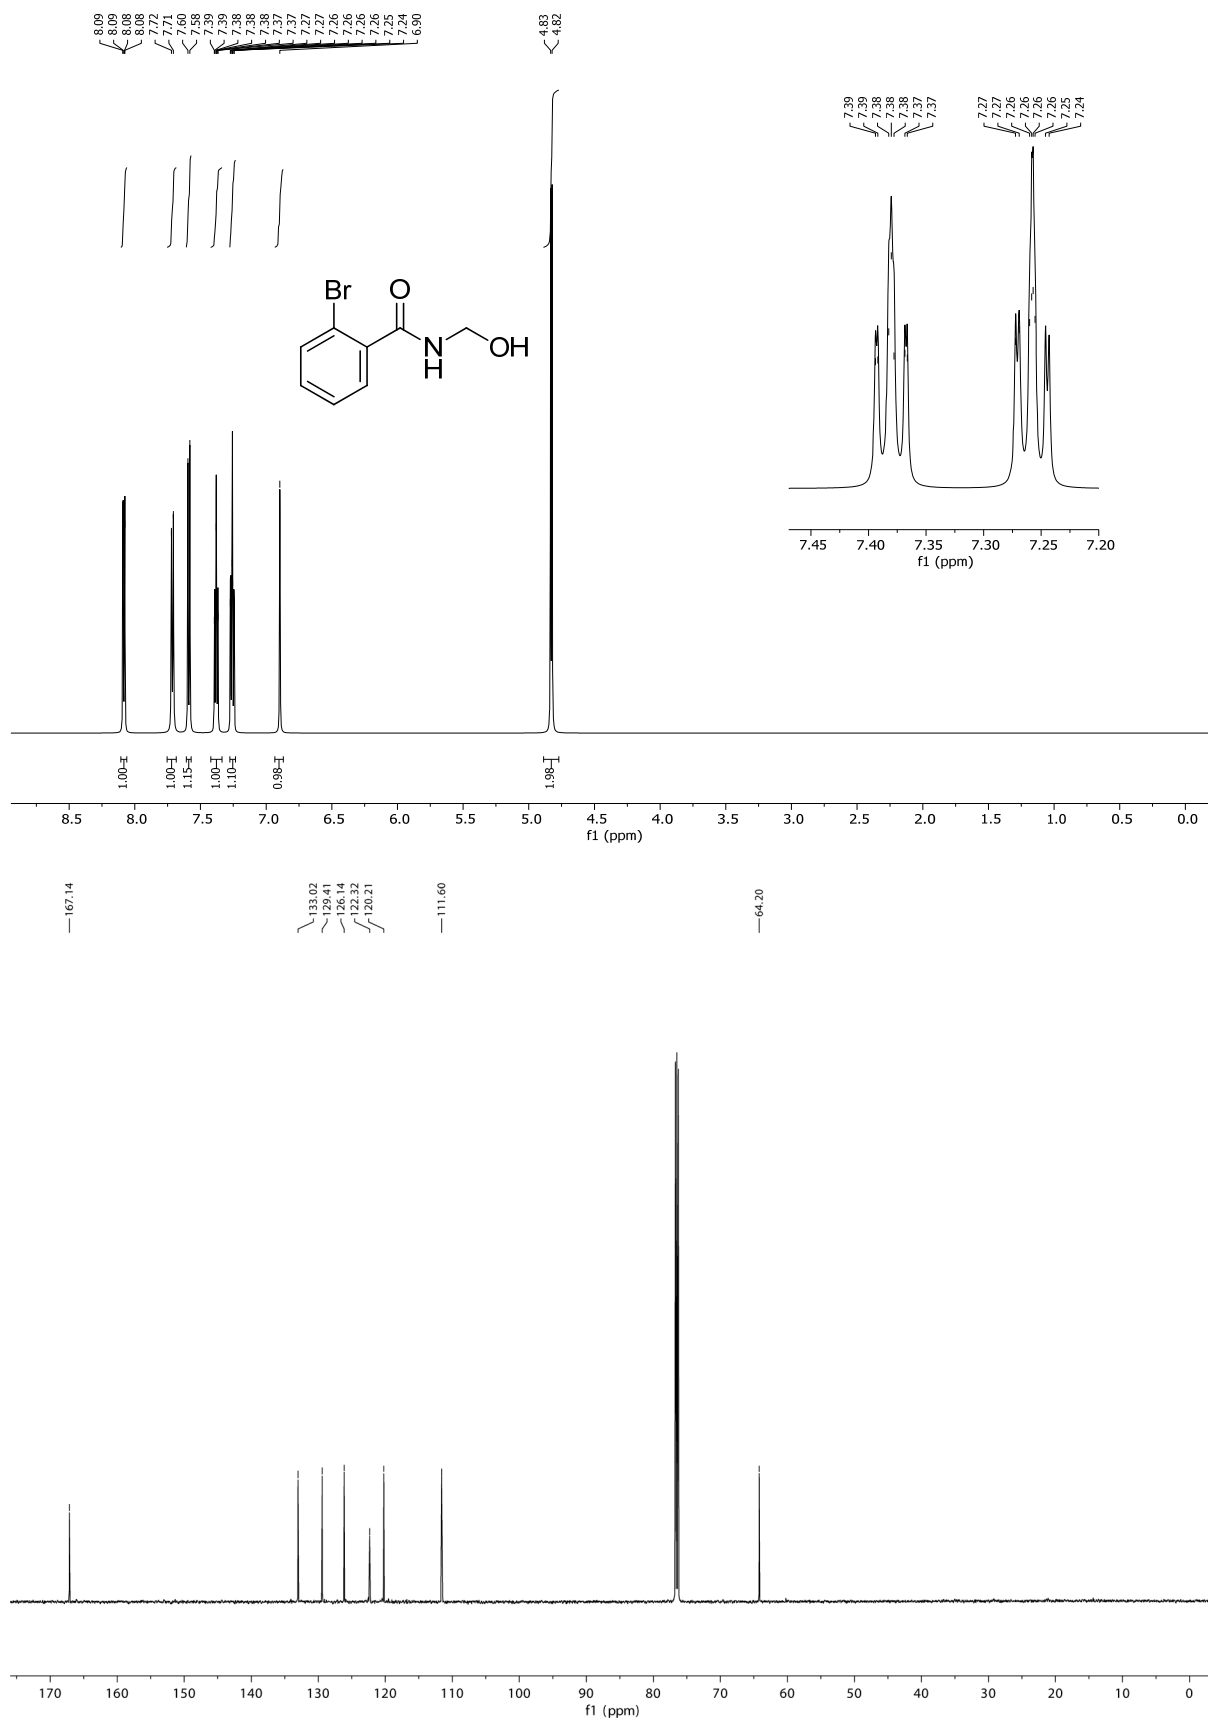

### 3.8.NMR of 3-bromo-N-(hydroxymethyl)benzamide (h1) in CDCl<sub>3</sub>

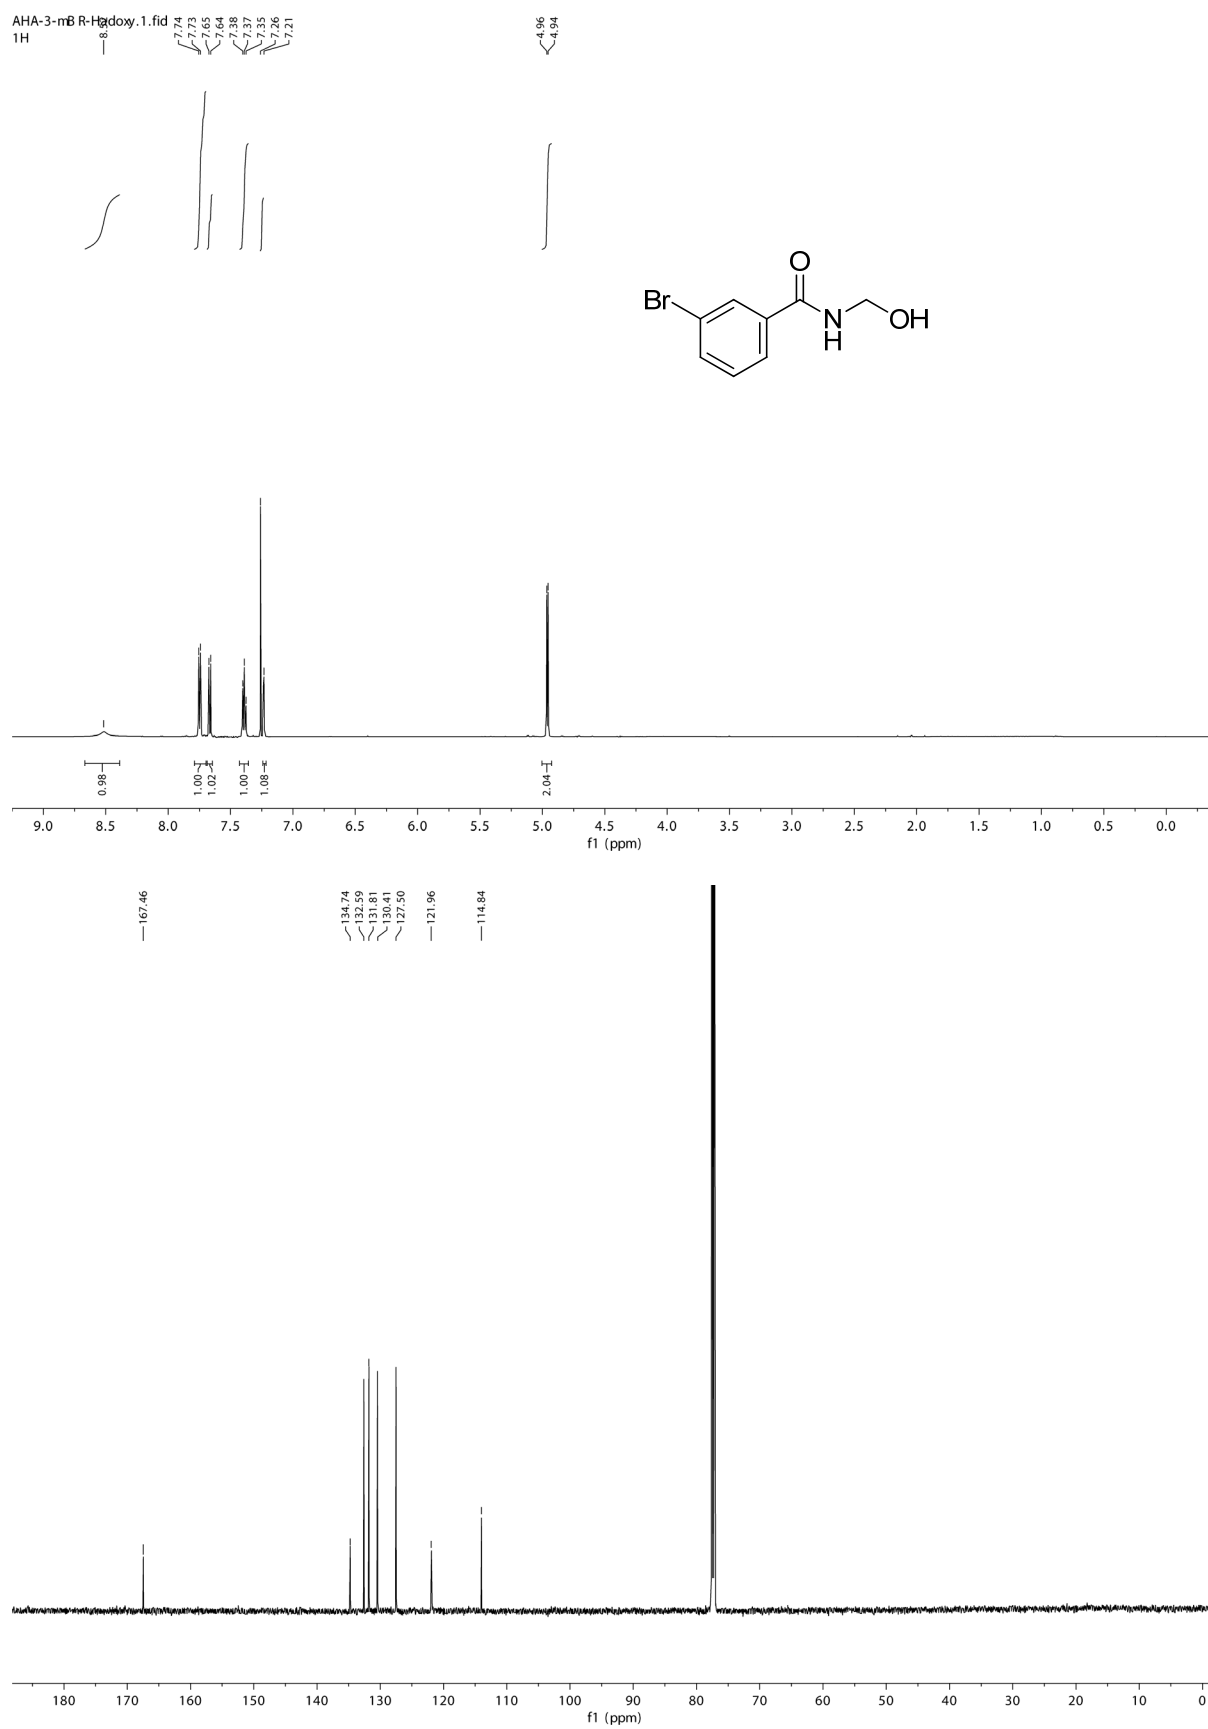

### 3.9.NMR of 2-ethoxy-*N*-(hydroxymethyl)benzamide (i1) in CDCl<sub>3</sub>

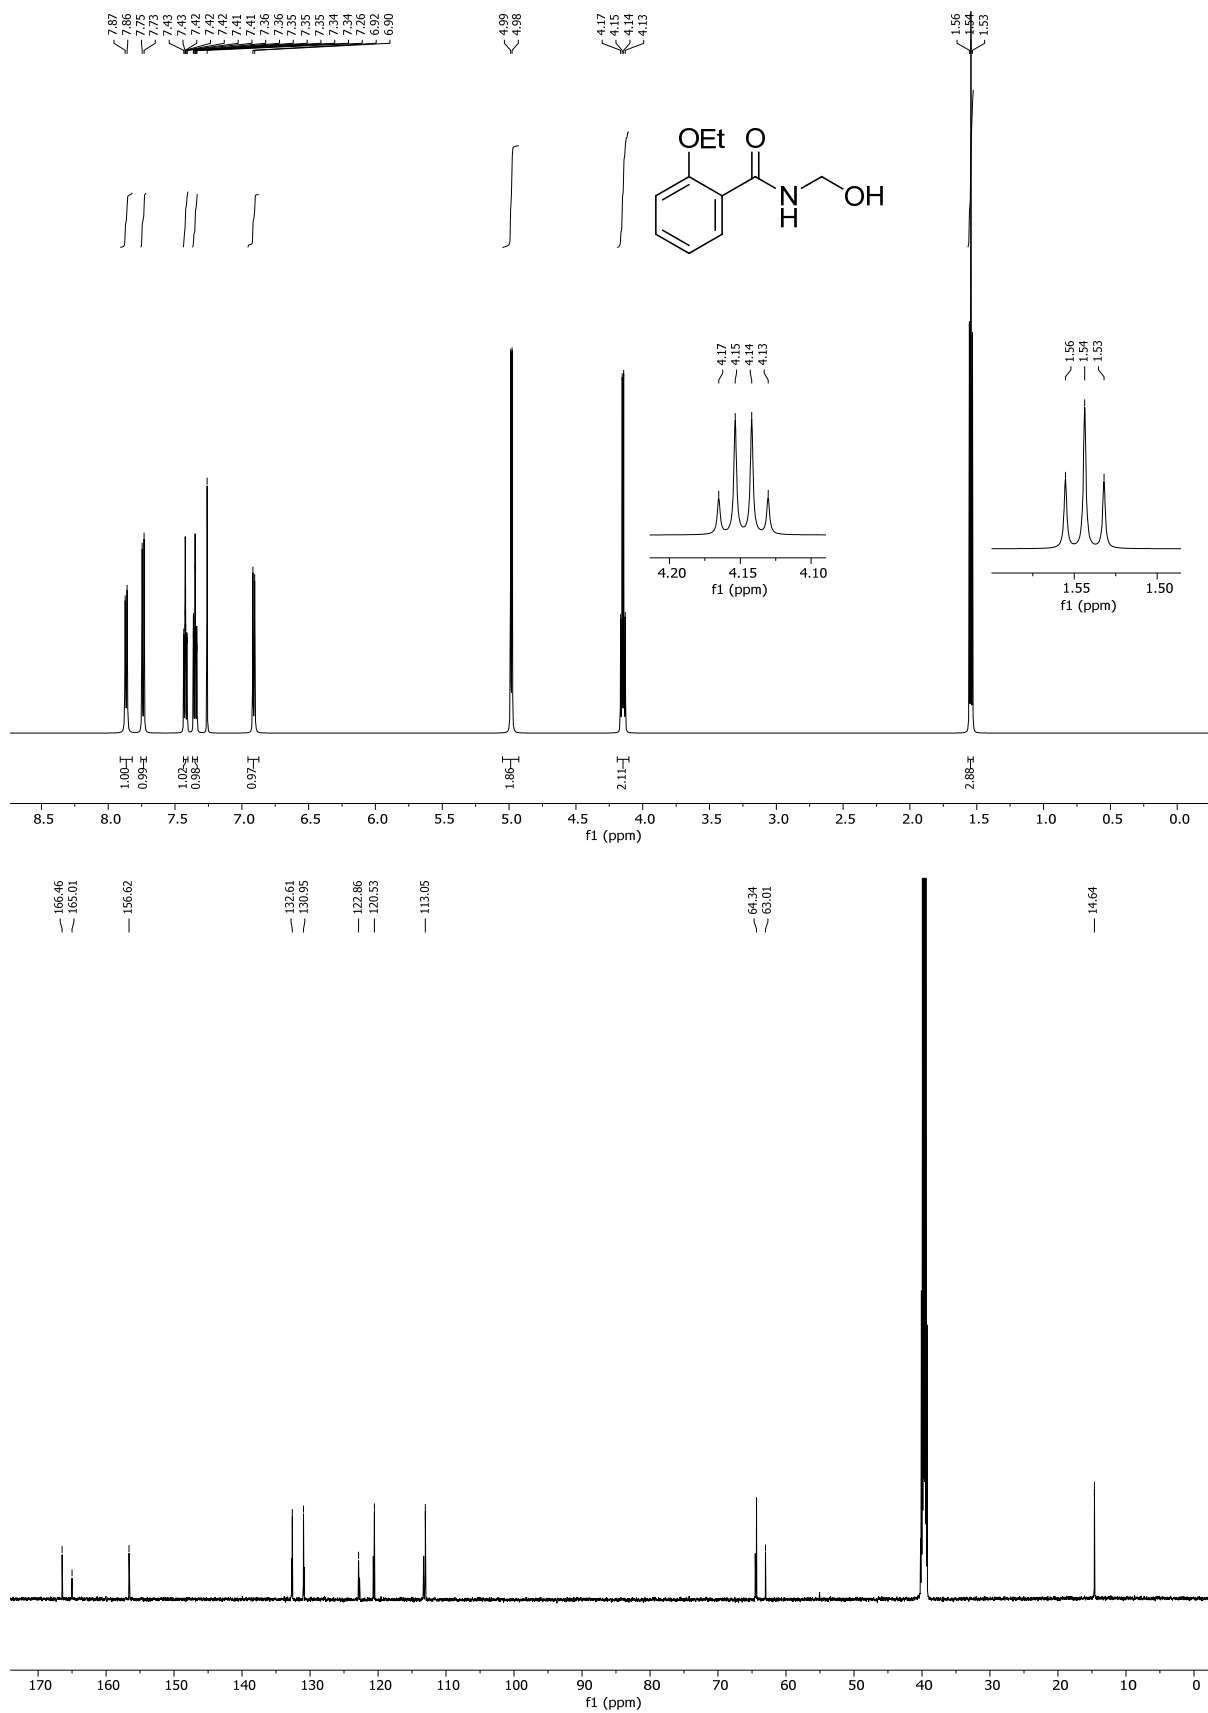

### 3.10. NMR of 3,5-dibromo-N-(hydroxymethyl)benzamide (j1) in DMSO-*d*<sub>6</sub>

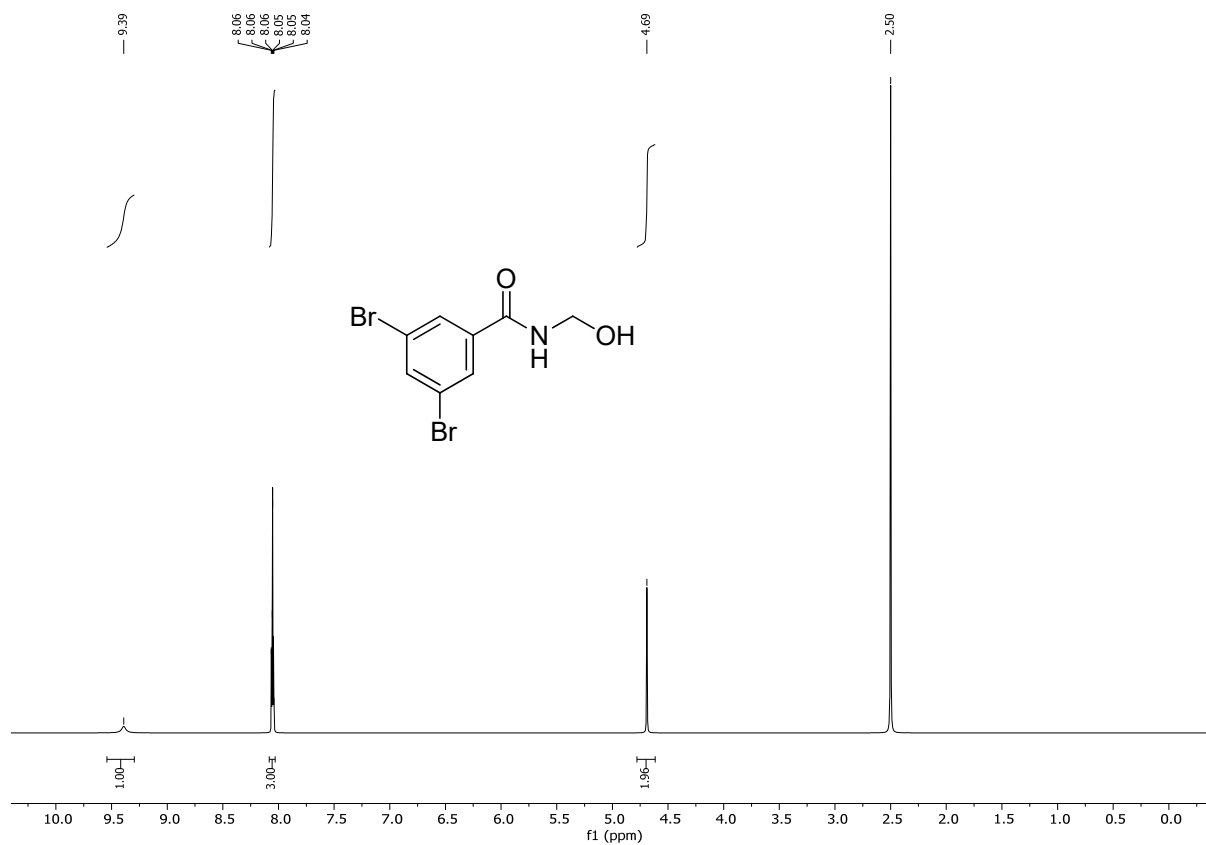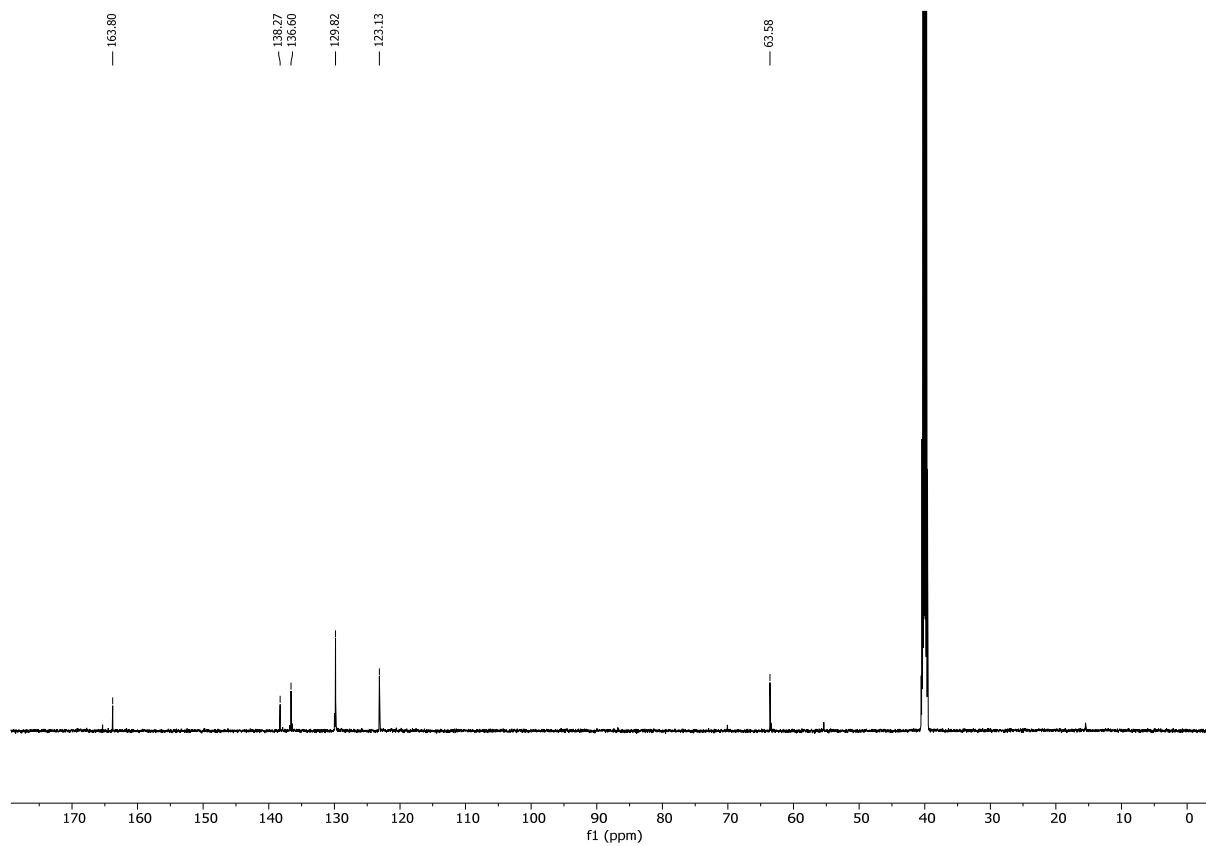

### 3.11. NMR of *N*-(hydroxymethyl)-3,4,5-trimethoxybenzamide (k1) in DMSO-

**d<sub>6</sub>**

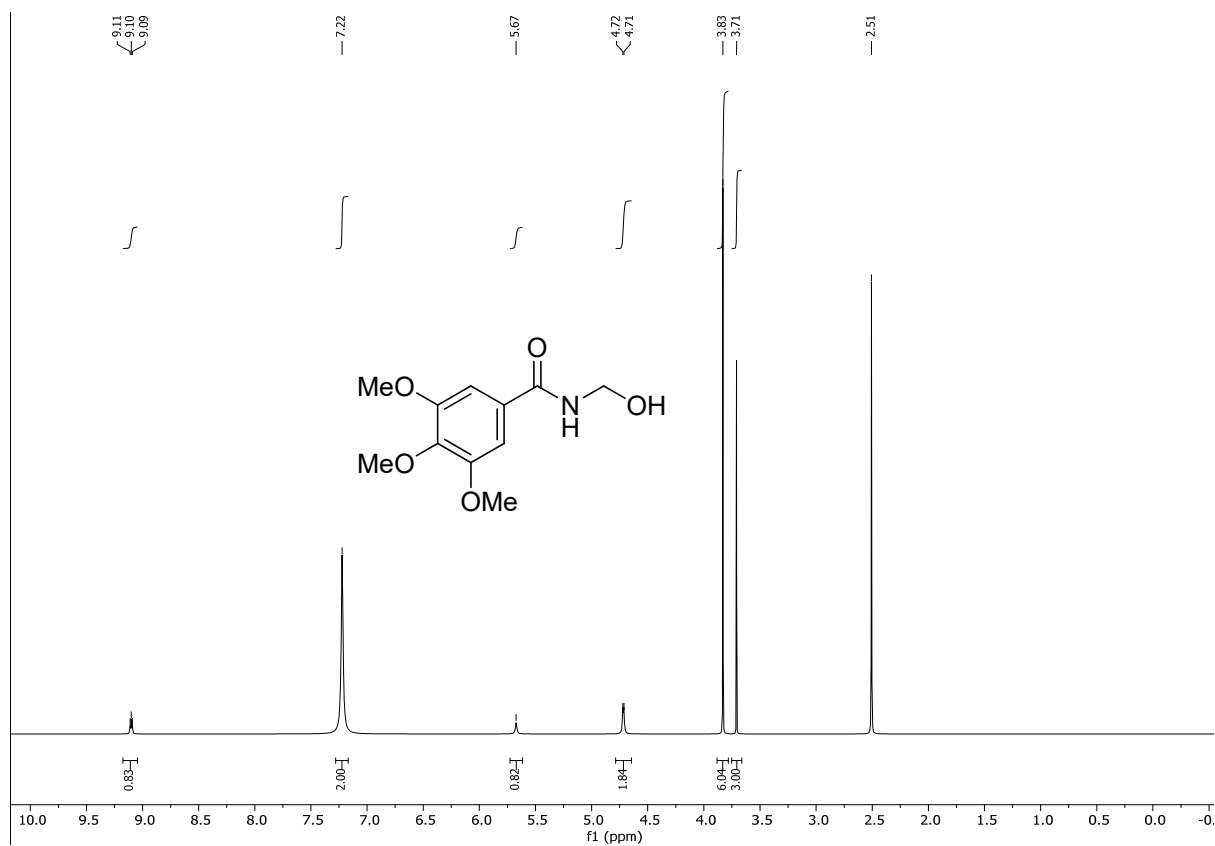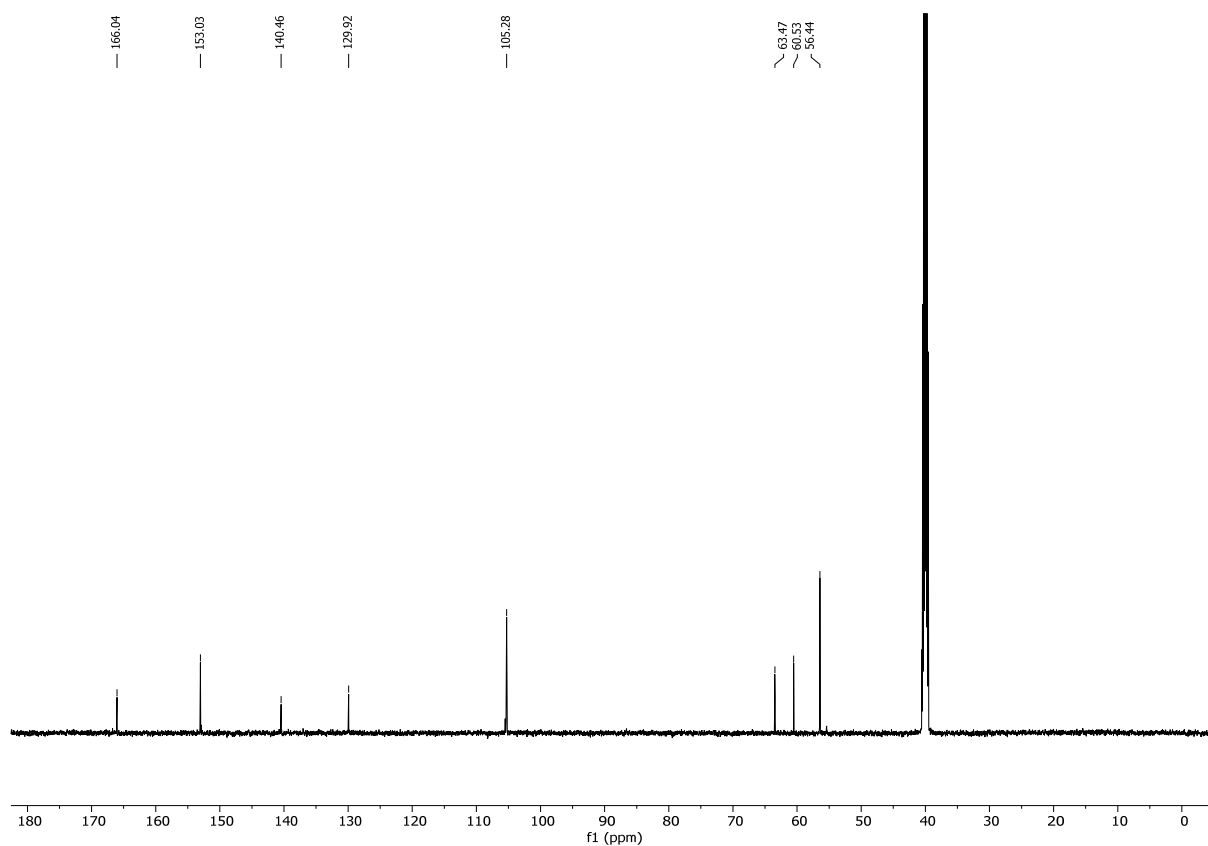



### 3.12. NMR of *N*-(hydroxymethyl)picolinamide (11) in CDCl<sub>3</sub>

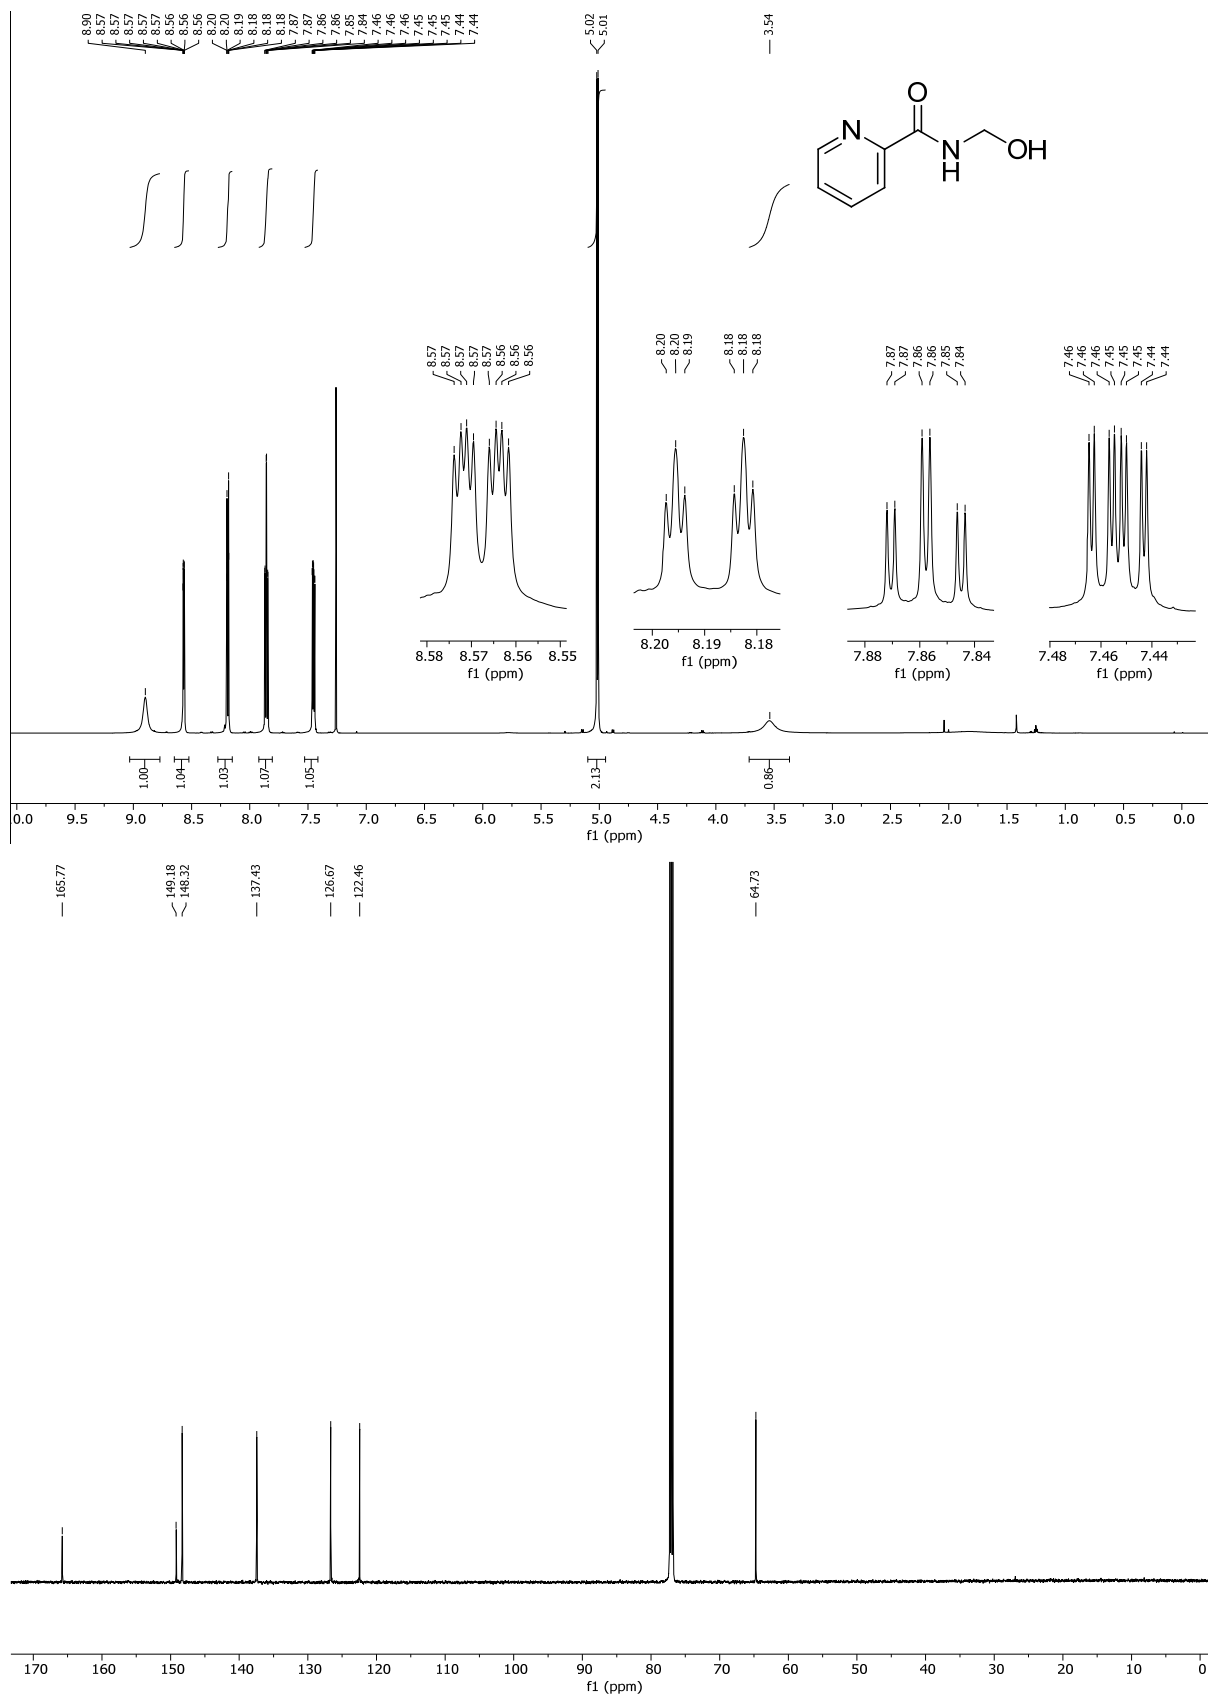

### 3.13. NMR of *N*-((2-hydroxynaphthalen-1-yl)methyl)benzamide (4a) in DMSO-*d*<sub>6</sub>

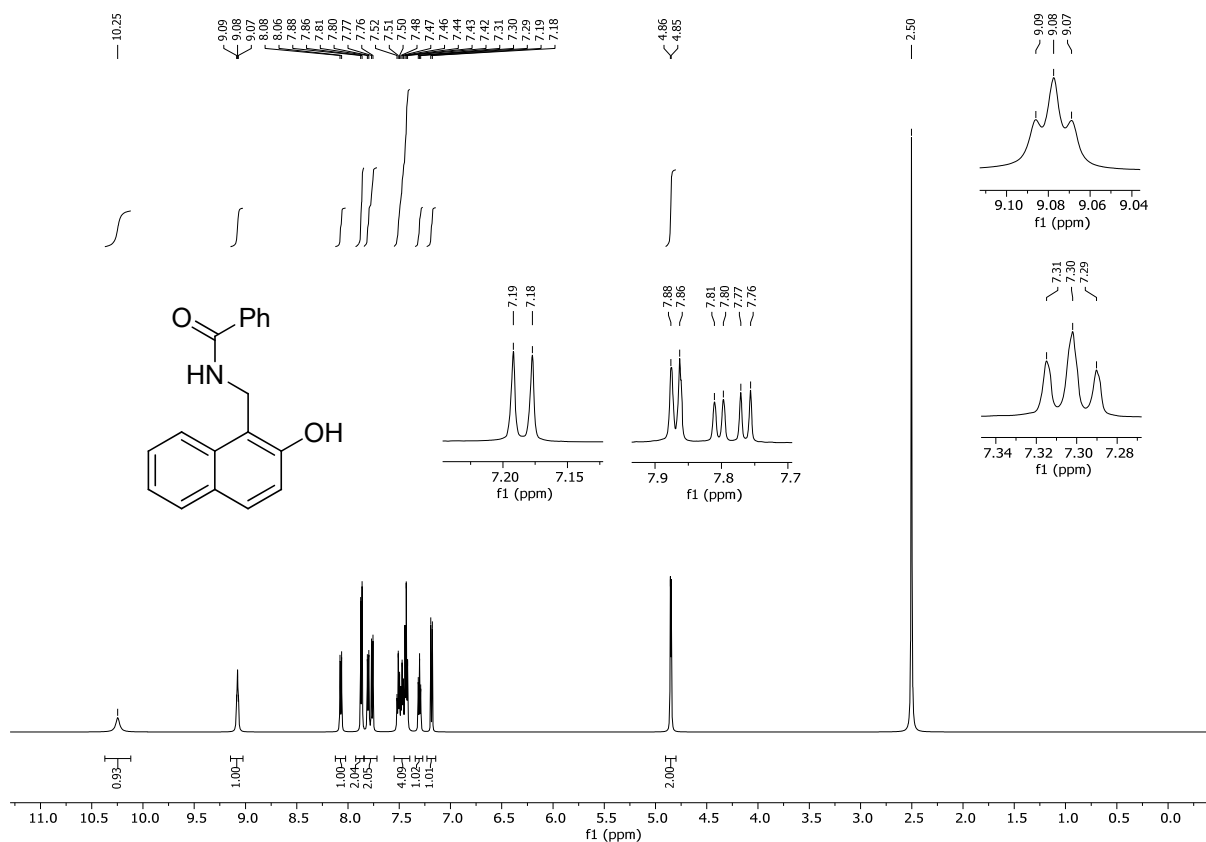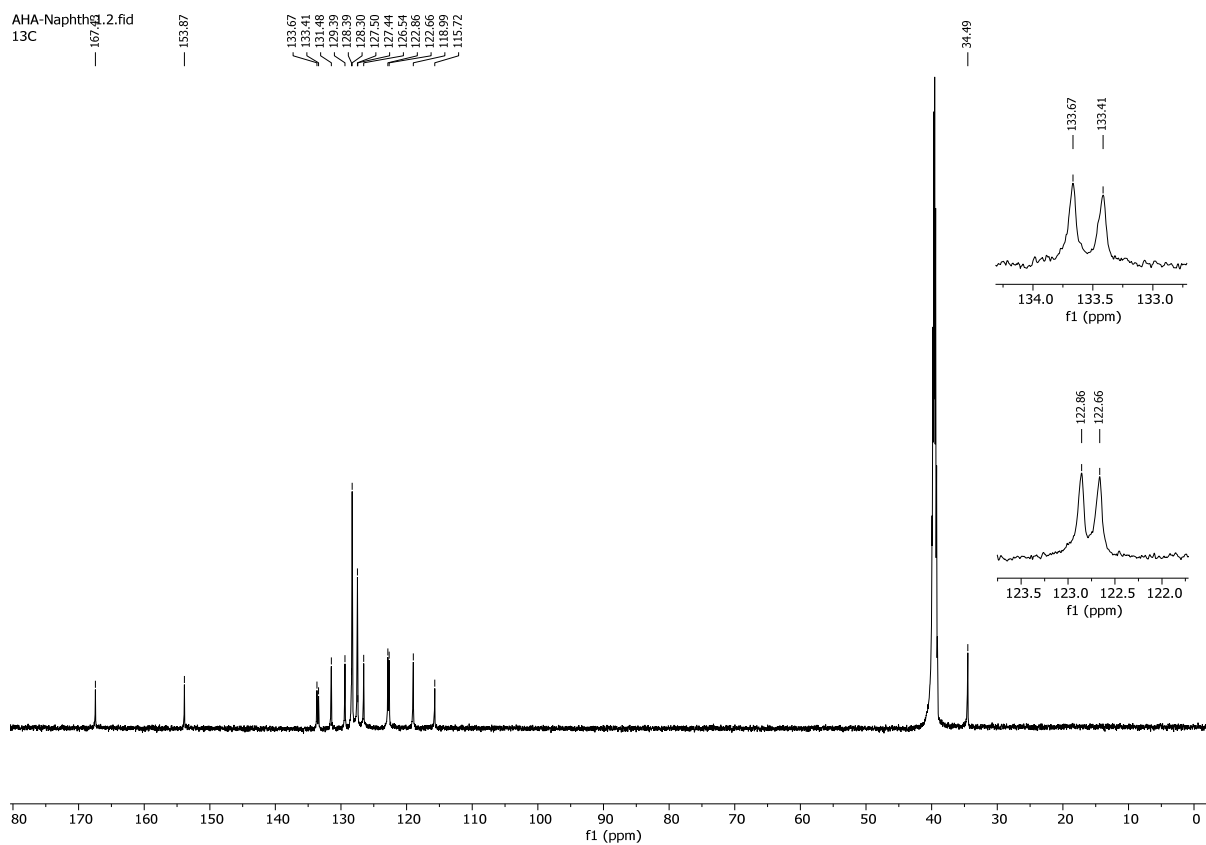

### 3.14. NMR of *N*-((6-bromo-2-hydroxynaphthalen-1-yl)methyl)benzamide (4b) in CDCl<sub>3</sub>

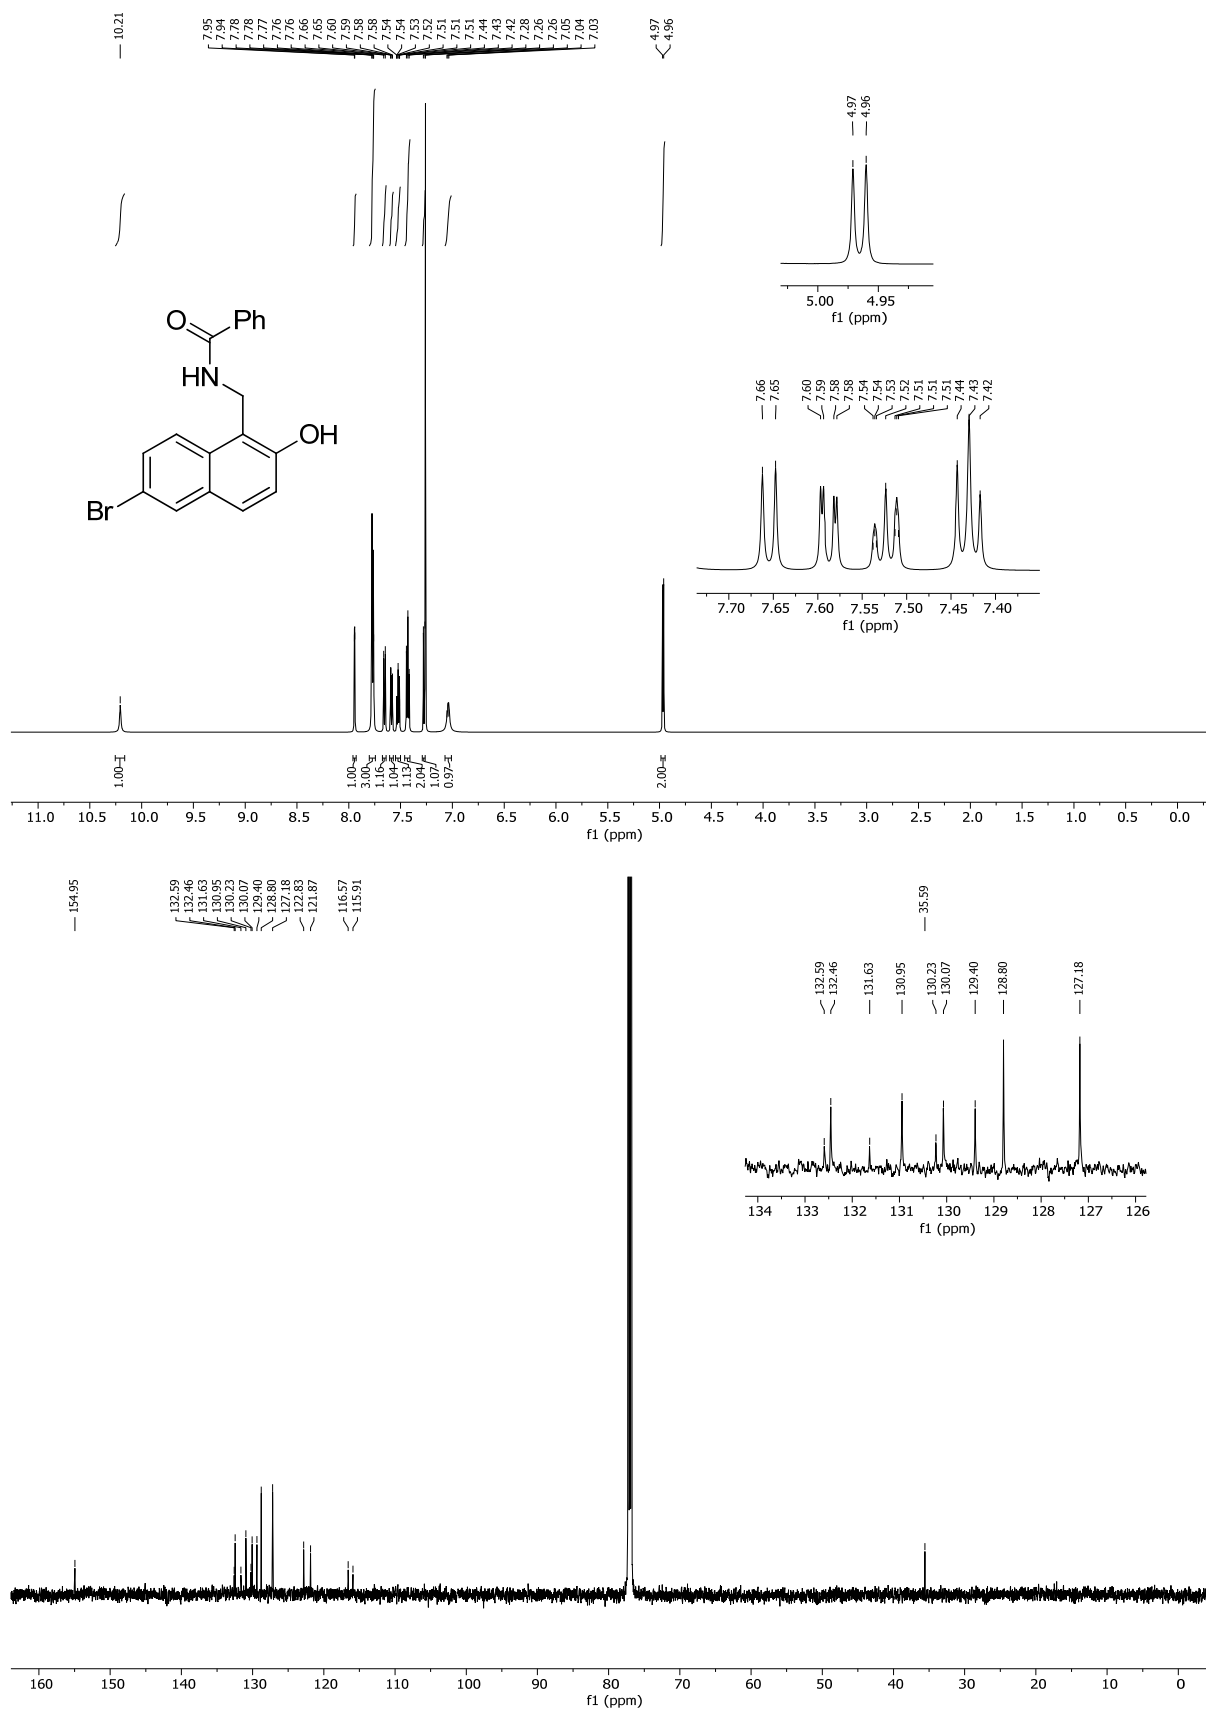

### 3.15. N-((2-hydroxy-7-methoxynaphthalen-1-yl)methyl)benzamide (4c) in CDCl<sub>3</sub>

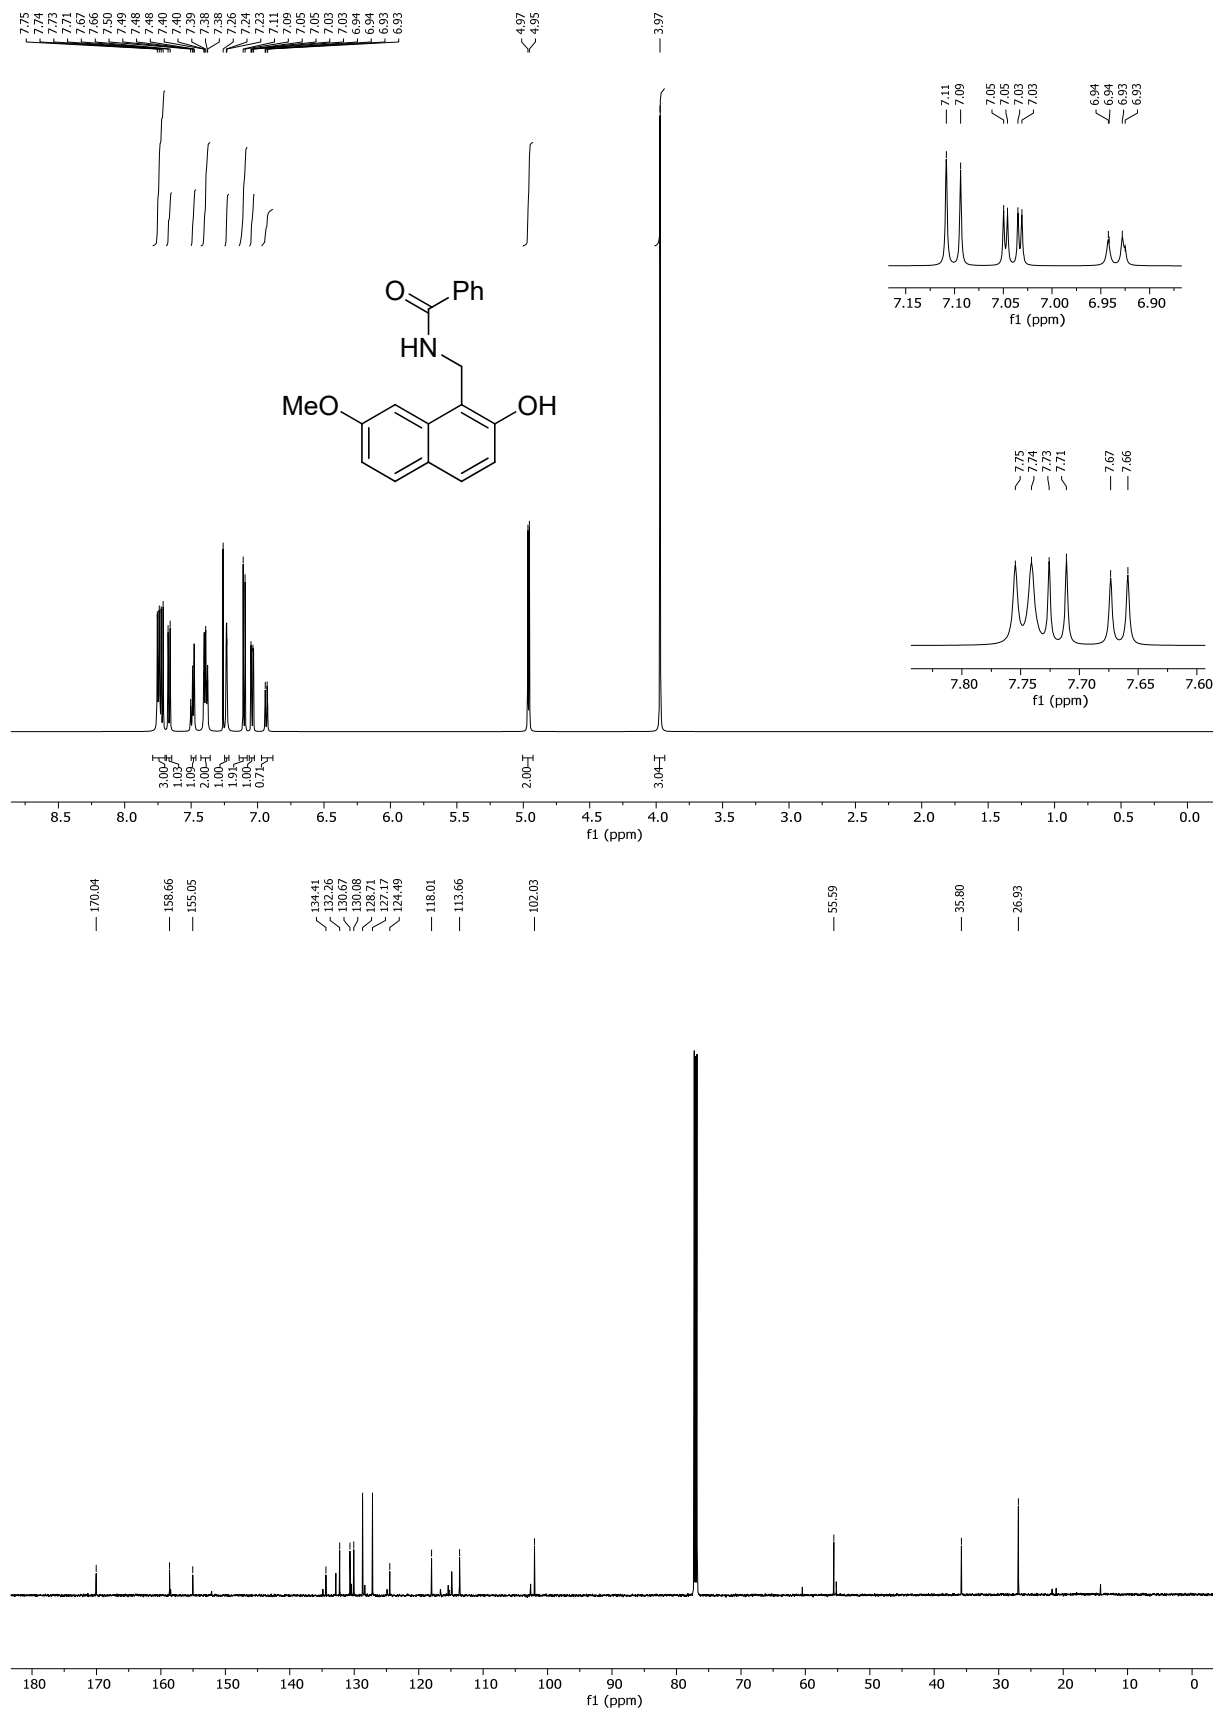

3.16. NMR of *N*-((2,7-dihydroxynaphthalen-1-yl)methyl)benzamide (4d) in CDCl<sub>3</sub>

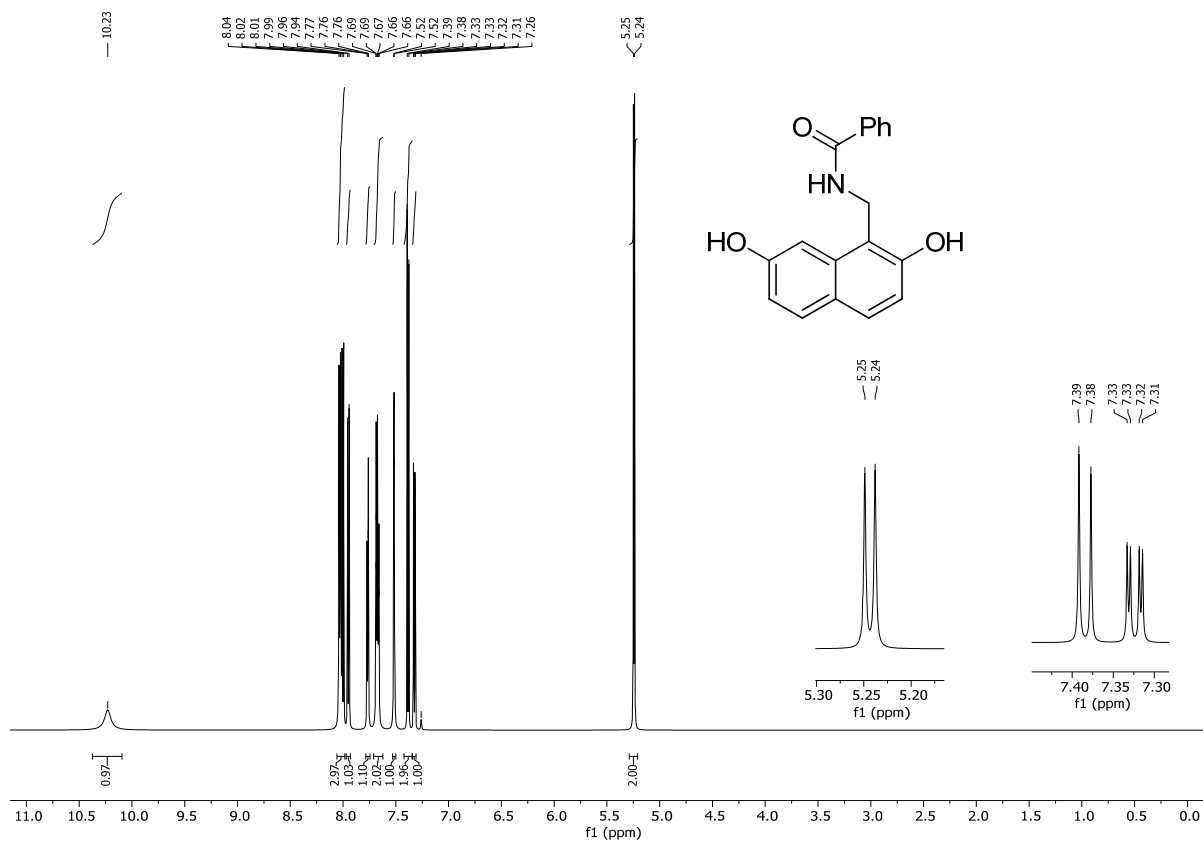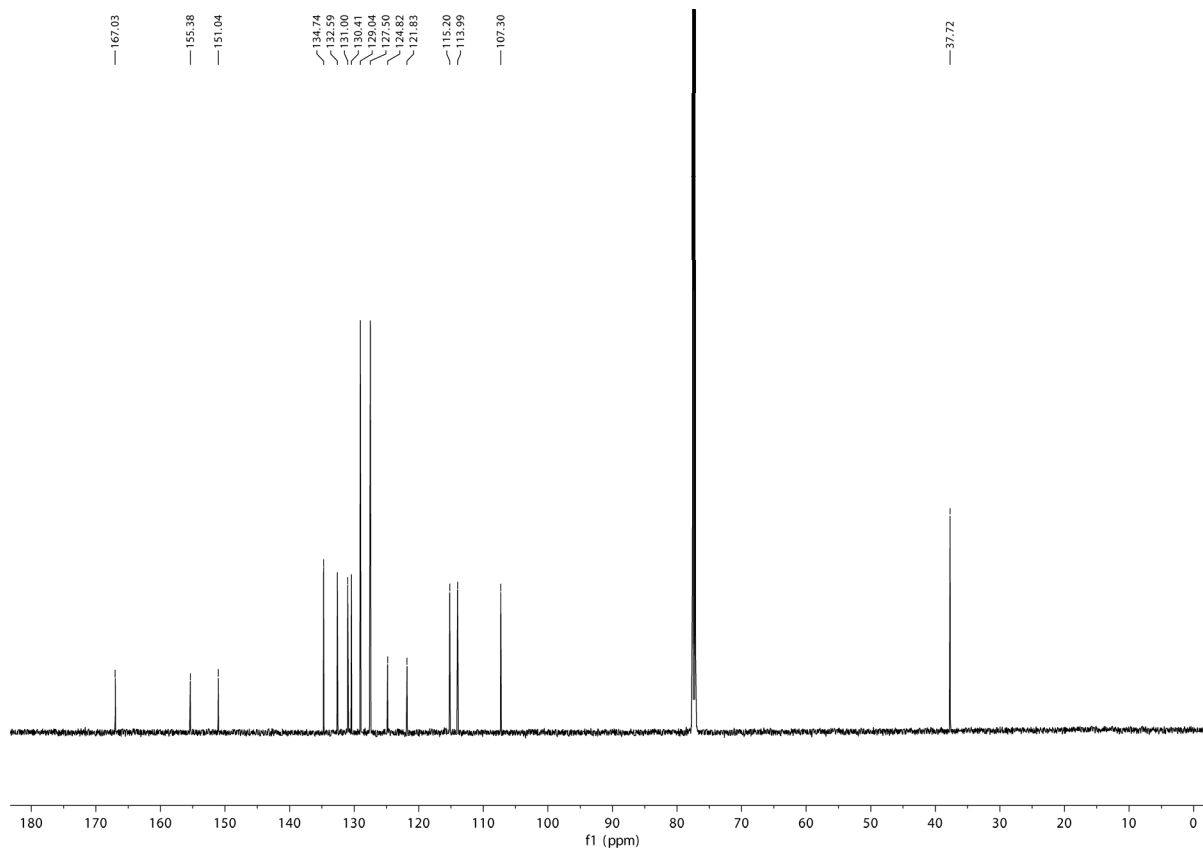

### 3.17. NMR of 4-(benzamidomethyl)-3-hydroxy-2-naphthoate (4e) in CDCl<sub>3</sub>

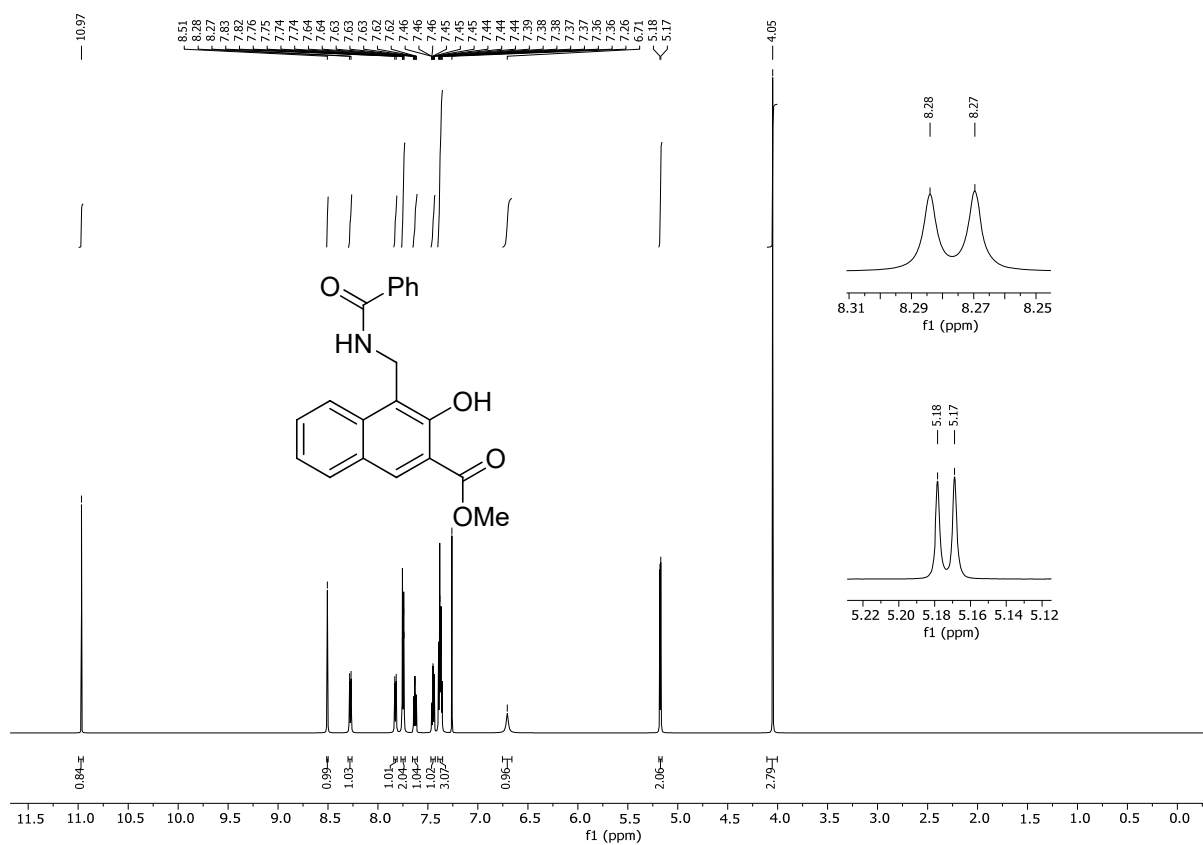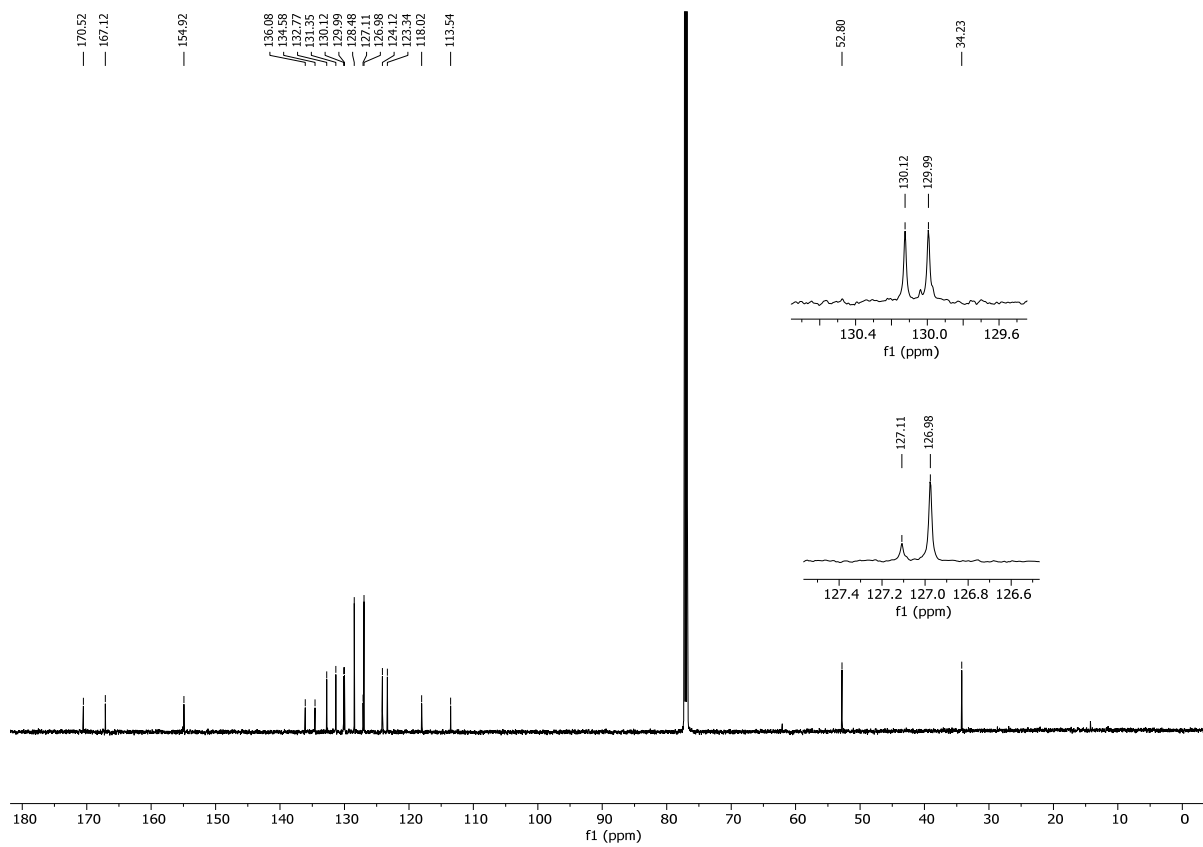

### 3.18. NMR of ethyl 4-(benzamidomethyl)-3-hydroxy-2-naphthoate (4f) in CDCl<sub>3</sub>

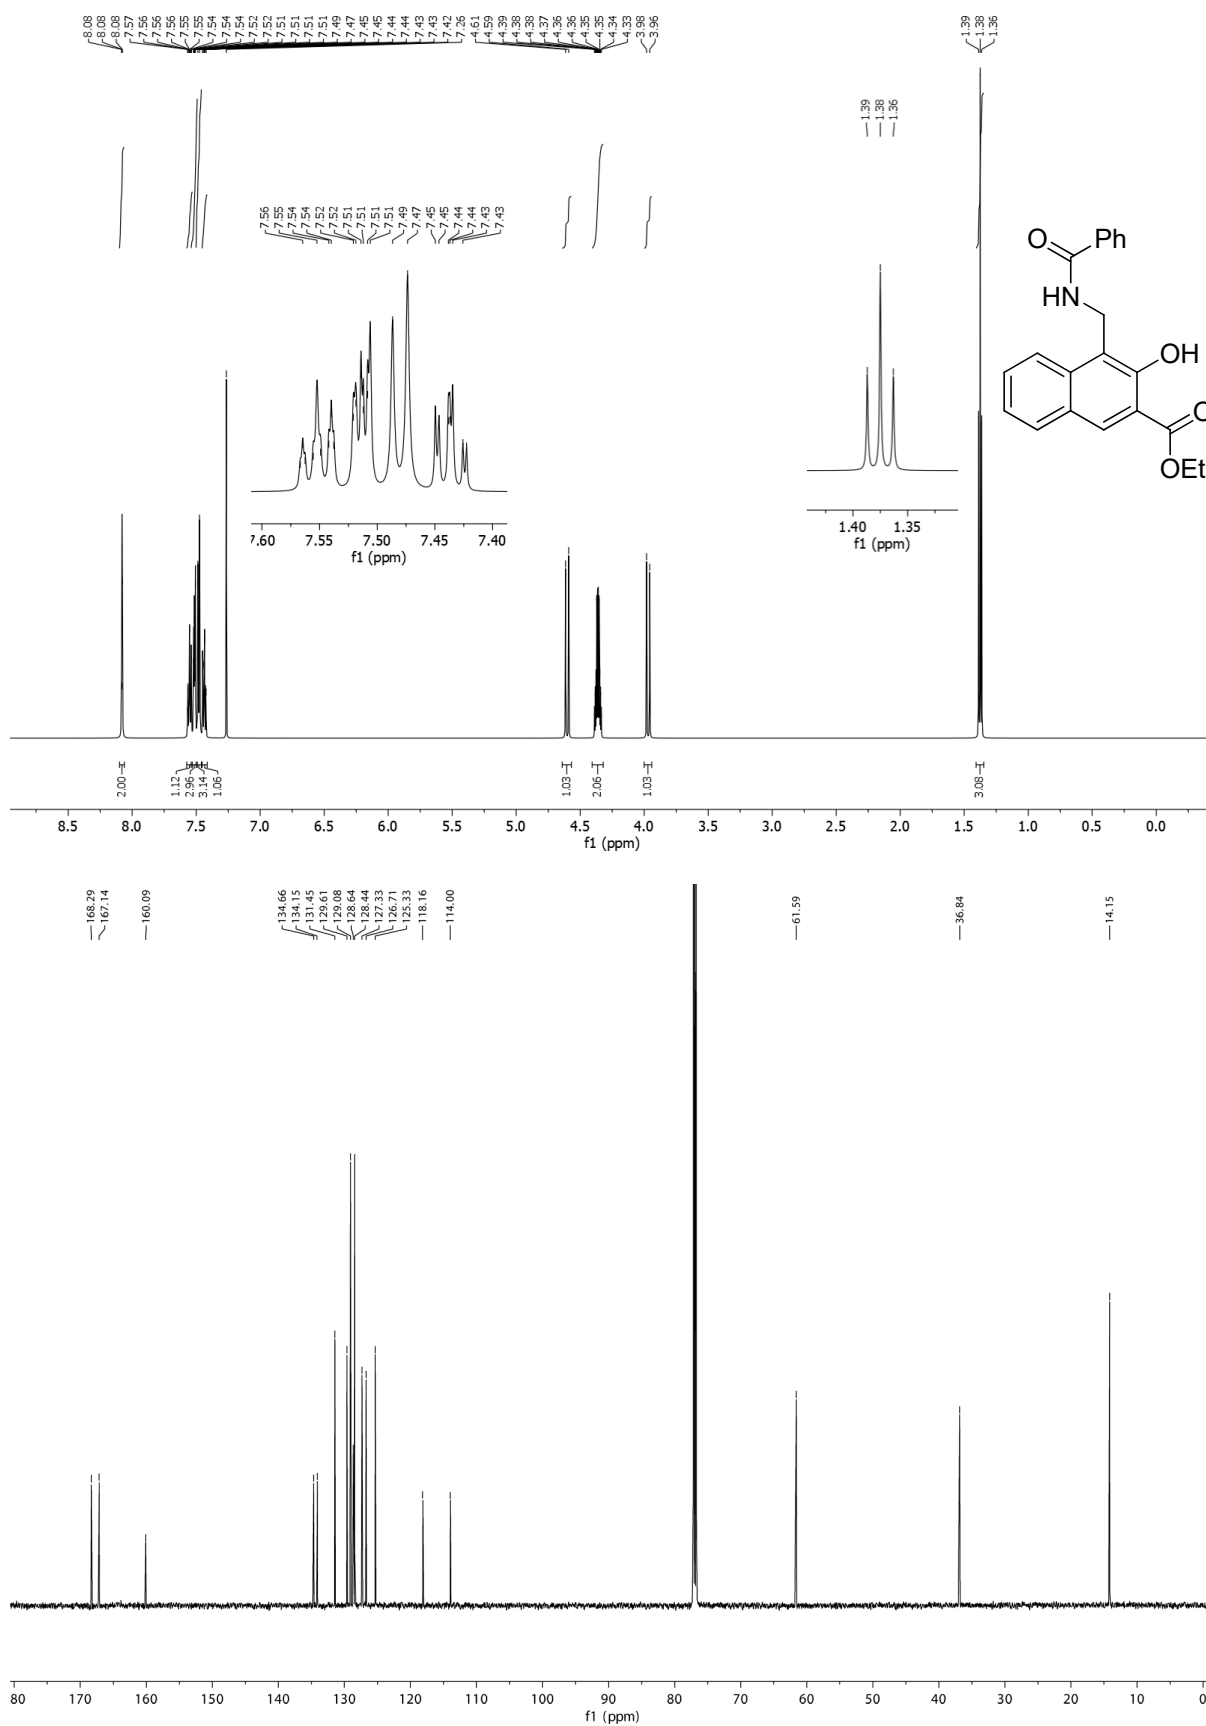

### 3.19.NMR of *N*-((2-hydroxy-4a,5,6,7,8,8a-hexahydronaphthalen-1-yl)methyl) benzamide (4g) in CDCl<sub>3</sub>

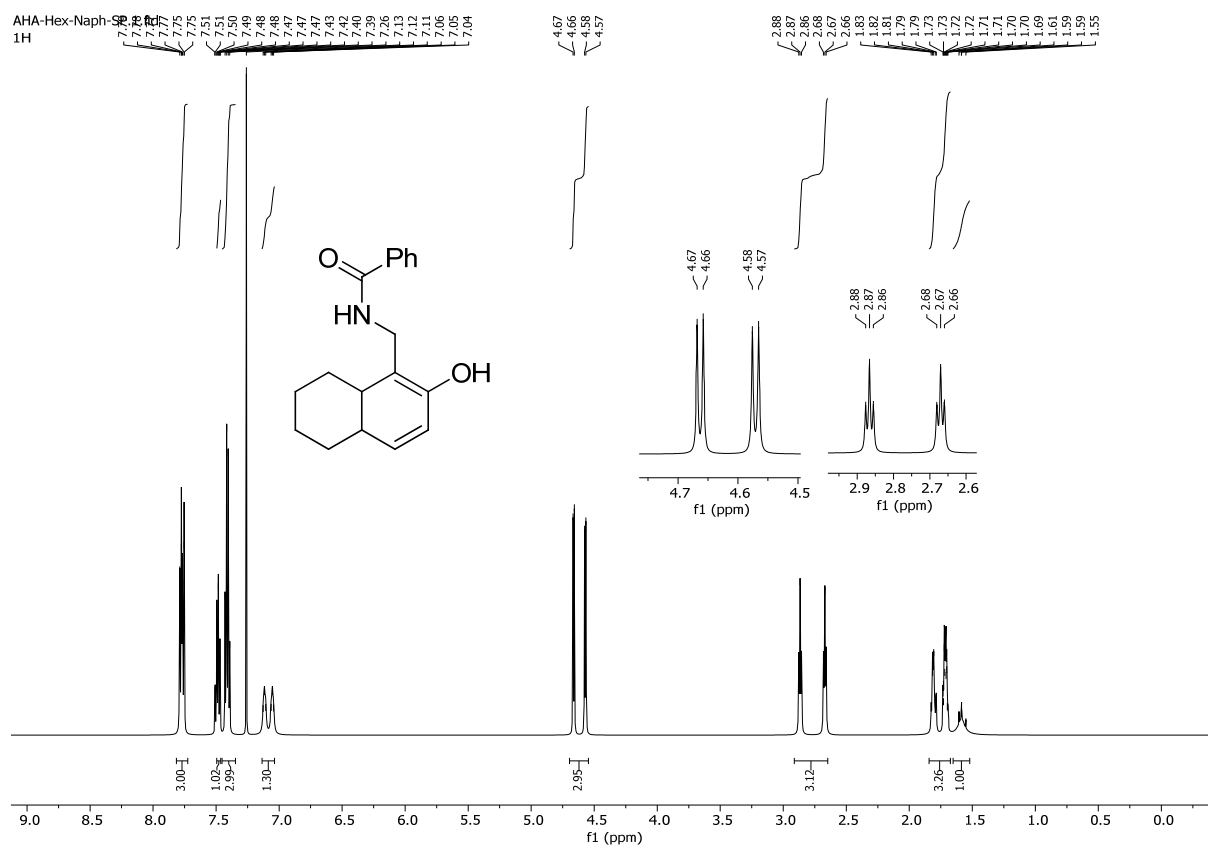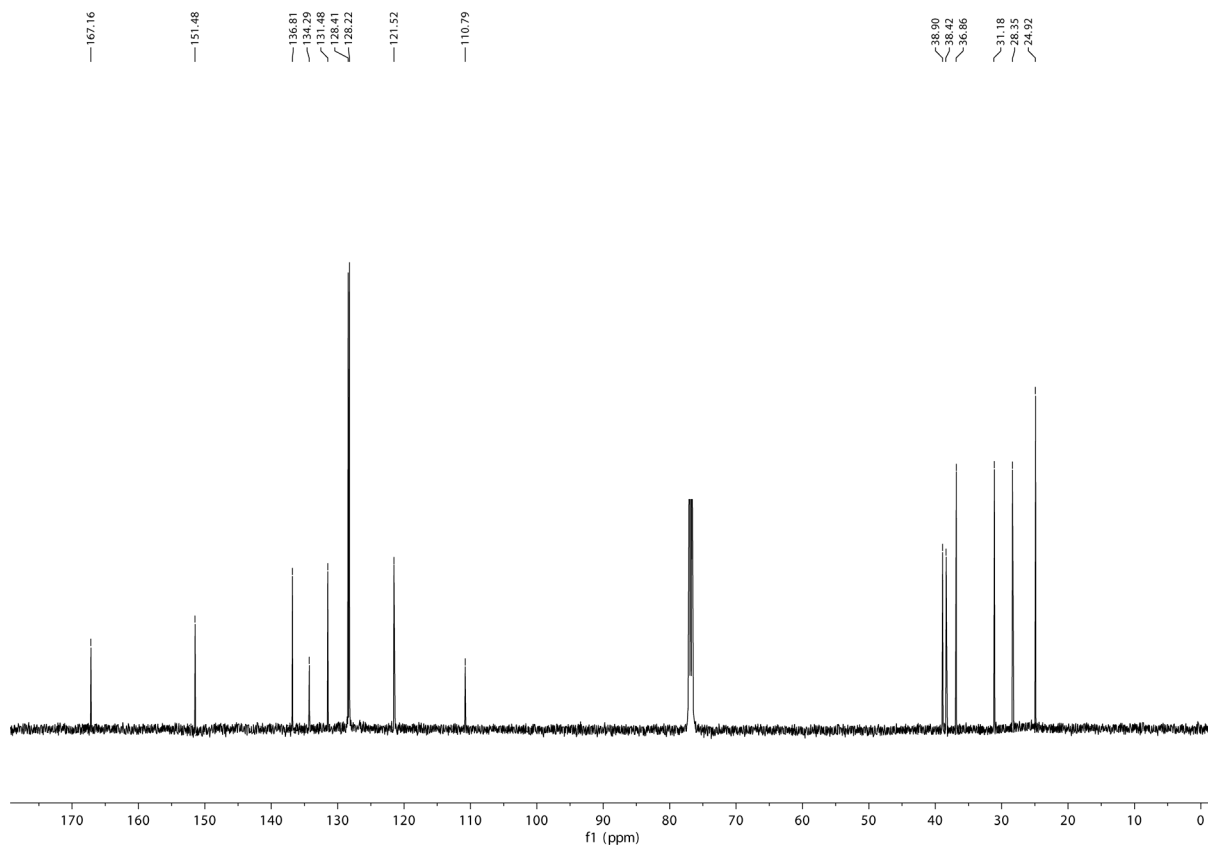



### 3.20. NMR of 4-bromo-N-((2-hydroxynaphthalen-1-yl)methyl)benzamide (4h) in CDCl<sub>3</sub>

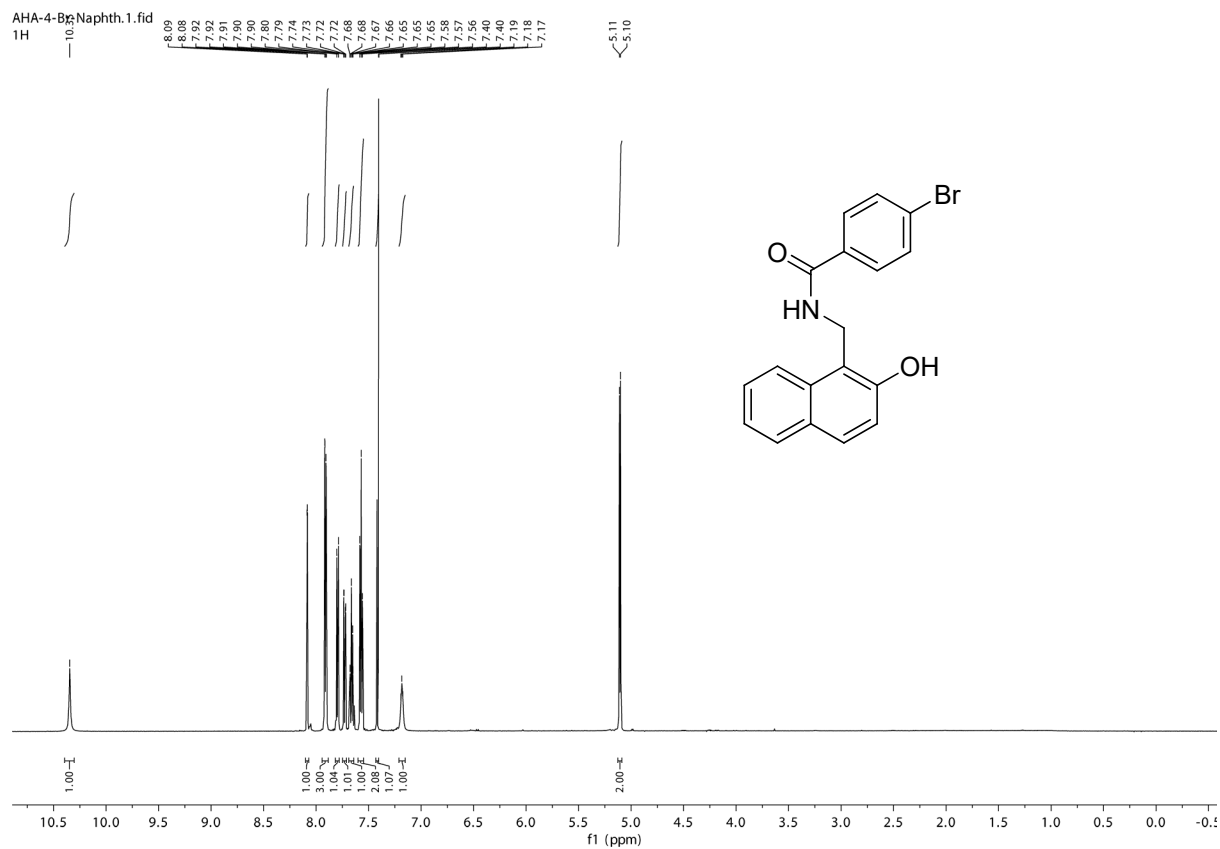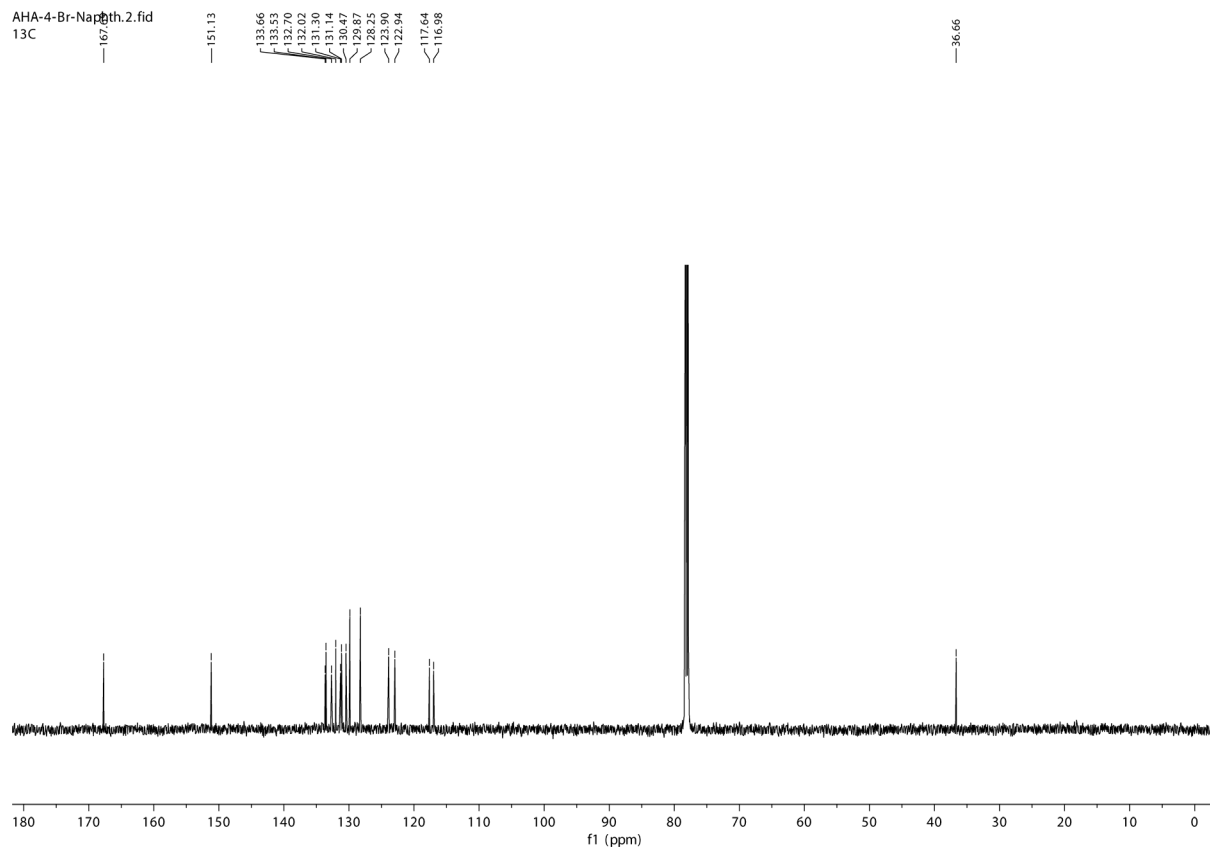

3.21. NMR of 4-chloro-*N*-((2-hydroxynaphthalen-1-yl)methyl)benzamide (4i)  
in CDCl<sub>3</sub>

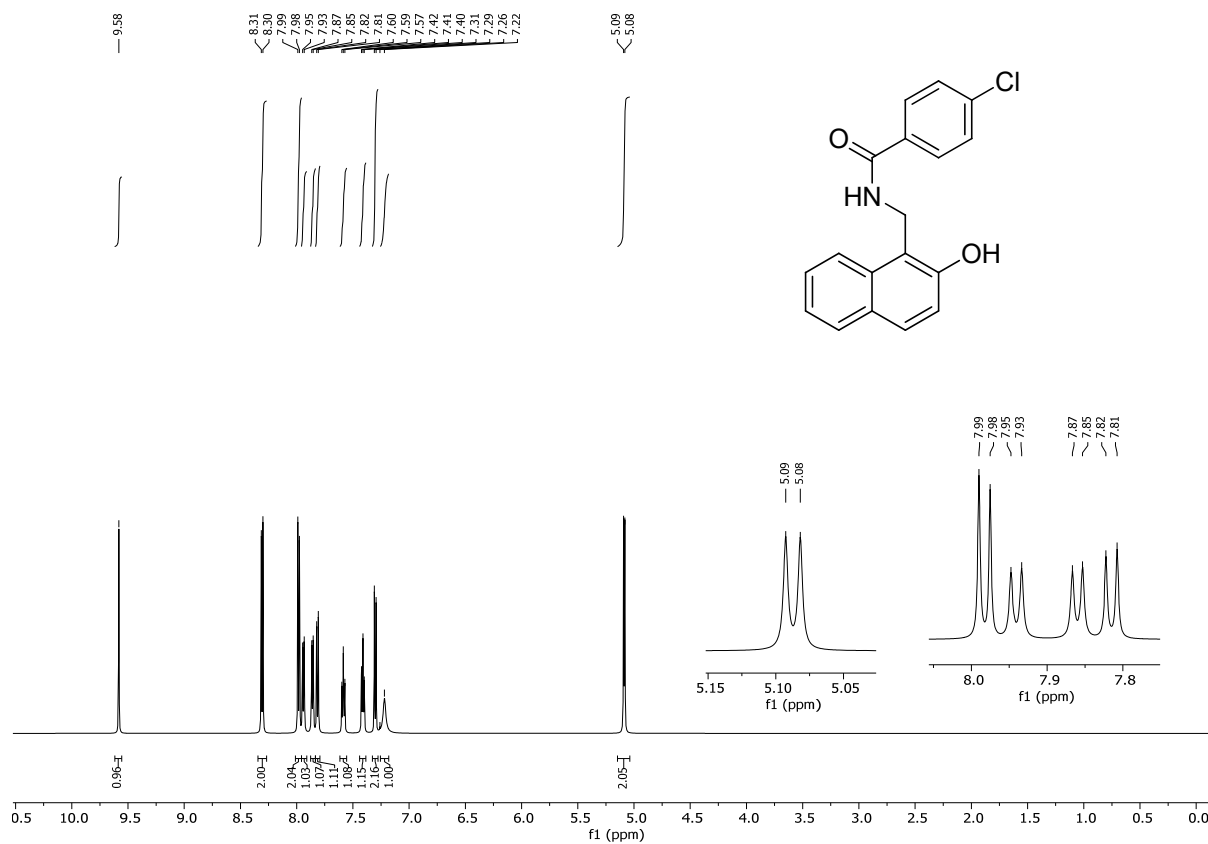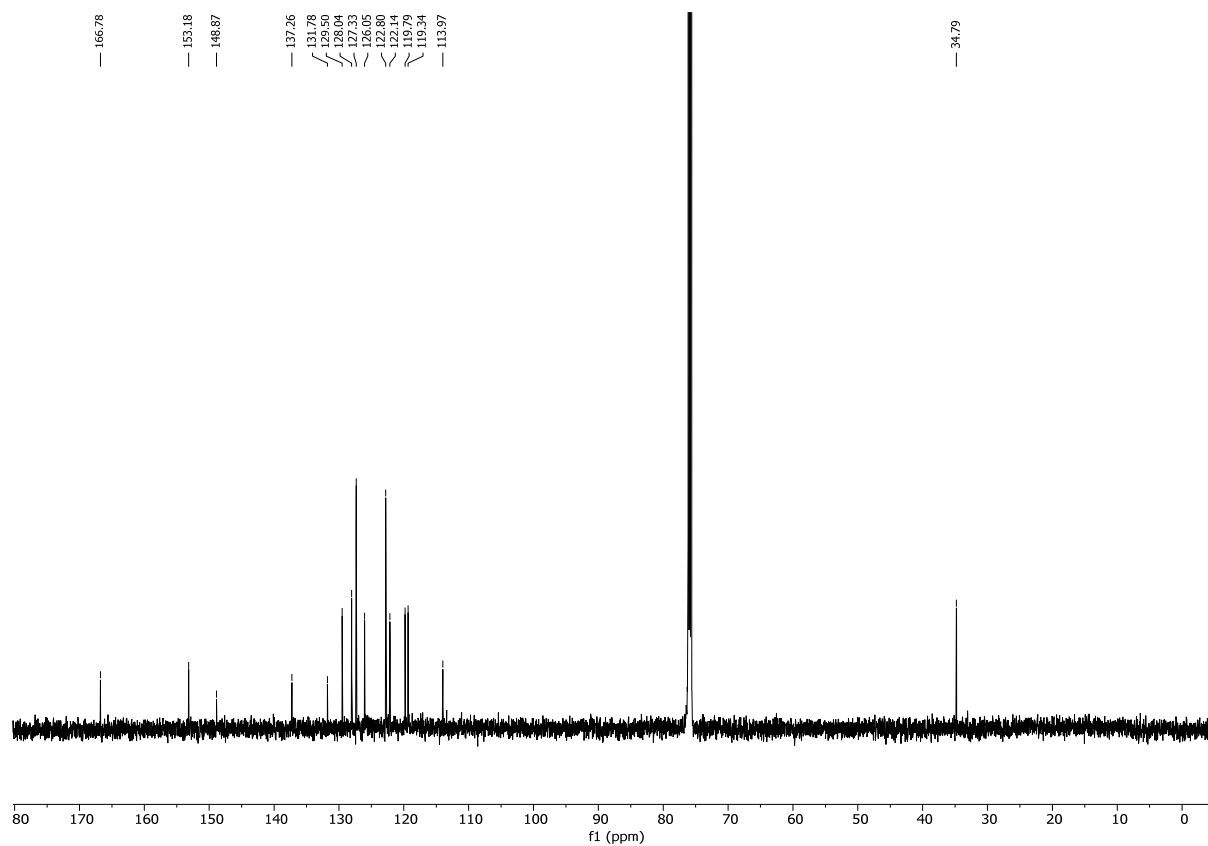

3.22. NMR of 4-fluoro-*N*-((2-hydroxynaphthalen-1-yl)methyl)benzamide (4j) in CDCl<sub>3</sub>

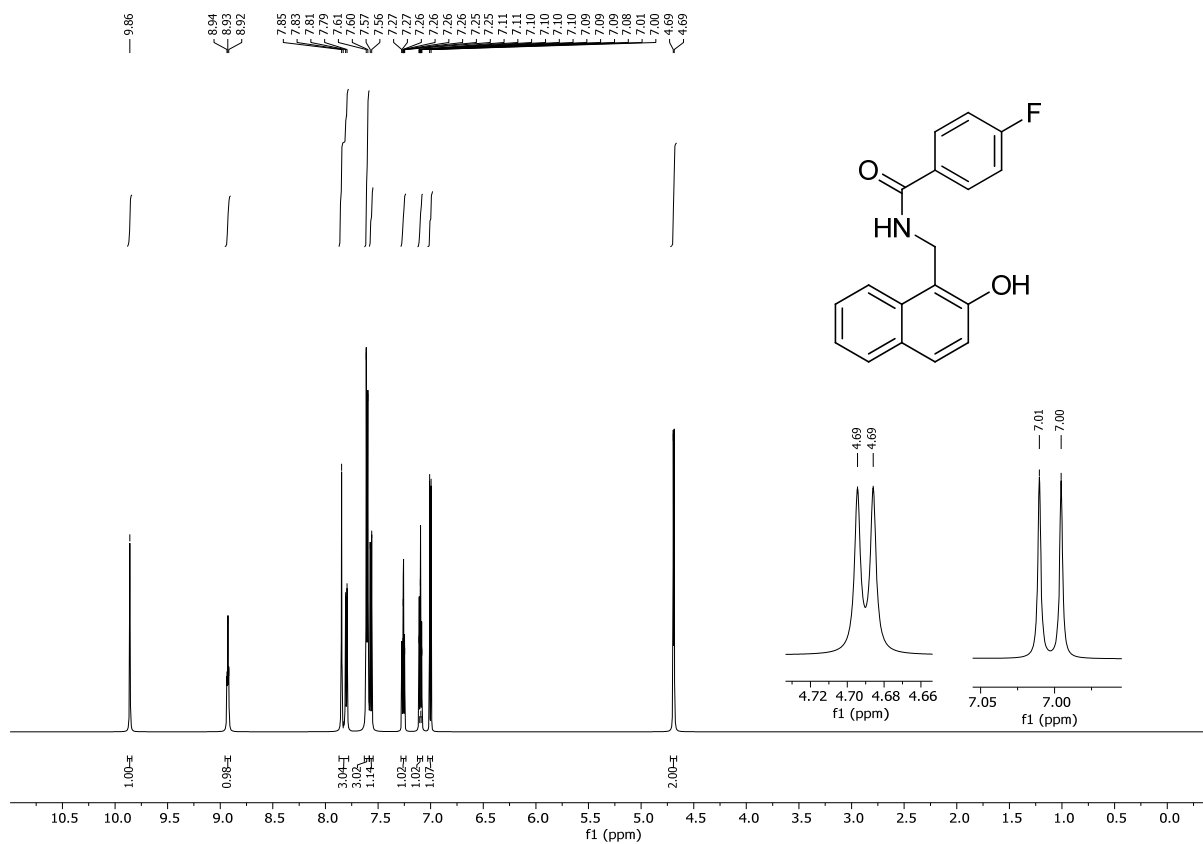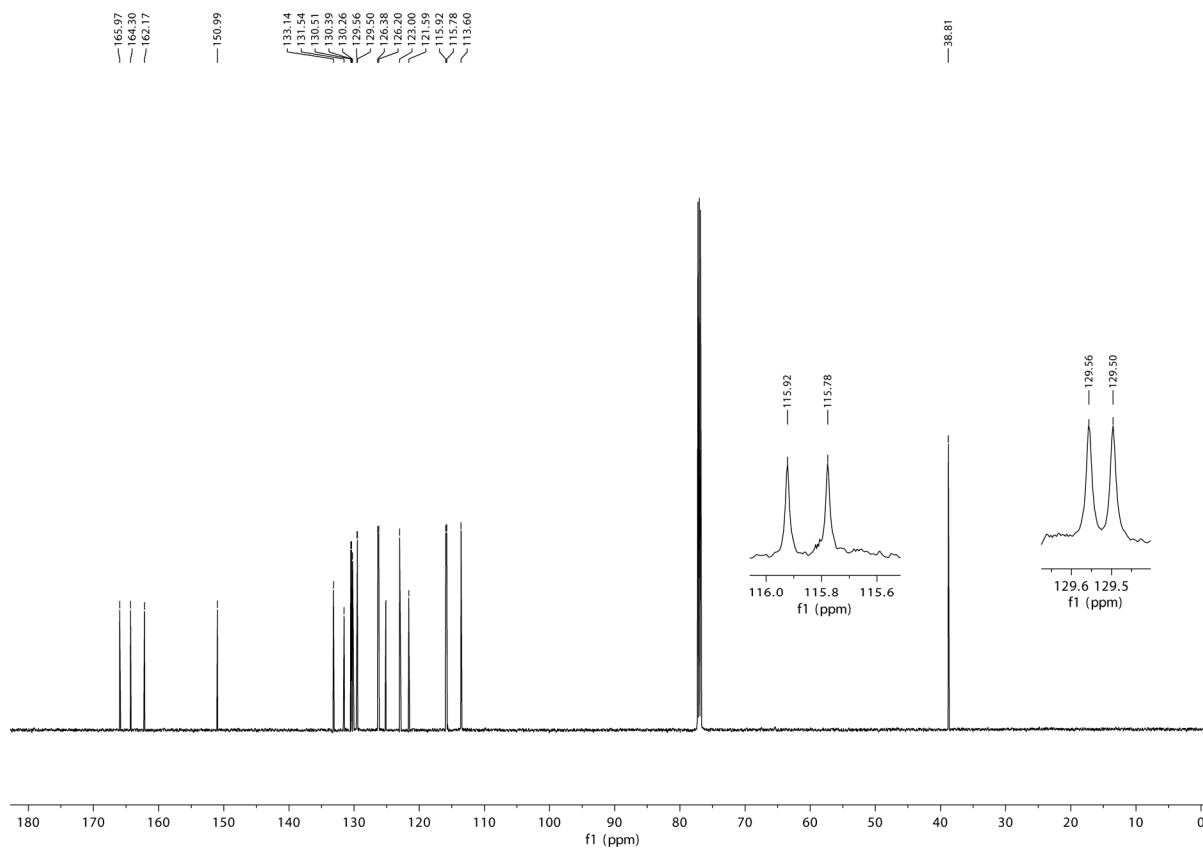

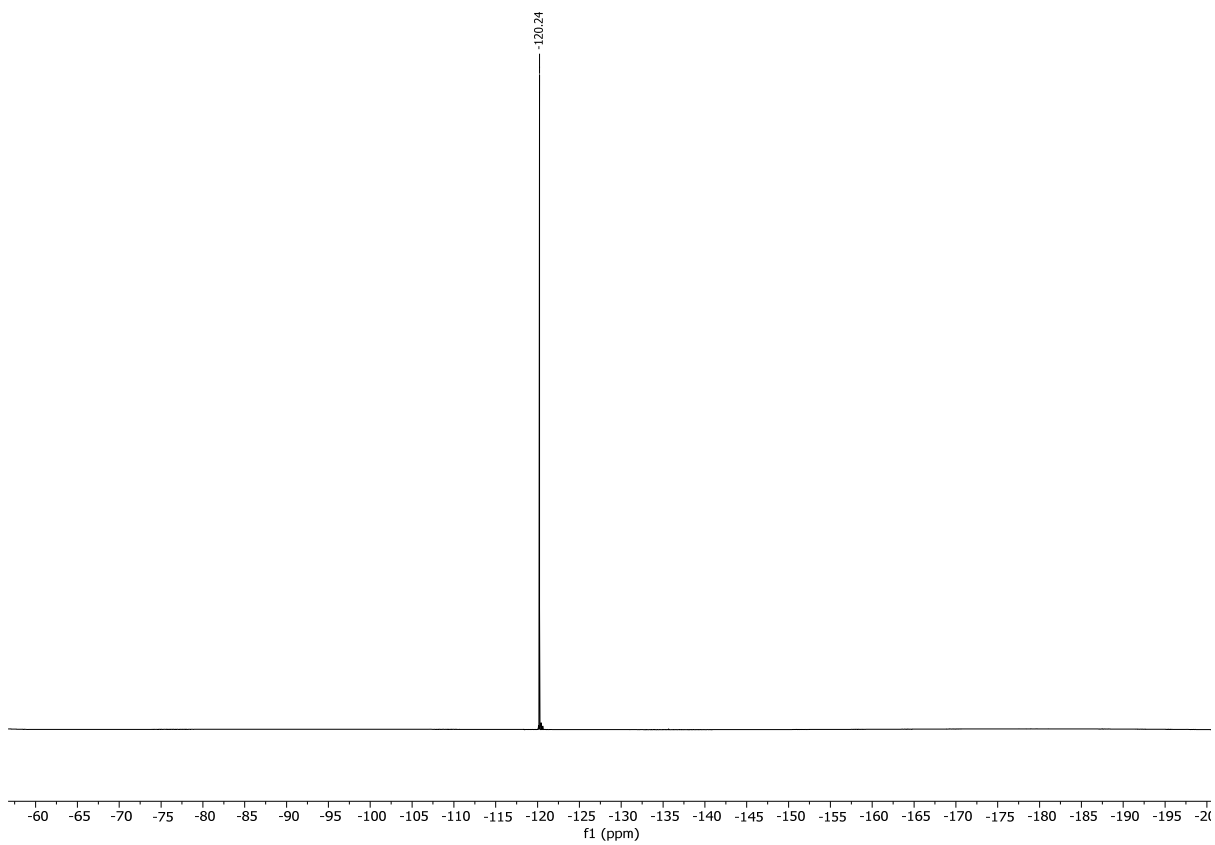

### 3.23. NMR of 2-bromo-N-((2-hydroxynaphthalen-1-yl)methyl)benzamide (4k) in CDCl<sub>3</sub>

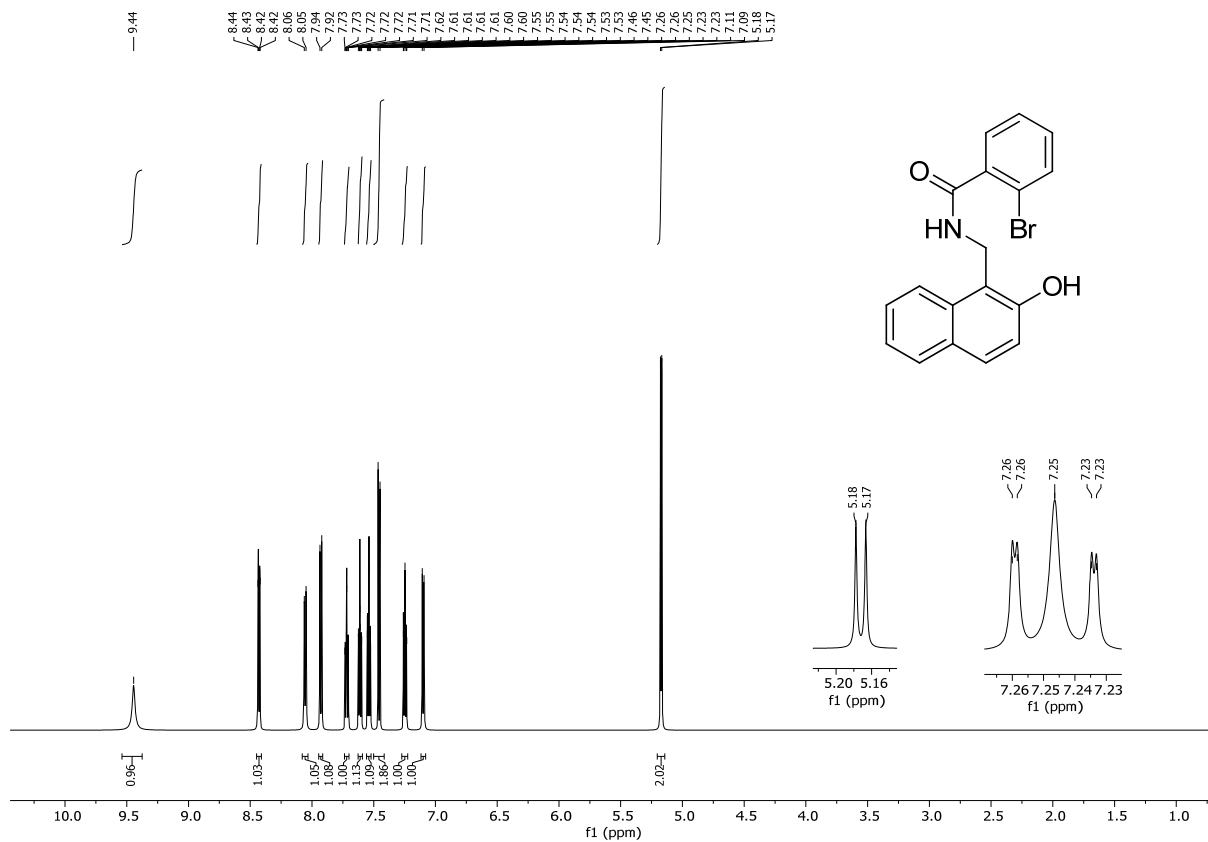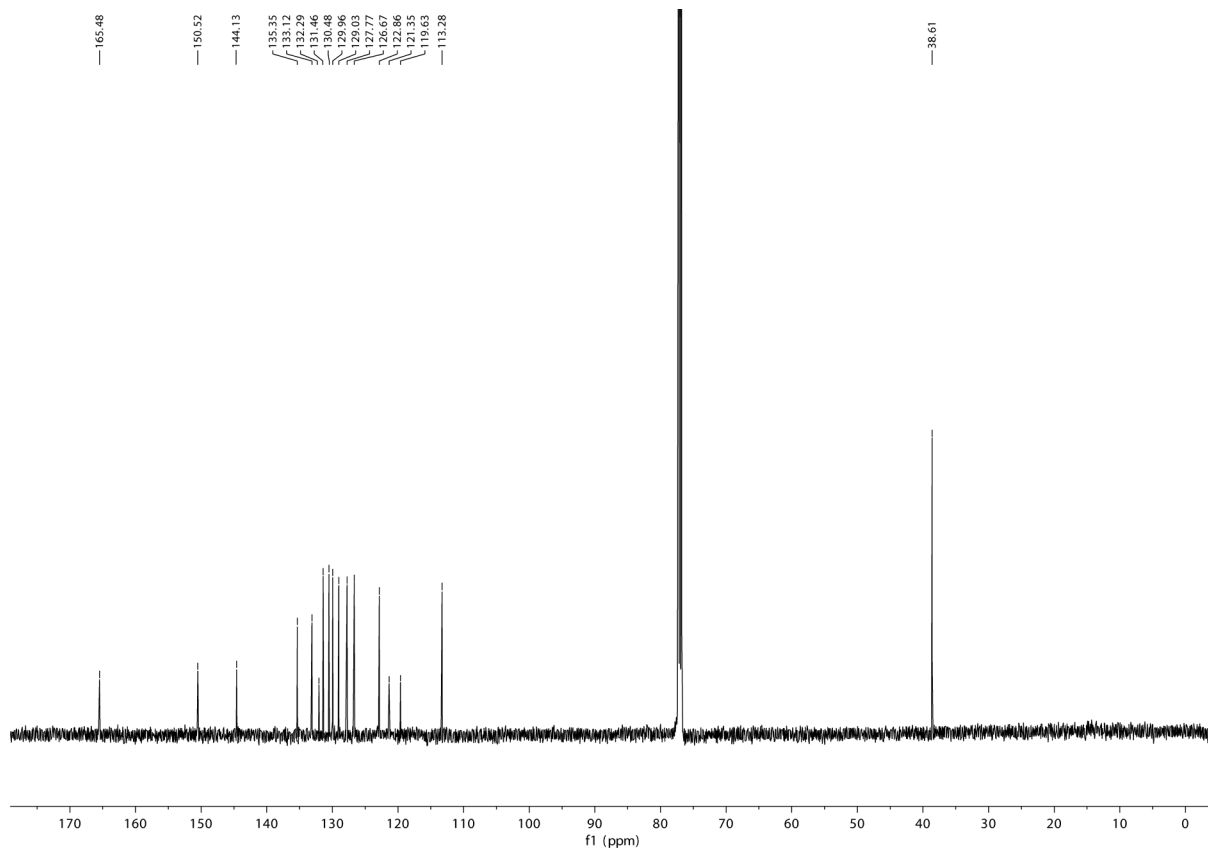

### 3.24. NMR of 3-bromo-*N*-((2-hydroxynaphthalen-1-yl)methyl)benzamide (4I) in CDCl<sub>3</sub>

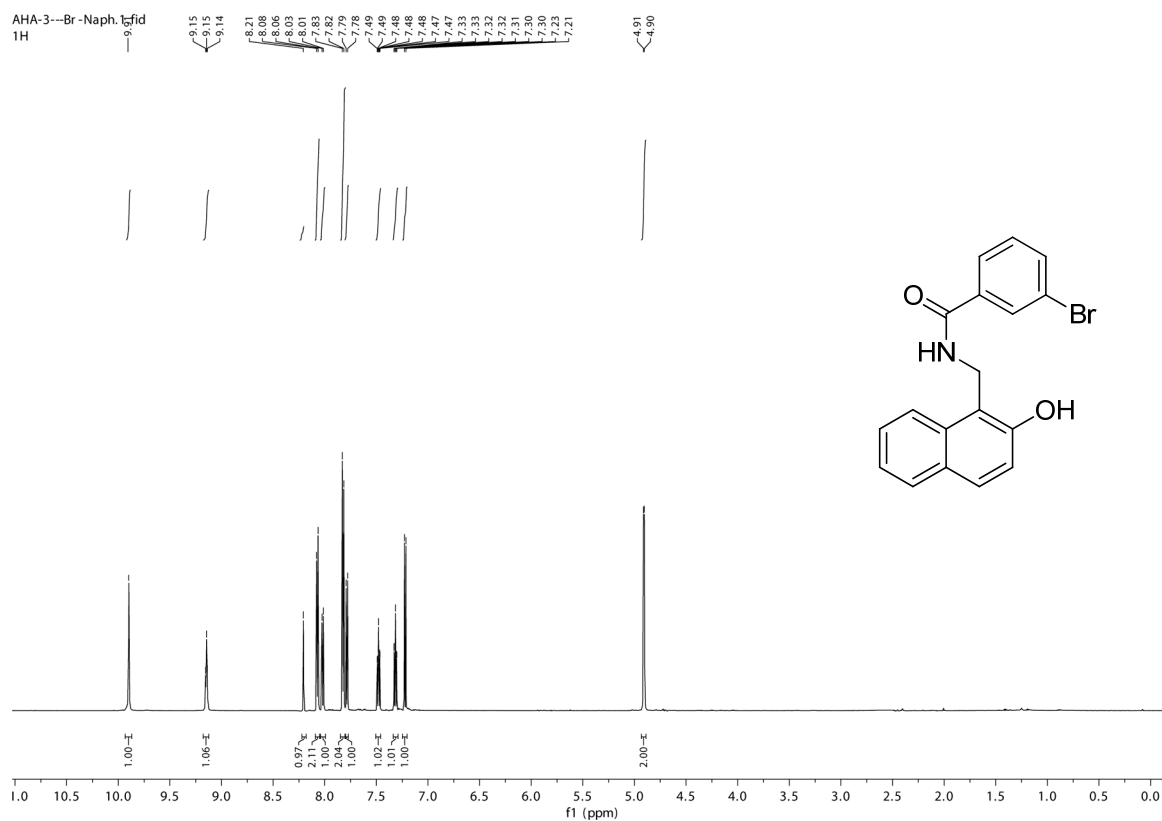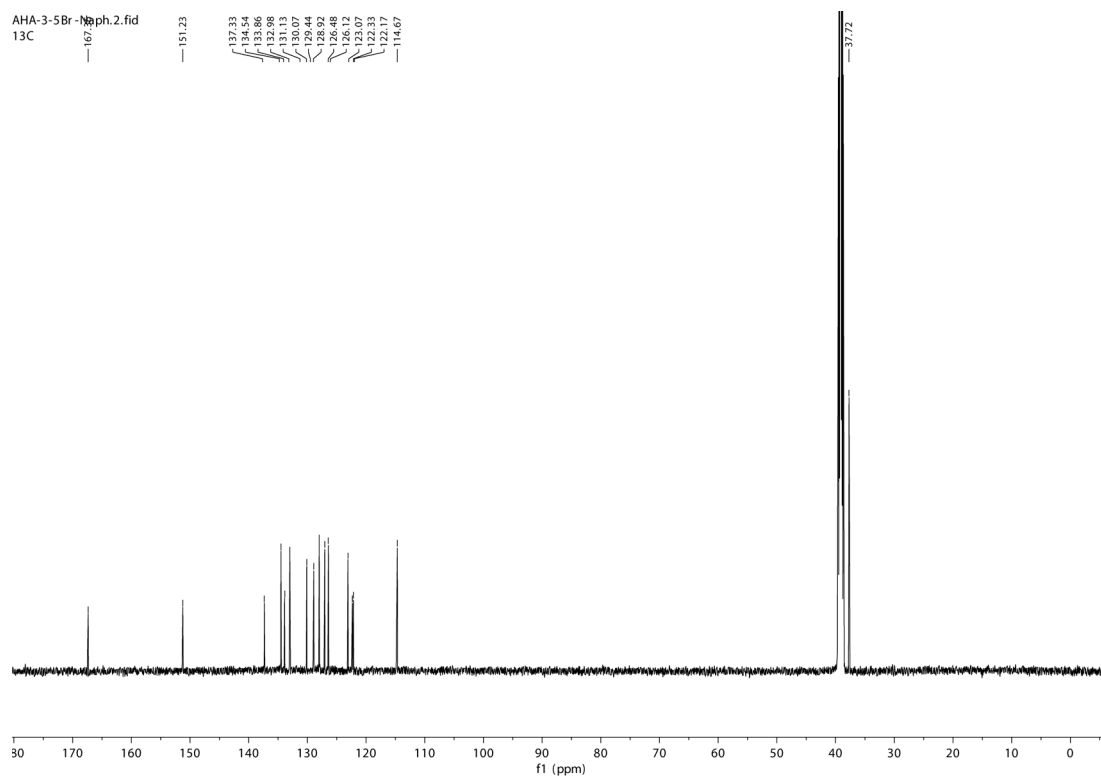

**3.25. NMR of 3,5-dibromo-N-((2-hydroxynaphthalen-1-yl)methyl) benzamide (4m) in CDCl<sub>3</sub>**

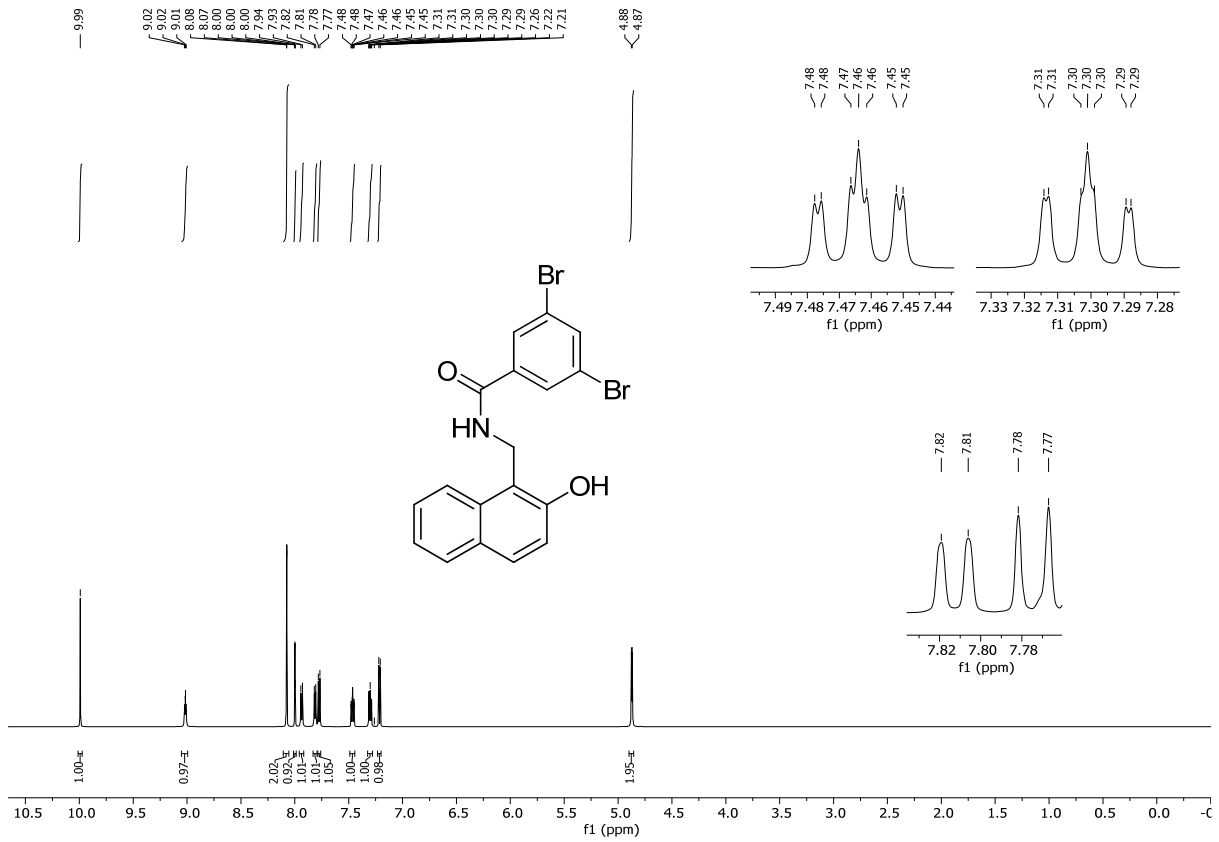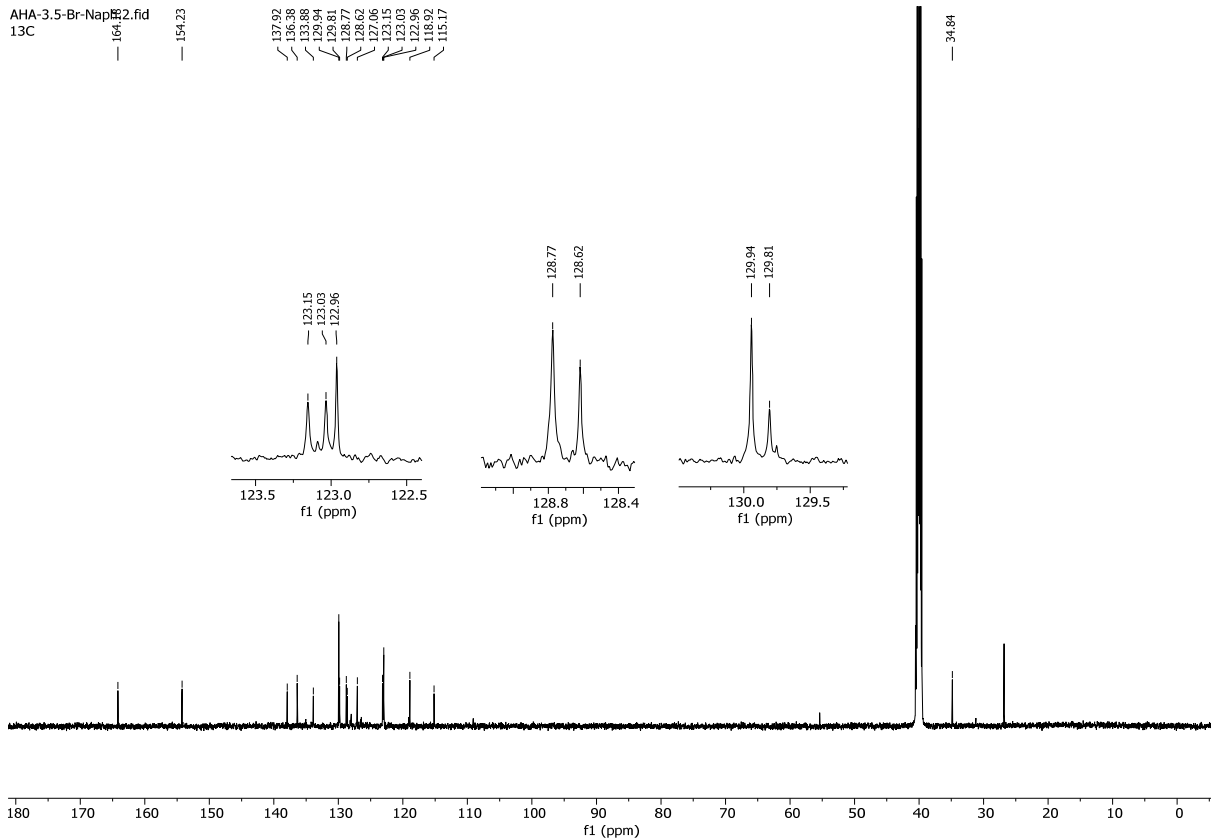

3.26. NMR of *N*-((2-hydroxynaphthalen-1-yl)methyl)-4-(trifluoromethyl)benzamide (4n) in CDCl<sub>3</sub>

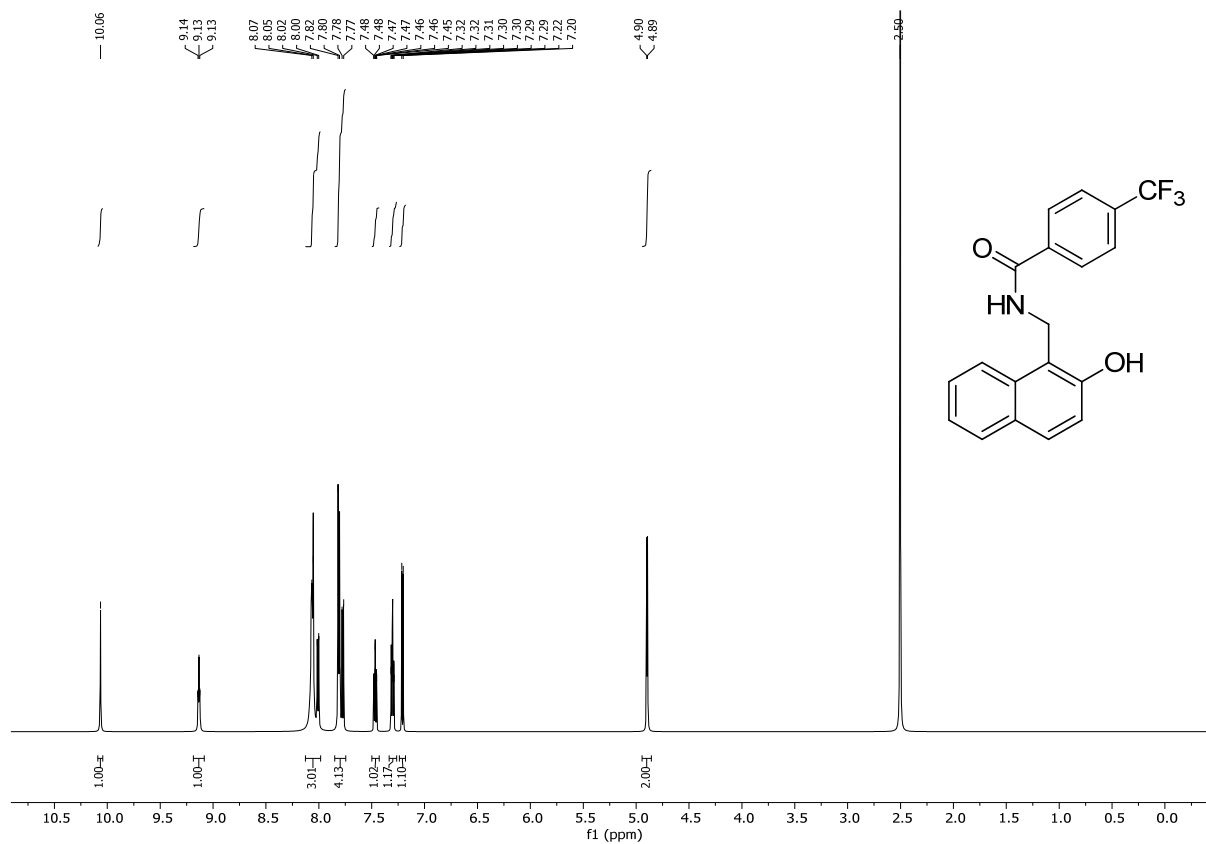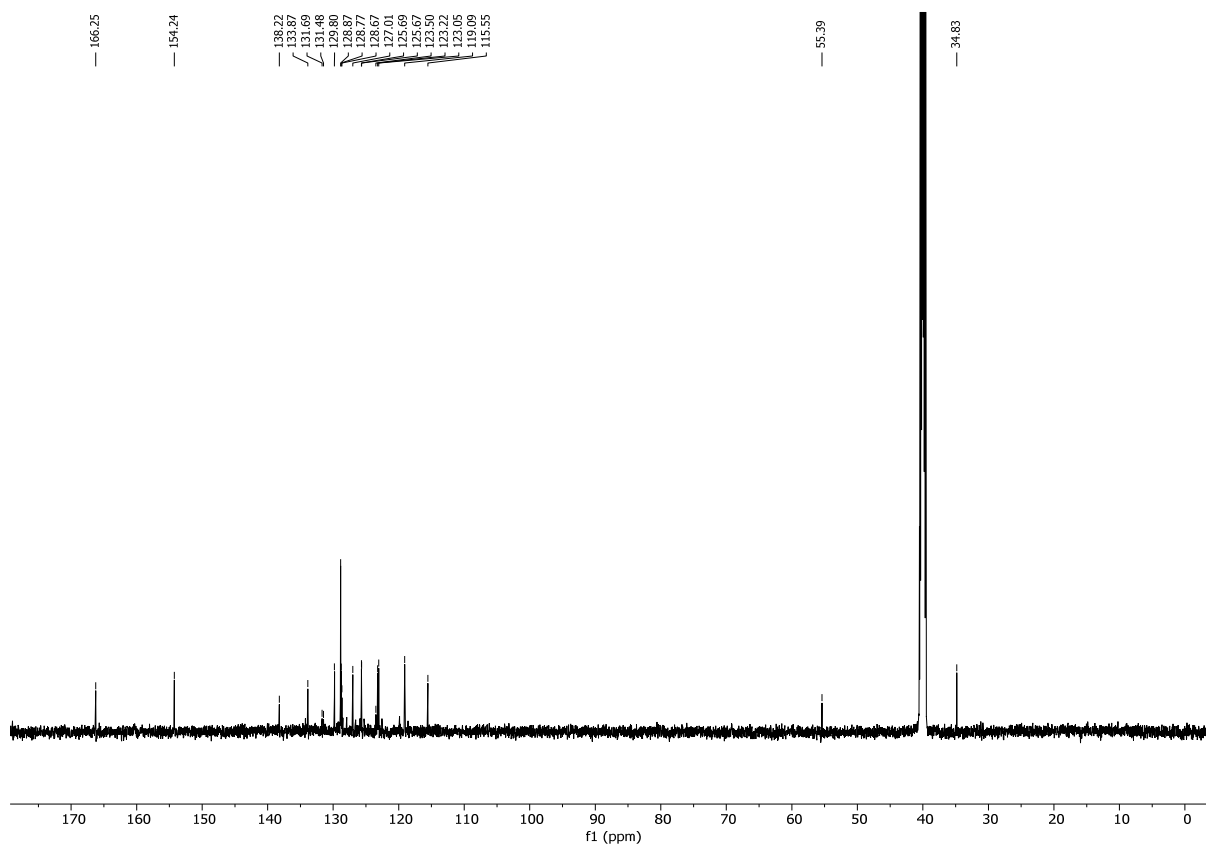



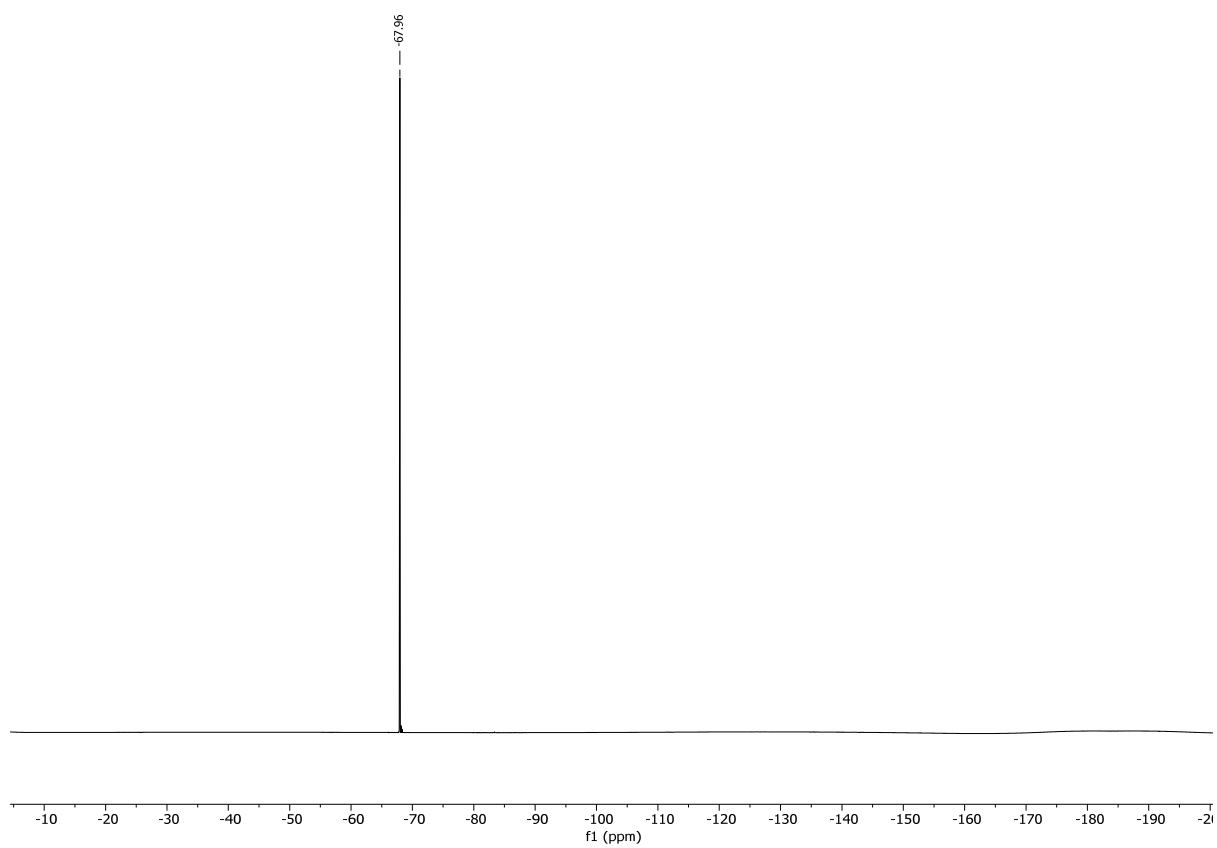

3.27. NMR of *N*-((2-hydroxynaphthalen-1-yl)methyl)-4-nitrobenzamide (4o) in CDCl<sub>3</sub>

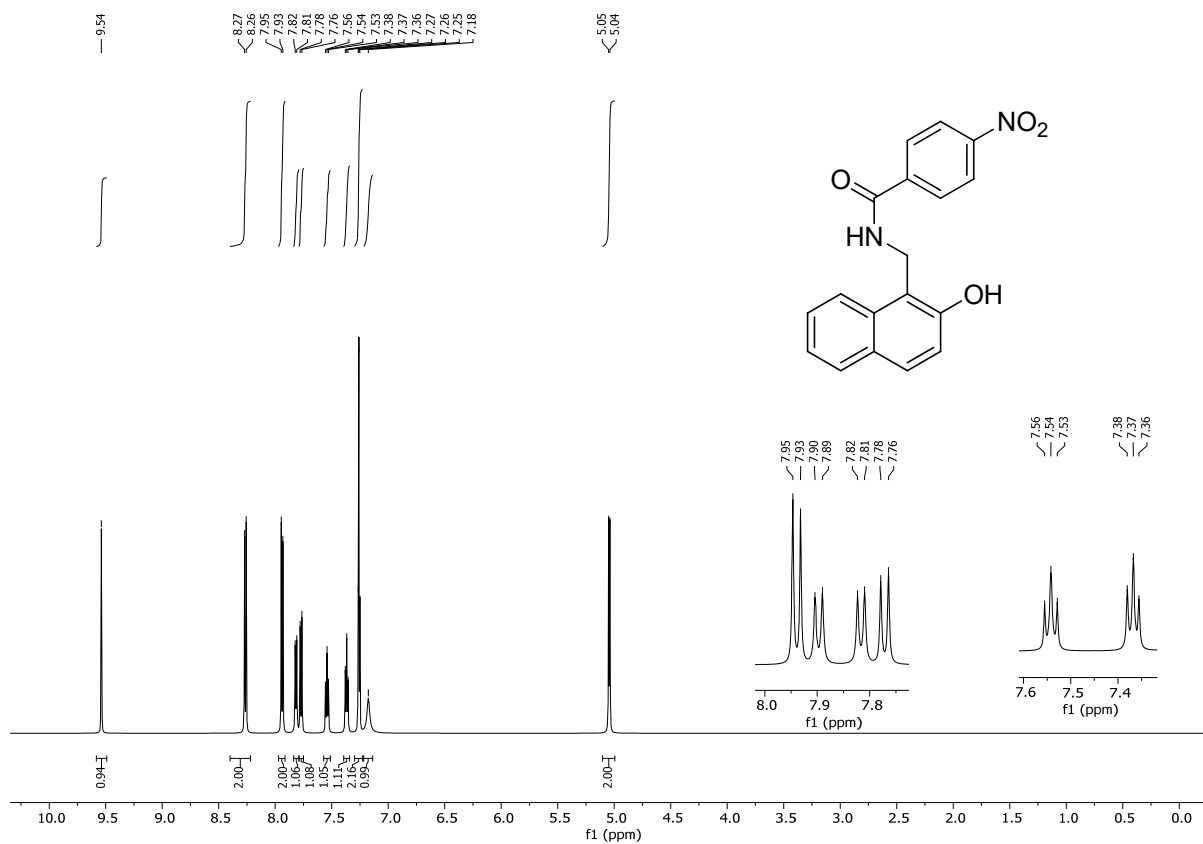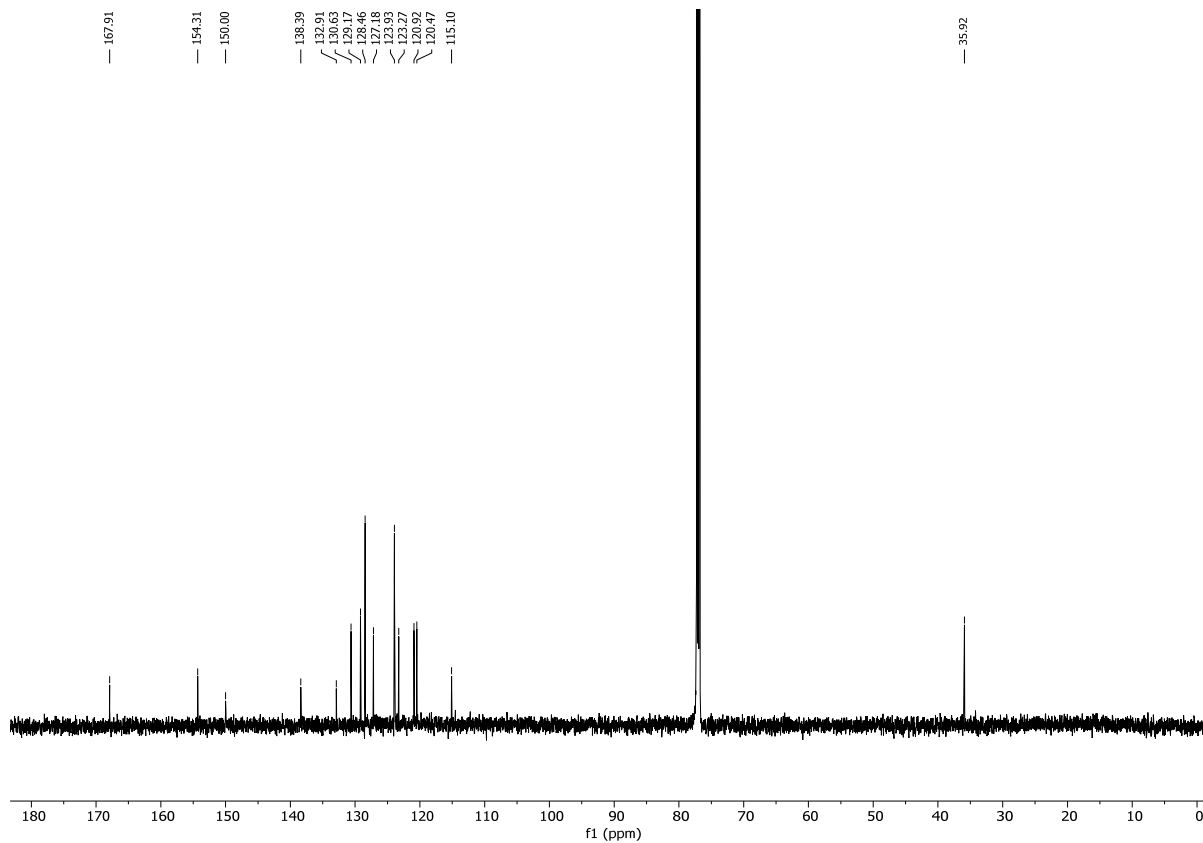

3.28. NMR of *N*-((2-hydroxynaphthalen-1-yl)methyl)-4-methoxy benzamide (4p) in CDCl<sub>3</sub>

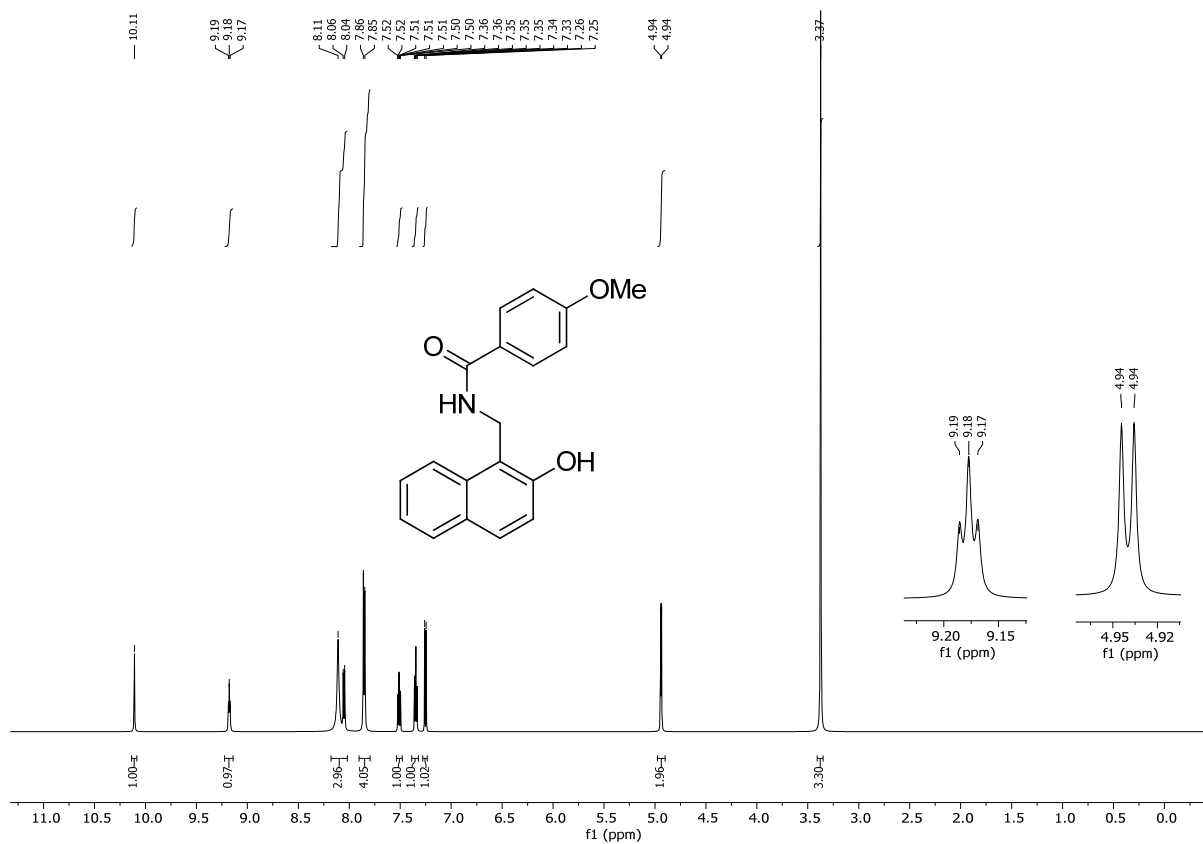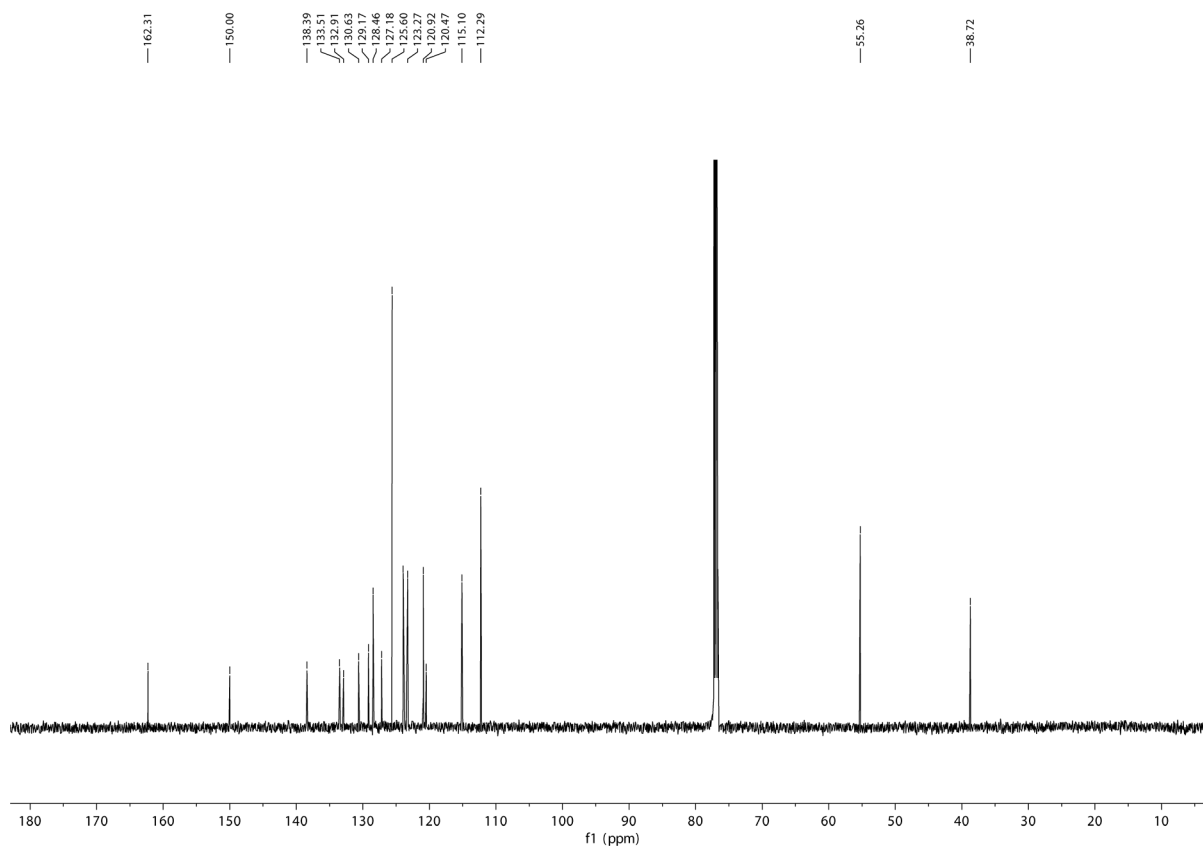



### 3.30. NMR of *N*-((2-hydroxynaphthalen-1-yl)methyl)-3,4,5-trimethoxybenzamide (4r) in CDCl<sub>3</sub>

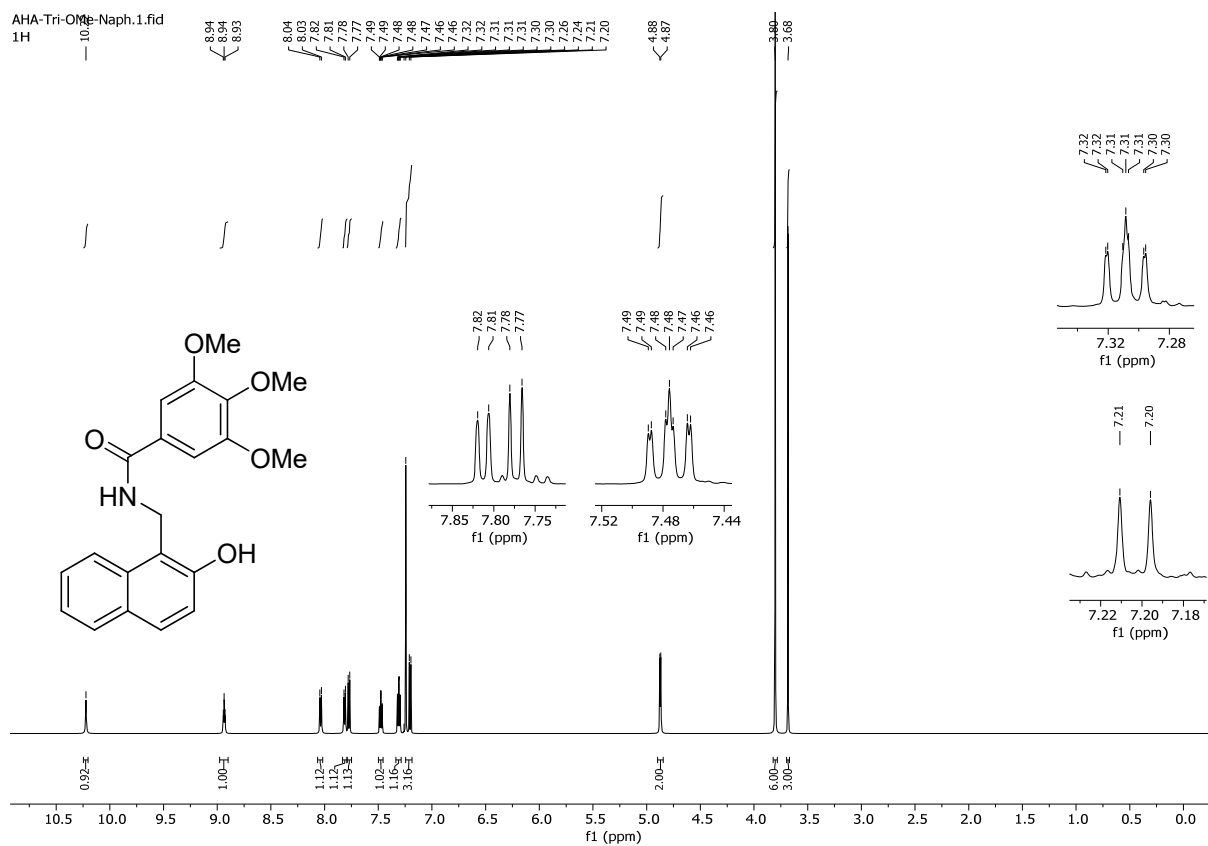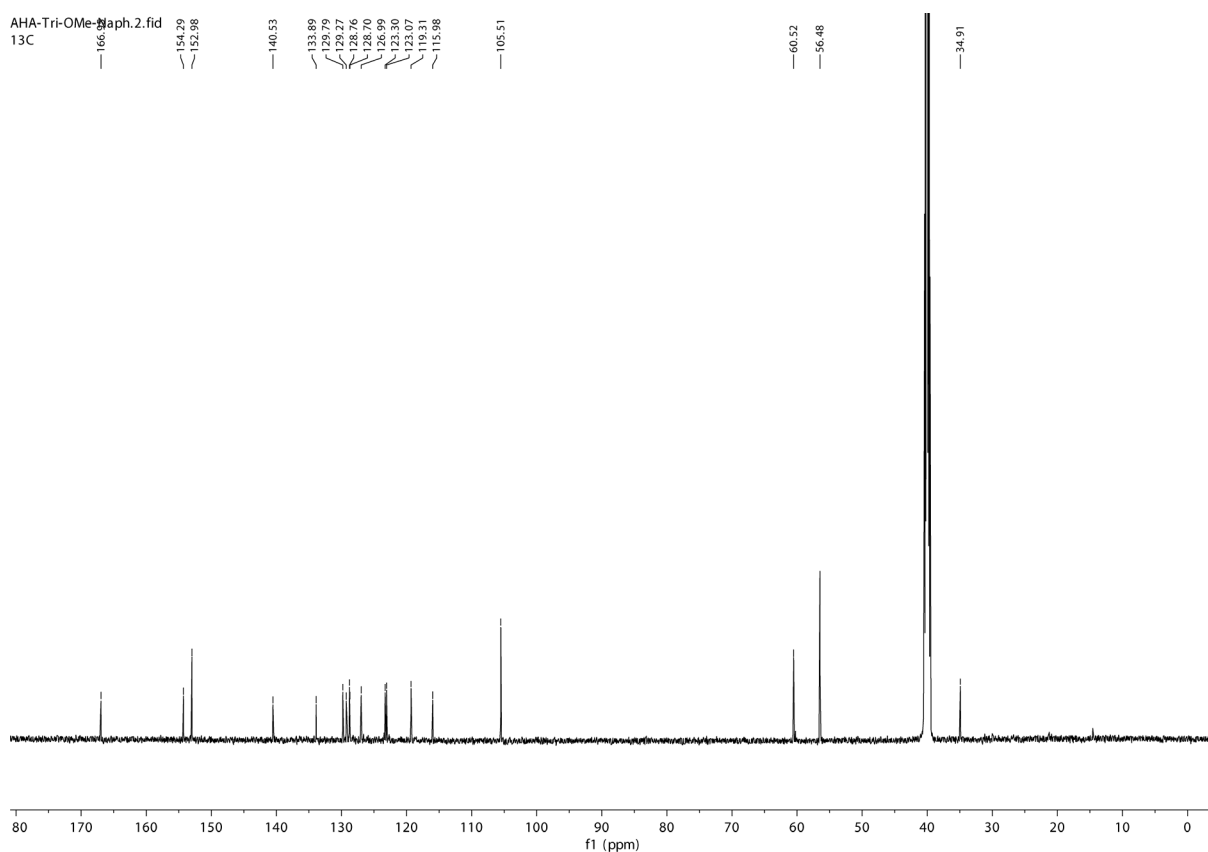

### 3.31. NMR of *N*-((2-hydroxynaphthalen-1-yl)methyl)picolinamide (4s) in CDCl<sub>3</sub>

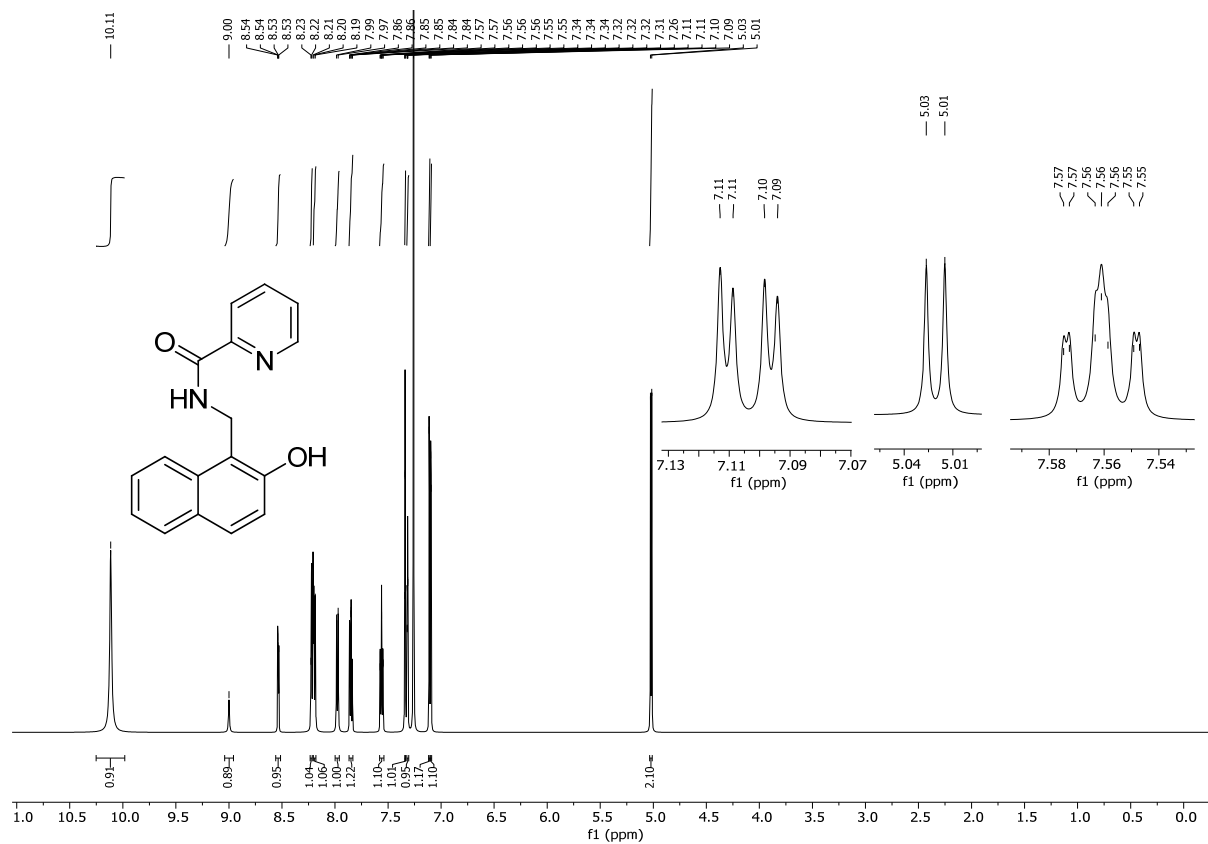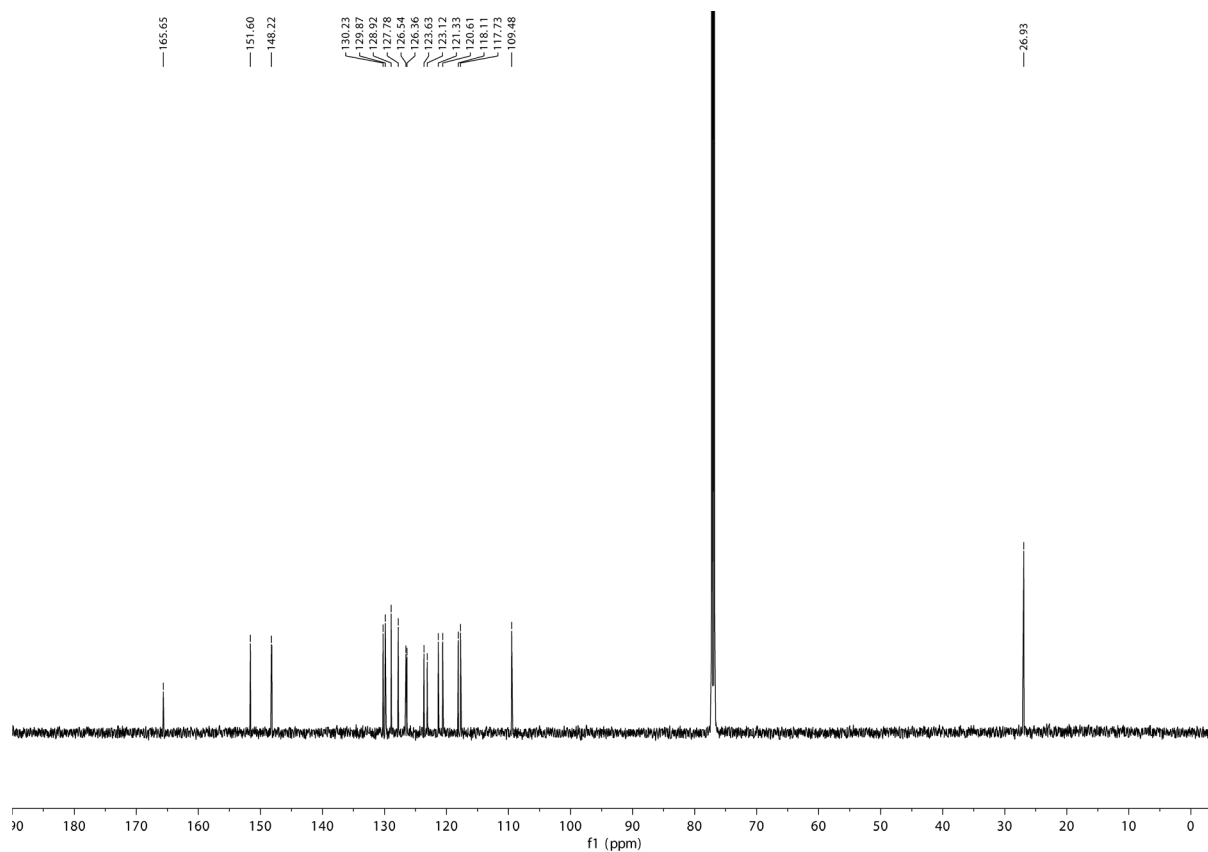

3.32. NMR of (S)-2'-phenyl-2*H*,4'*H*-spiro[naphthalene-1,5'-oxazol]-2-one (5a)  
in CDCl<sub>3</sub>

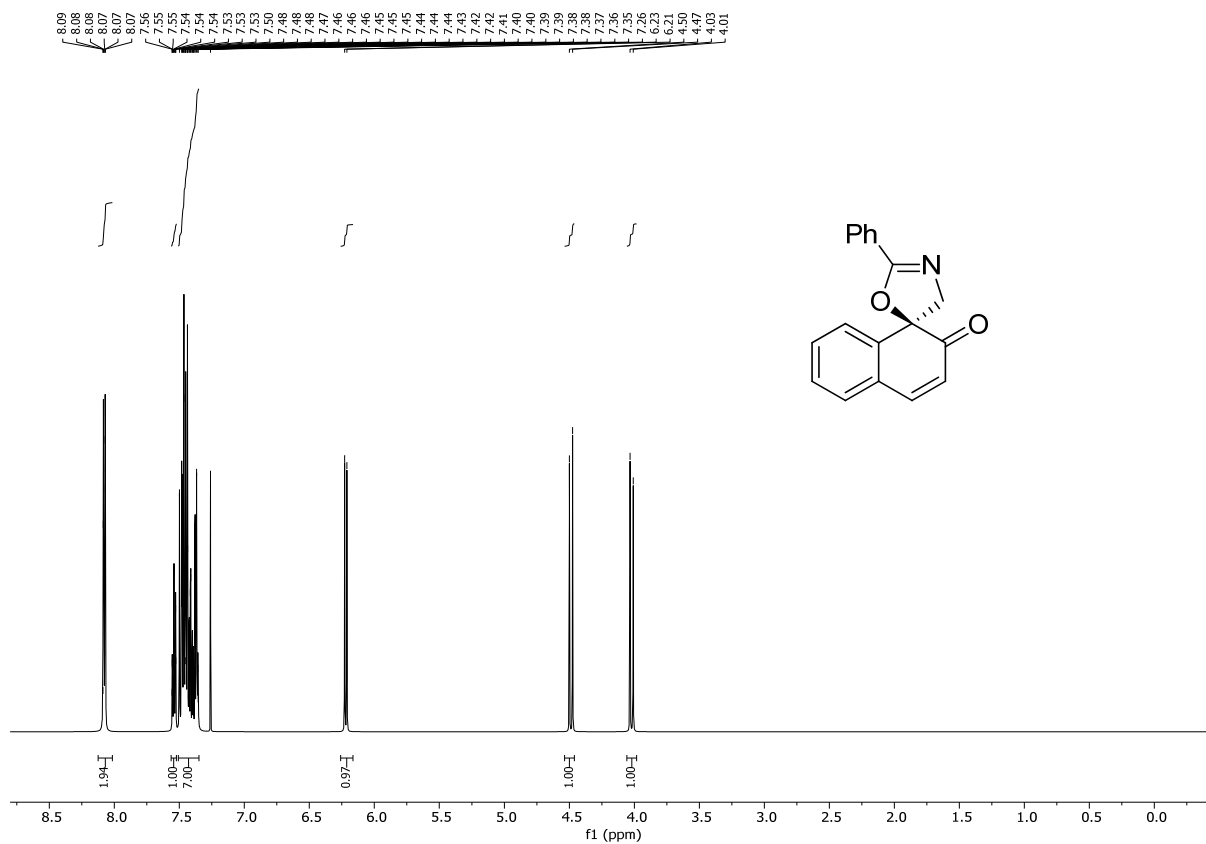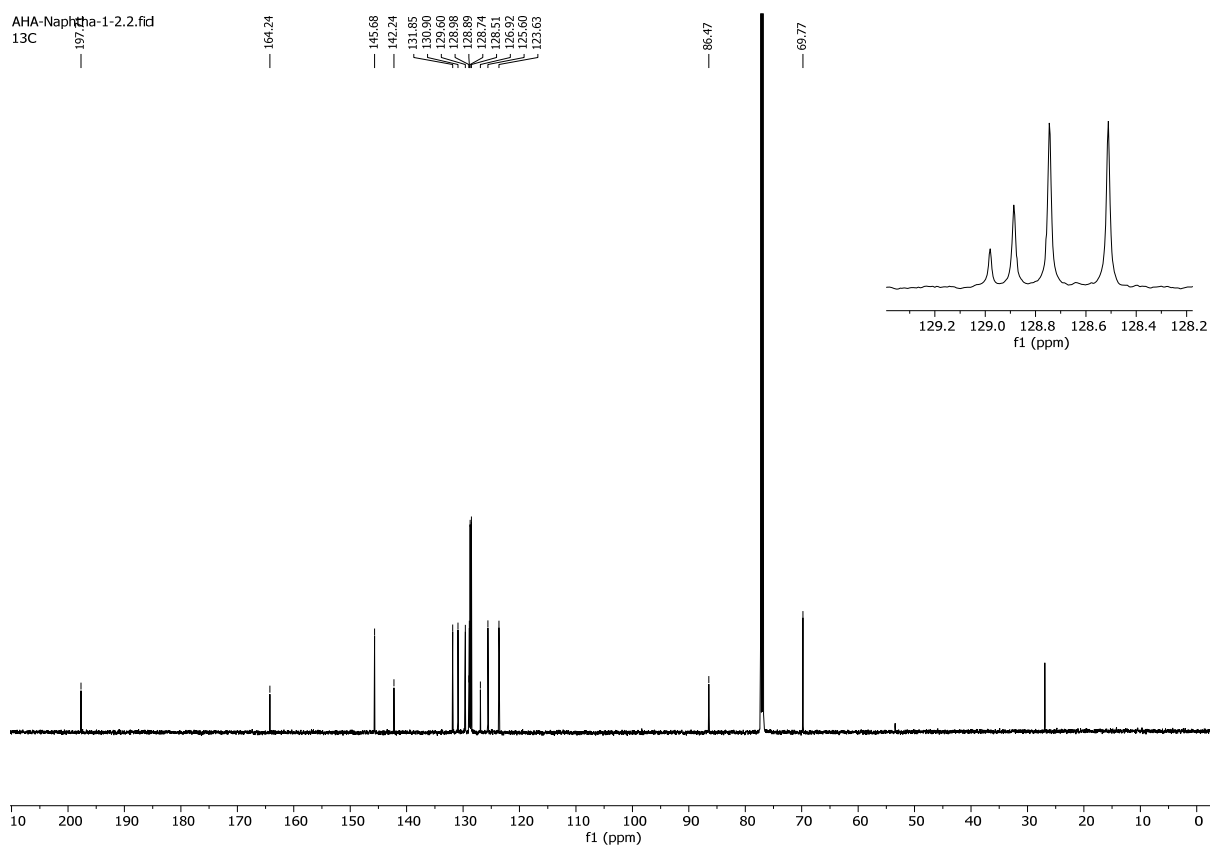

**3.33. NMR of (S)-6-bromo-2'-phenyl-2H,4'H-spiro[naphthalene-1,5'-oxazol]-2-one (5b) in CDCl<sub>3</sub>**

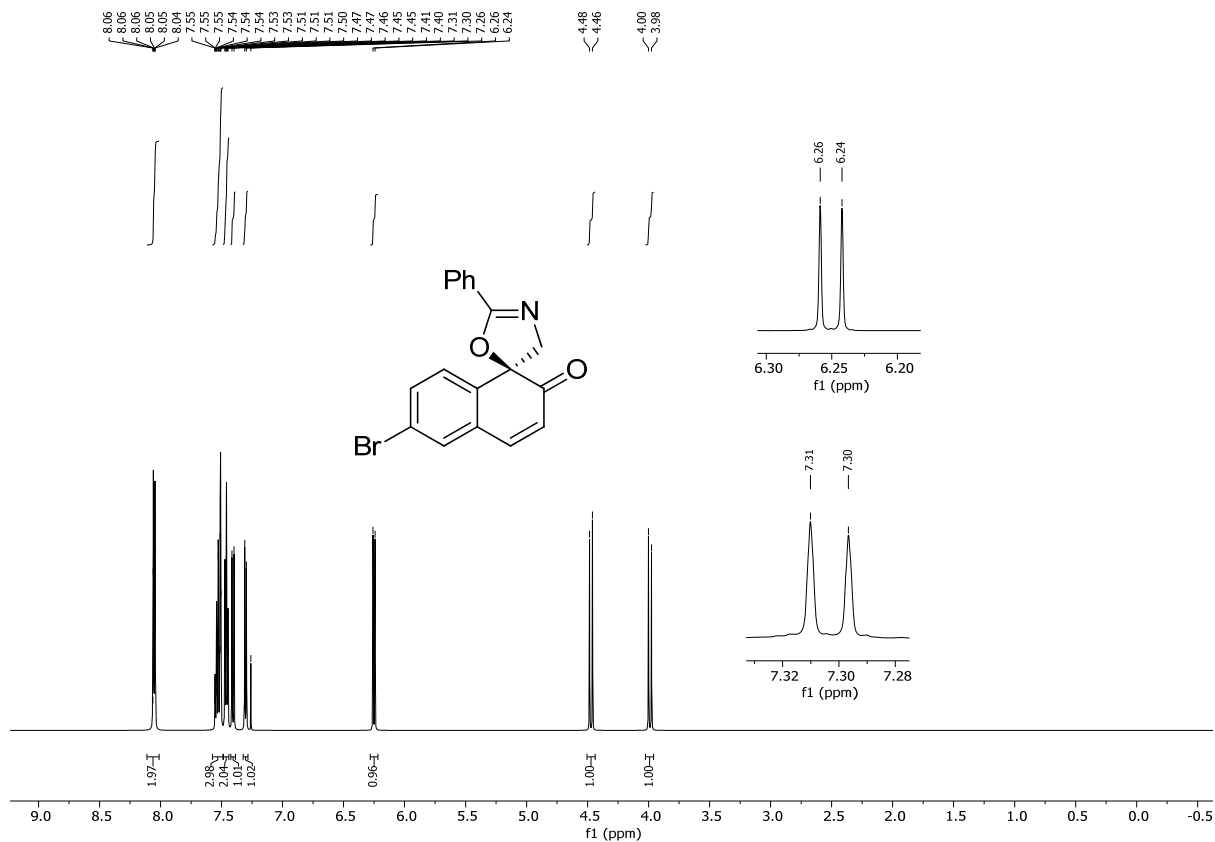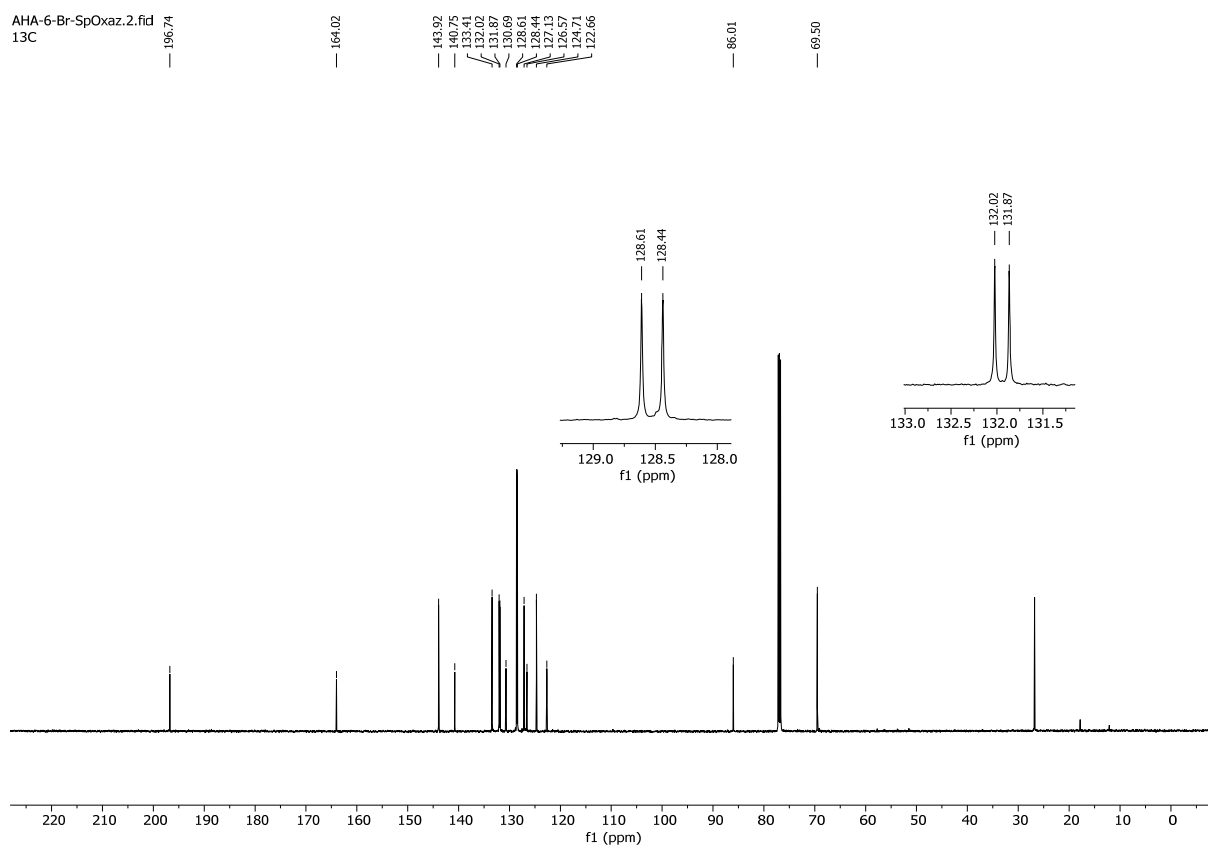



3.34. NMR of (S)-7-methoxy-2'-phenyl-2*H*,4'*H*-spiro[naphthalene-1,5'-oxazol]-2-one (5c) in CDCl<sub>3</sub>

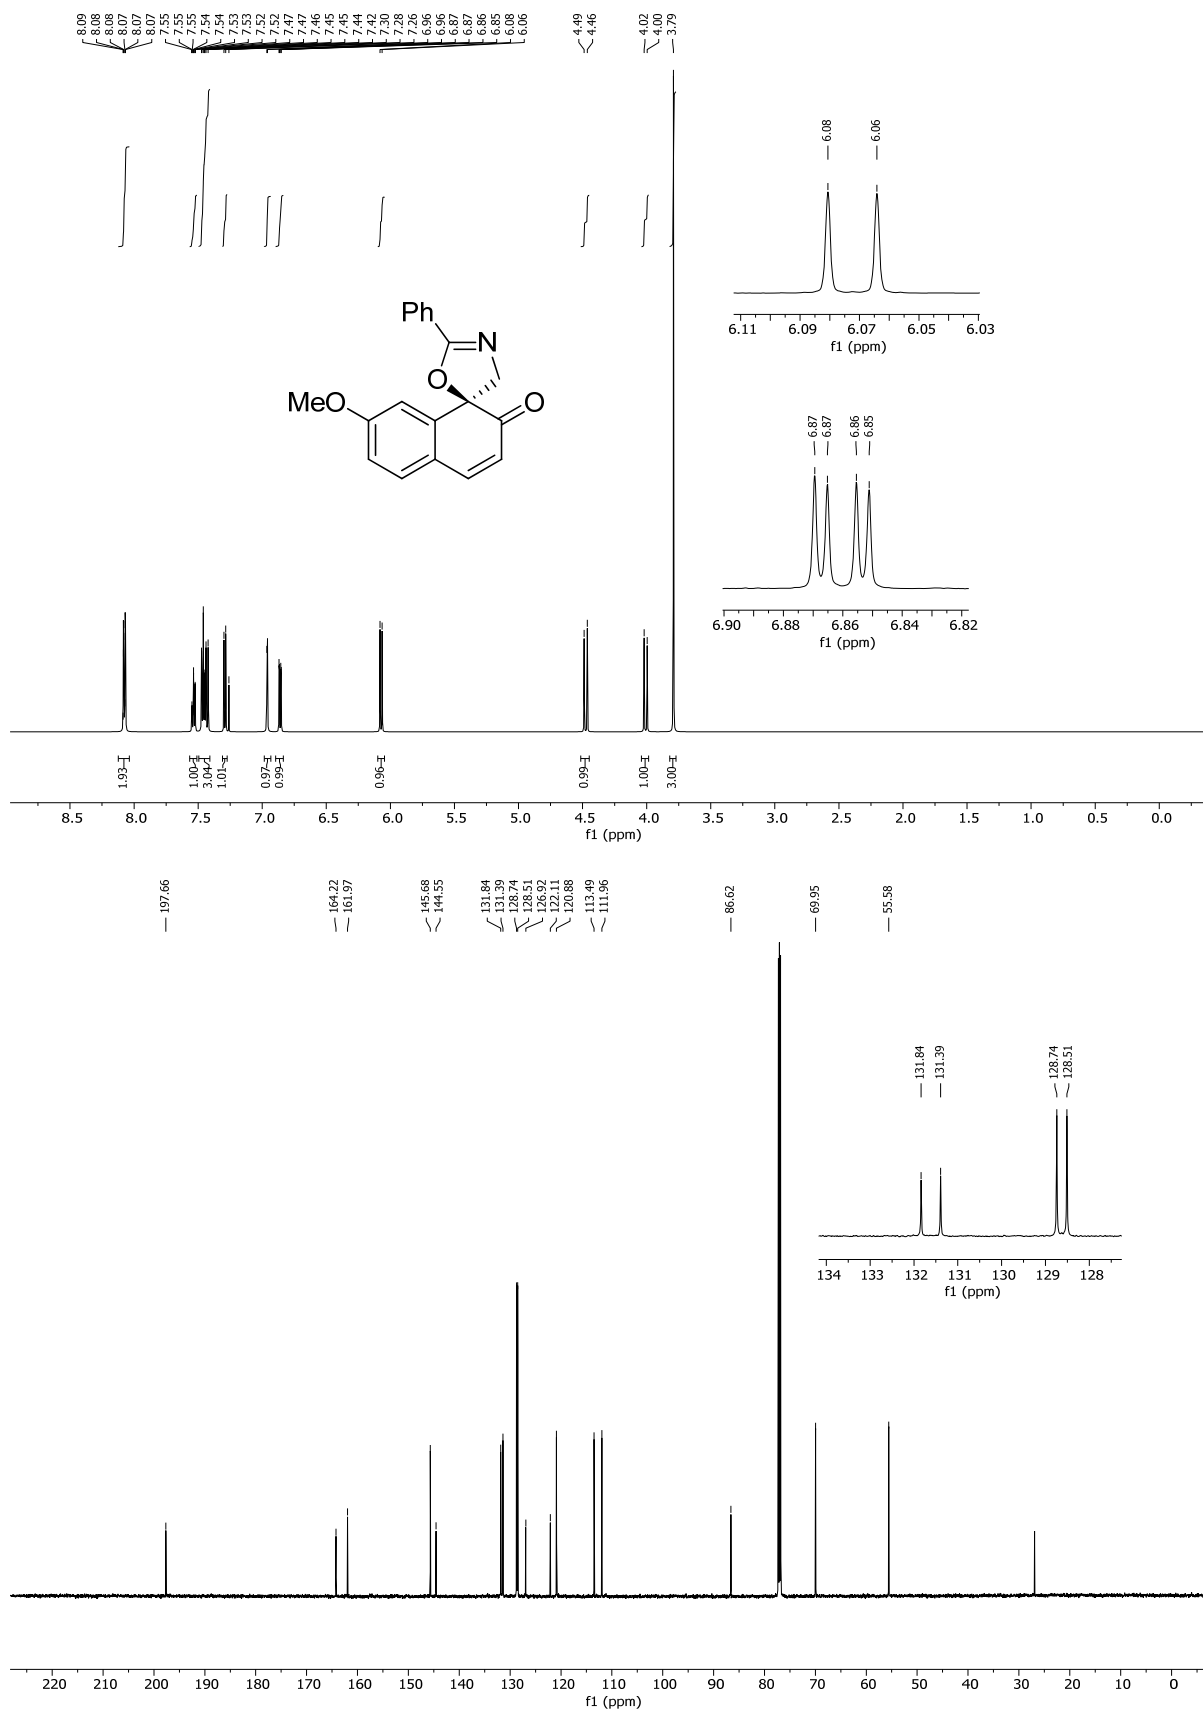

**3.35. NMR of (S)-7-hydroxy-2'-phenyl-2*H*,4'*H*-spiro[naphthalene-1,5'-oxazol]-2-one (5d) in CDCl<sub>3</sub>**

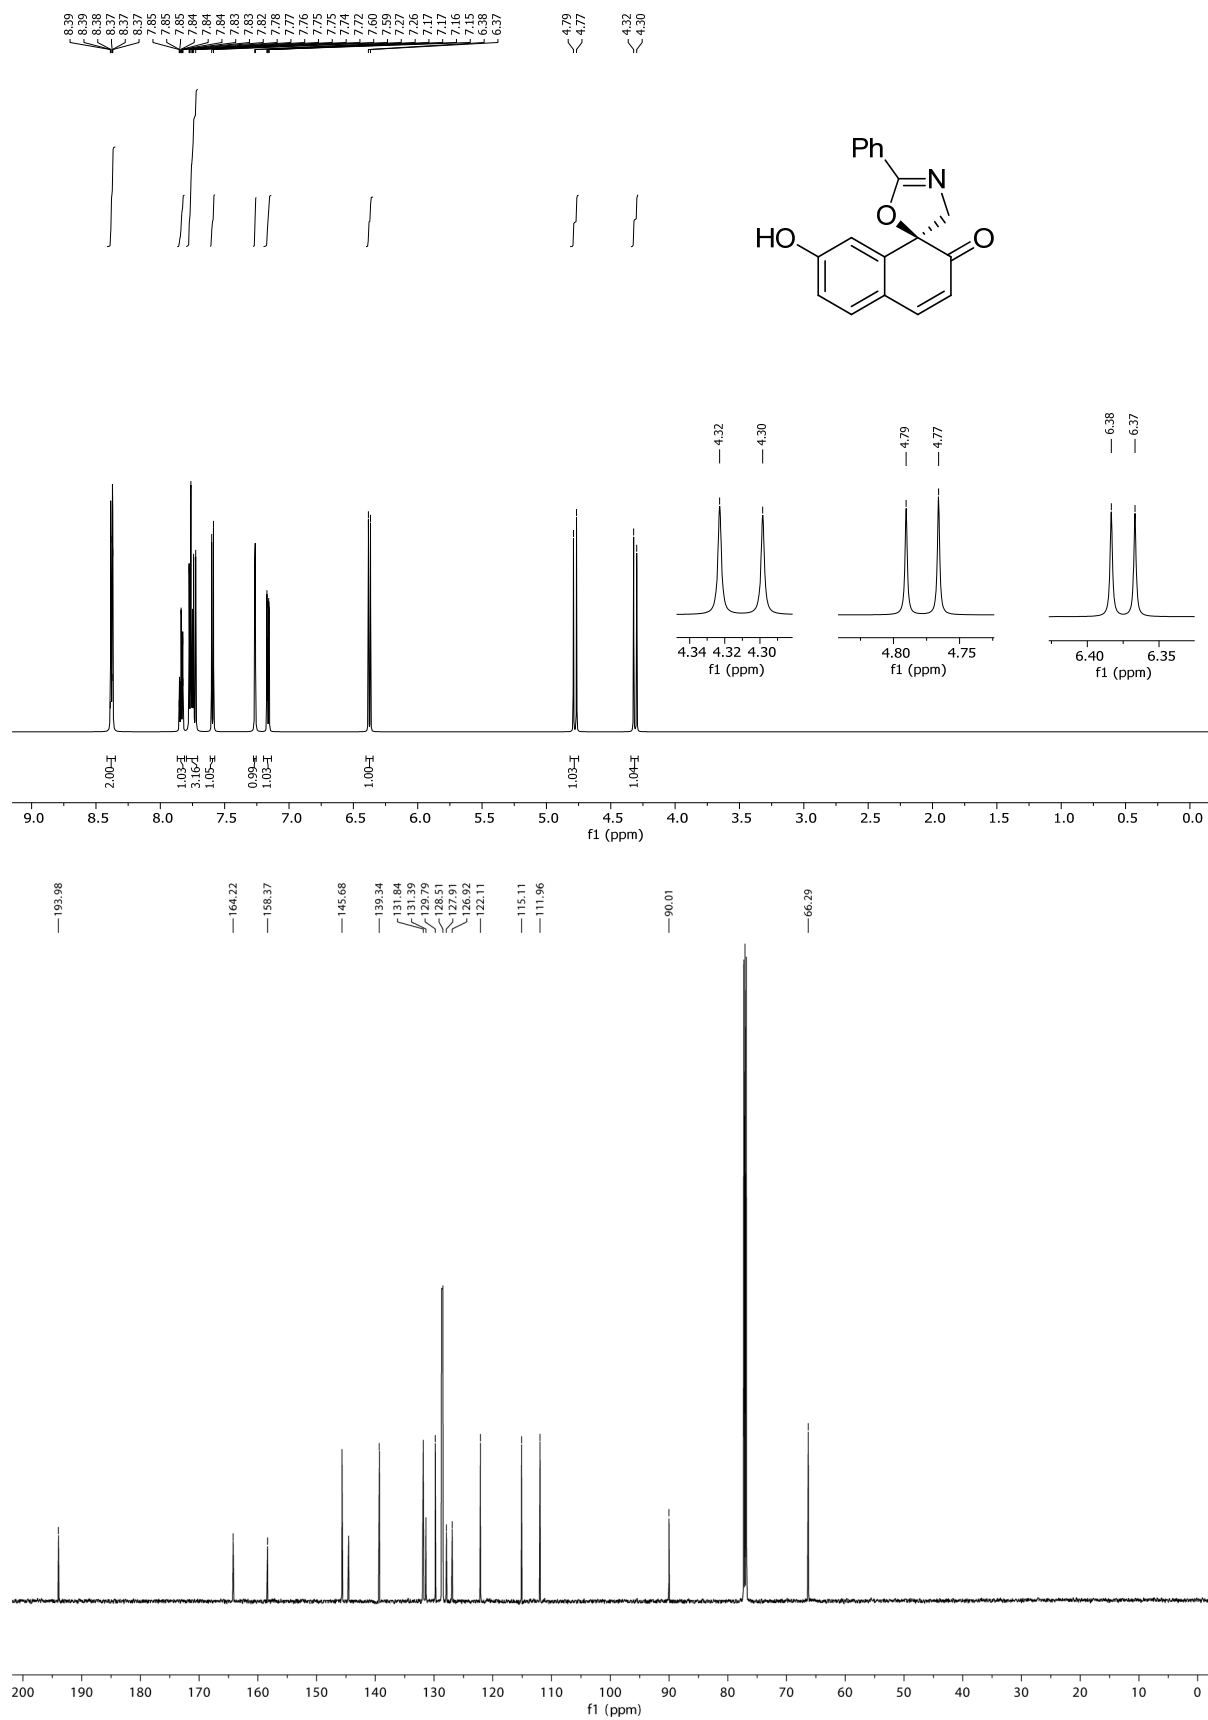

### 3.36. NMR of (S)-methyl 2-oxo-2'-phenyl-2*H*,4'*H*-spiro[naphthalene-1,5'-oxazole]-3-carboxylate (5e) in CDCl<sub>3</sub>

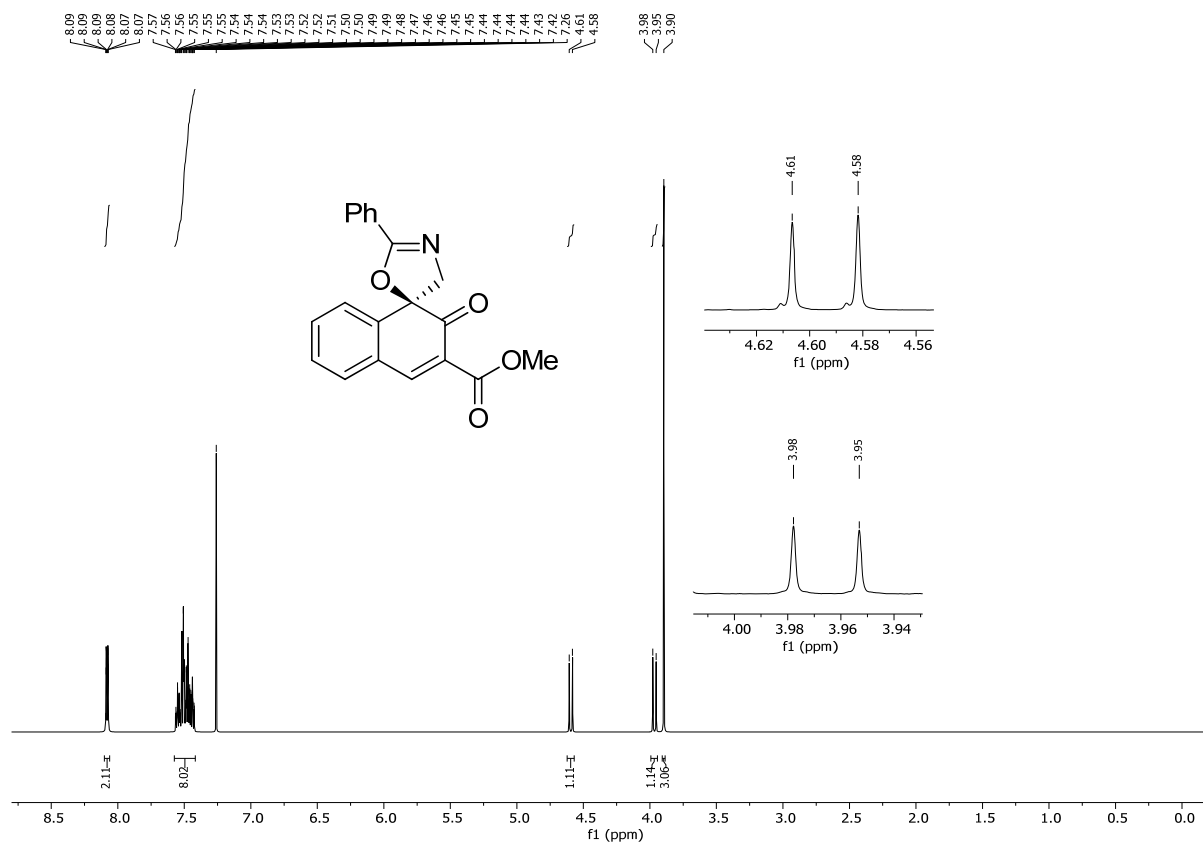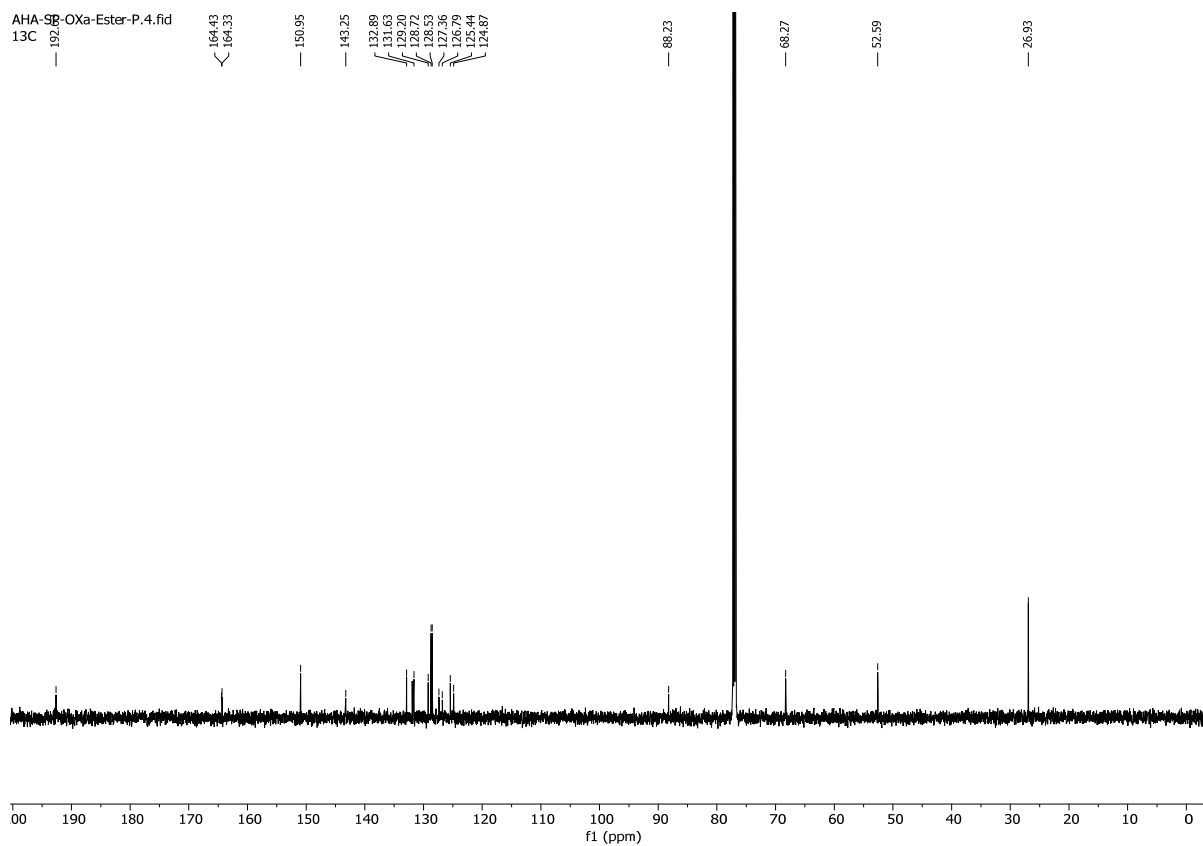

3.37. NMR of (S)-2'-phenyl-3-propionyl-2H,4'H-spiro[naphthalene-1,5'-oxazol]-2-one (5f) in CDCl<sub>3</sub>

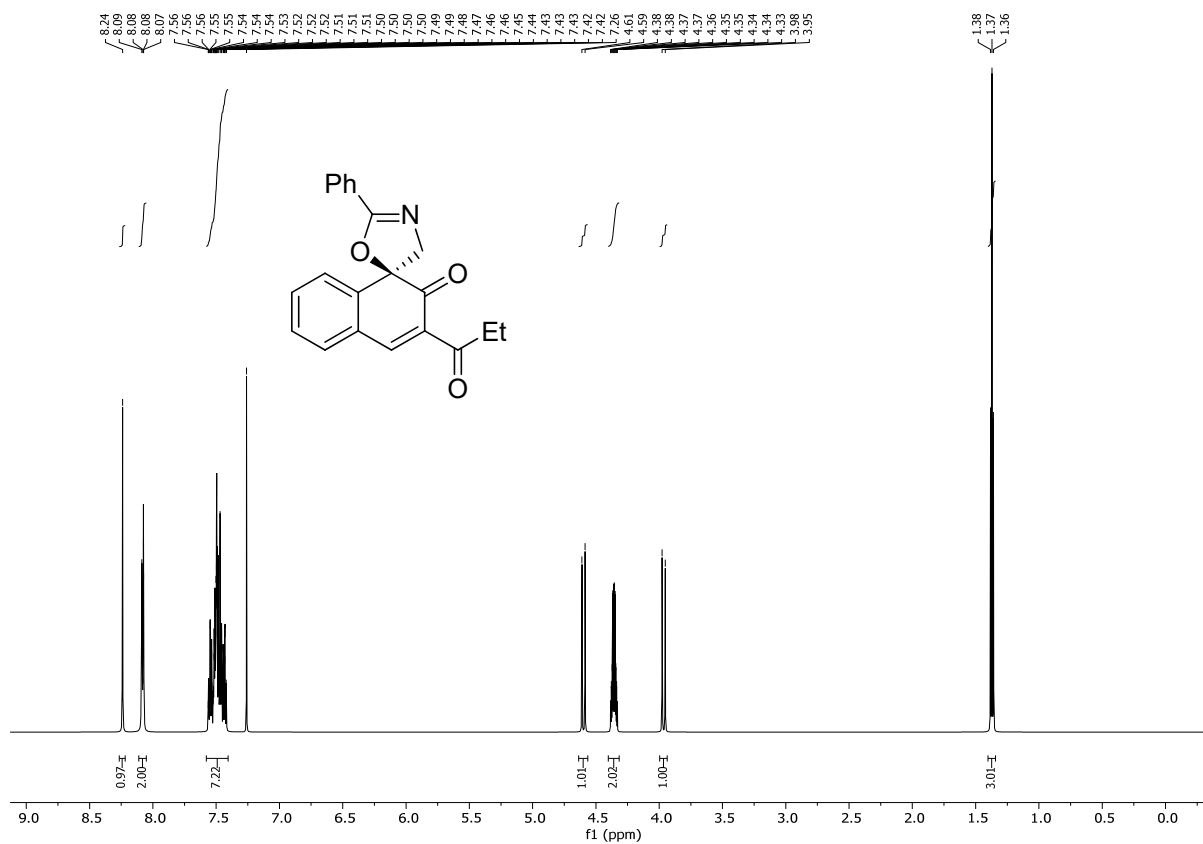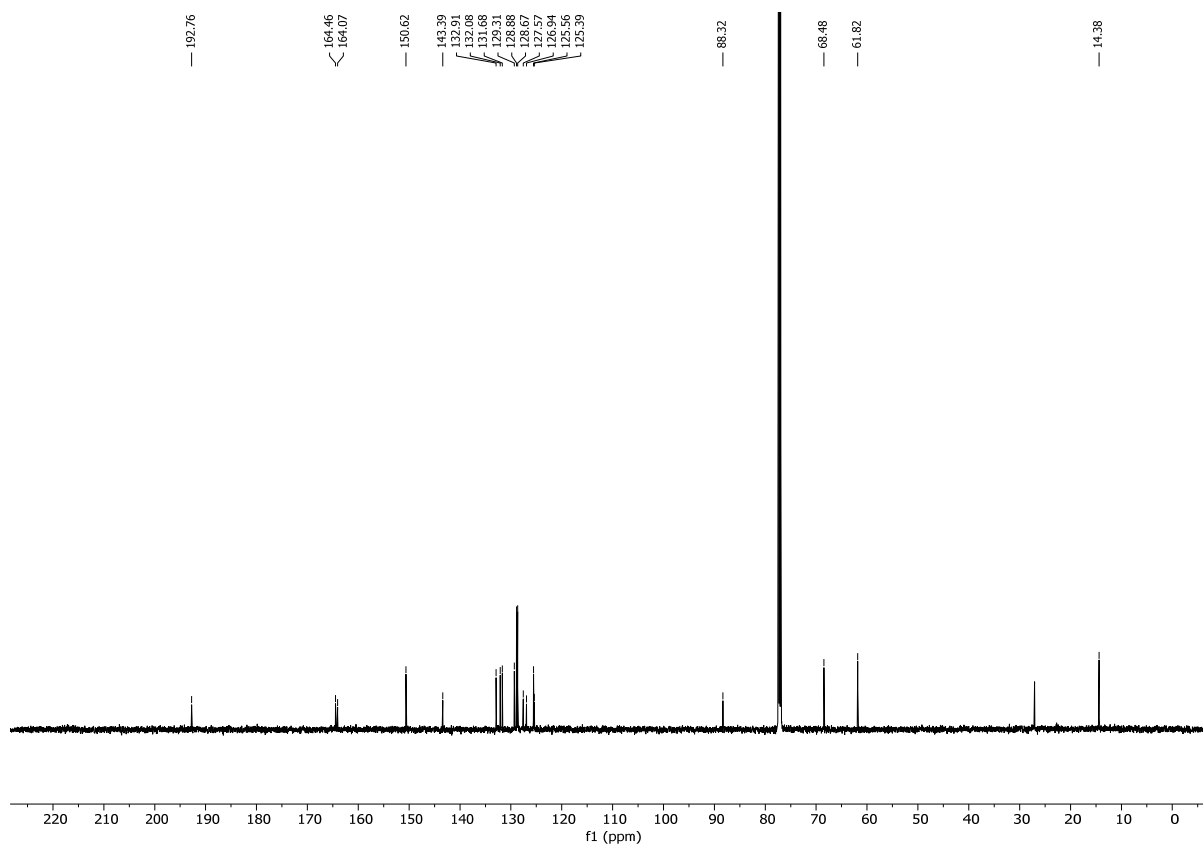

### 3.38. NMR of (1S)-2'-phenyl-4a,5,6,7,8,8a-hexahydro-2H,4'H-spiro [naphthalene-1,5'-oxazol]-2-one (5g) in CDCl<sub>3</sub>

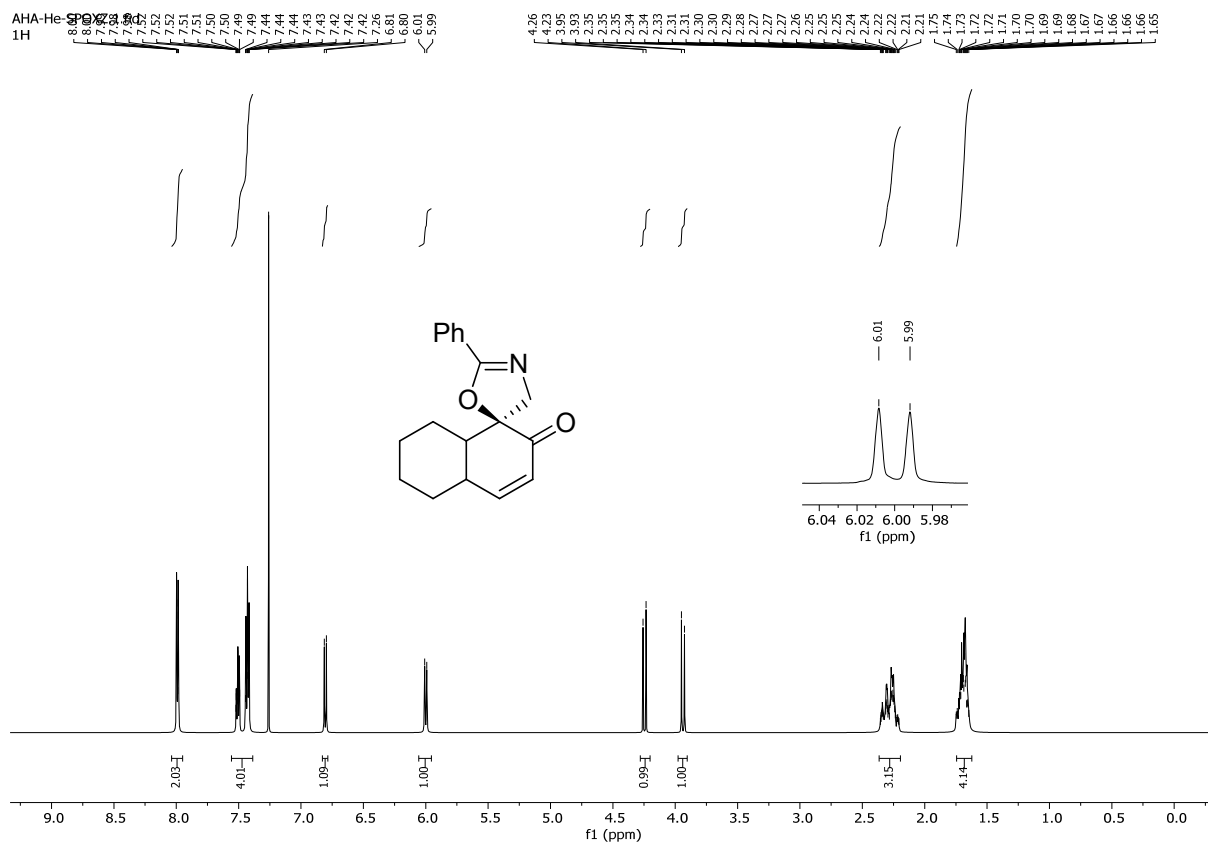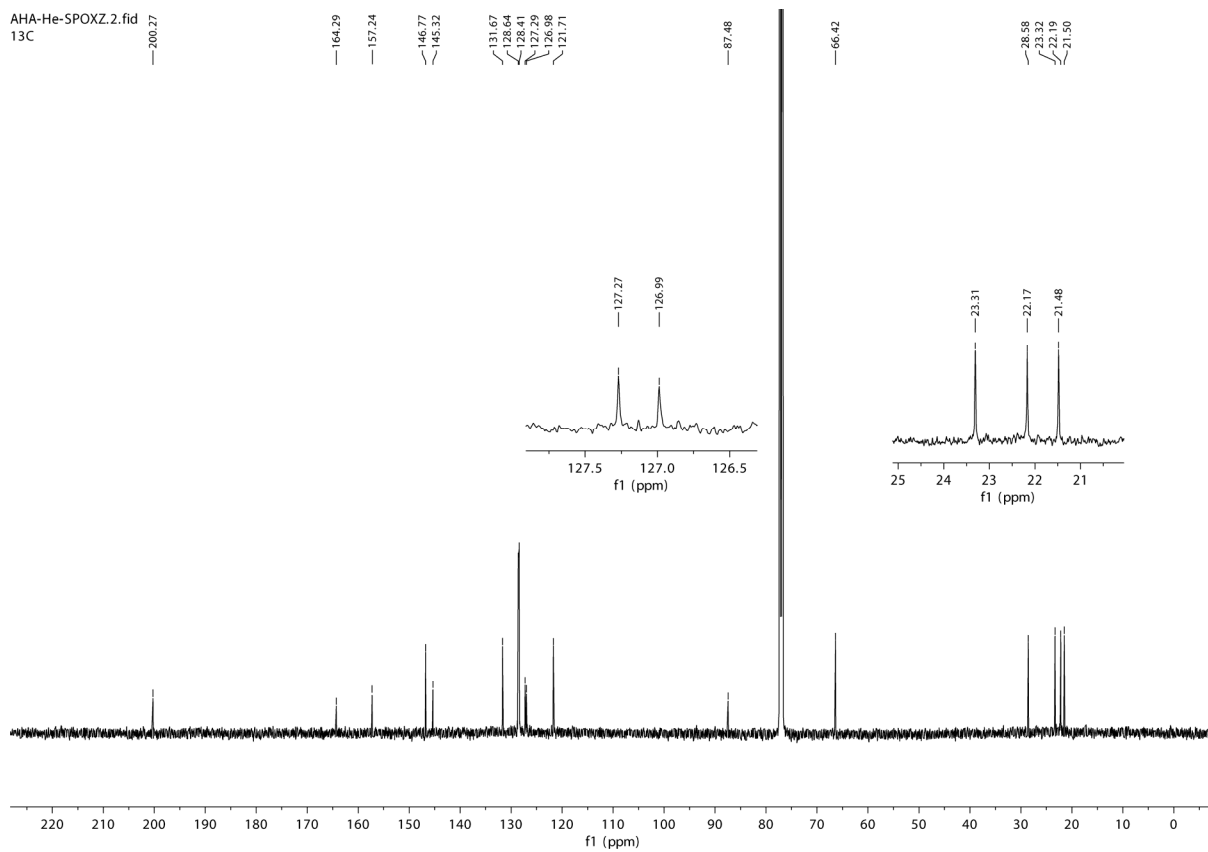

**3.39. NMR of (S)-2'-(4-bromophenyl)-2H,4'H-spiro[naphthalene-1,5'-oxazol]-2-one (5h) in CDCl<sub>3</sub>**

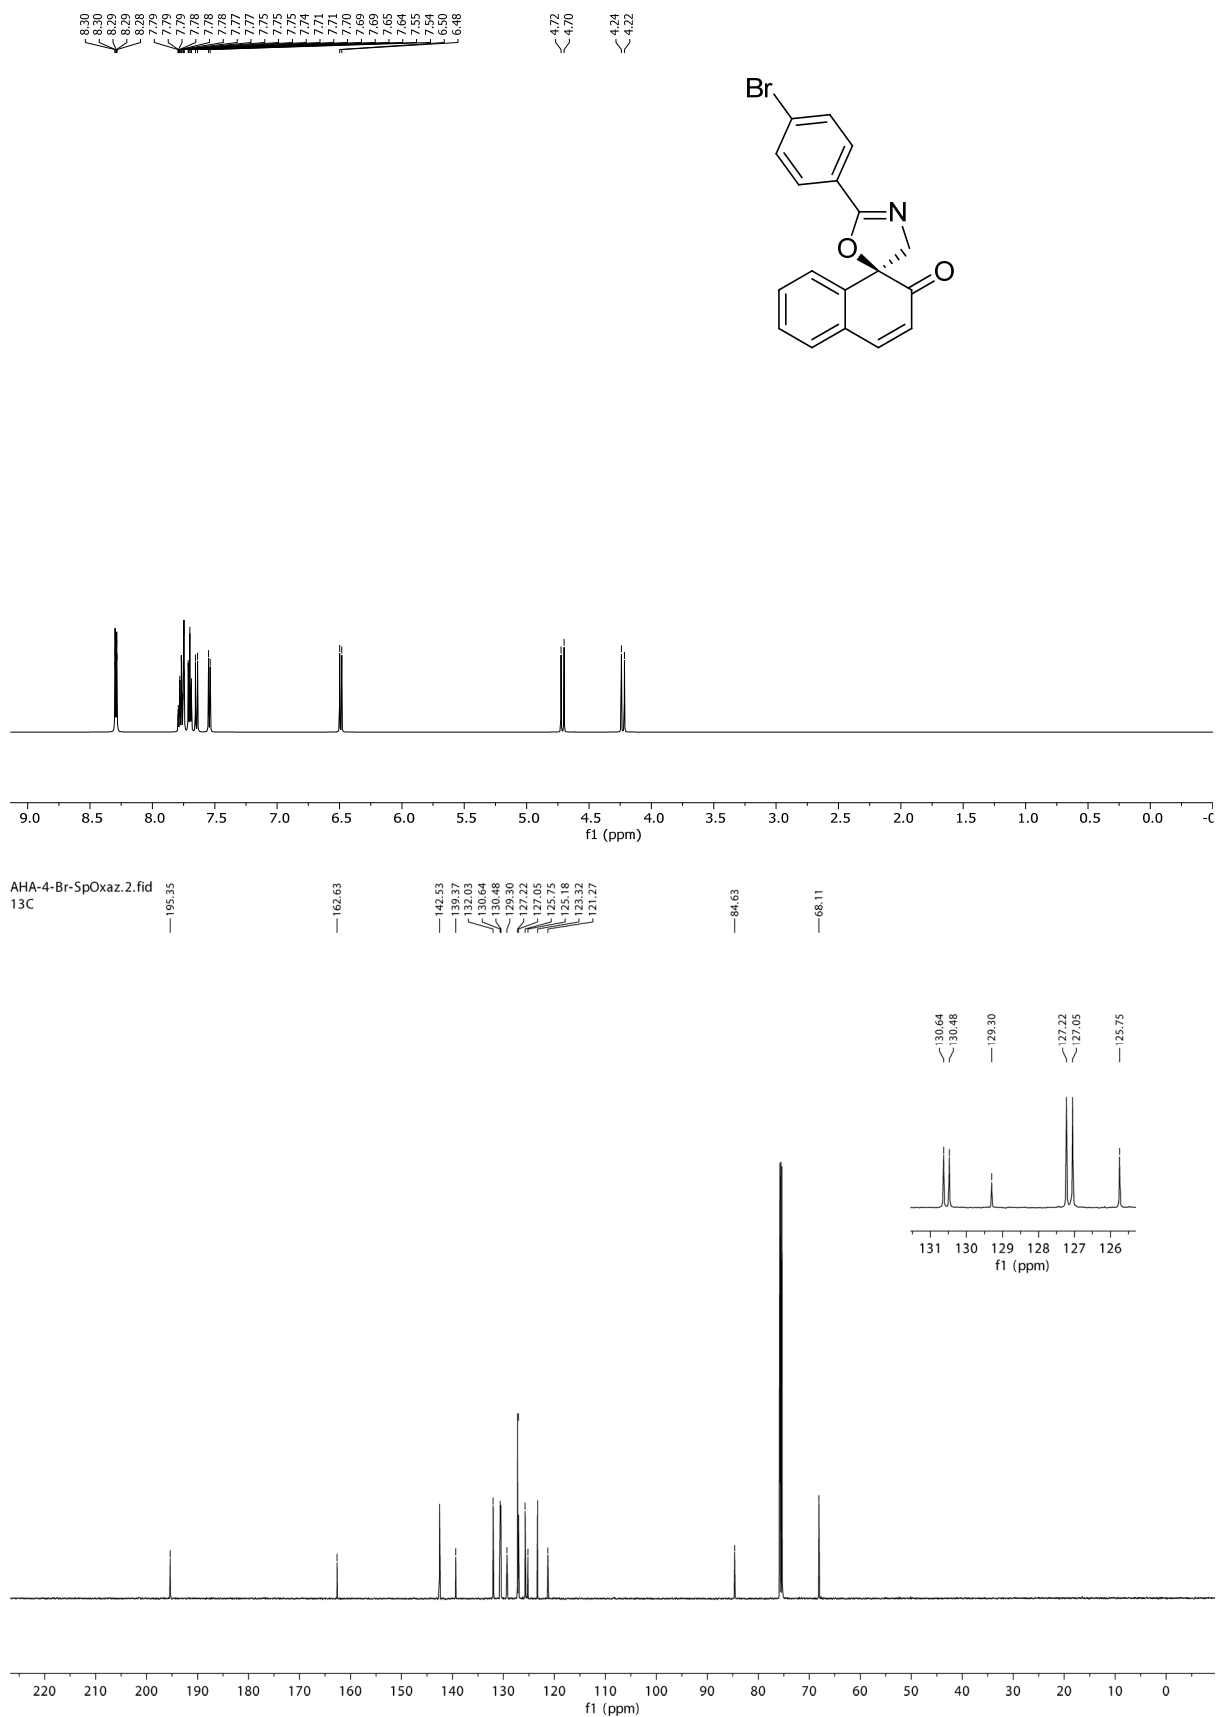

**3.40. NMR of (S)-2'-(4-chlorophenyl)-2H,4'H-spiro[naphthalene-1,5'-oxazol]-2-one (5i) in CDCl<sub>3</sub>**

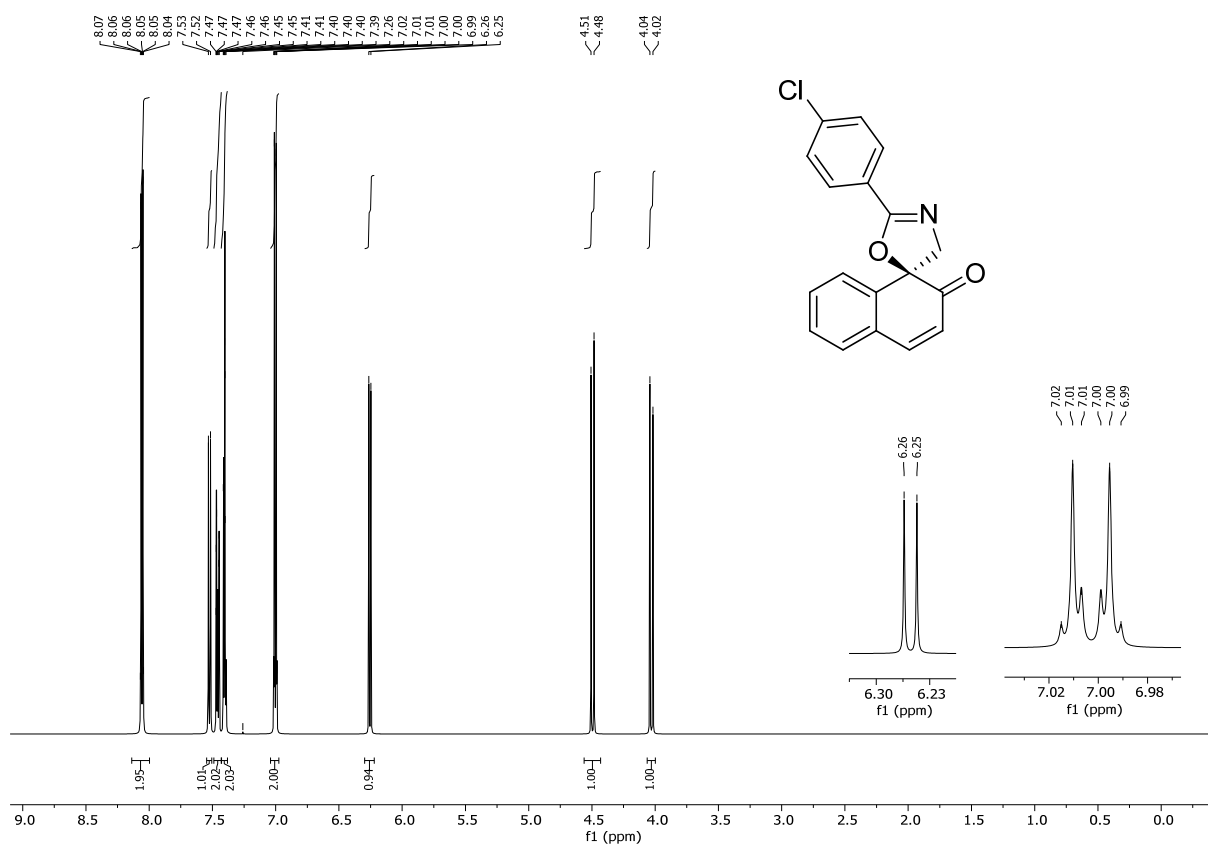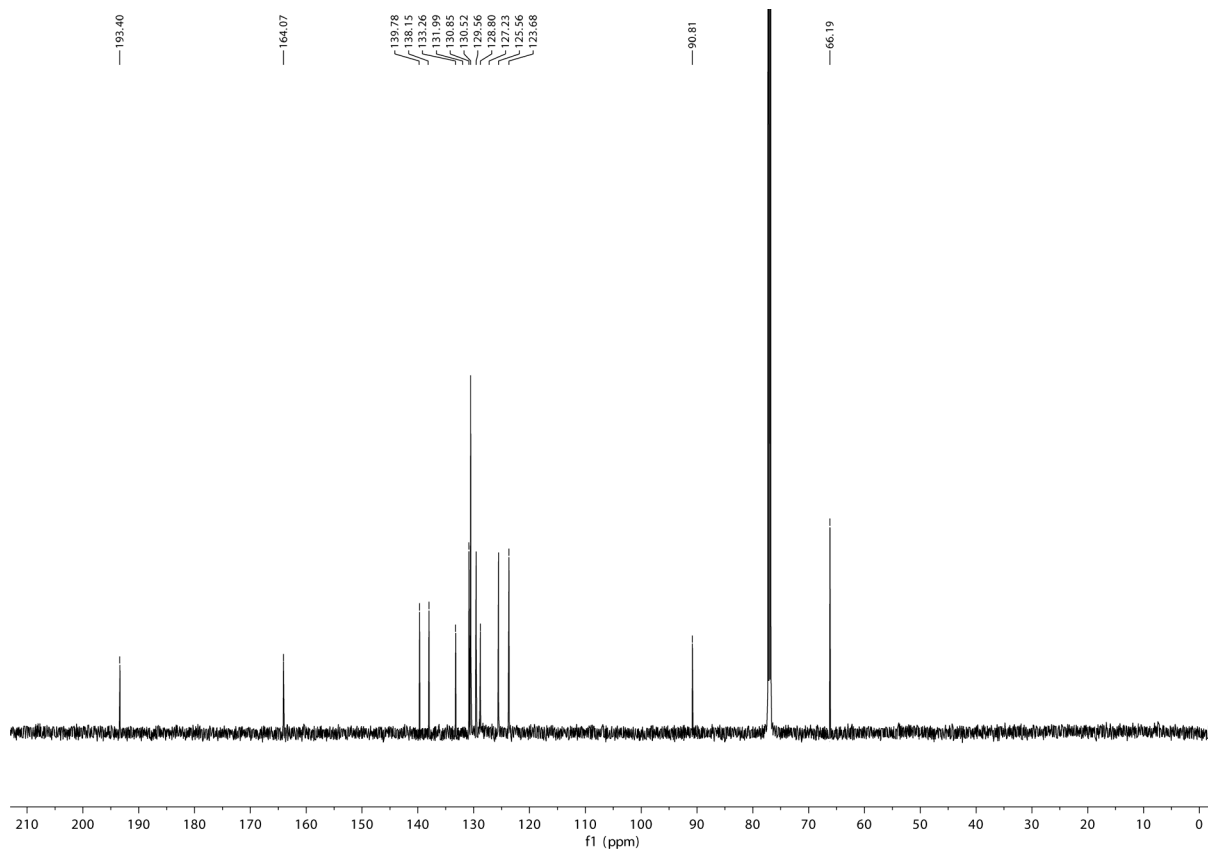

**3.41. NMR of (S)-2'-(4-fluorophenyl)-2H,4'H-spiro[naphthalene-1,5'-oxazol]-2-one (5j) in CDCl<sub>3</sub>**

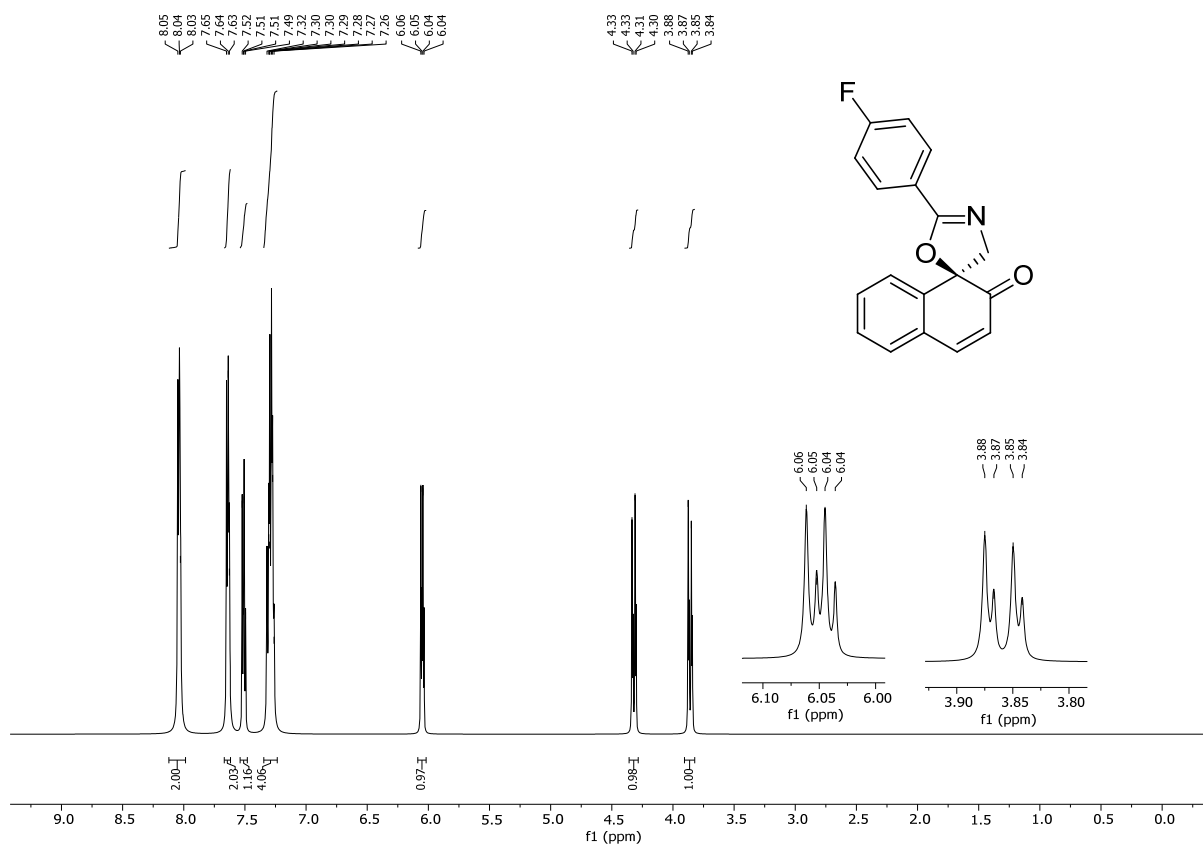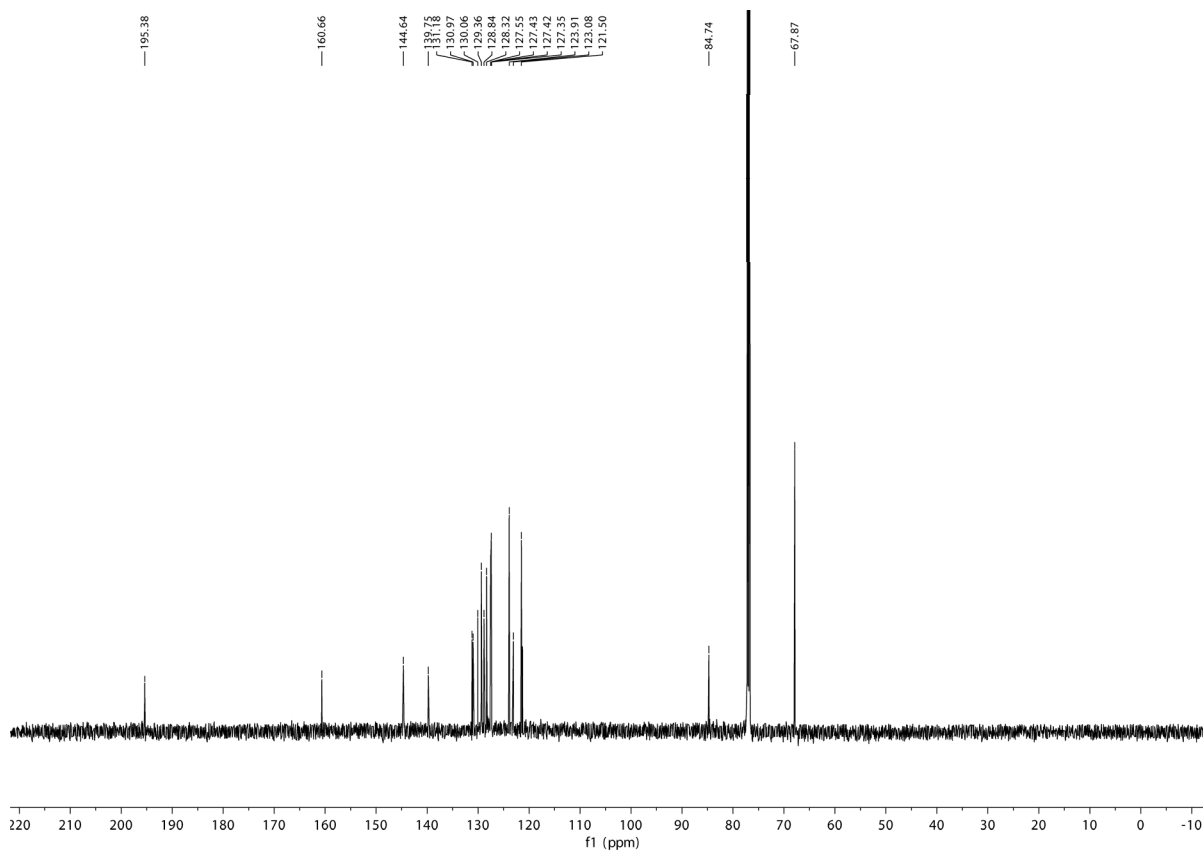



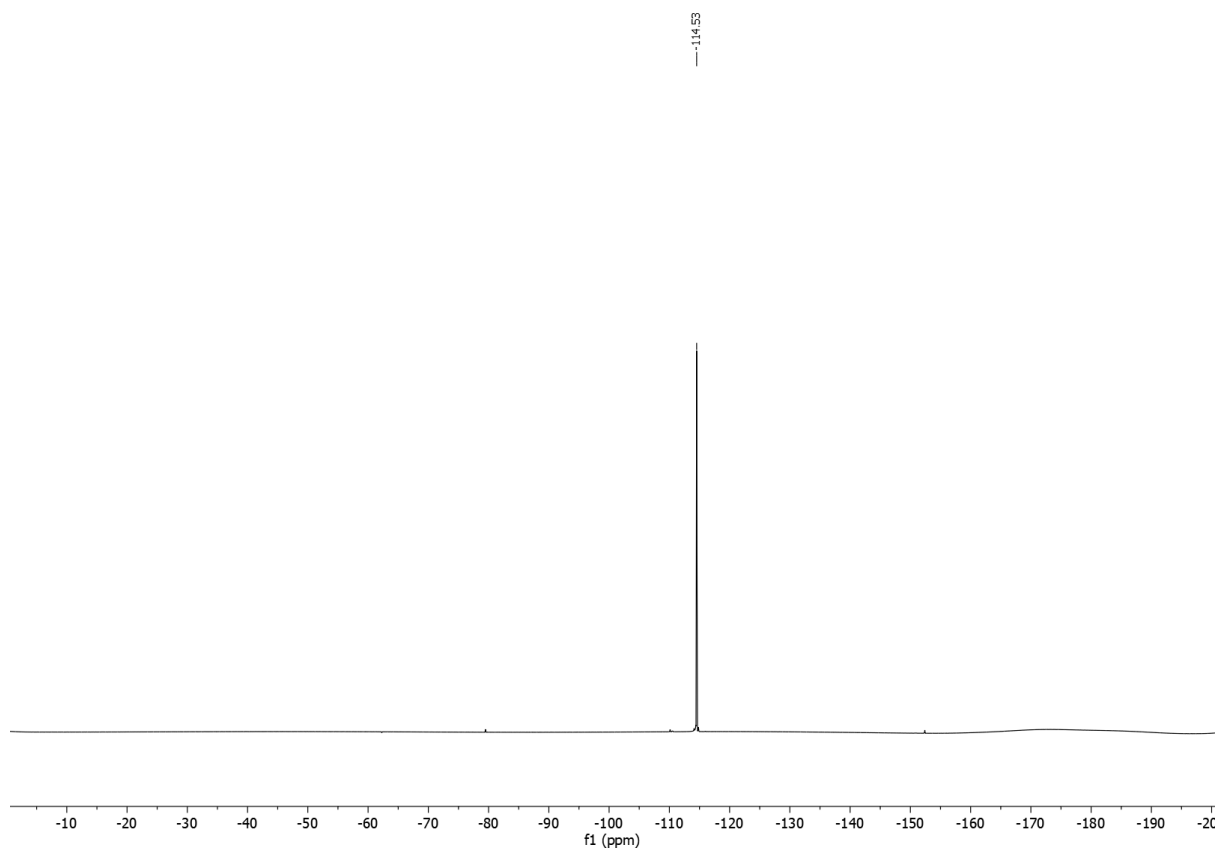

**3.42. NMR of (S)-2'-(2-bromophenyl)-2H,4'H-spiro[naphthalene-1,5'-oxazol]-2-one (5k) in CDCl<sub>3</sub>**

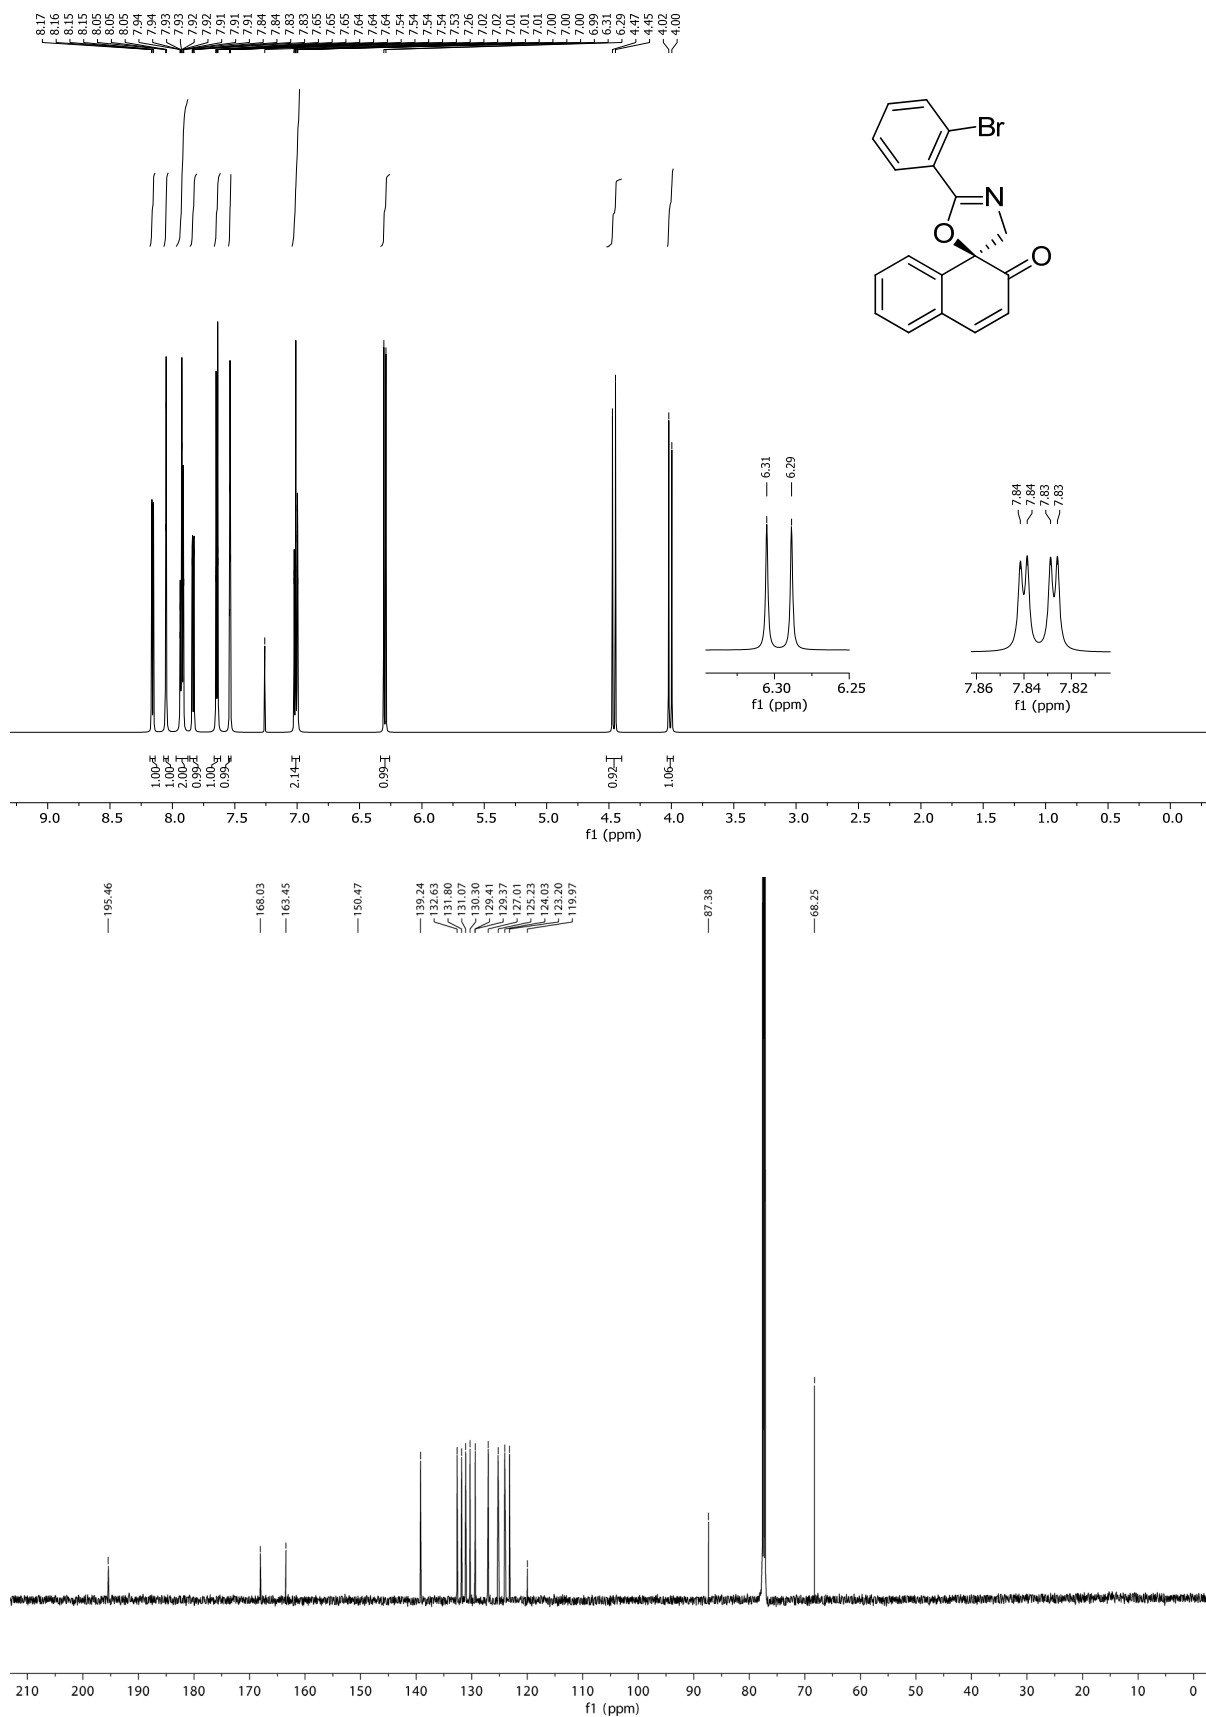

**3.43. NMR of (S)-2'-(3-bromophenyl)-2H,4'H-spiro[naphthalene-1,5'-oxazol]-2-one (5I) in CDCl<sub>3</sub>**

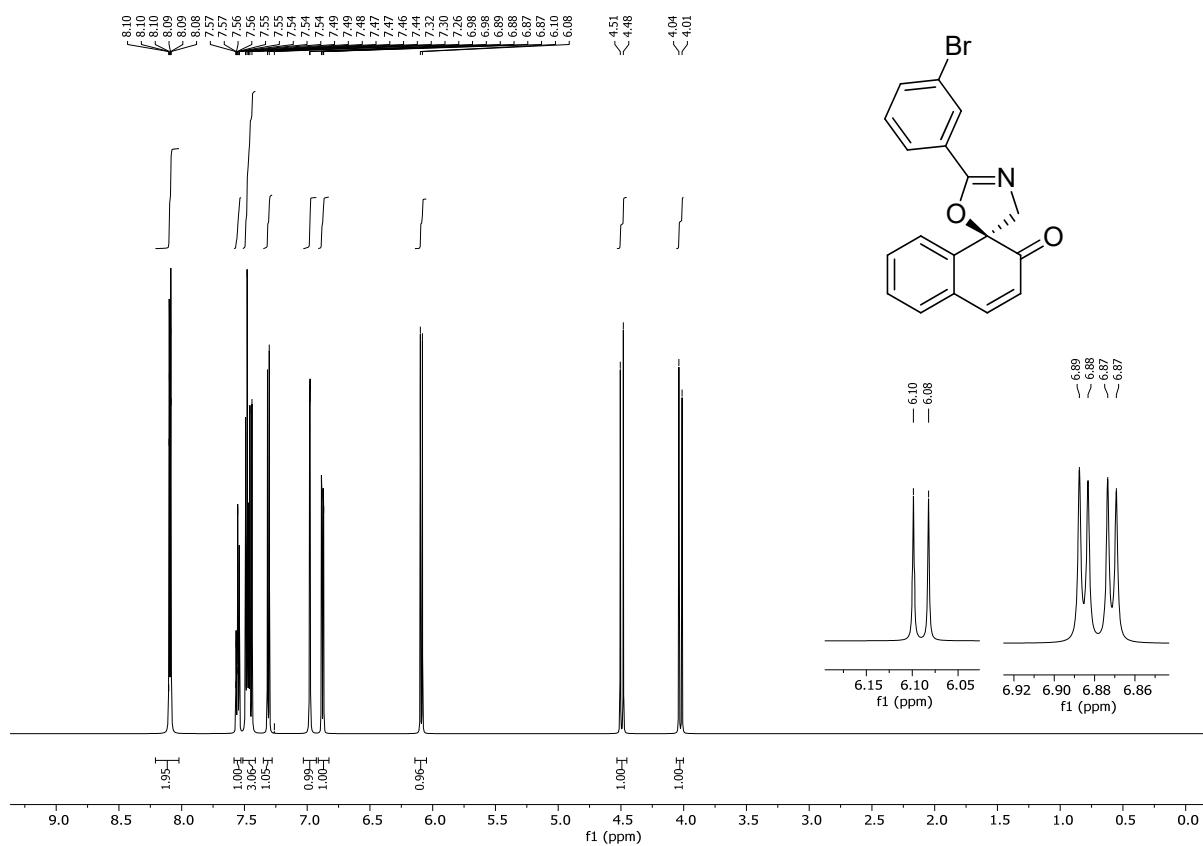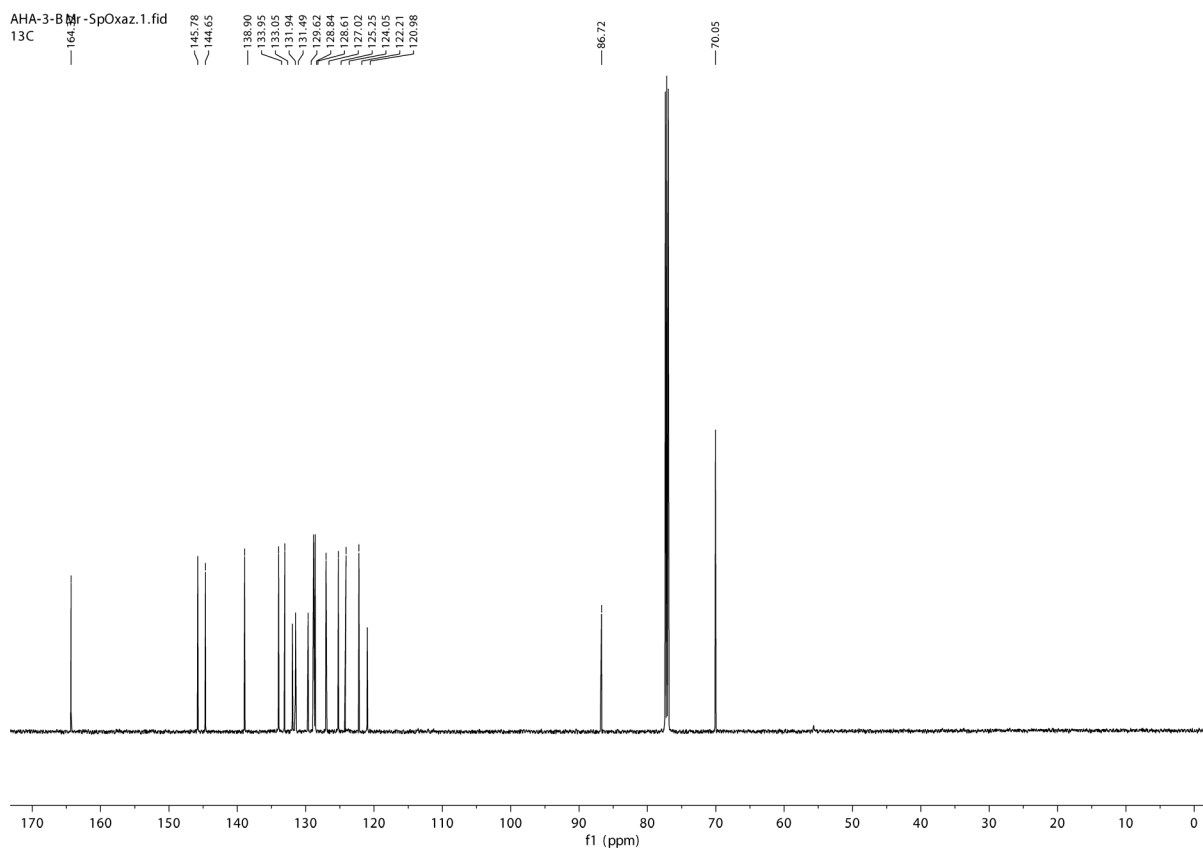

3.44. NMR of (S)-2'-(3,5-dibromophenyl)-2*H*,4'*H*-spiro[naphthalene-1,5'-oxazol]-2-one (5m) in CDCl<sub>3</sub>

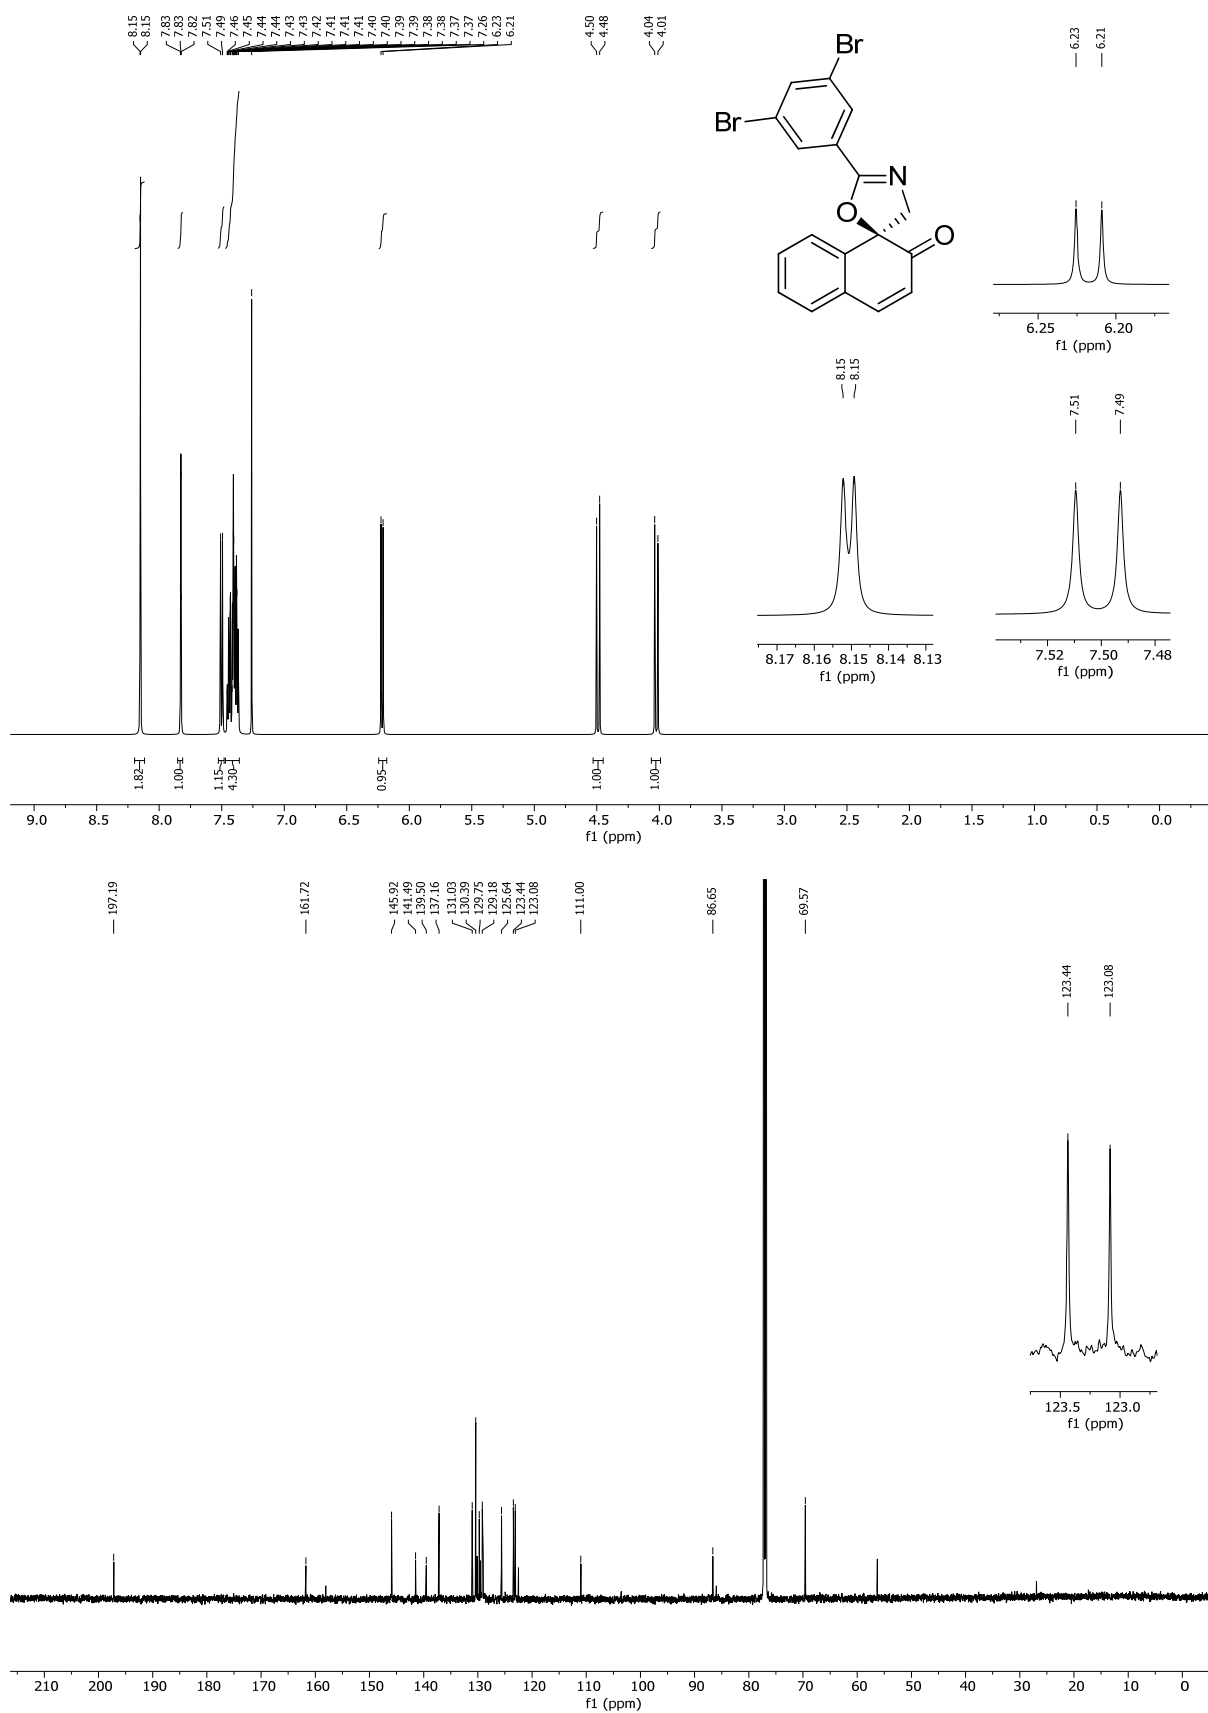

**3.45. NMR of (S)-2'-(4-(trifluoromethyl)phenyl)-2H,4'H-spiro[naphthalene - 1,5'-oxazol]-2-one (5n) in CDCl<sub>3</sub>**

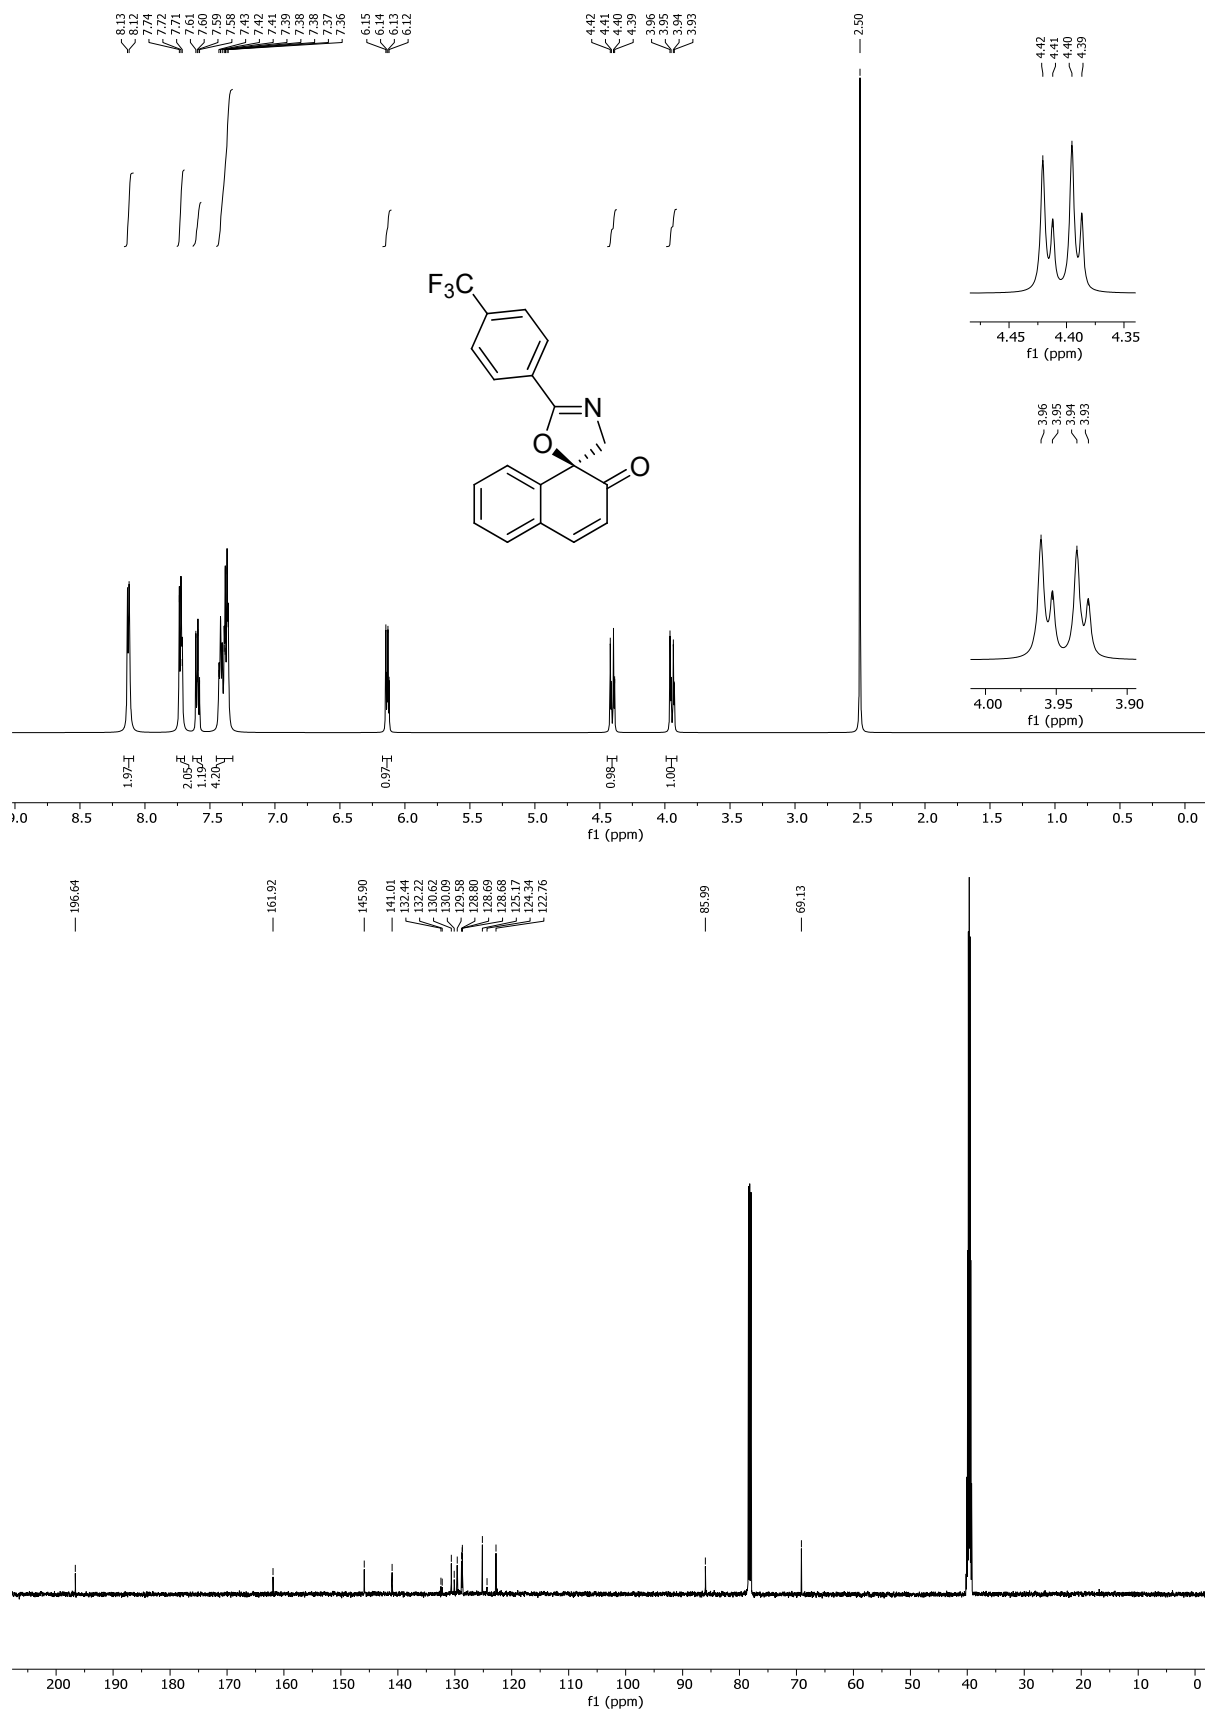

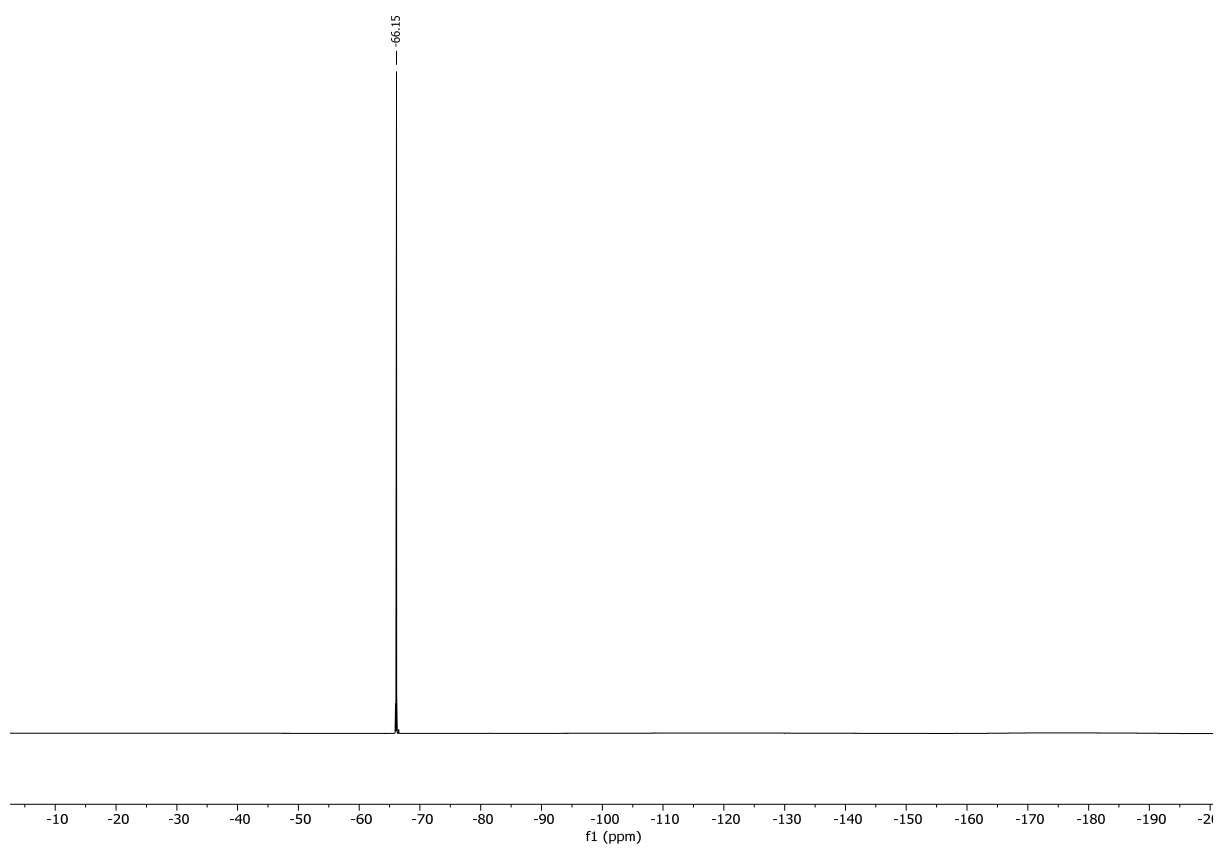

**3.46. NMR of (S)-2'-(4-nitrophenyl)-2H,4'H-spiro[naphthalene-1,5'-oxazol]-2-one (5o) in CDCl<sub>3</sub>**

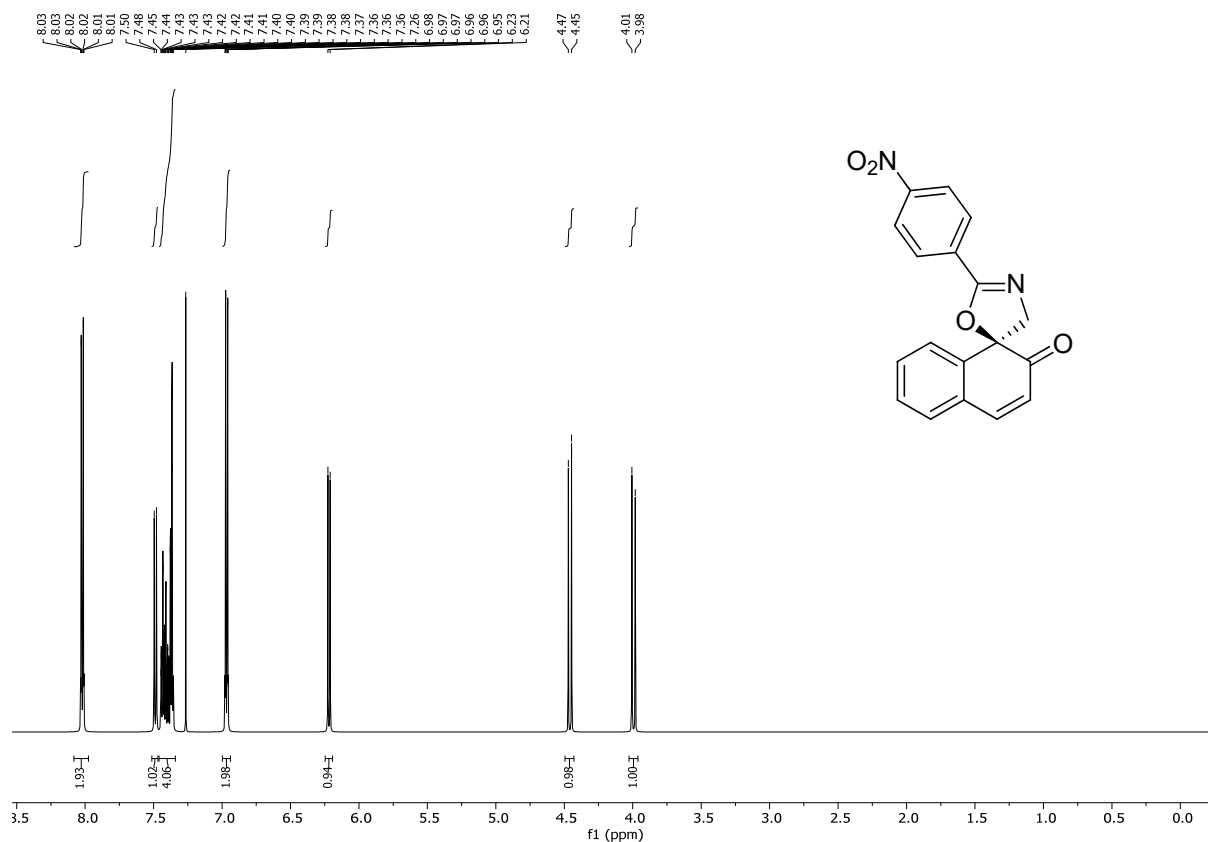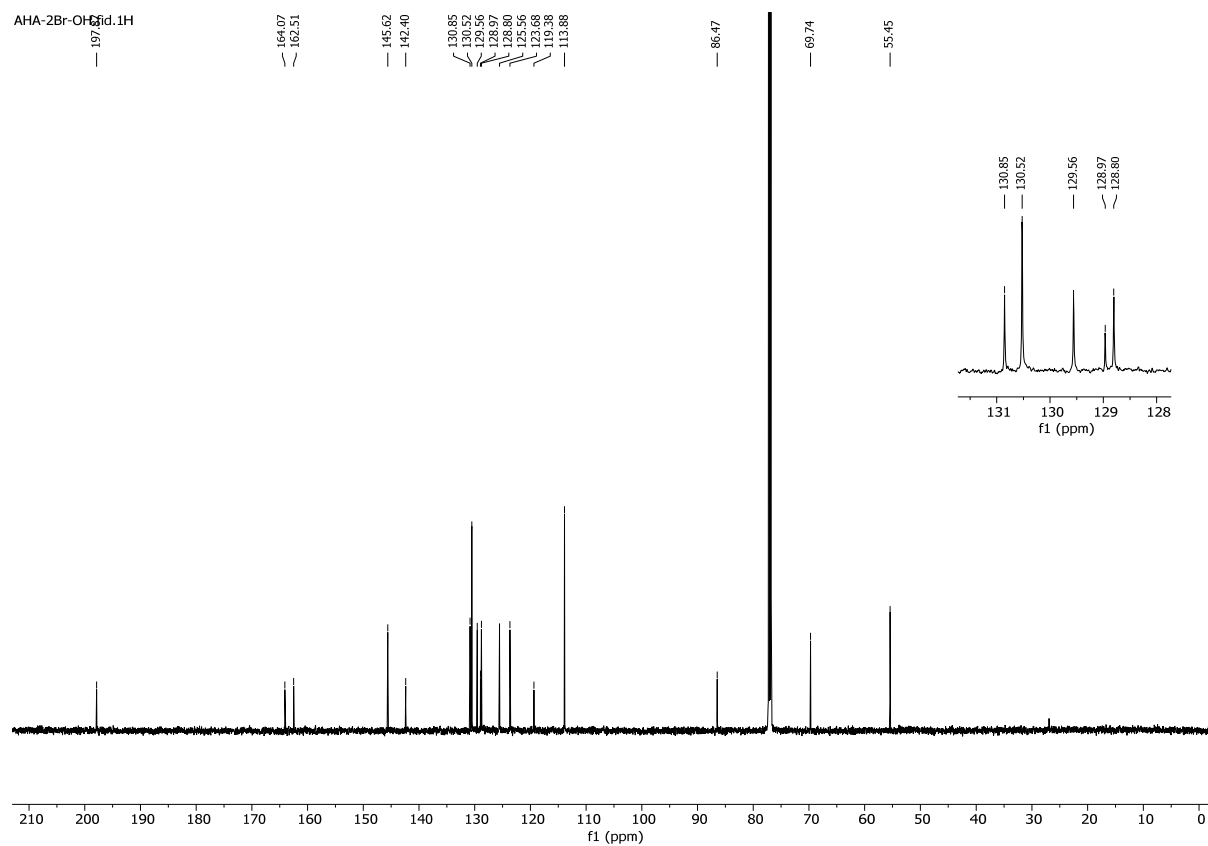

3.47. NMR of (S)-2'-(4-methoxyphenyl)-2*H*,4'*H*-spiro[naphthalene-1,5'-oxazol]-2-one (5p) in CDCl<sub>3</sub>

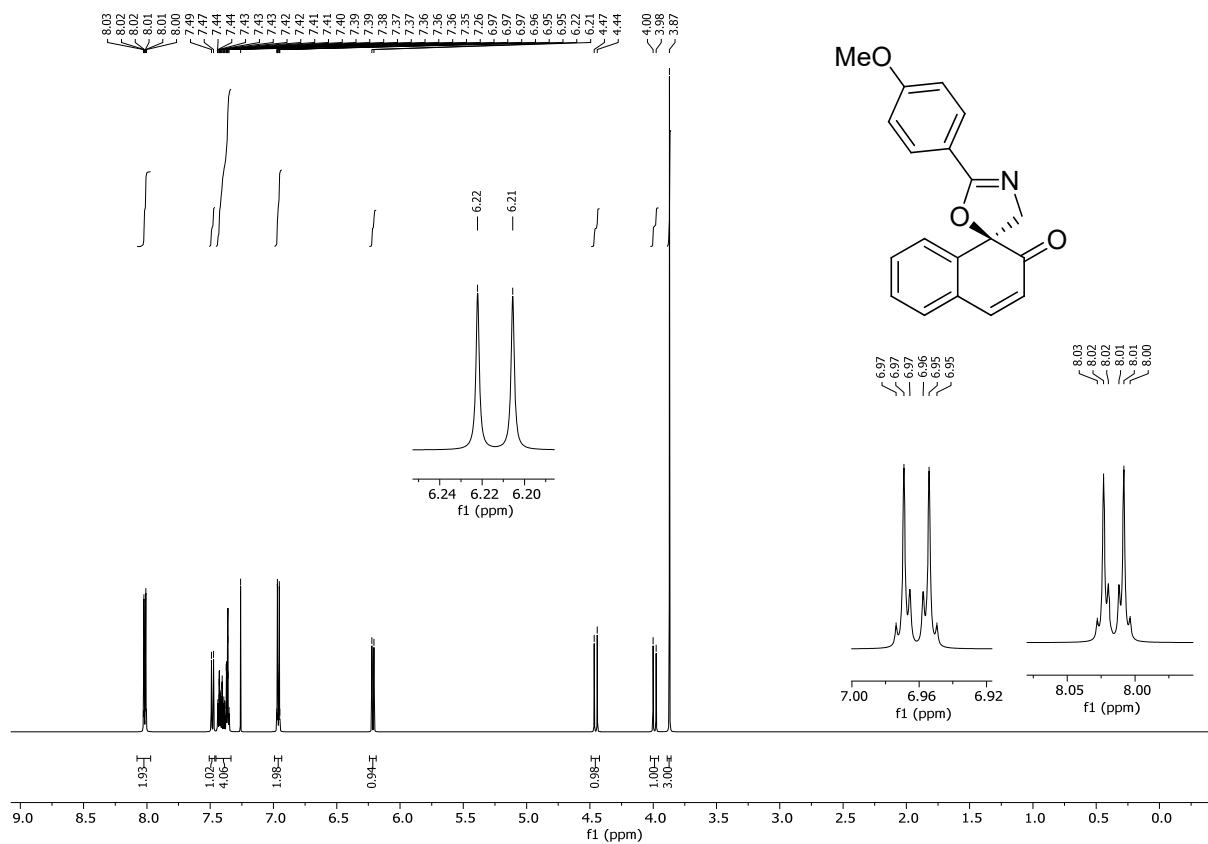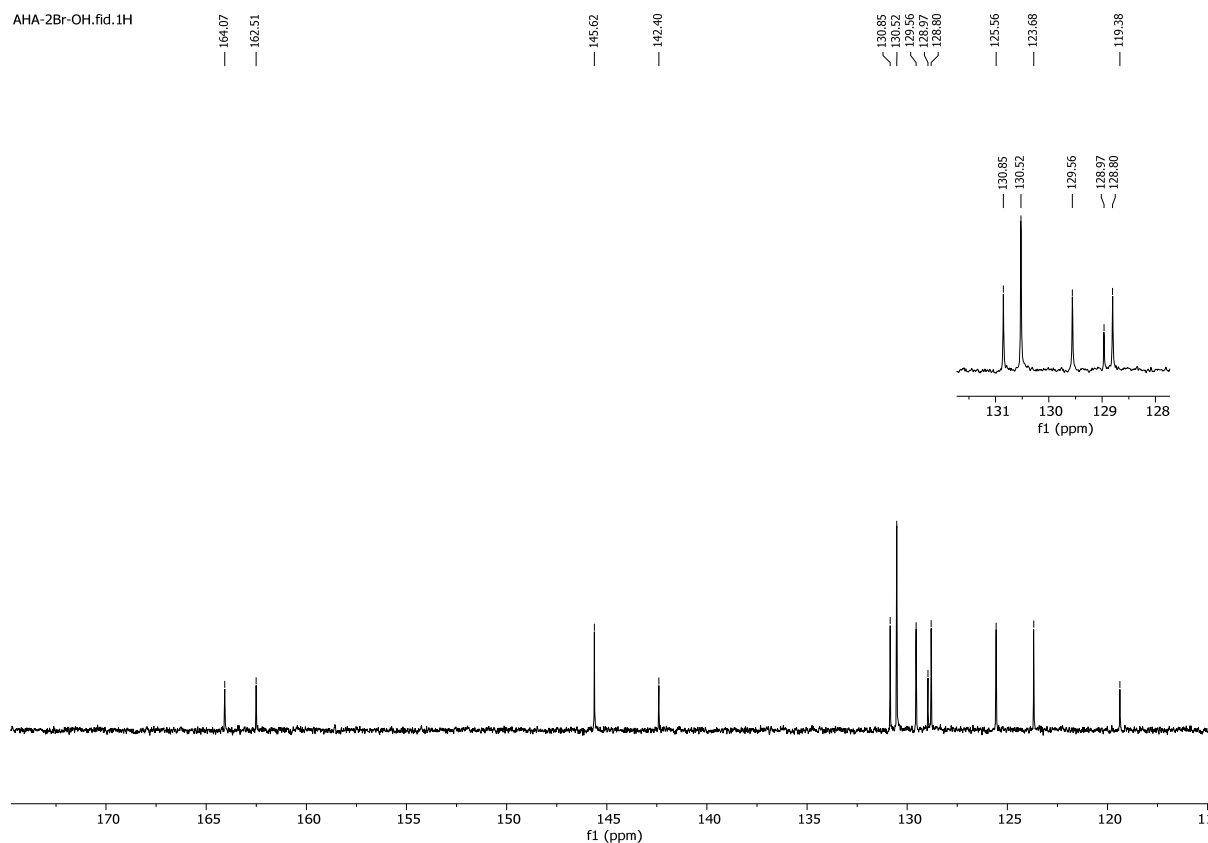



3.48. NMR of (*S*)-2'-(2-ethoxyphenyl)-2*H*,4'*H*-spiro[naphthalene-1,5'-oxazol]-2-one (5q) in CDCl<sub>3</sub>

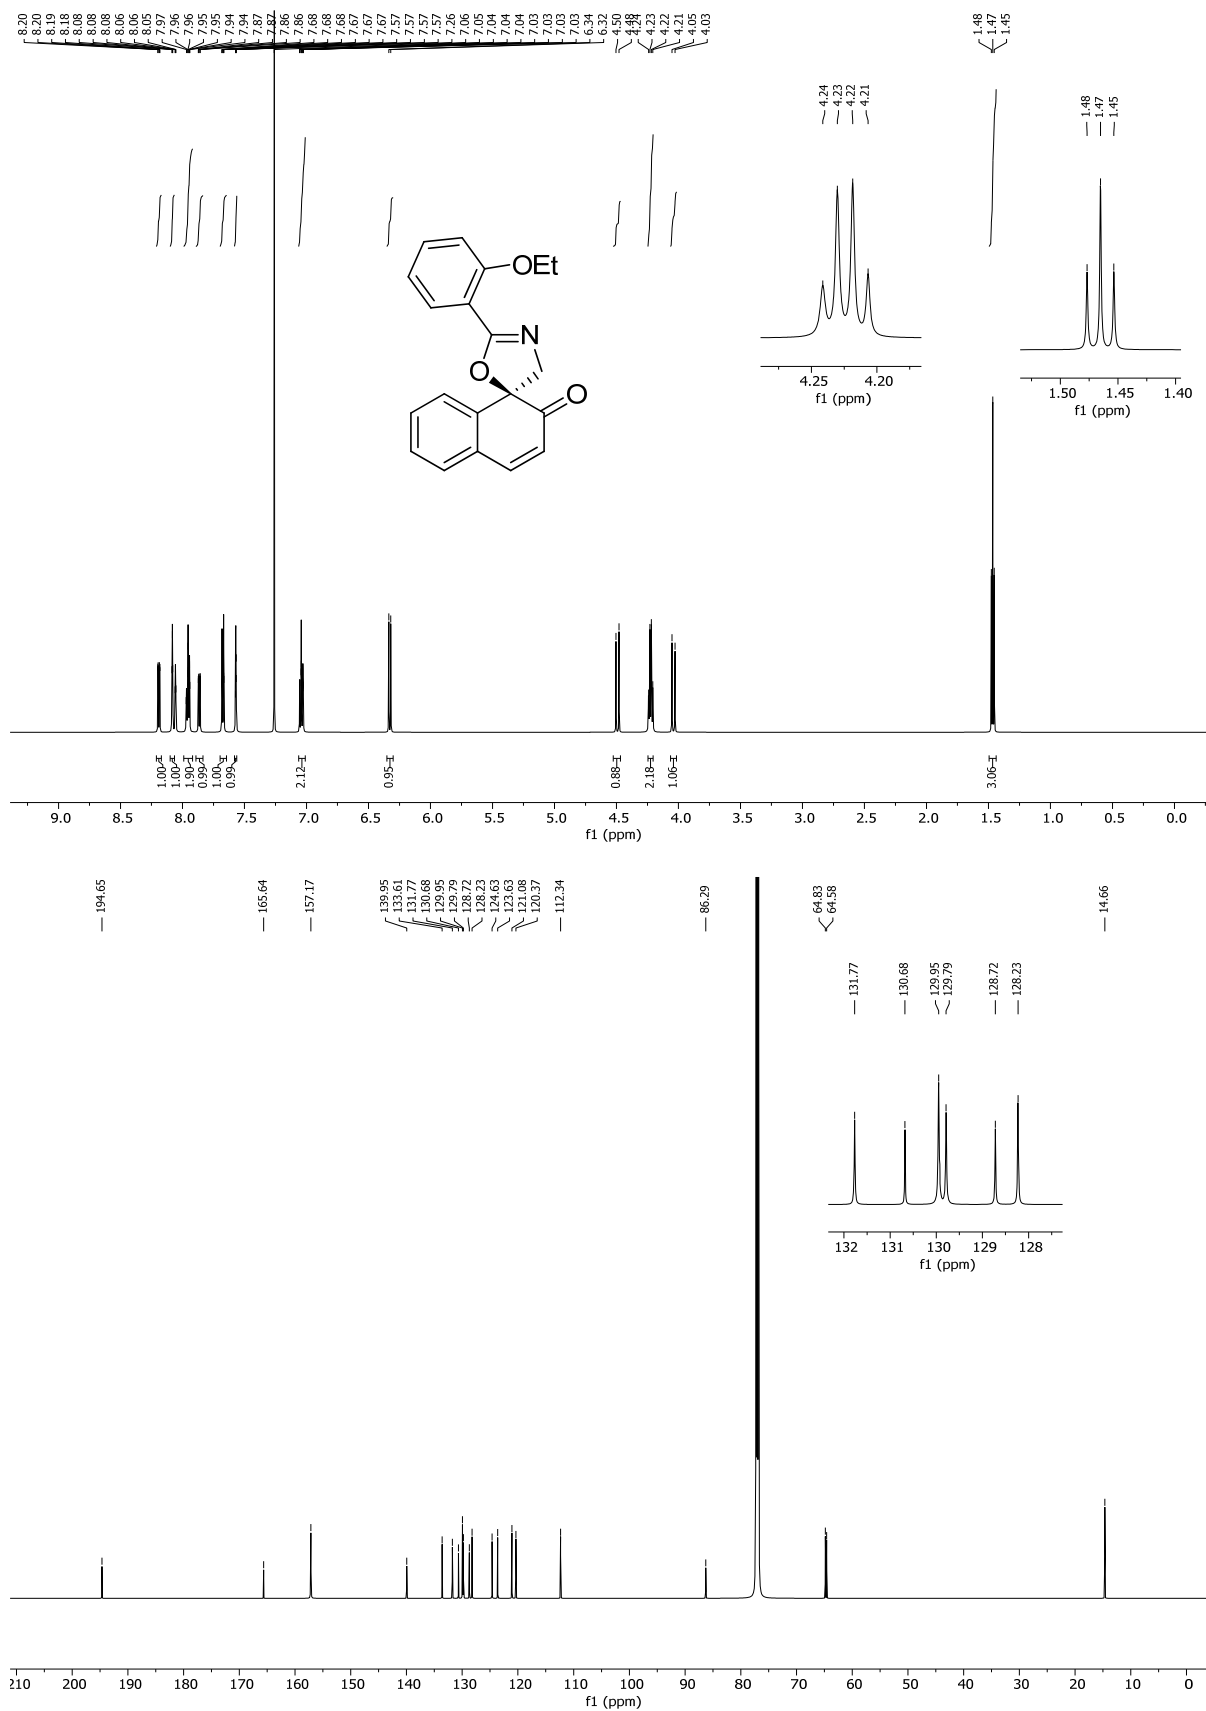

**3.49. NMR of (S)-2'-(3,4,5-trimethoxyphenyl)-2*H*,4'*H*-spiro[naphthalene-1,5'-oxazol]-2-one (5r) in CDCl<sub>3</sub>**

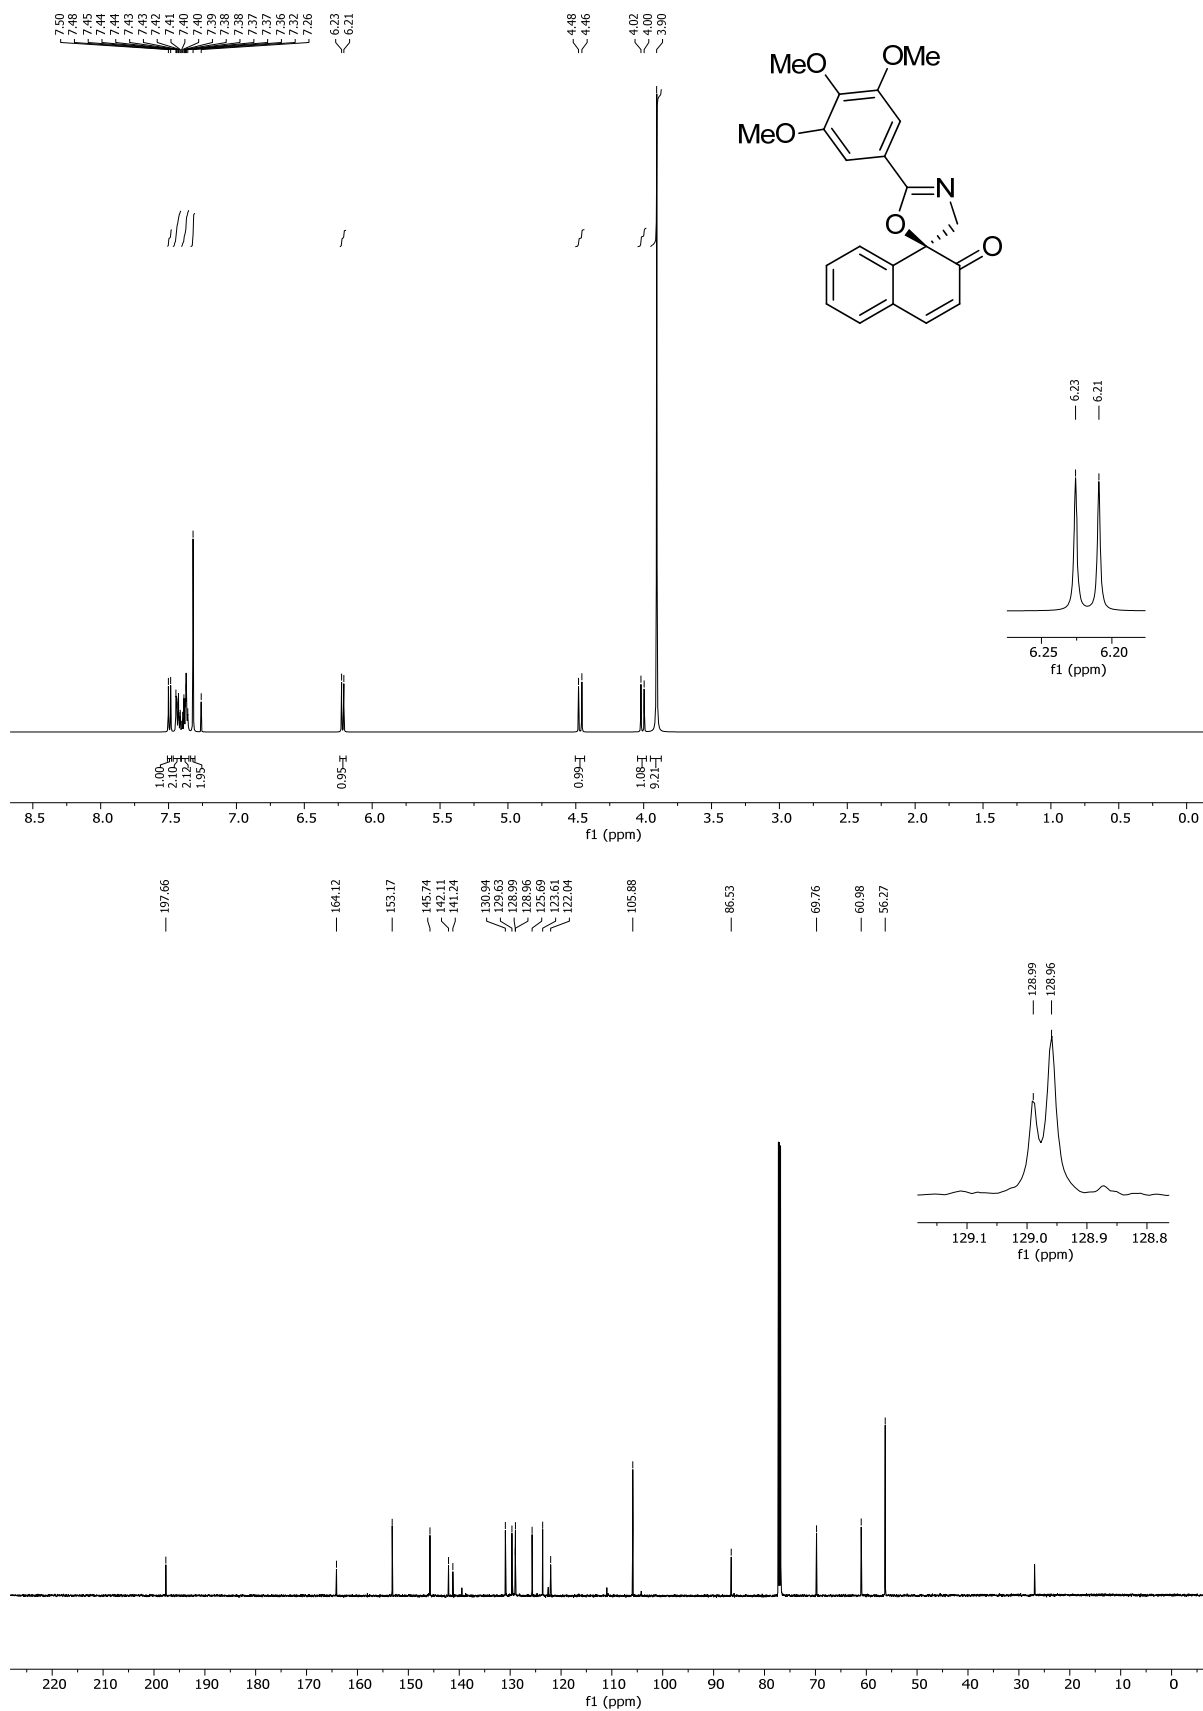

**3.50. NMR of (S)-2'-(pyridin-2-yl)-2H,4'H-spiro[naphthalene-1,5'-oxazol]-2-one (5s) in CDCl<sub>3</sub>**

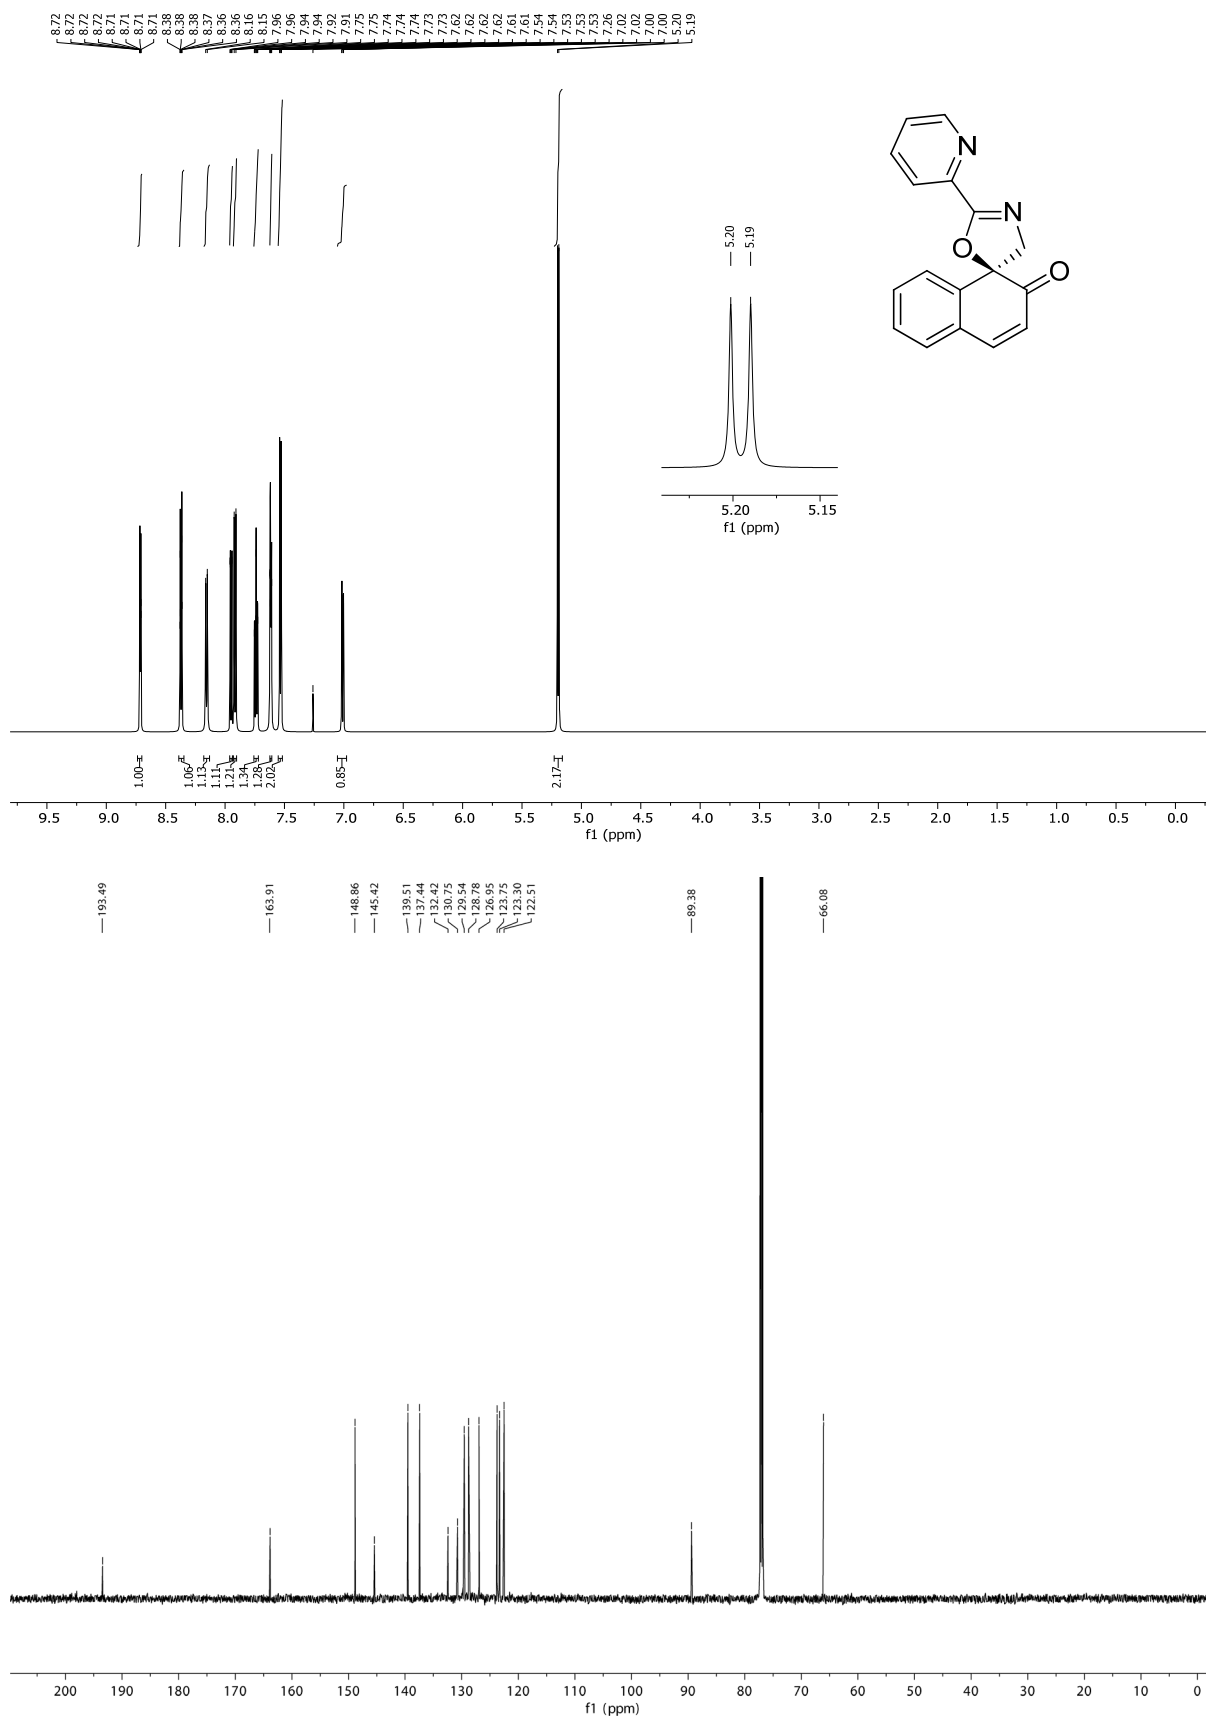

**3.51. NMR of (1*S*,2*R*)-2'-phenyl-2*H*,4'*H*-spiro[naphthalene-1,5'-oxazol]-2-ol (7)  
in CDCl<sub>3</sub>**

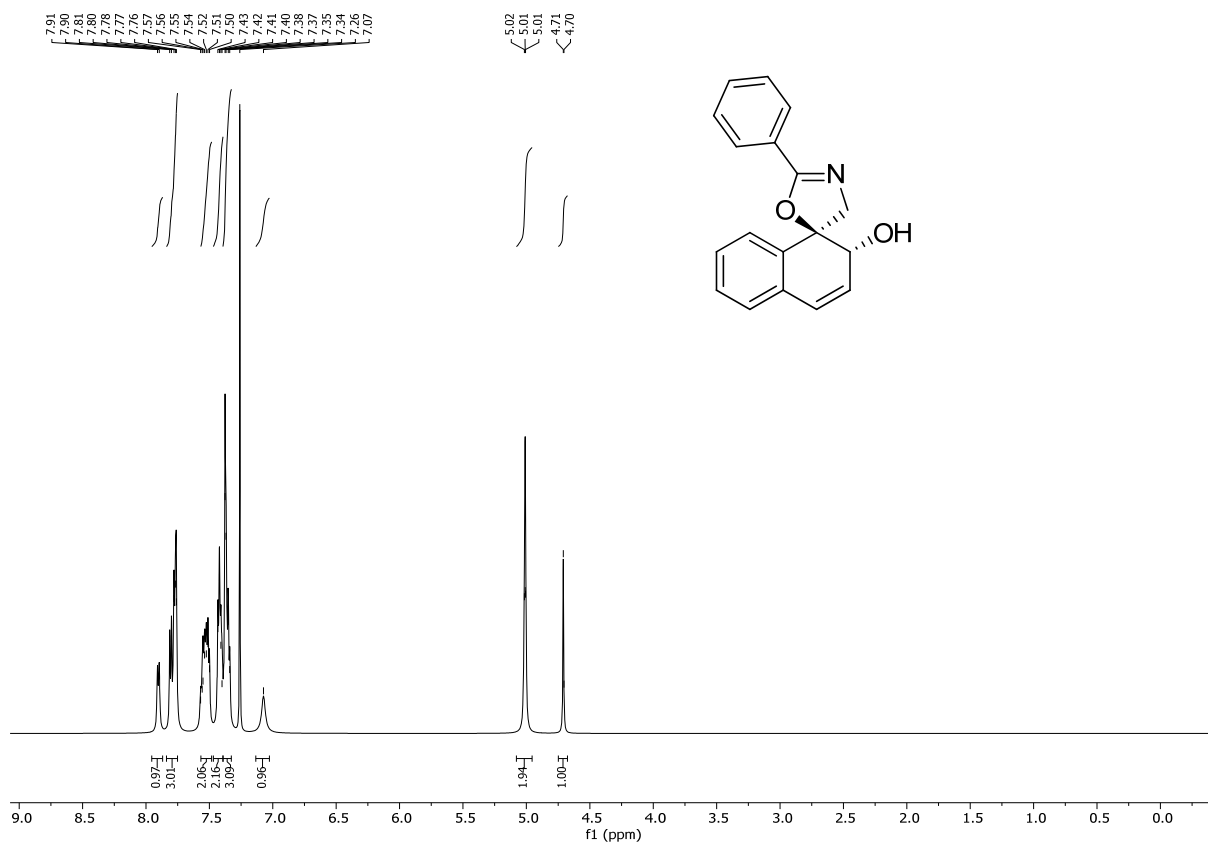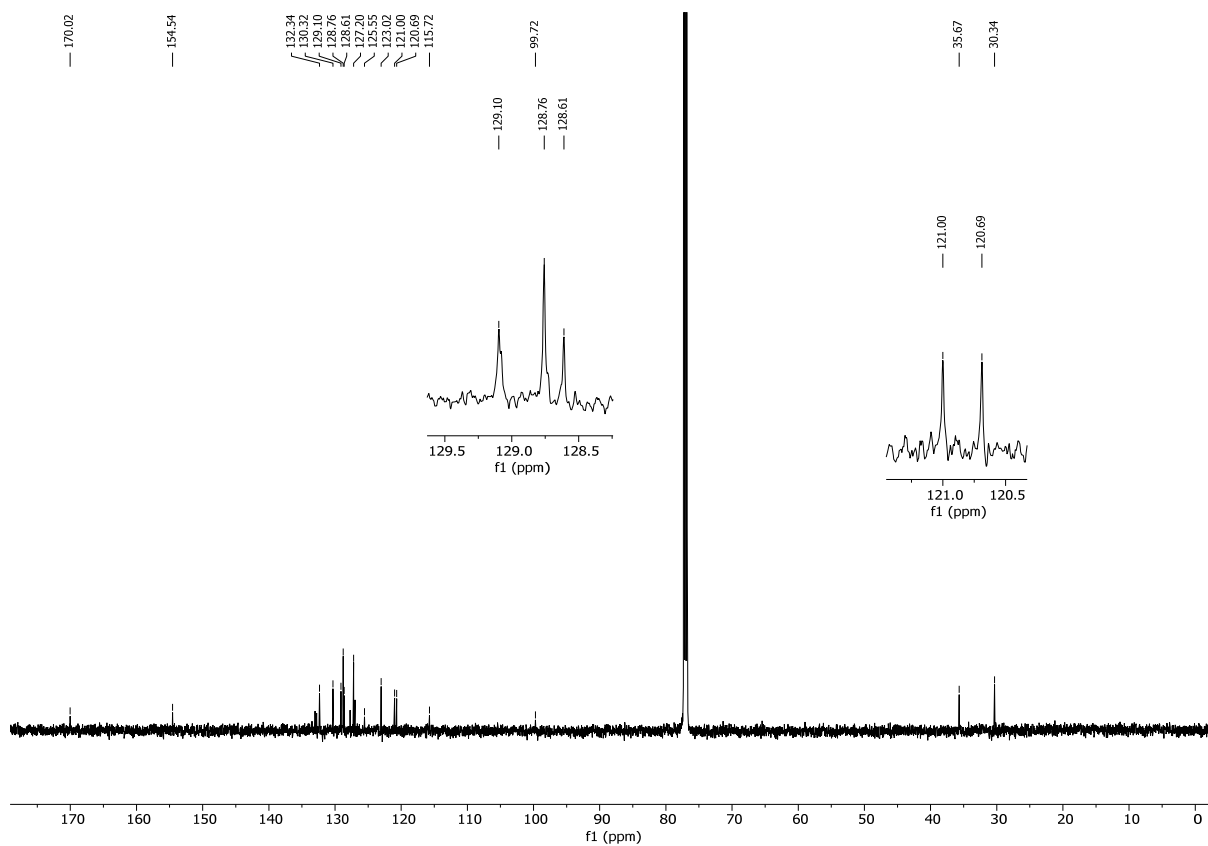

**3.52. NMR of (S)-2'-phenyl-2H,4'H-spiro[benzo[d]oxepine-1,5'-oxazol]-2-one (8) in CDCl<sub>3</sub>**

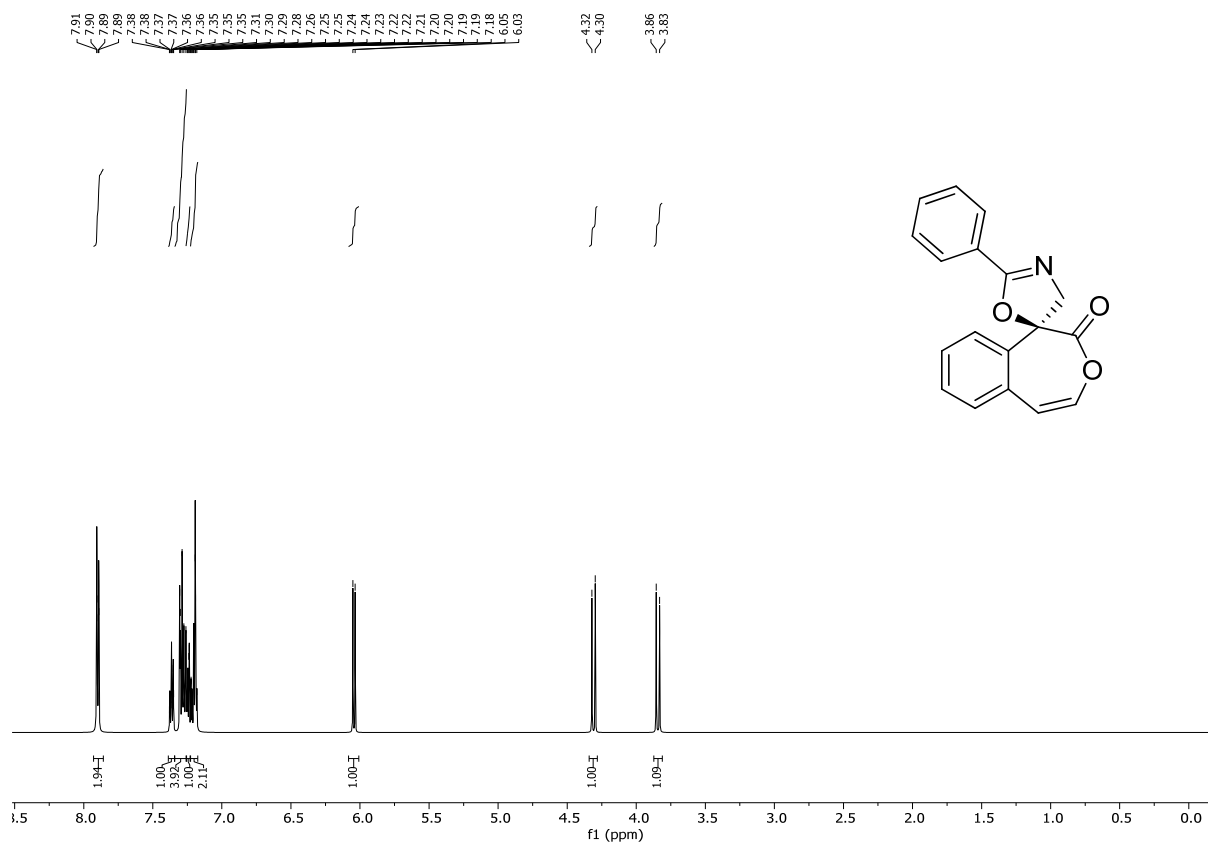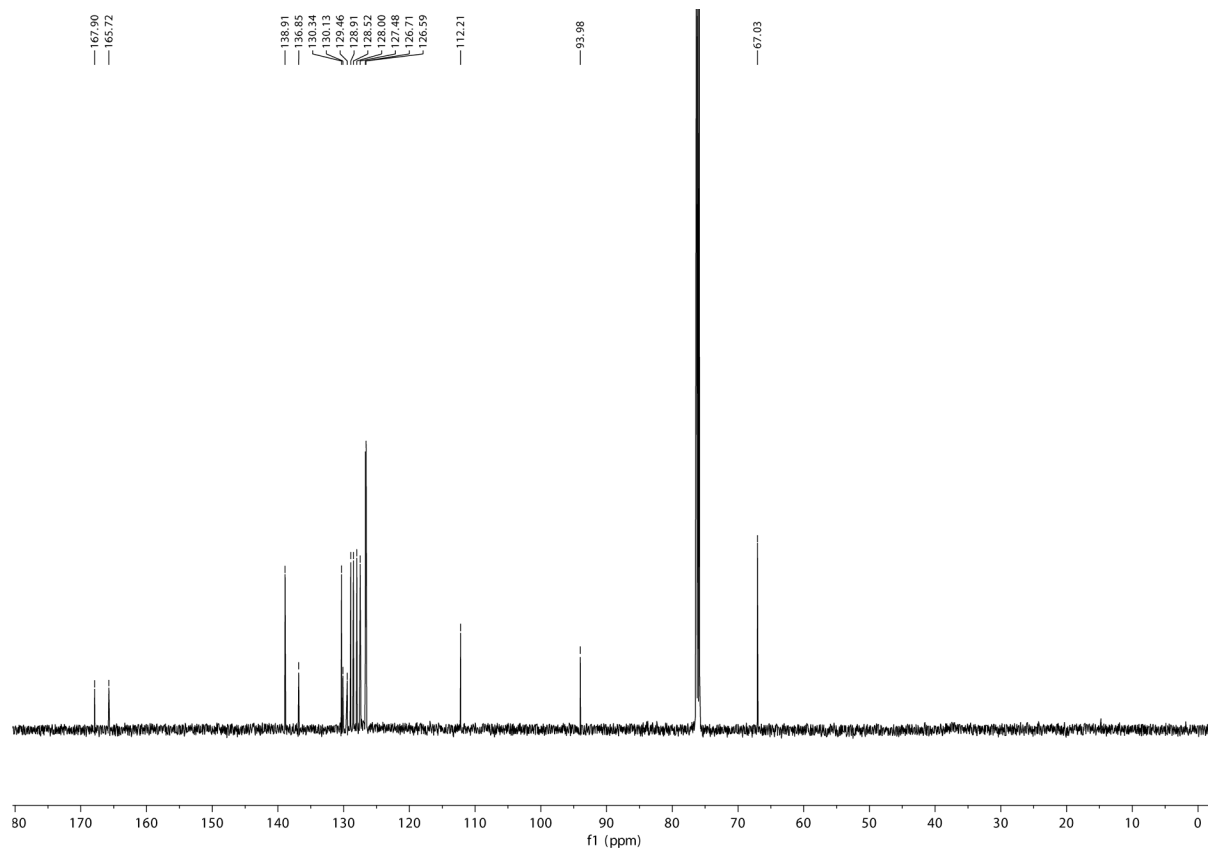

### 3.53. NMR of (Z)-3-(2-(2-phenyloxazol-5-yl)phenyl)acrylaldehyde (9) in CDCl<sub>3</sub>

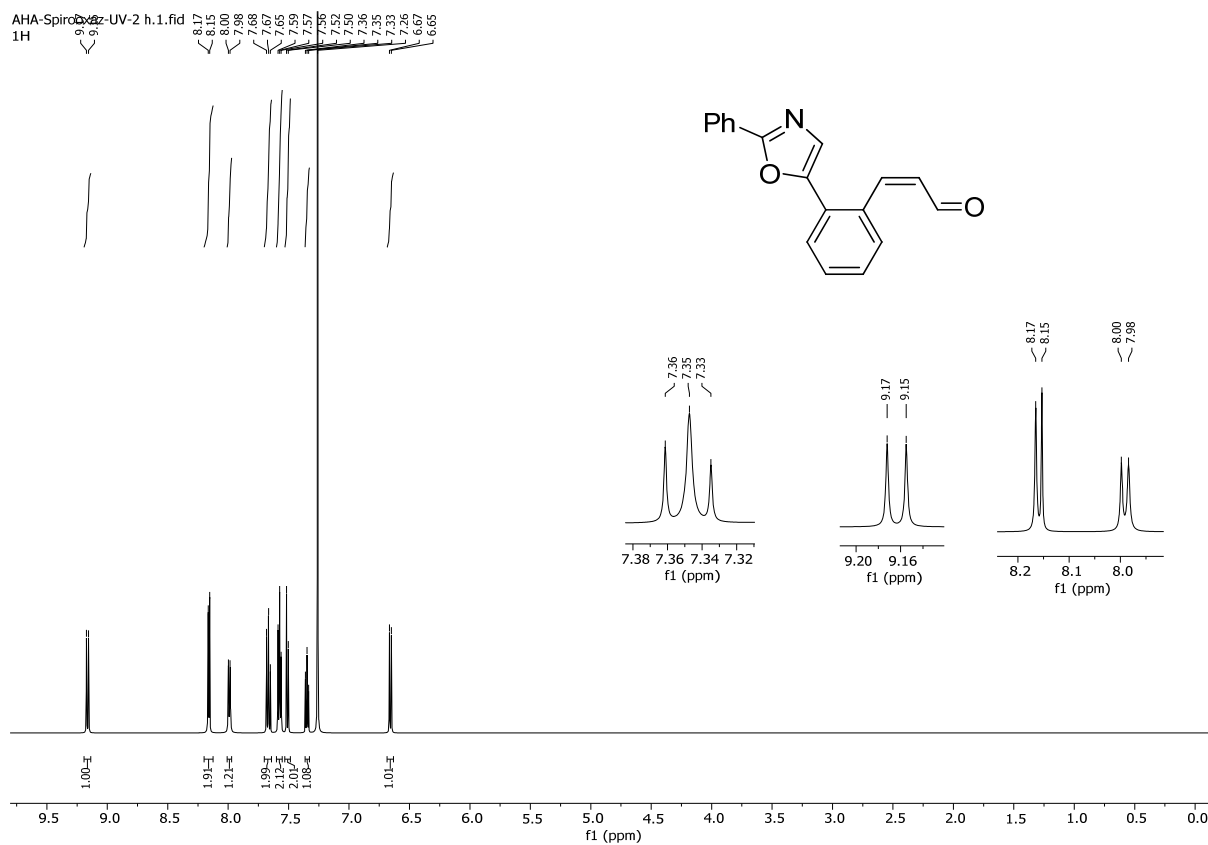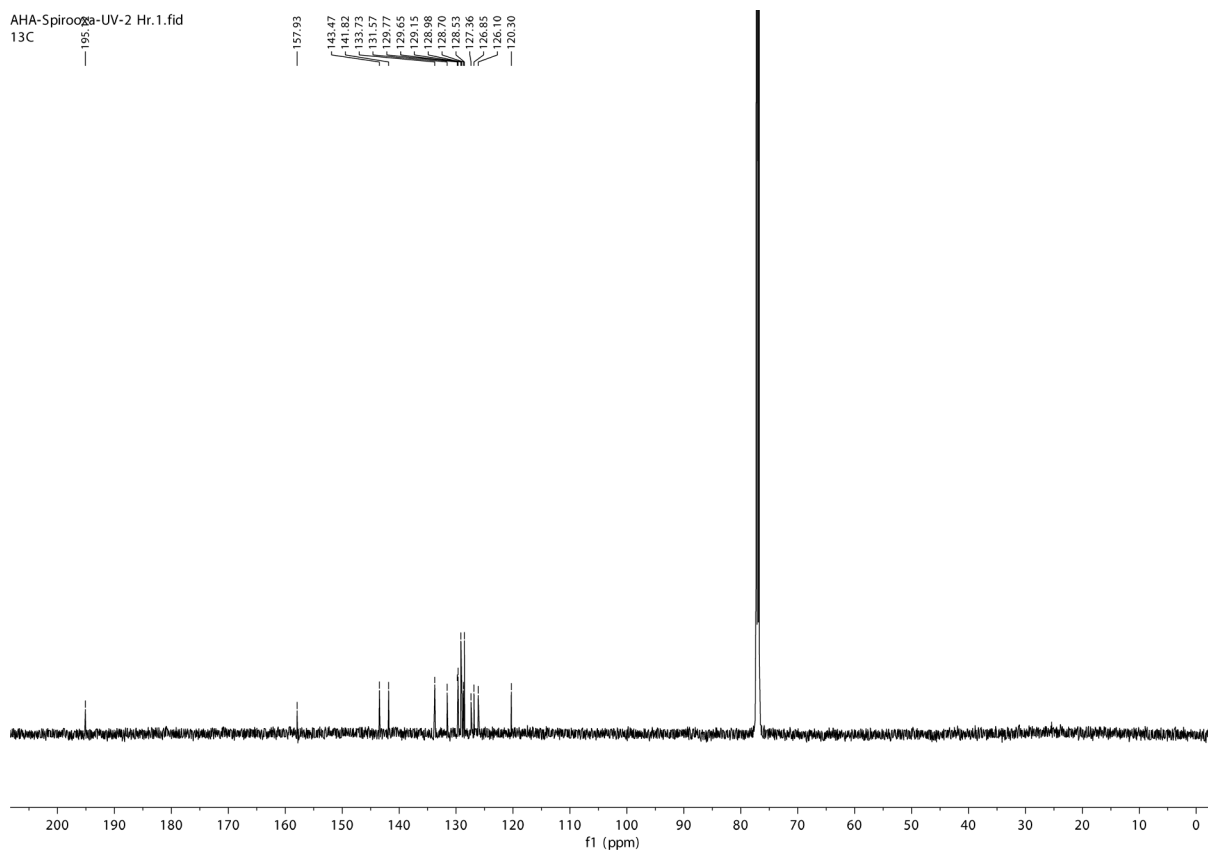

## 4. HPLC Chromatograms

### 4.1. HPLC Chromatograms of Compound (5a)

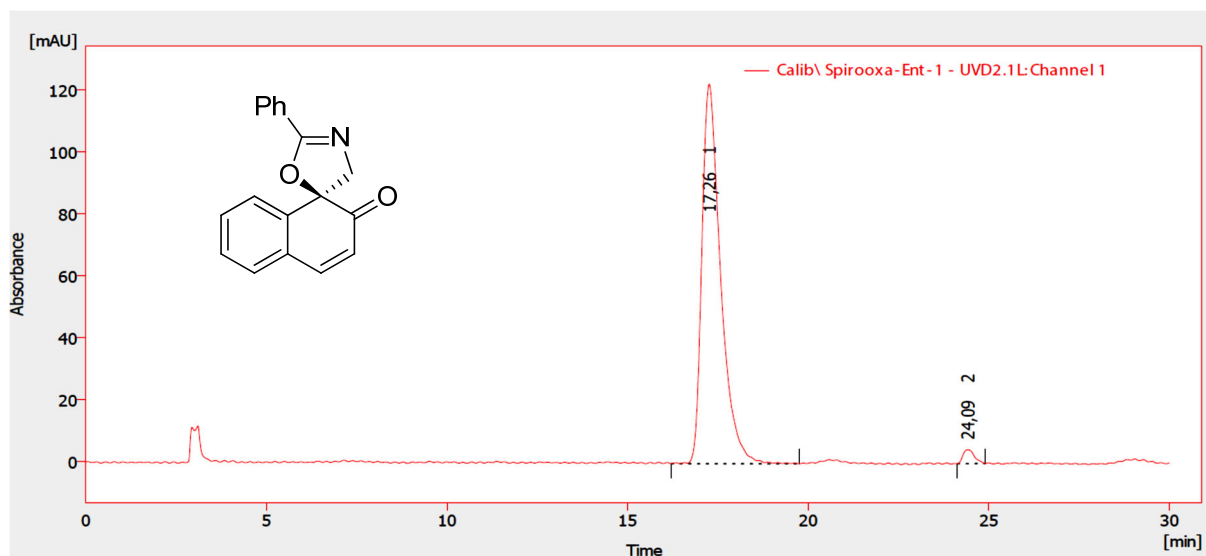

|   | Reten. Time [min] | Area [mAU.s] | Height [mAU] | Area [%] | Height [%] | W05 [min] | Compound Name |
|---|-------------------|--------------|--------------|----------|------------|-----------|---------------|
| 1 | 17,260            | 4425,185     | 122,520      | 97,8     | 96,5       | 0,54      |               |
| 2 | 24,093            | 98,400       | 4,479        | 2,2      | 3,5        | 0,34      |               |
|   | Total             | 4523,584     | 126,998      | 100,0    | 100,0      |           |               |

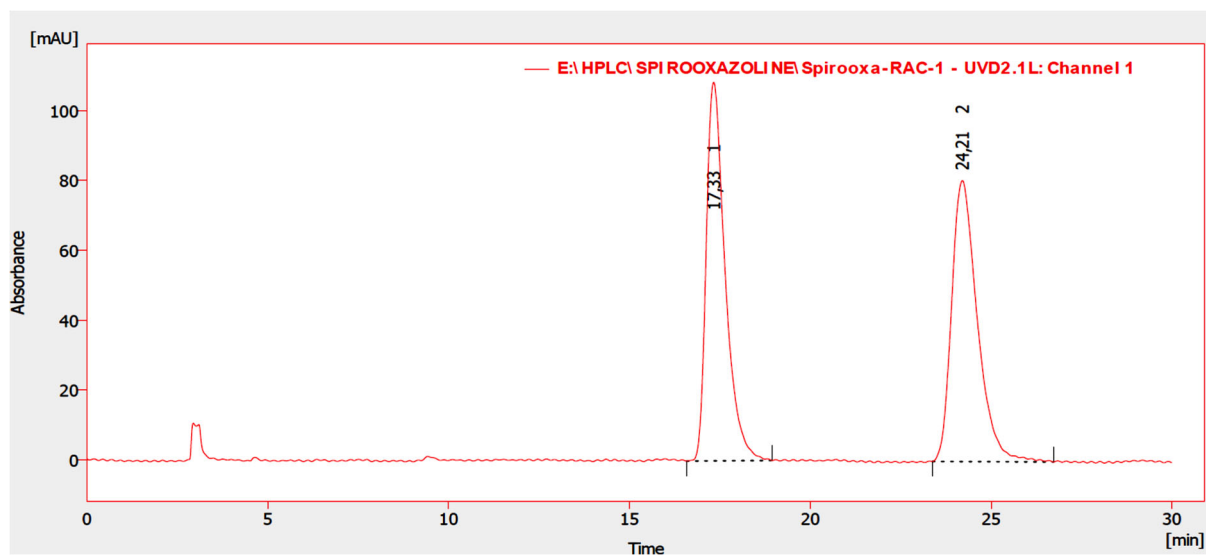

|   | Reten. Time [min] | Area [mAU.s] | Height [mAU] | Area [%] | Height [%] | W05 [min] | Compound Name |
|---|-------------------|--------------|--------------|----------|------------|-----------|---------------|
| 1 | 17,330            | 3930,622     | 108,320      | 49,7     | 57,4       | 0,54      |               |
| 2 | 24,207            | 3972,113     | 80,415       | 50,3     | 42,6       | 0,74      |               |
|   | Total             | 7902,735     | 188,734      | 100,0    | 100,0      |           |               |

## 4.2. HPLC Chromatograms of Compound (5b)

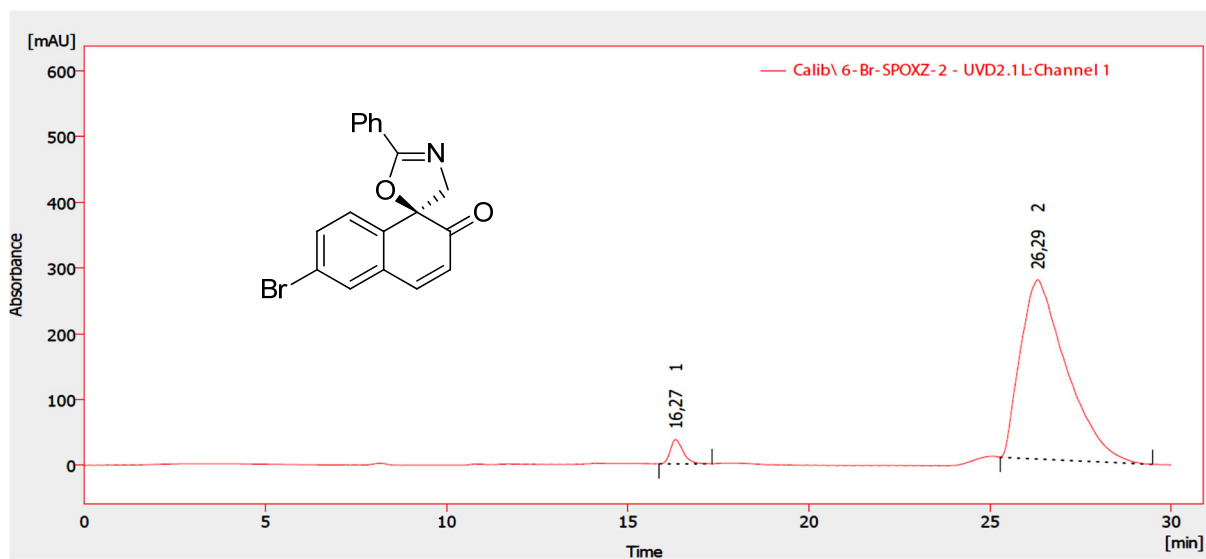

|   | Reten. Time [min] | Area [mAU.s] | Height [mAU] | Area [%] | Height [%] | W05 [min] | Compound Name |
|---|-------------------|--------------|--------------|----------|------------|-----------|---------------|
| 1 | 16,268            | 909,205      | 36,895       | 3,6      | 11,9       | 0,37      |               |
| 2 | 26,287            | 24154,894    | 272,556      | 96,4     | 88,1       | 1,37      |               |
|   | Total             | 25064,099    | 309,451      | 100,0    | 100,0      |           |               |

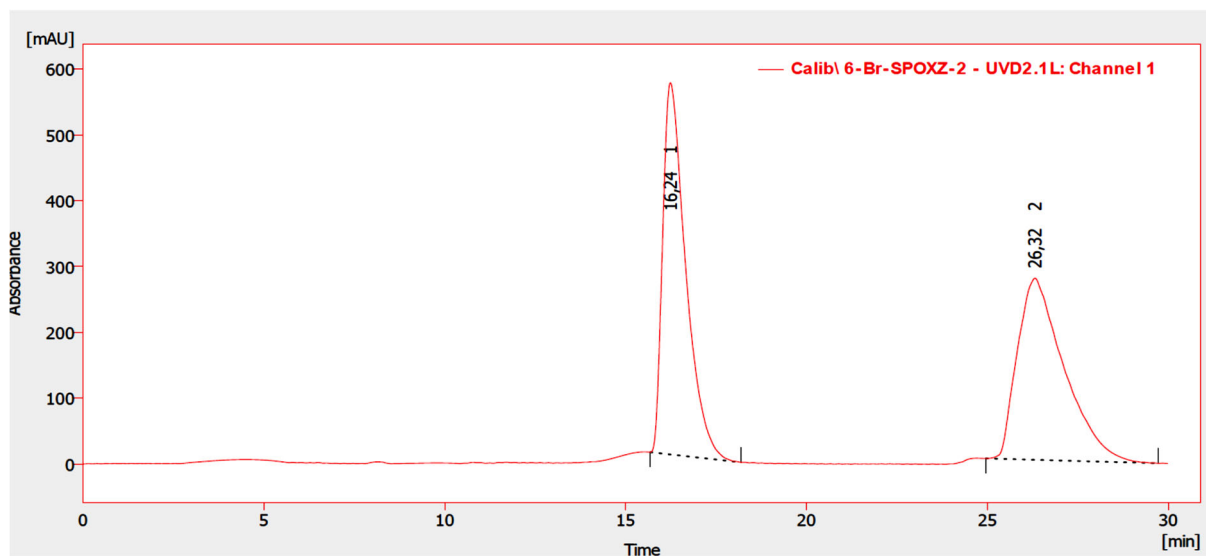

|   | Reten. Time [min] | Area [mAU.s] | Height [mAU] | Area [%] | Height [%] | W05 [min] | Compound Name |
|---|-------------------|--------------|--------------|----------|------------|-----------|---------------|
| 1 | 16,240            | 24981,599    | 564,890      | 50,2     | 67,2       | 0,67      |               |
| 2 | 26,317            | 24760,345    | 276,015      | 49,8     | 32,8       | 1,38      |               |
|   | Total             | 49741,944    | 840,906      | 100,0    | 100,0      |           |               |



### 4.3. HPLC Chromatograms of Compound (5c)

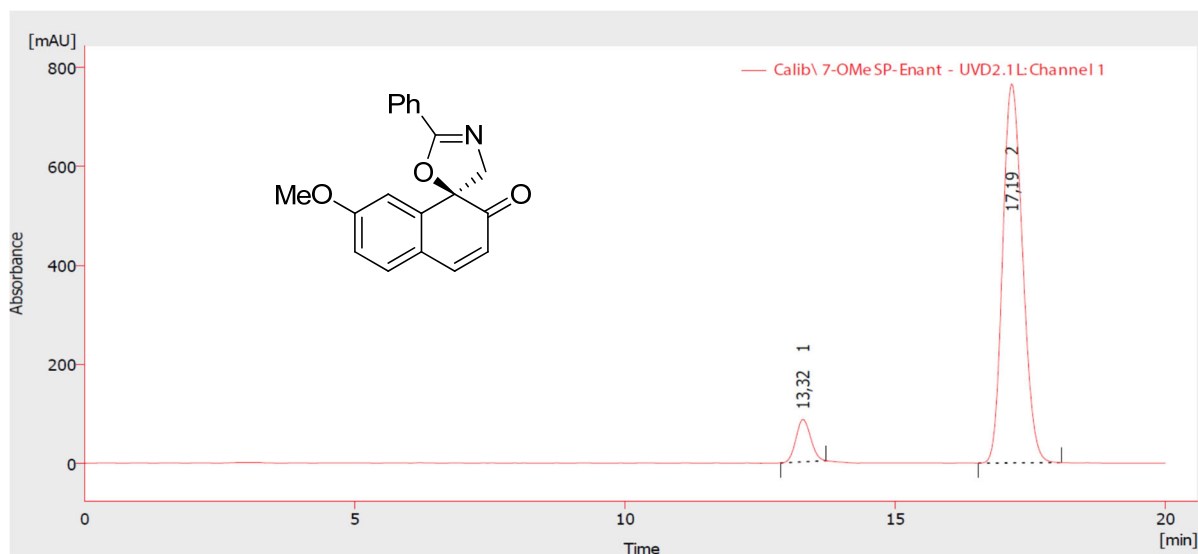

|   | Reten. Time [min] | Area [mAU.s] | Height [mAU] | Area [%] | Height [%] | W05 [min] | Compound Name |
|---|-------------------|--------------|--------------|----------|------------|-----------|---------------|
| 1 | 13,317            | 1592,499     | 89,206       | 7,8      | 10,3       | 0,30      |               |
| 2 | 17,193            | 18824,156    | 776,876      | 92,2     | 89,7       | 0,41      |               |
|   | Total             | 20416,657    | 866,082      | 100,0    | 100,0      |           |               |

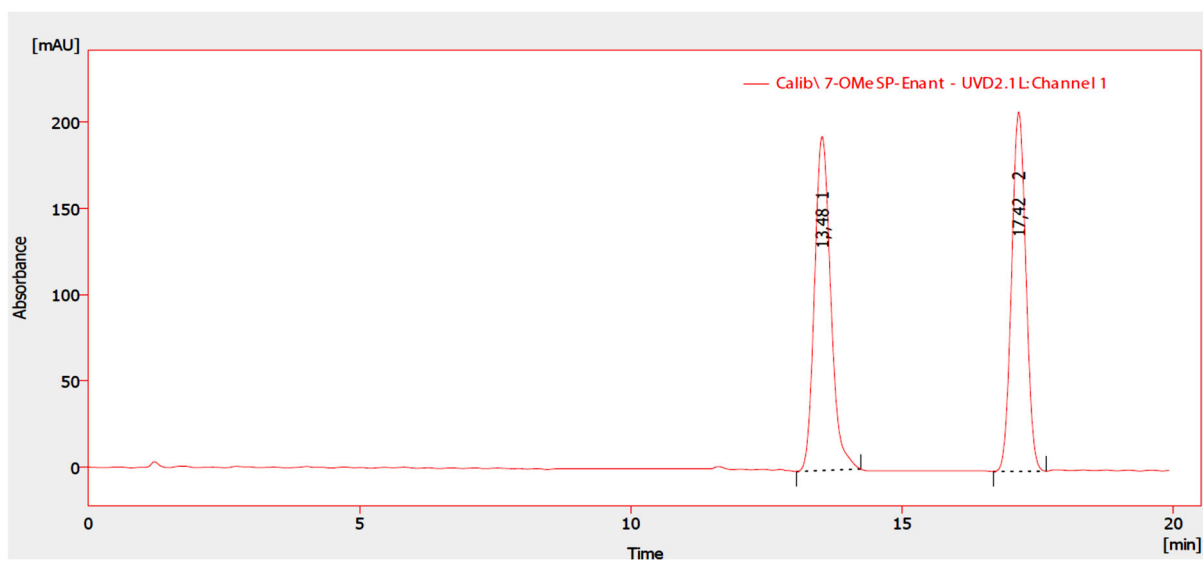

|   | Reten. Time [min] | Area [mAU.s] | Height [mAU] | Area [%] | Height [%] | W05 [min] | Compound Name |
|---|-------------------|--------------|--------------|----------|------------|-----------|---------------|
| 1 | 13,482            | 4135,212     | 196,249      | 50,9     | 48,0       | 0,32      |               |
| 2 | 17,417            | 3988,977     | 212,604      | 49,1     | 52,0       | 0,29      |               |
|   | Total             | 8124,189     | 408,853      | 100,0    | 100,0      |           |               |

#### 4.4. HPLC Chromatograms of Compound (5d)

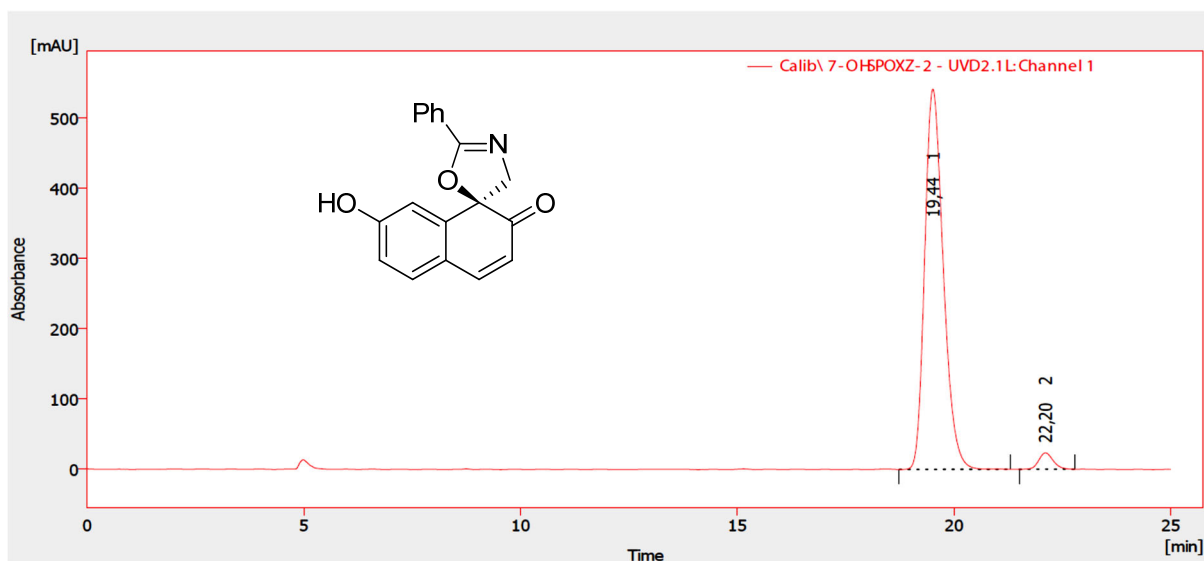

|   | Reten. Time [min] | Area [mAU.s] | Height [mAU] | Area [%] | Height [%] | W05 [min] | Compound Name |
|---|-------------------|--------------|--------------|----------|------------|-----------|---------------|
| 1 | 19,438            | 12950,030    | 548,207      | 96,6     | 95,8       | 0,46      |               |
| 2 | 22,204            | 455,798      | 24,034       | 3,4      | 4,2        | 0,35      |               |
|   | Total             | 13405,828    | 572,241      | 100,0    | 100,0      |           |               |

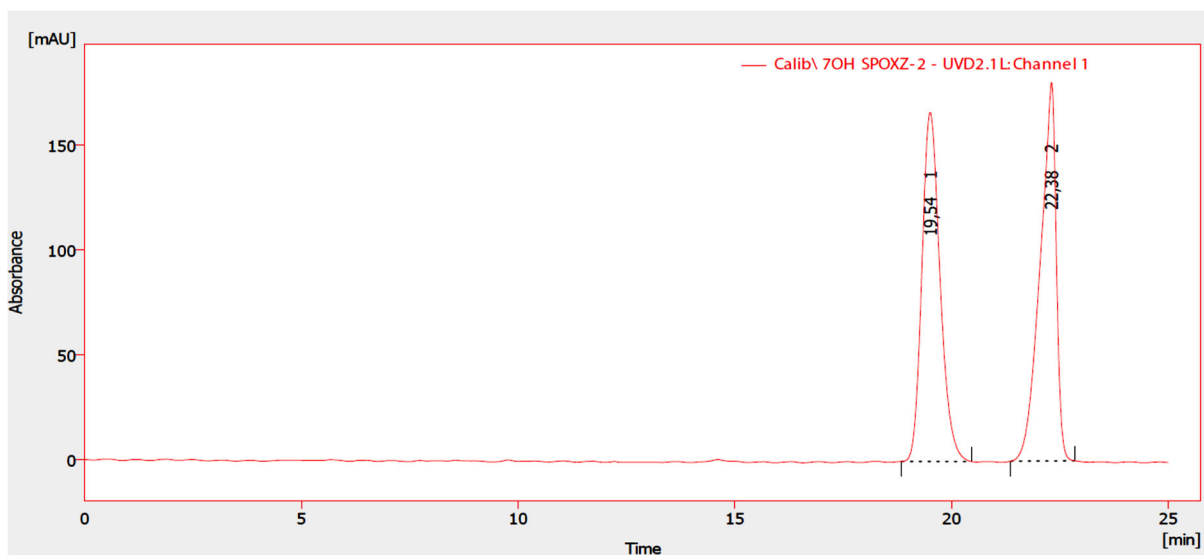

|   | Reten. Time [min] | Area [mAU.s] | Height [mAU] | Area [%] | Height [%] | W05 [min] | Compound Name |
|---|-------------------|--------------|--------------|----------|------------|-----------|---------------|
| 1 | 19,537            | 4431,821     | 174,797      | 50,7     | 48,5       | 0,47      |               |
| 2 | 22,377            | 4309,444     | 185,610      | 49,3     | 51,5       | 0,41      |               |
|   | Total             | 8741,265     | 360,407      | 100,0    | 100,0      |           |               |

## 4.5. HPLC Chromatograms of Compound (5e)

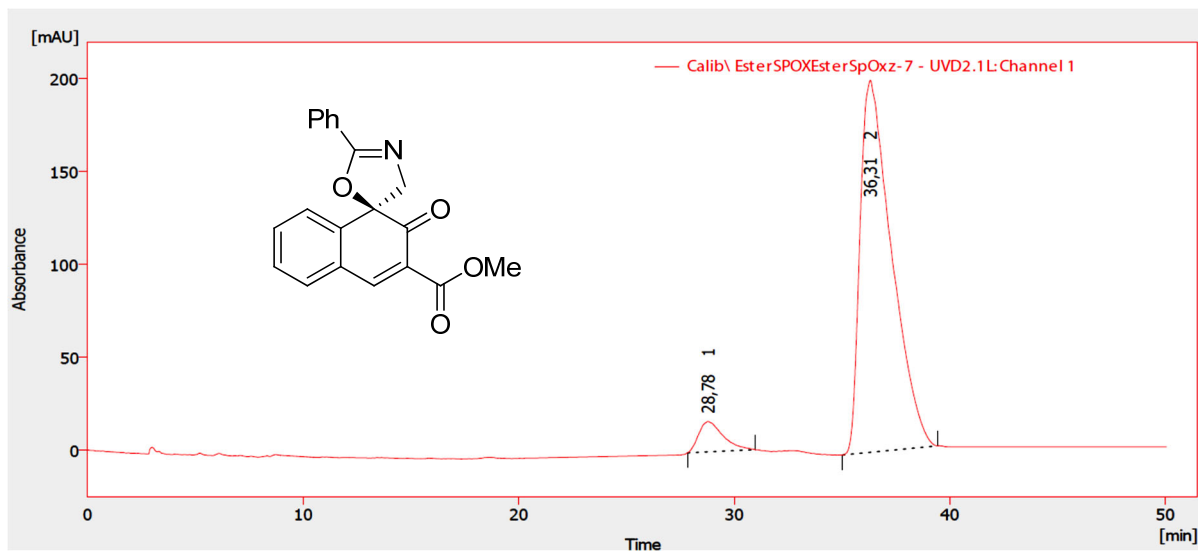

|   | Reten. Time [min] | Area [mAU.s] | Height [mAU] | Area [%] | Height [%] | W05 [min] | Compound Name |
|---|-------------------|--------------|--------------|----------|------------|-----------|---------------|
| 1 | 28,783            | 256,94       | 18,267       | 5,9      | 8,3        | 1,23      |               |
| 2 | 36,310            | 4074,1       | 201,054      | 94,1     | 91,7       | 1,60      |               |
|   | Total             | 4331,07      | 219,321      | 100,0    | 100,0      |           |               |

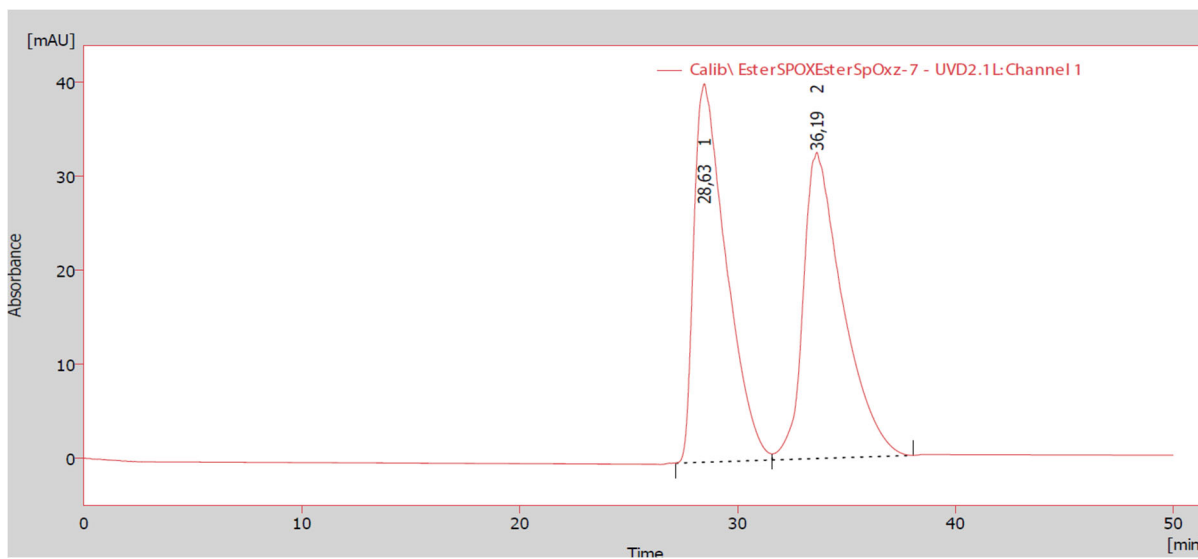

|   | Reten. Time [min] | Area [mAU.s] | Height [mAU] | Area [%] | Height [%] | W05 [min] | Compound Name |
|---|-------------------|--------------|--------------|----------|------------|-----------|---------------|
| 1 | 28,630            | 4160,653     | 40,246       | 50,2     | 55,3       | 1,60      |               |
| 2 | 36,193            | 4130,122     | 32,570       | 49,8     | 44,7       | 1,87      |               |
|   | Total             | 8290,774     | 72,815       | 100,0    | 100,0      |           |               |

## 4.6. HPLC Chromatograms of Compound (5f)

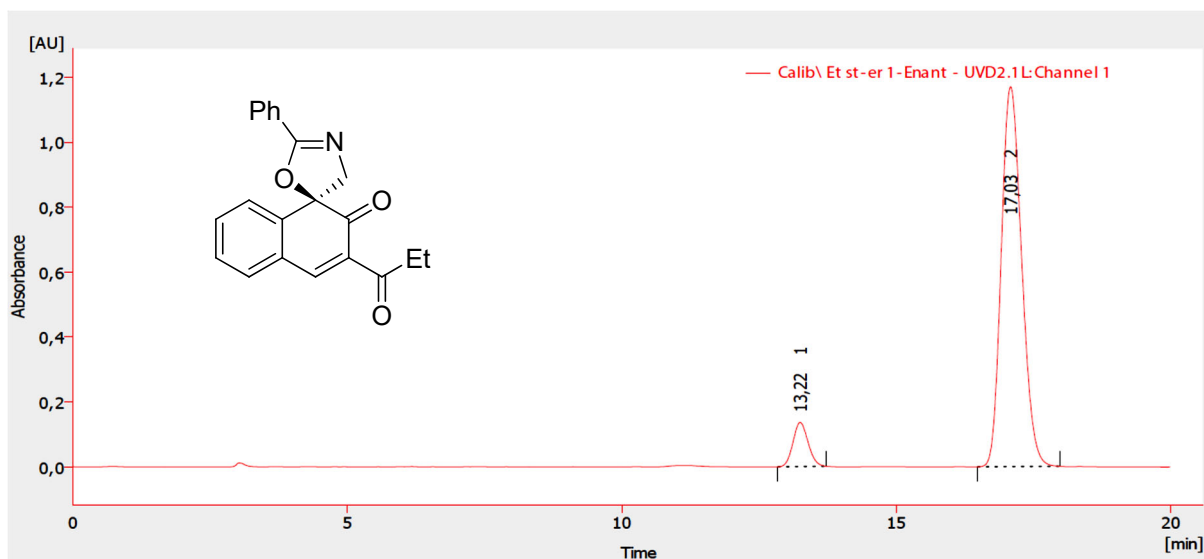

|   | Reten. Time [min] | Area [mAU.s] | Height [mAU] | Area [%] | Height [%] | W05 [min] | Compound Name |
|---|-------------------|--------------|--------------|----------|------------|-----------|---------------|
| 1 | 13,221            | 2328,065     | 135,243      | 8,1      | 10,3       | 0,30      |               |
| 2 | 17,033            | 26413,482    | 1177,799     | 91,9     | 89,7       | 0,41      |               |
|   | Total             | 28741,547    | 1313,042     | 100,0    | 100,0      |           |               |

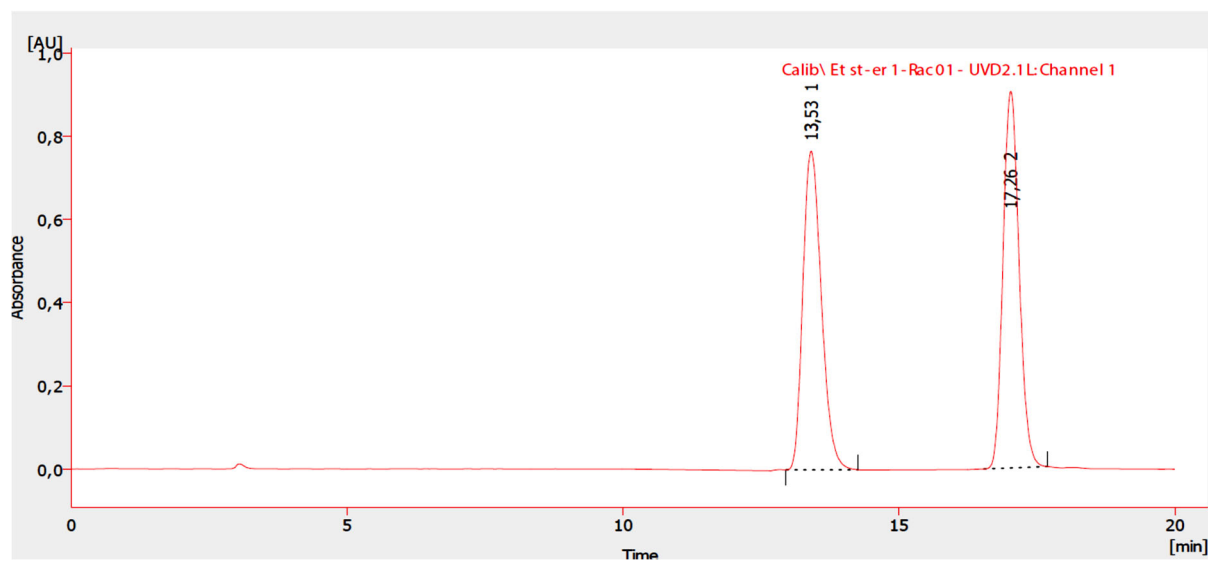

|   | Reten. Time [min] | Area [mAU.s] | Height [mAU] | Area [%] | Height [%] | W05 [min] | Compound Name |
|---|-------------------|--------------|--------------|----------|------------|-----------|---------------|
| 1 | 13,527            | 9734,285     | 909,065      | 49,1     | 48,2       | 0,31      |               |
| 2 | 17,258            | 10091,142    | 976,963      | 50,9     | 51,8       | 0,40      |               |
|   | Total             | 19825,427    | 1886,028     | 100,0    | 100,0      |           |               |

#### 4.7. HPLC Chromatograms of compound (5g)

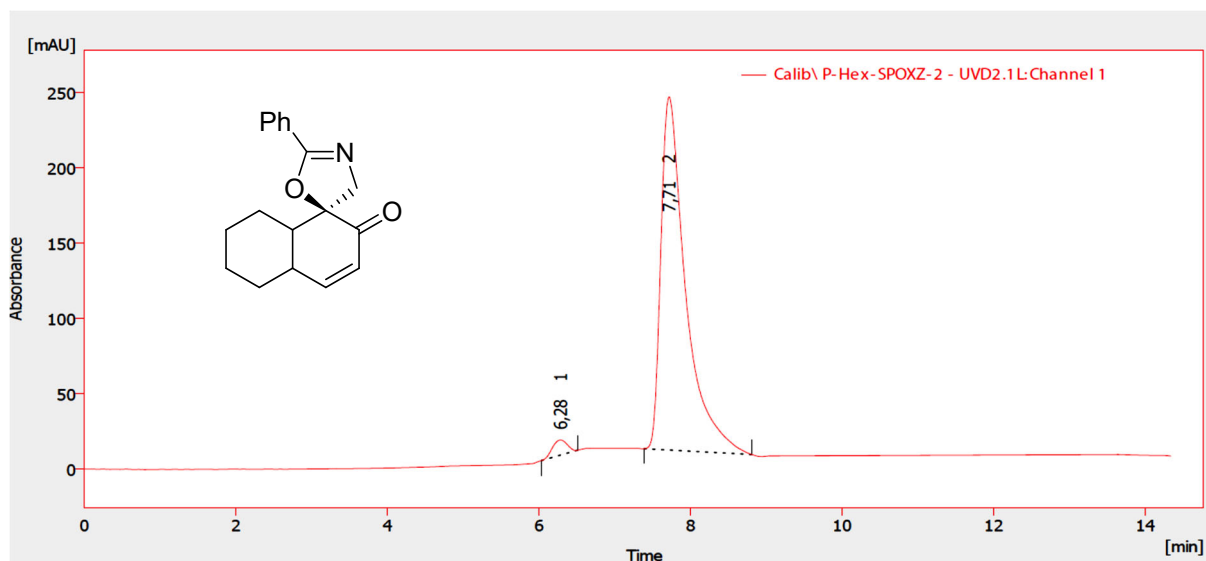

|   | Reten. Time [min] | Area [mAU.s] | Height [mAU] | Area [%] | Height [%] | W05 [min] | Compound Name |
|---|-------------------|--------------|--------------|----------|------------|-----------|---------------|
| 1 | 6,283             | 136,279      | 10,020       | 2,5      | 4,1        | 0,24      |               |
| 2 | 7,713             | 5317,273     | 234,586      | 97,5     | 95,9       | 0,32      |               |
|   | Total             | 5453,552     | 244,606      | 100,0    | 100,0      |           |               |

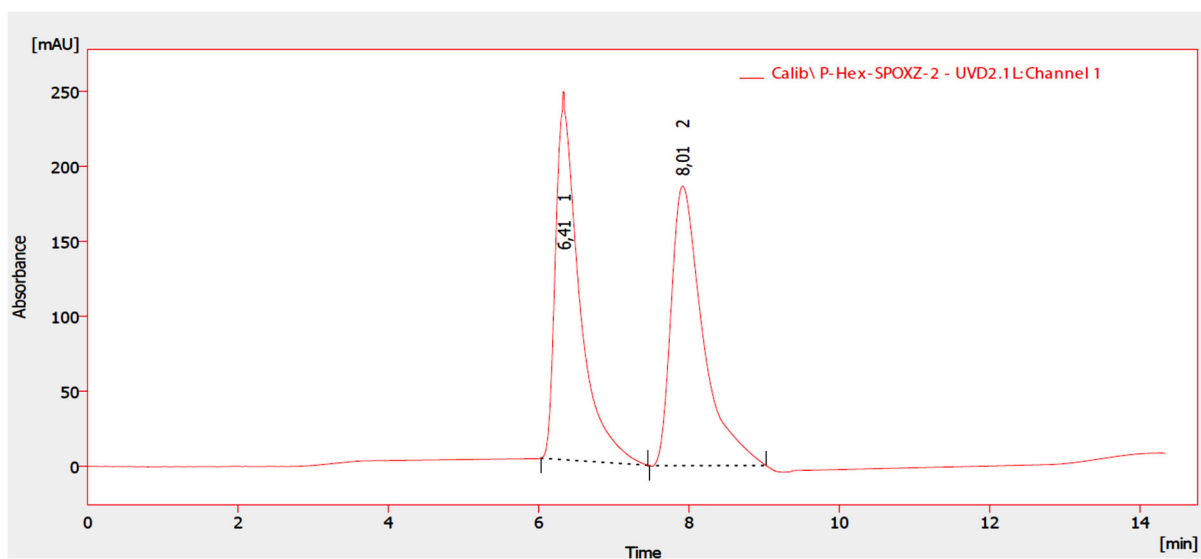

|   | Reten. Time [min] | Area [mAU.s] | Height [mAU] | Area [%] | Height [%] | W05 [min] | Compound Name |
|---|-------------------|--------------|--------------|----------|------------|-----------|---------------|
| 1 | 6,413             | 5320,597     | 234,381      | 49,0     | 55,5       | 0,32      |               |
| 2 | 8,011             | 5548,439     | 187,389      | 51,0     | 44,5       | 0,43      |               |
|   | Total             | 10869,036    | 421,770      | 100,0    | 100,0      |           |               |

#### 4.8. HPLC Chromatograms of compound (5h)

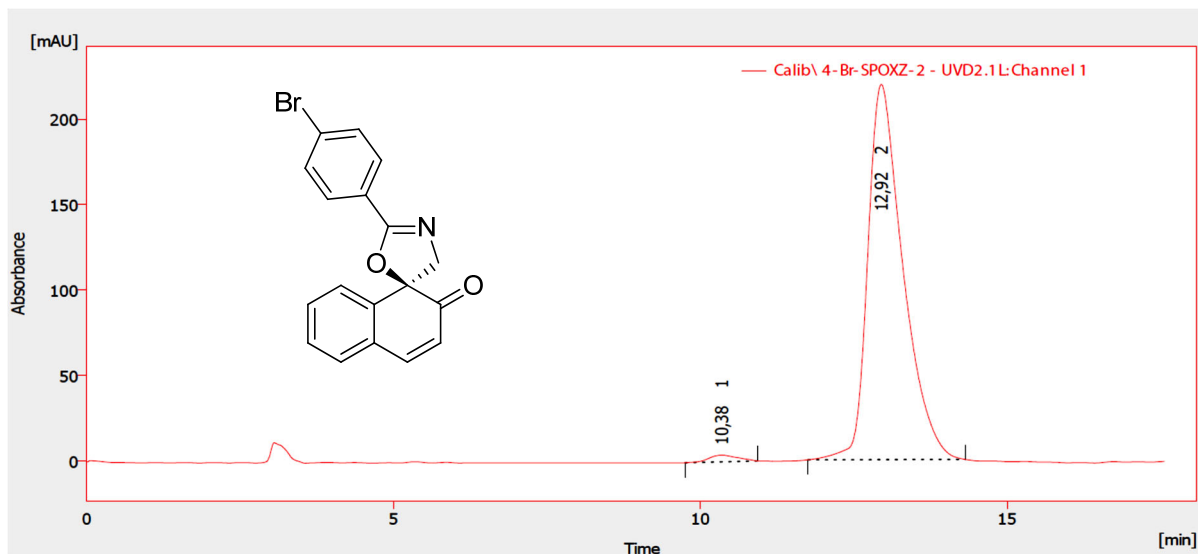

|   | Reten. Time [min] | Area [mAU.s] | Height [mAU] | Area [%] | Height [%] | W05 [min] | Compound Name |
|---|-------------------|--------------|--------------|----------|------------|-----------|---------------|
| 1 | 10,381            | 128,611      | 3,967        | 1,4      | 1,8        | 0,56      |               |
| 2 | 12,918            | 8776,824     | 219,861      | 98,6     | 98,2       | 0,60      |               |
|   | Total             | 8905,435     | 223,827      | 100,0    | 100,0      |           |               |

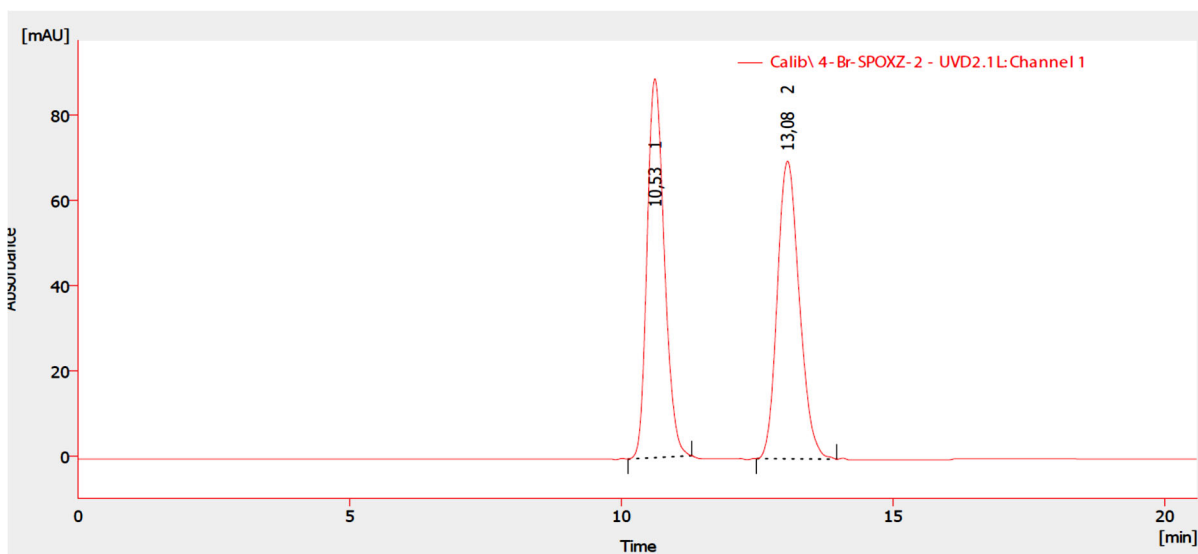

|   | Reten. Time [min] | Area [mAU.s] | Height [mAU] | Area [%] | Height [%] | W05 [min] | Compound Name |
|---|-------------------|--------------|--------------|----------|------------|-----------|---------------|
| 1 | 10,527            | 2054,644     | 89,868       | 49,8     | 56,0       | 0,32      |               |
| 2 | 13,082            | 2071,147     | 70,610       | 50,2     | 44,0       | 0,43      |               |
|   | Total             | 4125,791     | 160,478      | 100,0    | 100,0      |           |               |

## 4.9. HPLC Chromatograms of compound (5i)

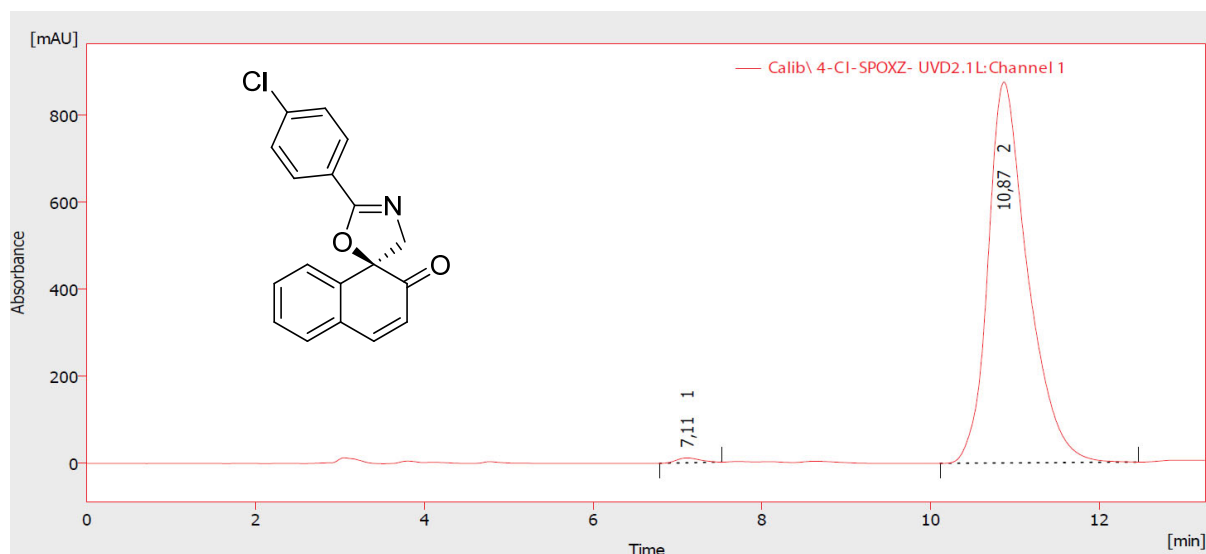

|   | Reten. Time [min] | Area [mAU.s] | Height [mAU] | Area [%] | Height [%] | W05 [min] | Compound Name |
|---|-------------------|--------------|--------------|----------|------------|-----------|---------------|
| 1 | 7,113             | 404,915      | 11,287       | 1,4      | 1,3        | 0,32      |               |
| 2 | 10,870            | 28517,580    | 874,663      | 98,6     | 98,7       | 0,48      |               |
|   | Total             | 28922,495    | 885,950      | 100,0    | 100,0      |           |               |

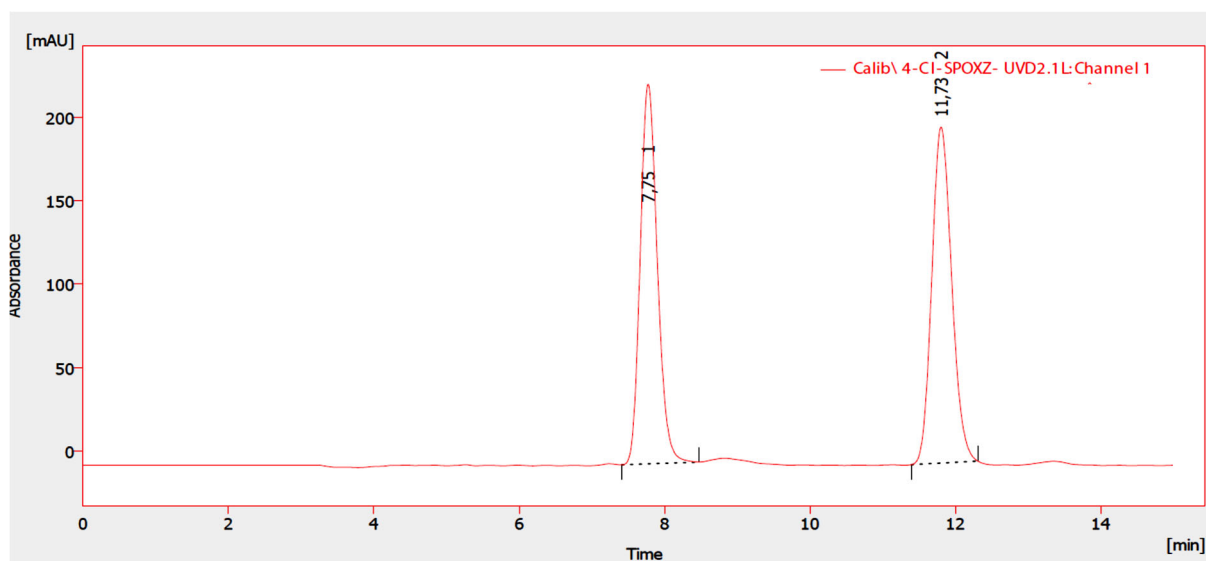

|   | Reten. Time [min] | Area [mAU.s] | Height [mAU] | Area [%] | Height [%] | W05 [min] | Compound Name |
|---|-------------------|--------------|--------------|----------|------------|-----------|---------------|
| 1 | 7,753             | 3680,792     | 227,292      | 49,2     | 53,1       | 0,25      |               |
| 2 | 11,727            | 3800,493     | 201,152      | 50,8     | 46,9       | 0,30      |               |
|   | Total             | 7481,285     | 428,445      | 100,0    | 100,0      |           |               |

#### 4.10. HPLC Chromatograms of compound (5j)

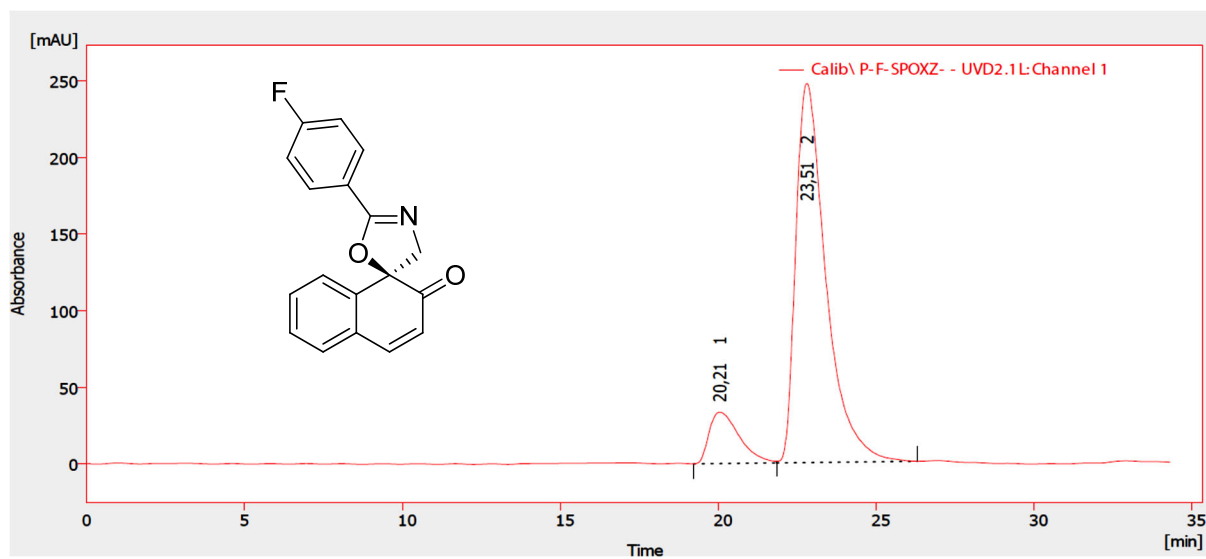

|   | Reten. Time [min] | Area [mAU.s] | Height [mAU] | Area [%] | Height [%] | W05 [min] | Compound Name |
|---|-------------------|--------------|--------------|----------|------------|-----------|---------------|
| 1 | 20,210            | 444,816      | 33,485       | 11,9     | 11,9       | 0,31      |               |
| 2 | 23,513            | 3283,540     | 247,311      | 88,1     | 88,1       | 0,30      |               |
|   | Total             | 3728,356     | 280,796      | 100,0    | 100,0      |           |               |

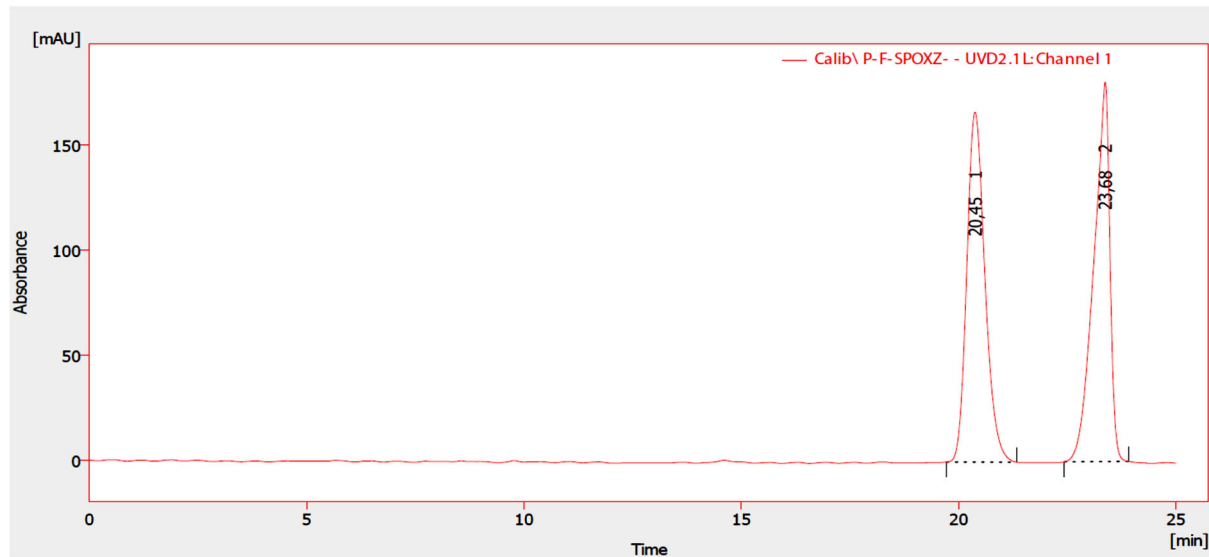

|   | Reten. Time [min] | Area [mAU.s] | Height [mAU] | Area [%] | Height [%] | W05 [min] | Compound Name |
|---|-------------------|--------------|--------------|----------|------------|-----------|---------------|
| 1 | 20,452            | 4682,379     | 165,231      | 50,7     | 48,0       | 0,46      |               |
| 2 | 23,677            | 4553,083     | 179,001      | 49,3     | 52,0       | 0,42      |               |
|   | Total             | 9235,462     | 344,232      | 100,0    | 100,0      |           |               |



#### 4.11. HPLC Chromatograms of compound(5k)

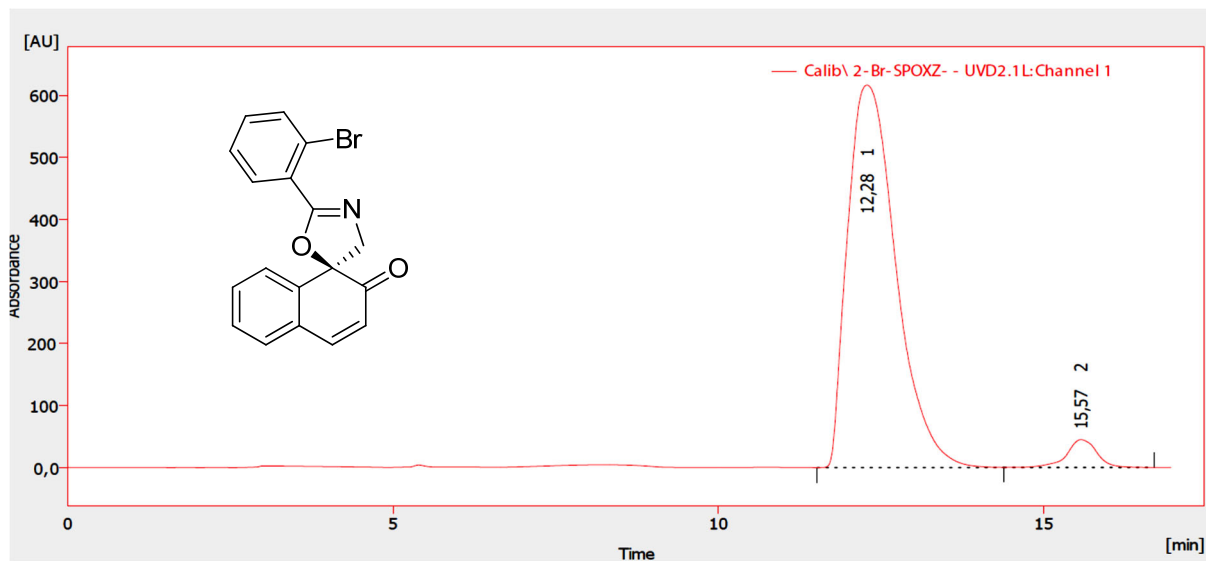

|   | Reten. Time [min] | Area [mAU.s] | Height [mAU] | Area [%] | Height [%] | W05 [min] | Compound Name |
|---|-------------------|--------------|--------------|----------|------------|-----------|---------------|
| 1 | 12,281            | 11199,251    | 683,214      | 95,6     | 93,2       | 0,81      |               |
| 2 | 15,570            | 515,447      | 54,703       | 4,4      | 6,8        | 0,47      |               |
|   | Total             | 11714,698    | 737,917      | 100,0    | 100,0      |           |               |

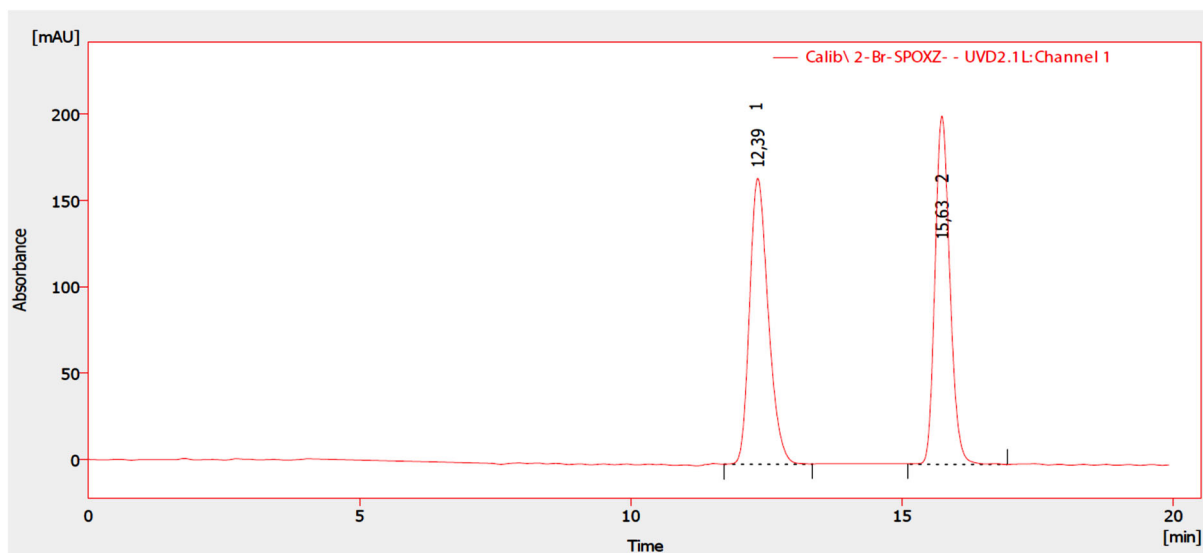

|   | Reten. Time [min] | Area [mAU.s] | Height [mAU] | Area [%] | Height [%] | W05 [min] | Compound Name |
|---|-------------------|--------------|--------------|----------|------------|-----------|---------------|
| 1 | 12,387            | 4068,952     | 162,602      | 50,6     | 44,9       | 0,34      |               |
| 2 | 15,631            | 3972,455     | 204,641      | 49,4     | 55,1       | 0,29      |               |
|   | Total             | 8041,407     | 367,243      | 100,0    | 100,0      |           |               |

#### 4.12. HPLC Chromatograms of compound (5)

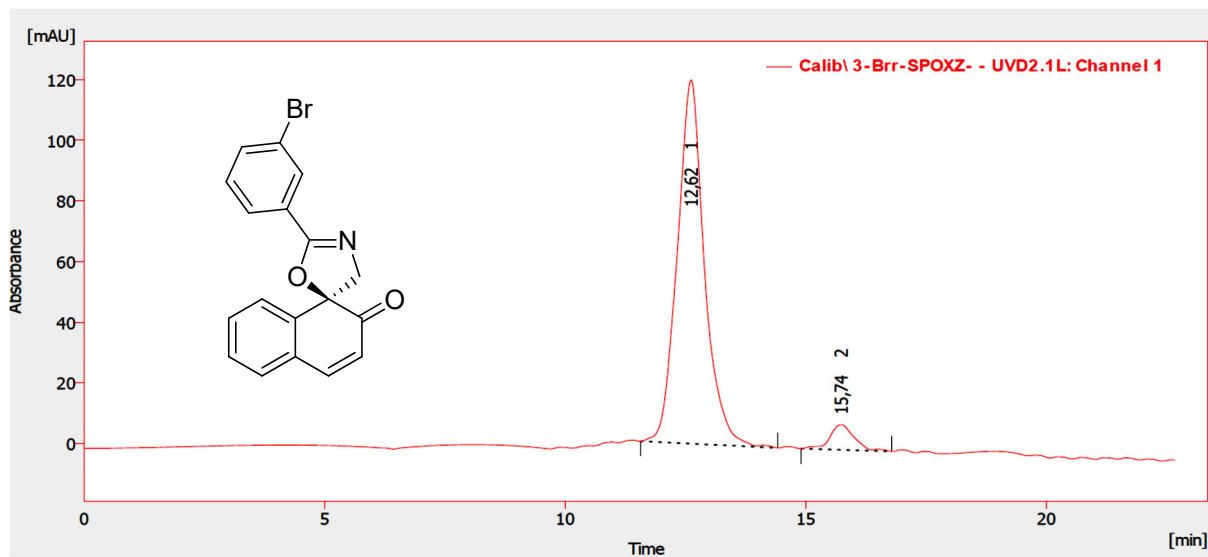

|   | Reten. Time [min] | Area [mAU.s] | Height [mAU] | Area [%] | Height [%] | W05 [min] | Compound Name |
|---|-------------------|--------------|--------------|----------|------------|-----------|---------------|
| 1 | 12,620            | 4708,612     | 119,867      | 94,1     | 93,5       | 0,57      |               |
| 2 | 15,740            | 293,988      | 8,281        | 5,9      | 6,5        | 0,51      |               |
|   | Total             | 5002,599     | 128,147      | 100,0    | 100,0      |           |               |

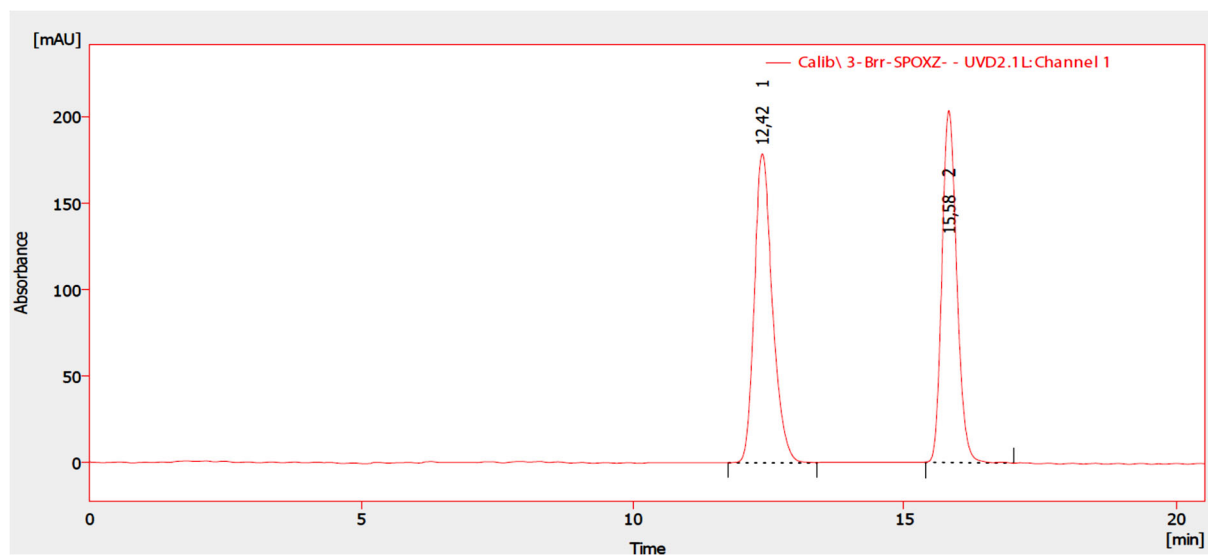

|   | Reten. Time [min] | Area [mAU.s] | Height [mAU] | Area [%] | Height [%] | W05 [min] | Compound Name |
|---|-------------------|--------------|--------------|----------|------------|-----------|---------------|
| 1 | 12,420            | 4267,242     | 183,678      | 50,6     | 48,2       | 0,33      |               |
| 2 | 15,578            | 4166,042     | 197,397      | 49,4     | 51,8       | 0,30      |               |
|   | Total             | 8433,284     | 381,075      | 100,0    | 100,0      |           |               |

### 4.13. HPLC Chromatograms of compound (5m)

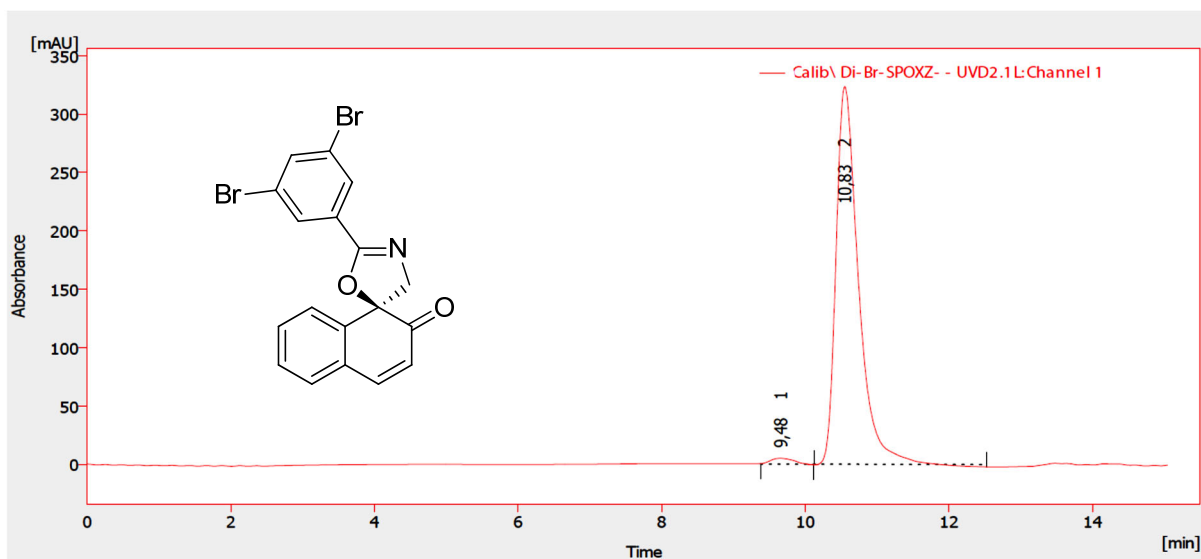

|   | Reten. Time [min] | Area [mAU.s] | Height [mAU] | Area [%] | Height [%] | W05 [min] | Compound Name |
|---|-------------------|--------------|--------------|----------|------------|-----------|---------------|
| 1 | 9,430             | 447,184      | 5,686        | 5,9      | 1,7        | 0,15      |               |
| 2 | 10,831            | 7139,793     | 324,178      | 94,1     | 98,3       | 0,32      |               |
|   | Total             | 7586,977     | 329,864      | 100,0    | 100,0      |           |               |

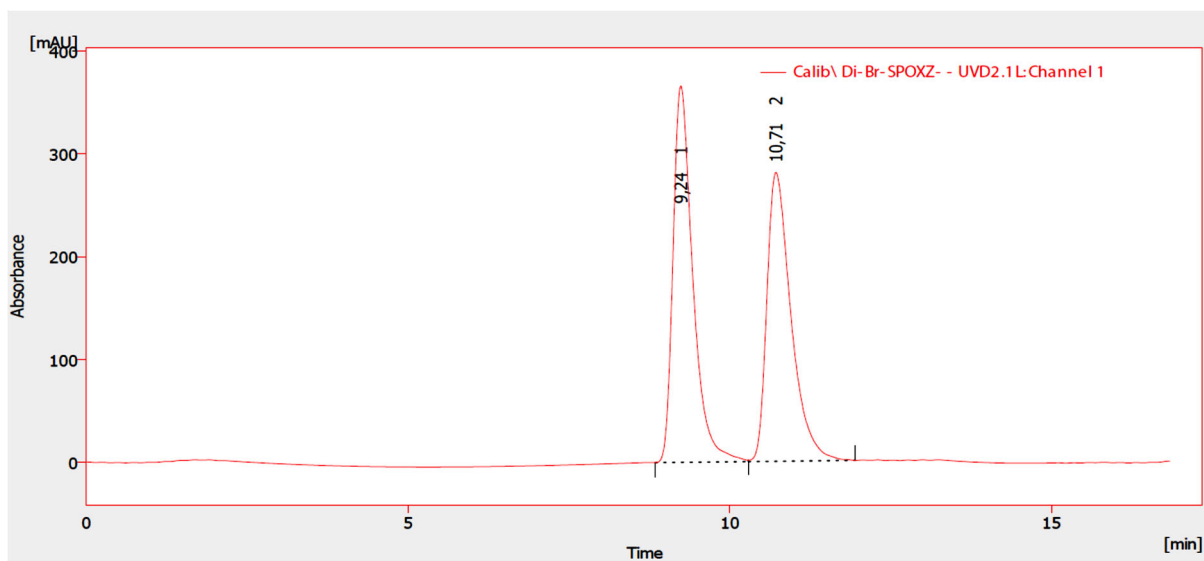

|   | Reten. Time [min] | Area [mAU.s] | Height [mAU] | Area [%] | Height [%] | W05 [min] | Compound Name |
|---|-------------------|--------------|--------------|----------|------------|-----------|---------------|
| 1 | 9,240             | 7688,476     | 366,351      | 50,6     | 56,6       | 0,32      |               |
| 2 | 10,713            | 7536,530     | 281,128      | 49,4     | 43,4       | 0,39      |               |
|   | Total             | 15225,006    | 647,479      | 100,0    | 100,0      |           |               |

#### 4.14. HPLC Chromatograms of compound (5n)

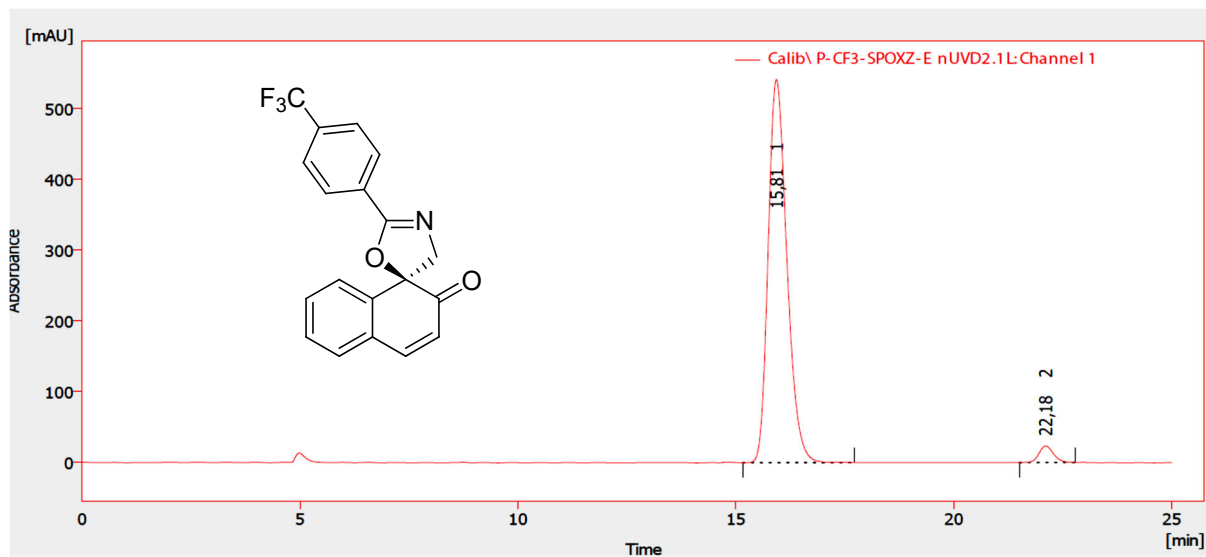

|   | Reten. Time [min] | Area [mAU.s] | Height [mAU] | Area [%] | Height [%] | W05 [min] | Compound Name |
|---|-------------------|--------------|--------------|----------|------------|-----------|---------------|
| 1 | 15,813            | 16135,837    | 540,961      | 96,8     | 95,9       | 0,46      |               |
| 2 | 22,182            | 539,911      | 23,380       | 3,2      | 4,1        | 0,35      |               |
|   | Total             | 16675,748    | 564,341      | 100,0    | 100,0      |           |               |

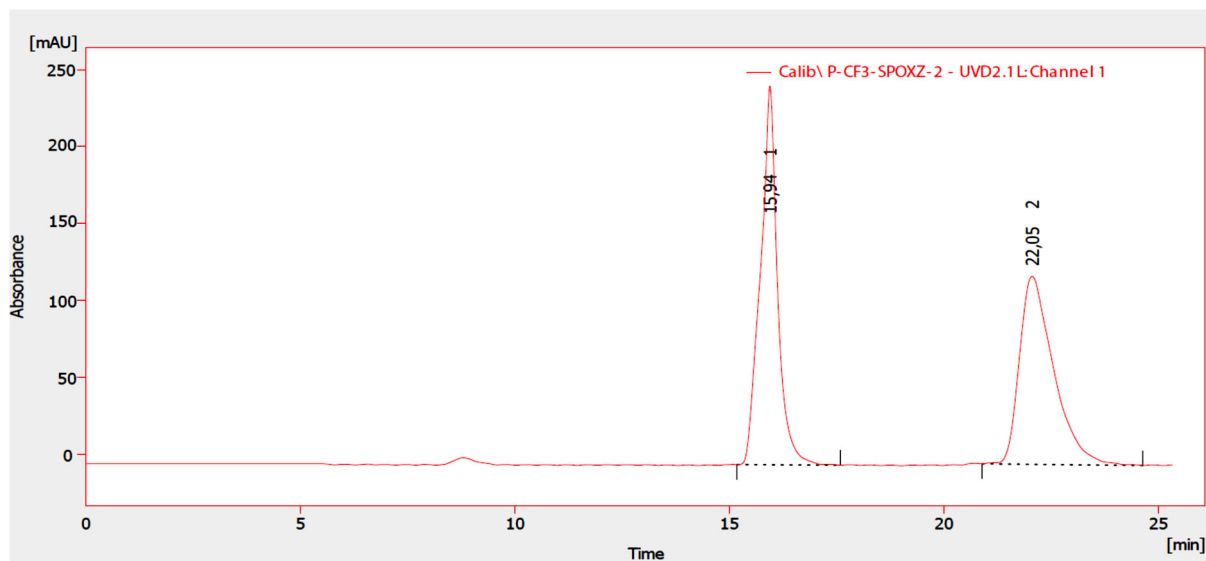

|   | Reten. Time [min] | Area [mAU.s] | Height [mAU] | Area [%] | Height [%] | W05 [min] | Compound Name |
|---|-------------------|--------------|--------------|----------|------------|-----------|---------------|
| 1 | 15,940            | 6853,907     | 246,387      | 50,3     | 66,8       | 0,40      |               |
| 2 | 22,053            | 6783,854     | 122,254      | 49,7     | 33,2       | 0,84      |               |
|   | Total             | 13637,761    | 368,642      | 100,0    | 100,0      |           |               |

#### 4.15. HPLC Chromatograms of compound (5o)

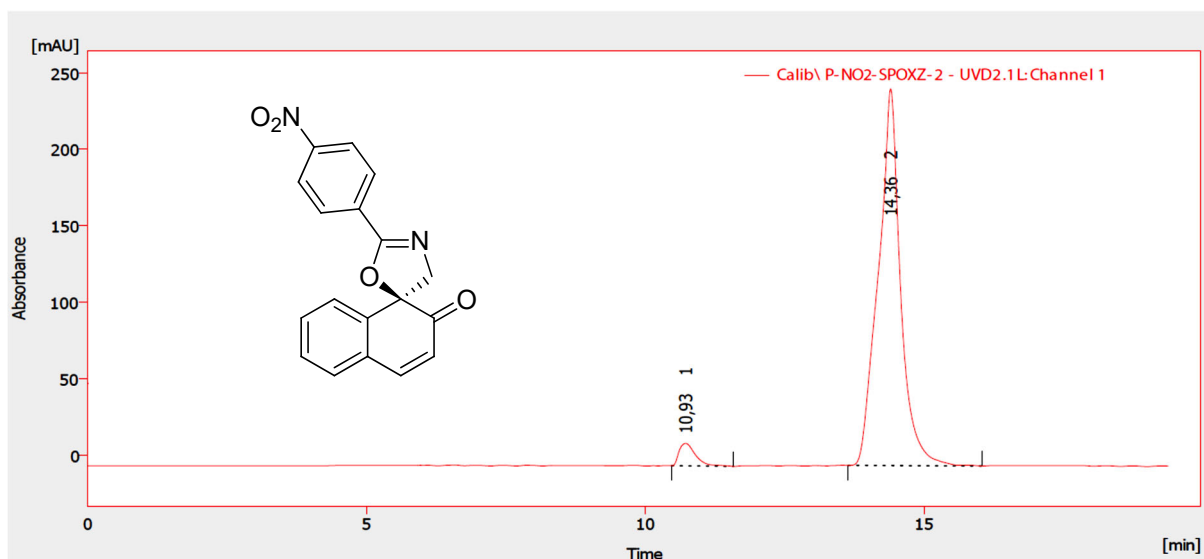

|   | Reten. Time [min] | Area [mAU.s] | Height [mAU] | Area [%] | Height [%] | W05 [min] | Compound Name |
|---|-------------------|--------------|--------------|----------|------------|-----------|---------------|
| 1 | 10,933            | 312,135      | 14,897       | 4,6      | 5,6        | 0,31      |               |
| 2 | 14,362            | 6473,403     | 251,123      | 95,4     | 94,4       | 0,40      |               |
|   | Total             | 6785,538     | 266,020      | 100,0    | 100,0      |           |               |

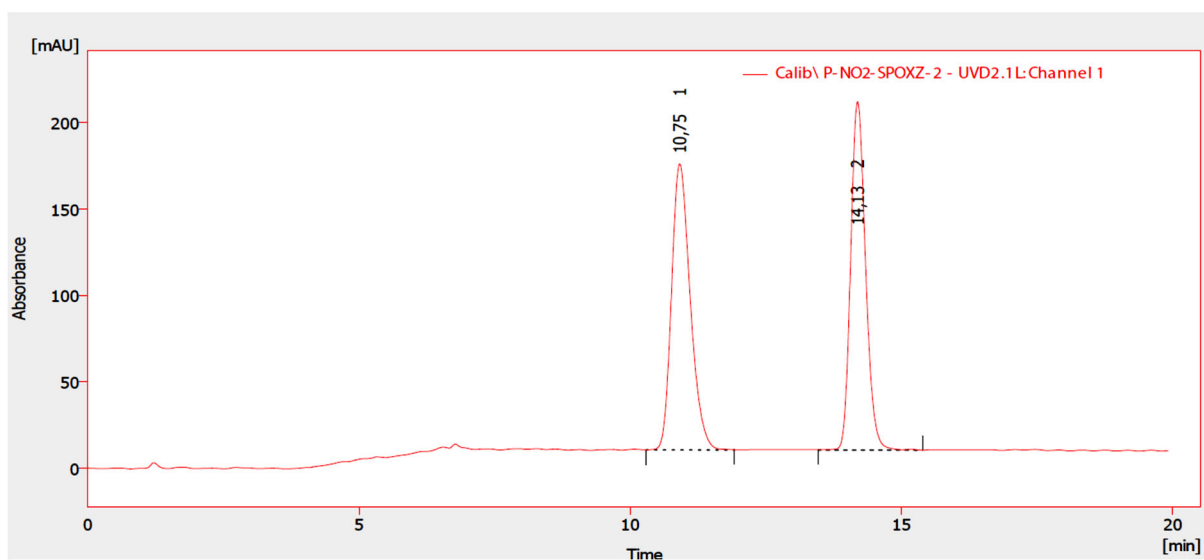

|   | Reten. Time [min] | Area [mAU.s] | Height [mAU] | Area [%] | Height [%] | W05 [min] | Compound Name |
|---|-------------------|--------------|--------------|----------|------------|-----------|---------------|
| 1 | 10,747            | 2880,843     | 175,341      | 50,4     | 46,2       | 0,34      |               |
| 2 | 14,132            | 2835,115     | 204,186      | 49,6     | 53,8       | 0,29      |               |
|   | Total             | 5715,958     | 379,527      | 100,0    | 100,0      |           |               |

#### 4.16. HPLC Chromatograms of compound (5p)

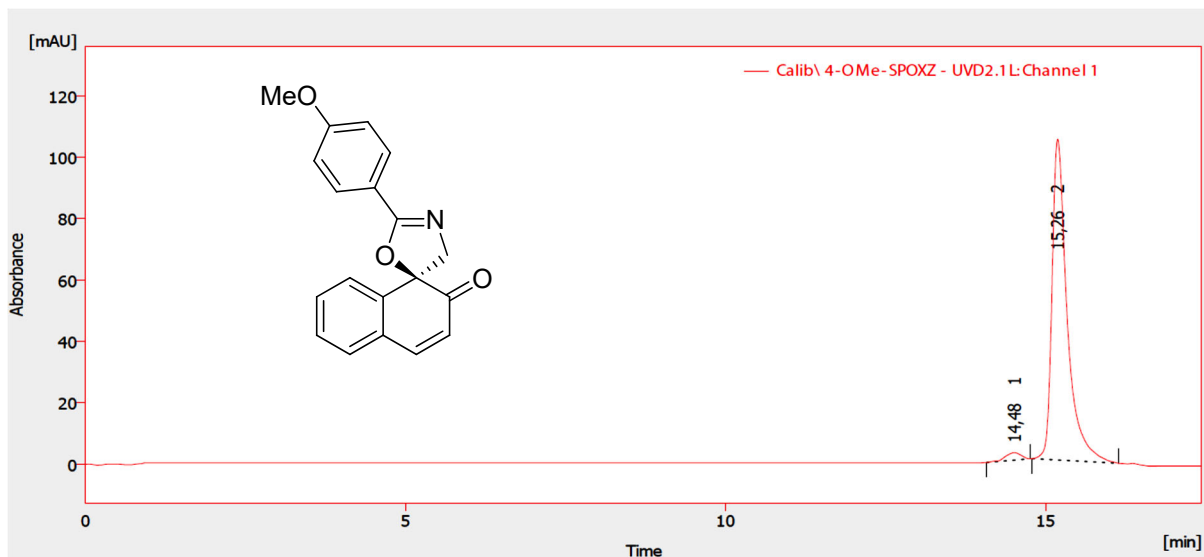

|   | Reten. Time [min] | Area [mAU.s] | Height [mAU] | Area [%] | Height [%] | W05 [min] | Compound Name |
|---|-------------------|--------------|--------------|----------|------------|-----------|---------------|
| 1 | 14,479            | 41,326       | 2,457        | 2,3      | 2,3        | 0,28      |               |
| 2 | 15,263            | 1720,084     | 104,526      | 97,7     | 97,7       | 0,23      |               |
|   | Total             | 1761,411     | 106,982      | 100,0    | 100,0      |           |               |

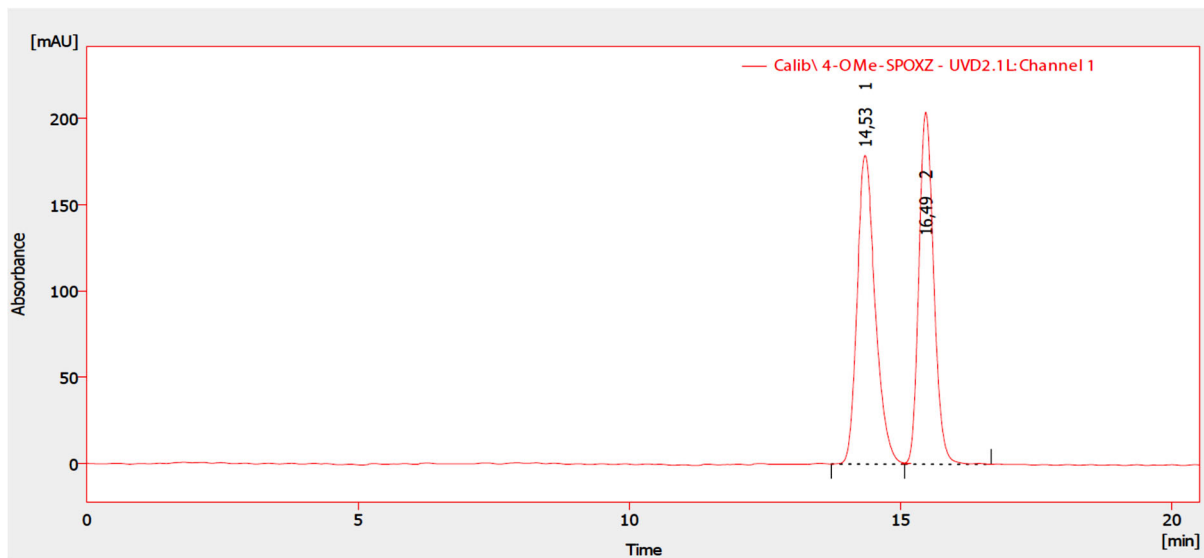

|   | Reten. Time [min] | Area [mAU.s] | Height [mAU] | Area [%] | Height [%] | W05 [min] | Compound Name |
|---|-------------------|--------------|--------------|----------|------------|-----------|---------------|
| 1 | 14,527            | 4156,360     | 185,038      | 50,5     | 47,9       | 0,35      |               |
| 2 | 16,487            | 4074,055     | 201,263      | 49,5     | 52,1       | 0,31      |               |
|   | Total             | 8230,415     | 386,301      | 100,0    | 100,0      |           |               |

#### 4.17. HPLC Chromatograms of compound (5q)

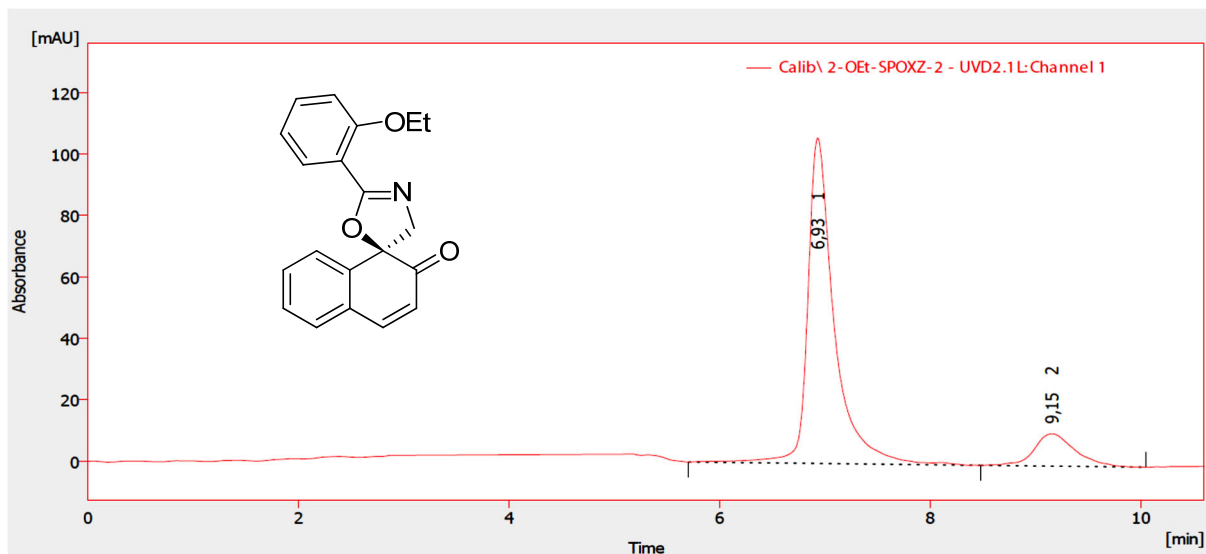

|   | Reten. Time [min] | Area [mAU.s] | Height [mAU] | Area [%] | Height [%] | W05 [min] | Compound Name |
|---|-------------------|--------------|--------------|----------|------------|-----------|---------------|
| 1 | 6,930             | 1866,073     | 105,956      | 86,6     | 91,0       | 0,23      |               |
| 2 | 9,153             | 287,944      | 10,514       | 13,4     | 9,0        | 0,40      |               |
|   | Total             | 2154,017     | 116,470      | 100,0    | 100,0      |           |               |

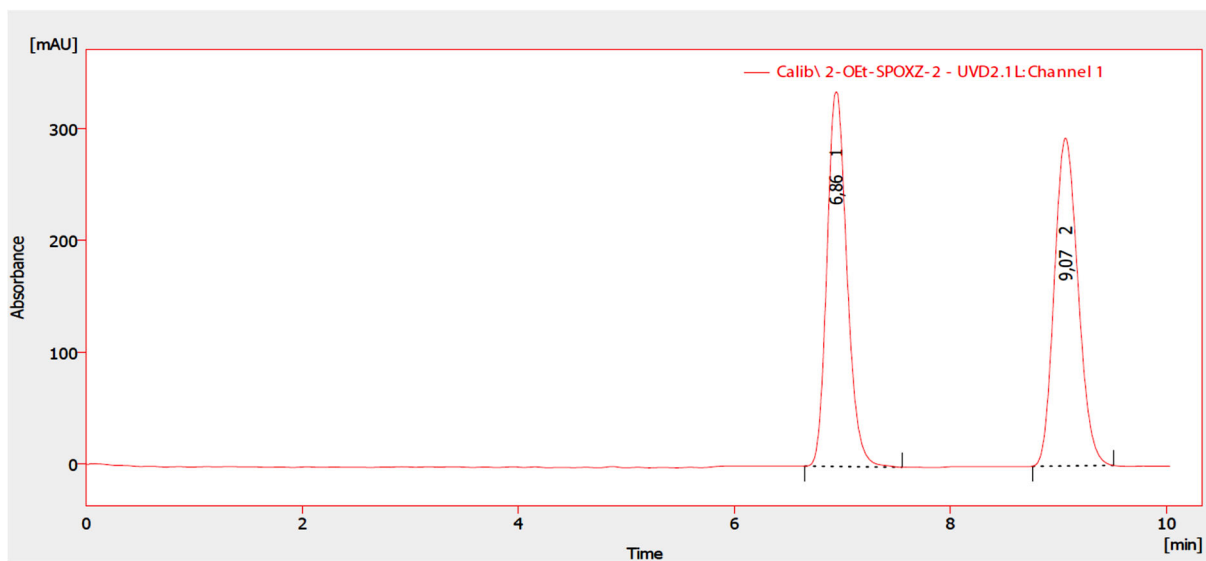

|   | Reten. Time [min] | Area [mAU.s] | Height [mAU] | Area [%] | Height [%] | W05 [min] | Compound Name |
|---|-------------------|--------------|--------------|----------|------------|-----------|---------------|
| 1 | 6,861             | 3718,137     | 334,107      | 49,3     | 52,8       | 0,18      |               |
| 2 | 9,067             | 3823,723     | 297,682      | 50,7     | 47,2       | 0,25      |               |
|   | Total             | 7541,860     | 631,789      | 100,0    | 100,0      |           |               |

#### 4.18. HPLC Chromatograms of compound (5r)

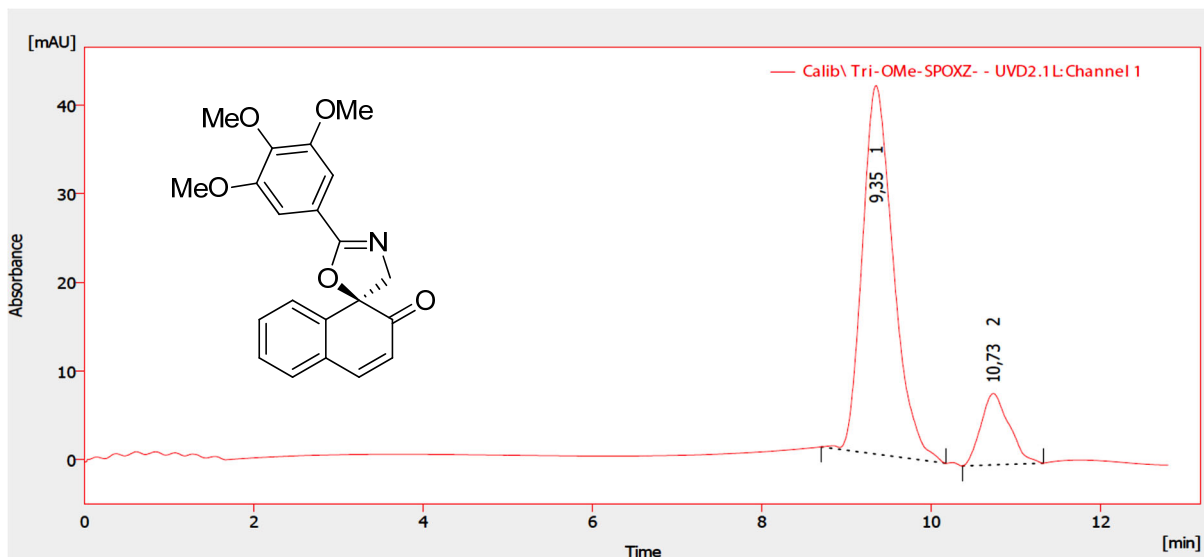

|   | Reten. Time [min] | Area [mAU.s] | Height [mAU] | Area [%] | Height [%] | W05 [min] | Compound Name |
|---|-------------------|--------------|--------------|----------|------------|-----------|---------------|
| 1 | 9,347             | 1060,707     | 41,624       | 85,0     | 83,8       | 0,39      |               |
| 2 | 10,730            | 187,785      | 8,062        | 15,0     | 16,2       | 0,38      |               |
|   | Total             | 1248,491     | 49,686       | 100,0    | 100,0      |           |               |

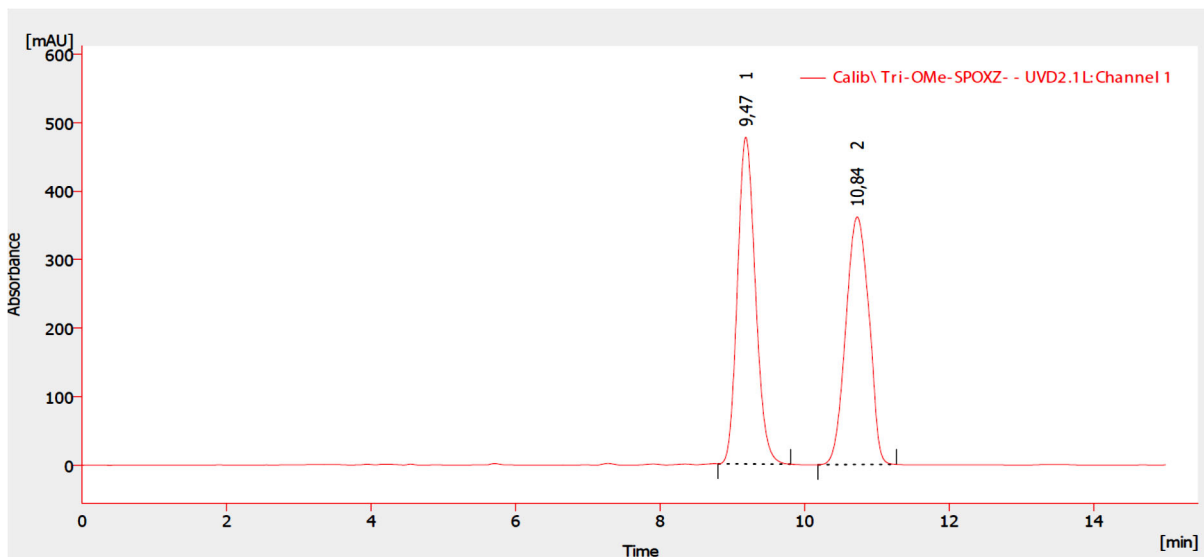

|   | Reten. Time [min] | Area [mAU.s] | Height [mAU] | Area [%] | Height [%] | W05 [min] | Compound Name |
|---|-------------------|--------------|--------------|----------|------------|-----------|---------------|
| 1 | 9,468             | 6877,854     | 487,259      | 50,1     | 54,6       | 0,28      |               |
| 2 | 10,841            | 6850,397     | 406,156      | 49,9     | 45,4       | 0,39      |               |
|   | Total             | 13728,251    | 892,415      | 100,0    | 100,0      |           |               |



#### 4.19. HPLC Chromatograms of compound (5s)

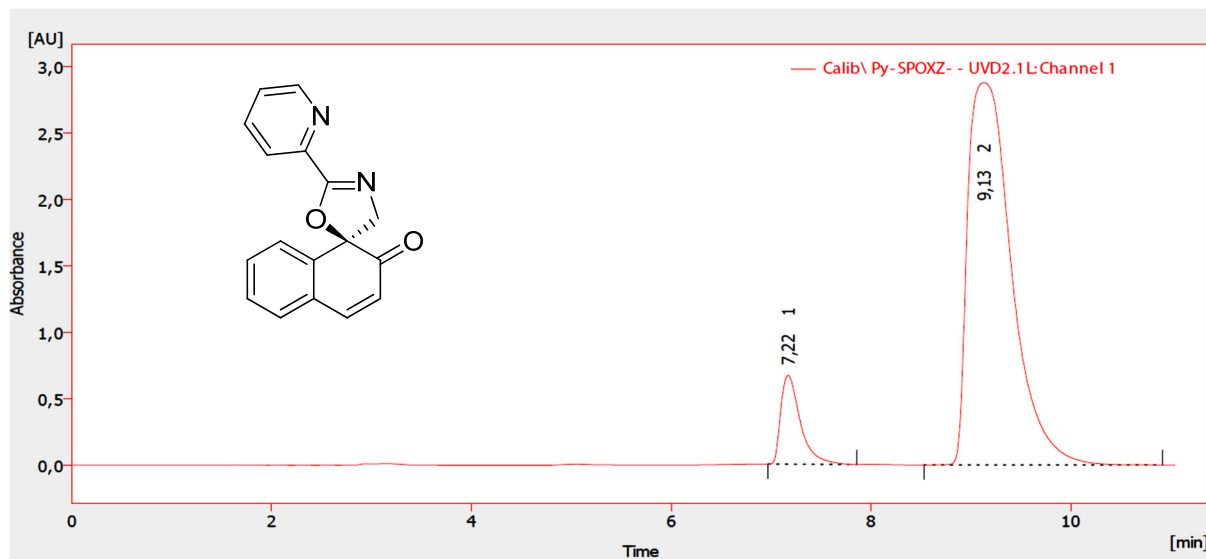

|   | Reten. Time [min] | Area [mAU.s] | Height [mAU] | Area [%] | Height [%] | W05 [min] | Compound Name |
|---|-------------------|--------------|--------------|----------|------------|-----------|---------------|
| 1 | 7,223             | 9106,941     | 668,811      | 9,4      | 18,9       | 0,21      |               |
| 2 | 9,130             | 87600,422    | 2878,629     | 90,6     | 81,1       | 0,47      |               |
|   | Total             | 96707,363    | 3547,440     | 100,0    | 100,0      |           |               |

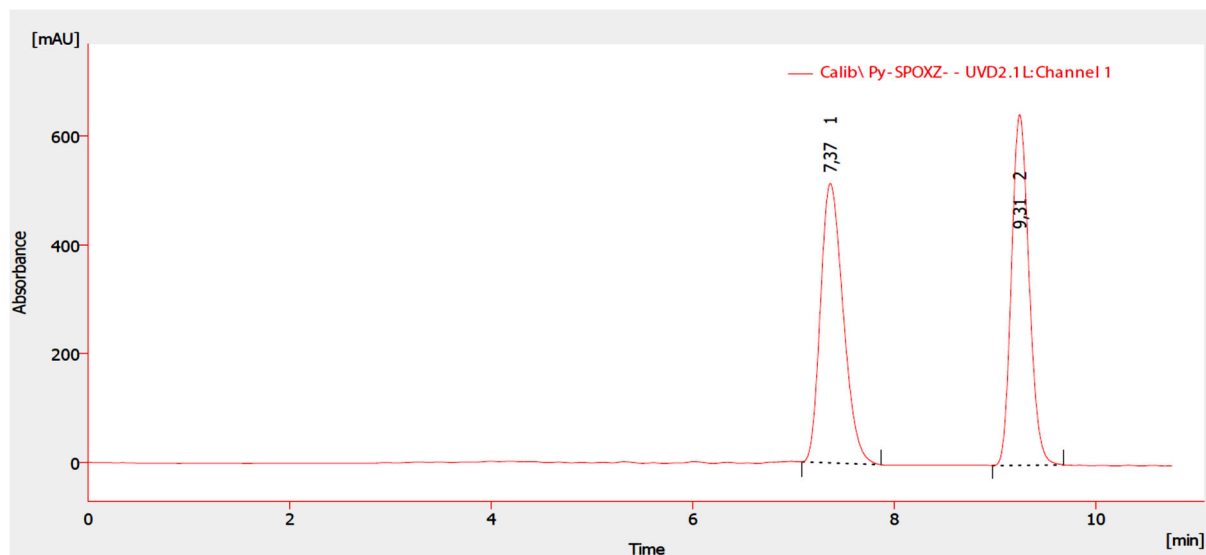

|   | Reten. Time [min] | Area [mAU.s] | Height [mAU] | Area [%] | Height [%] | W05 [min] | Compound Name |
|---|-------------------|--------------|--------------|----------|------------|-----------|---------------|
| 1 | 7,371             | 6443,097     | 522,567      | 50,5     | 45,1       | 0,25      |               |
| 2 | 9,314             | 6315,511     | 636,118      | 49,5     | 54,9       | 0,19      |               |
|   | Total             | 12758,608    | 1158,685     | 100,0    | 100,0      |           |               |

#### 4.20. HPLC Chromatograms of compound (7)

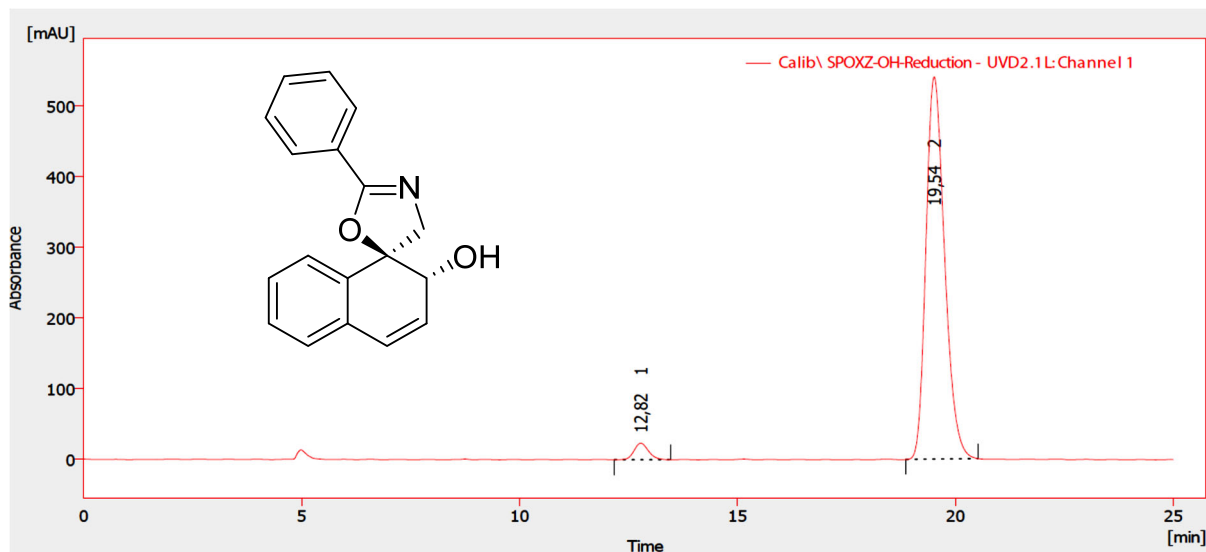

|   | Reten. Time [min] | Area [mAU.s] | Height [mAU] | Area [%] | Height [%] | W05 [min] | Compound Name |
|---|-------------------|--------------|--------------|----------|------------|-----------|---------------|
| 1 | 12,817            | 494,767      | 22,274       | 2,7      | 3,9        | 0,35      |               |
| 2 | 19,541            | 17829,946    | 519,249      | 97,3     | 96,1       | 0,46      |               |
|   | Total             | 18324,713    | 571,140      | 100,0    | 100,0      |           |               |

#### 4.21. HPLC Chromatograms of compound (8)

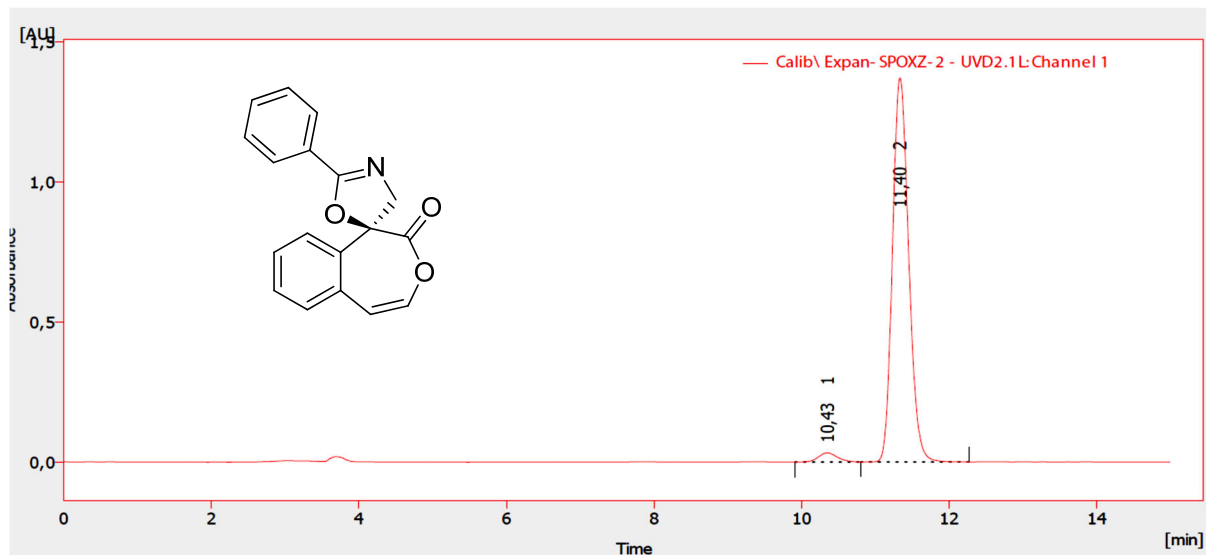

|   | Reten. Time [min] | Area [mAU.s] | Height [mAU] | Area [%] | Height [%] | W05 [min] | Compound Name |
|---|-------------------|--------------|--------------|----------|------------|-----------|---------------|
| 1 | 10,427            | 404,009      | 35,294       | 2,2      | 2,5        | 0,29      |               |
| 2 | 11,410            | 17960,018    | 1376,457     | 97,8     | 97,5       | 0,22      |               |
|   | Total             | 18364,027    | 1411,751     | 100,0    | 100,0      |           |               |

## 5. Computational Studies

### 5.1. Computational Details

All quantum chemical calculations were performed with Gaussian 09.<sup>7</sup> Geometries were optimized with B3LYP method and 6-31++G\*\* basis set. Minimum structures were confirmed by the absence of imaginary frequencies in the harmonic frequency calculation. Calculations were done in chloroform applying polarizable continuum solvation model (PCM). The CD-spectrum to confirm the absolute configuration of the spirooxazoline (**S**)-**5a** was calculated with TDDFT on a B3LYB/6-31++G\*\* level of theory.

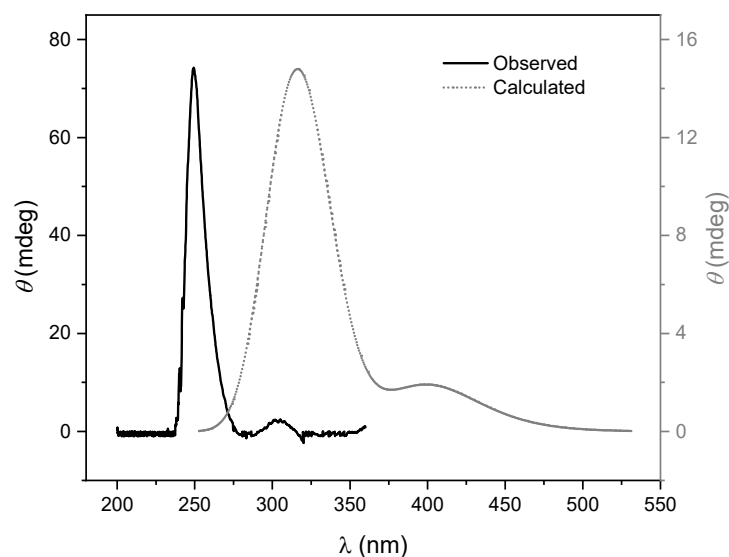

**Figure S-1.** Calculated and observed CD Spectra of compound **5a**.

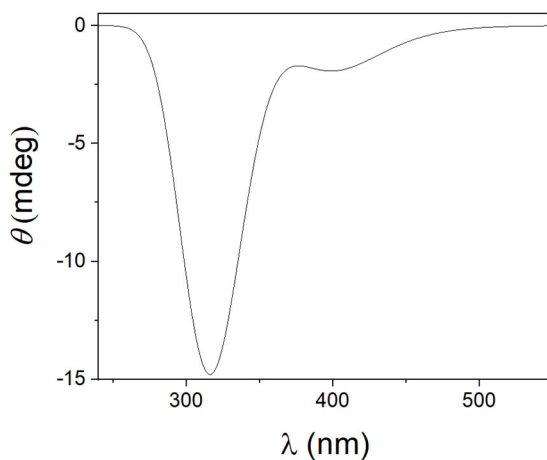

**Figure S-2** Calculated CD Spectrum of (*R*) enantiomer of compound **5a**.

### a. Calculated Coordinates of the Optimized Structure

#### Compound 5a

| Center<br>Number | Atomic<br>Number | Atomic<br>Type | Coordinates (Angstroms) |           |           |
|------------------|------------------|----------------|-------------------------|-----------|-----------|
|                  |                  |                | X                       | Y         | Z         |
| 1                | 6                | 0              | -2.573730               | 2.802130  | 0.095600  |
| 2                | 6                | 0              | -1.585580               | 1.813160  | 0.152620  |
| 3                | 6                | 0              | -3.915020               | 2.449111  | -0.084040 |
| 4                | 6                | 0              | -4.261030               | 1.105771  | -0.222540 |
| 5                | 6                | 0              | -3.274730               | 0.104670  | -0.182080 |
| 6                | 6                | 0              | -1.923990               | 0.465100  | 0.020340  |
| 7                | 1                | 0              | -0.547310               | 2.097590  | 0.294330  |
| 8                | 1                | 0              | -2.293340               | 3.847280  | 0.193570  |
| 9                | 1                | 0              | -4.683370               | 3.216101  | -0.121540 |
| 10               | 1                | 0              | -5.299200               | 0.821051  | -0.375680 |
| 11               | 6                | 0              | -0.880090               | -0.621170 | 0.172630  |
| 12               | 6                | 0              | -1.277560               | -1.989090 | -0.417120 |
| 13               | 6                | 0              | -2.707030               | -2.280570 | -0.511060 |
| 14               | 6                | 0              | -3.626940               | -1.292920 | -0.398780 |
| 15               | 1                | 0              | -2.988340               | -3.303350 | -0.743850 |
| 16               | 1                | 0              | -4.683100               | -1.525749 | -0.521150 |
| 17               | 8                | 0              | 0.368770                | -0.205740 | -0.418850 |
| 18               | 6                | 0              | -0.471020               | -0.854360 | 1.694130  |
| 19               | 7                | 0              | 0.965990                | -0.618240 | 1.727300  |
| 20               | 1                | 0              | -0.697170               | -1.872130 | 2.028810  |
| 21               | 1                | 0              | -0.992580               | -0.156190 | 2.357330  |
| 22               | 6                | 0              | 1.336070                | -0.279530 | 0.551490  |

|    |   |   |           |           |           |
|----|---|---|-----------|-----------|-----------|
| 23 | 6 | 0 | 2.702460  | 0.065490  | 0.126990  |
| 24 | 6 | 0 | 3.740330  | 0.072880  | 1.074690  |
| 25 | 6 | 0 | 2.981430  | 0.388110  | -1.210560 |
| 26 | 6 | 0 | 4.284060  | 0.716420  | -1.593040 |
| 27 | 6 | 0 | 5.038020  | 0.401240  | 0.687260  |
| 28 | 6 | 0 | 5.313370  | 0.724620  | -0.647420 |
| 29 | 1 | 0 | 3.517410  | -0.180340 | 2.106120  |
| 30 | 1 | 0 | 5.835980  | 0.404840  | 1.424900  |
| 31 | 1 | 0 | 6.326330  | 0.979950  | -0.947490 |
| 32 | 1 | 0 | 2.183020  | 0.377300  | -1.944730 |
| 33 | 1 | 0 | 4.493640  | 0.963670  | -2.630210 |
| 34 | 8 | 0 | -0.409770 | -2.805350 | -0.714420 |

-----

## 6. References

- 1 W. L. F. Armarego and C. L. L. Chai, eds., *Purification of laboratory chemicals*, Butterworth-Heinemann, Amsterdam, Oxford, 6th edn., 2009.
- 2 S. Zhou, G. Chen and G. Huang, Design, synthesis and biological evaluation of lazabemide derivatives as inhibitors of monoamine oxidase, *Bioorg. Med. Chem.*, 2018, **26**, 4863–4870.
- 3 G. B. Barlin, L. P. Davies, S. J. Ireland, M. M. Ngu and J. K. Zhang, Imidazo[1,2-b]pyridazines. X. Syntheses and Central Nervous System Activities of Some 3-(Acetamido, benzamido, substituted benzamido or dimethylamino)methyl-2-(phenyl or substituted phenyl)-6-(halogeno, alkylthio, alkoxy, phenylthio, phenoxy, benzylthio or benzyloxy)imidazo[1,2-b]pyridazines, *Aust. J. Chem.*, 1992, **45**, 731.
- 4 J. L. Murphy, W. J. Tenn, J. J. Labuda and R. W. Nagorski, Rapid amidic hydrolysis: a competitive reaction pathway under basic conditions for N-(hydroxymethyl)benzamide derivatives bearing electron-donating groups, *Tetrahedron Lett.*, 2009, **50**, 7358–7361.
- 5 L.-P. Liu, L.-M. Yu, Z.-M. Zhang and X.-F. Yan, Synthesis of 1-Amidoalkyl-2-Naphthols by Two-Component Friedel-Crafts Reaction, *Asian J. Chem.*, 2013, **25**, 4121–4122.
- 6 M. U. Tariq and W. J. Moran, Spirooxazoline Synthesis by an Oxidative Dearomatizing Cyclization, *Eur. J. Org. Chem.*, 2020, 5153–5160.
- (7) Gaussian 09, Revision B.01, M. J. Frisch, G. W. Trucks, H. B. Schlegel, G. E. Scuseria, M. A. Robb, J. R. Cheeseman, G. Scalmani, V. Barone, B. Mennucci, G. A. Petersson, H. Nakatsuji, M. Caricato, X. Li, H. P. Hratchian, A. F. Izmaylov, J. Bloino, G. Zheng, J. L. Sonnenberg, M. Hada, M. Ehara, K. Toyota, R. Fukuda, J. Hasegawa, M. Ishida, T. Nakajima, Y. Honda, O. Kitao, H. Nakai, T. Vreven, J. A. Montgomery, Jr., J. E. Peralta, F. Ogliaro, M. Bearpark, J. J. Heyd, E. Brothers, K. N. Kudin, V. N. Staroverov, T. Keith, R. Kobayashi, J. Normand, K. Raghavachari, A. Rendell, J. C. Burant, S. S. Iyengar, J. Tomasi, M. Cossi, N. Rega, J. M. Millam, M. Klene, J. E. Knox, J. B. Cross, V. Bakken, C. Adamo, J. Jaramillo, R. Gomperts, R. E. Stratmann, O. Yazyev, A. J. Austin, R. Cammi, C. Pomelli, J. W. Ochterski, R. L. Martin, K. Morokuma, V. G. Zakrzewski, G. A. Voth, P. Salvador, J. J. Dannenberg, S. Dapprich, A. D. Daniels, O. Farkas, J. B. Foresman, J. V. Ortiz, J. Cioslowski, and D. J. Fox, Gaussian, Inc., Wallingford CT, 2010.
